# Supplementary material
Source: HighWire-hosted journal article supplement (doi:10.1101/rna.080873.125)
Supplement: Supplemental_Data.docx [file Supplemental_Data.docx]

**Supplementary Data**

**Editing-independent effects of *Drosophila* Adar on heterochromatin silencing**

Khadija Hajji1#, Damiano Amoruso1,2#, Barbora Nováková1#, Nagraj Sambrani1, Deying Yang1,3, Anzer Khan1, Vojtech Bystry1, Alejandro Medaglia-Mata 1,4, Domenico Alessandro Silvestris5, Ernesto Picardi5,6 , Mary A. O’Connell1* and Liam P. Keegan1*

1CEITEC Masaryk University, Kamenice 735/5, E35, Brno, 62500, Czech Republic. 2National Centre for Biomolecular Research, Faculty of Science, Masaryk University, Kamenice 5, 625 00 Brno, Czech Republic. 3College of Animal Science and Technology, Sichuan Agricultural University, Chengdu 611130, Sichuan, China. 4Department of Biology, Faculty of Medicine, Masaryk University, Brno, Czech Republic. 5Department of Biosciences, Biotechnology and Environment, University of Bari "Aldo Moro", Via Orabona 4, Bari, 70124, Italy. 6Institute of Biomembranes, Bioenergetics and Molecular Biotechnologies, National Research Council of Italy, Via Giovanni Amendola, Bari, 122/O, 70126, Italy

**Supplemental Table S1. List of transcripts included in the top 10 enriched Biological Process GO terms for genes that are significantly overexpressed in *Act5Cts> AdarG* pupae vs wild type pupae.**

| **GO term** | **Increased transcripts** |
| --- | --- |
| response to bacterium | *PGRP-SB2; AttC; Eig71Ec; Eig71Ed; wntD; Eig71Eh; Eig71Ei; Eig71Ef; Listericin; LysX; Eig71Eg; Ets21C; Dro; AttB; CecB; CecA2; PGRP-SC1b; TotM; LysP; TotZ; DptB; CecC; edin; AttA; hemo; DptA; CecA1; GNBP-like3; Npc2e* |
| defense response to bacterium | *PGRP-SB2; AttC; Eig71Ec; Eig71Ed; wntD; Eig71Eh; Eig71Ei; Eig71Ef; Listericin; LysX; Eig71Eg; Ets21C; Dro; AttB; CecB; CecA2; PGRP-SC1b; TotM; LysP; DptB; CecC; edin; AttA; hemo; DptA; CecA1; Npc2e* |
| immune response | *PGRP-SB2; AttC; CG5246; upd3; CG5909; Dro; AttB; CecB; CG18180; CecA2; PGRP-SC1b; CG14499; CG18179; Eig71Ee; DptB; CecC; CG8329; edin; AttA; CG33465; DptA; CecA1; GNBP-like3* |
| defense response to symbiont | *PGRP-SB2; AttC; CG5246; Listericin; upd3; CG5909; Dro; AttB; CecB; CG18180; CecA2; PGRP-SC1b; CG18179; Eig71Ee; CecC; CG8329; AttA; CG33465; DptA; CecA1; GNBP-like3* |
| response to abiotic stimulus | *Hsp70Ba; Fst; w; Hsp70Aa; TotM; Hsp70Bb; Hsp70Bbb; TotZ; Hsp22; Hsp70Ab; Hsp26; Adar; AttA; Hsp70Bc; DptA; amn* |
| humoral immune response | *AttC; upd3; Dro; AttB; CecB; CecA2; PGRP-SC1b; Eig71Ee; DptB; CecC; edin; AttA; DptA; CecA1* |
| response to temperature stimulus | *Hsp70Ba; Fst; Hsp70Aa; TotM; Hsp70Bb; Hsp70Bbb; TotZ; Hsp22; Hsp70Ab; Hsp26; Adar; Hsp70Bc; amn* |
| defense response to Gram-positive bacterium | *AttC; wntD; Listericin; Dro; AttB; CecB; CecA2; TotM; DptB; CecC; edin; AttA; CecA1* |
| defense response to Gram-negative bacterium | *Listericin; LysX; Dro; CecB; CecA2; PGRP-SC1b; LysP; CecC; edin; AttA; DptA; CecA1* |
| response to heat | *Hsp70Ba; Hsp70Aa; TotM; Hsp70Bb; Hsp70Bbb; TotZ; Hsp22; Hsp70Ab; Hsp26; Adar; Hsp70Bc; amn* |

**Supplemental Table S2. List of transcripts with more than a thirty percent increase in A-to-I editing in *Act5Cts> AdarG* pupae compared to wild type.**

| **Transcript** | **Genomic site** | **Increased editing (%)** | **Region** | **Amino acid change and additional notes** |
| --- | --- | --- | --- | --- |
| *pico* | X:19835017 | +32% | exonic | K604R, both residues are positively charged |
| *Mhc* | 2L:16780080 | +34% | intronic |  |
| *CAP* | 2R:10280988 | +31% | exonic | S550G, outside of functional domain |
| *Prosap* | 2R:14062507 | +30% | exonic | Q1812R, inside of a polyQ region |
| *dnr1* | 2R:22564377 | +37% | exonic | I592V, outside of functional domain |
| *sls* | 3L:2039908 | +35% | 3’UTR |  |
| *sls* | 3L:2039918 | +31% | 3’UTR |  |
| *CG12581* | 3R:4185912 | +33% | 3’UTR |  |
| *CG12581* | 3R:4185926 | +30% | 3’UTR |  |
| *CG12581* | 3R:4185928 | +34% | 3’UTR |  |
| *CG12581* | 3R:4186053 | +37% | 3’UTR |  |
| *CG12581* | 3R:4186057 | +30% | 3’UTR |  |
| *CG12581* | 3R:4186091 | +40% | 3’UTR |  |


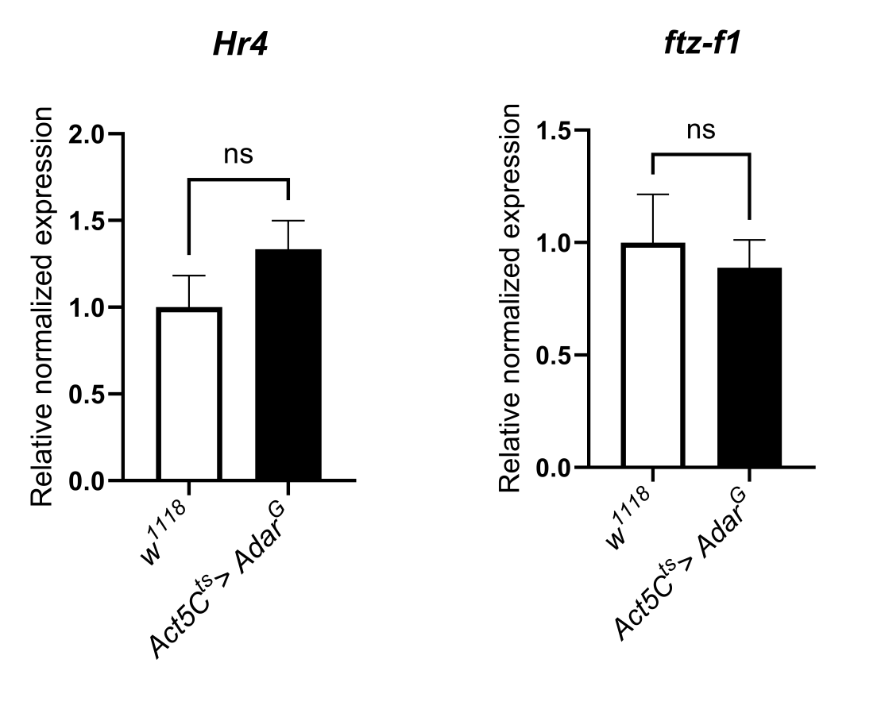


**Supplemental Figure S1. Mid-late ecdysone response gene (*Hr4* and *ftz-f1*) transcripts are not aberrantly elevated in AdarG overexpressing pupae**. RT-qPCR on RNA from pupae. Normalized expression levels of *Hr4* and *ftz-f1* transcripts in *Act5Cts> AdarG* relative to *w1118* wild type. *p*-values were calculated by Student’s *t*-test with Welch correction. ns: not significant. Error bars: SEM (Standard Error of Mean for biological replicates). See Supplemental Excel Table 8 for primers used.


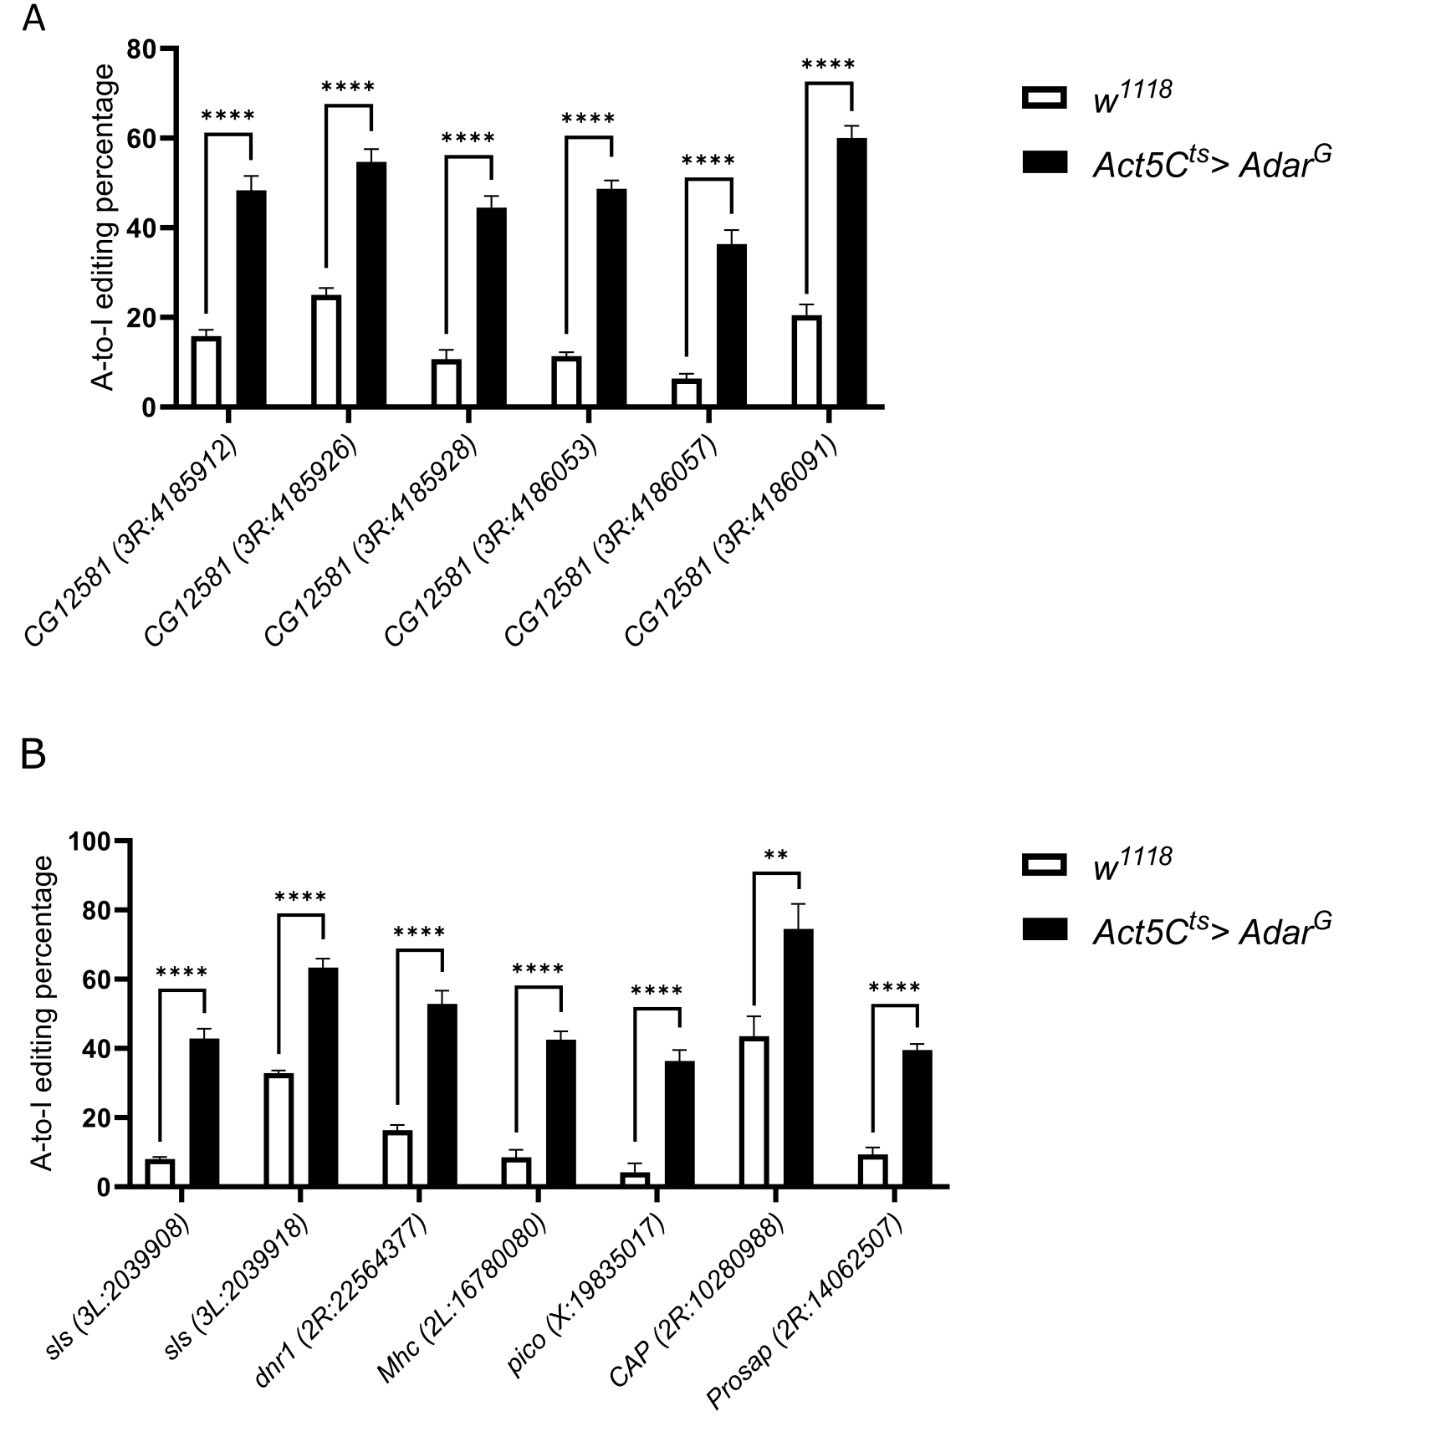


**Supplemental Figure S2.** **Sanger sequencing confirmation of increased editing in AdarG overexpressing pupae.*****(A)*** Editing analysis for *CG12581* transcript. ***(B)*** Editing analysis for *sls*, *dnr1*, *Mhc*, *pico*, *CAP* and *Prosap* transcripts. *p*-values were calculated by Student’s *t*-test with Welch correction. *: *p*-value < 0.05. **: *p*-value < 0.01. ***: *p*-value < 0.001. ****: *p*-value < 0.0001. ns: not significant. Error bars: SEM (Standard Error of Mean for biological replicates).

Six of the edting sites were located in the 3’UTR of the uncharacterized transcript *CG12581*. Two additional sites were located in the 3’UTR of *sallimus* *(sls)*, and one site was found in an intron of *Myosin heavy chain* *(Mhc)*, both of which encode key structural and contractile muscle proteins. Four editing sites were located in coding regions of four different transcripts: *pico*, *Cbl-associated protein (CAP)*, *Prosap* and *defense repressor 1 (dnr1)*, resulting in single amino acid substitutions. In *pico*, the *Drosophila* ortholog of mammalian lamellipodin (Lyulcheva et al. 2008), the editing-induced substitution K604R was identified, in which lysine at position 604 was replaced by arginine - both positively charged residues. In *CAP*, a cytoskeletal adaptor and vinculin-binding partner (Bharadwaj et al. 2013), an S550G substitution was observed. This residue lies outside of the known SH3 domains and annotated protein regions. Editing in *Prosap*, a scaffolding protein of the SHANK family located in postsynaptic densities (Liebl and Featherstone 2008), resulted in a Q1812R substitution within a polyQ stretch outside of functional domains. Finally, in *dnr1*, an inhibitor of the IMD signaling pathway (Primrose et al. 2007; Guntermann et al. 2009), increased editing led to an I592V substitution outside the protein’s RING-type domain.


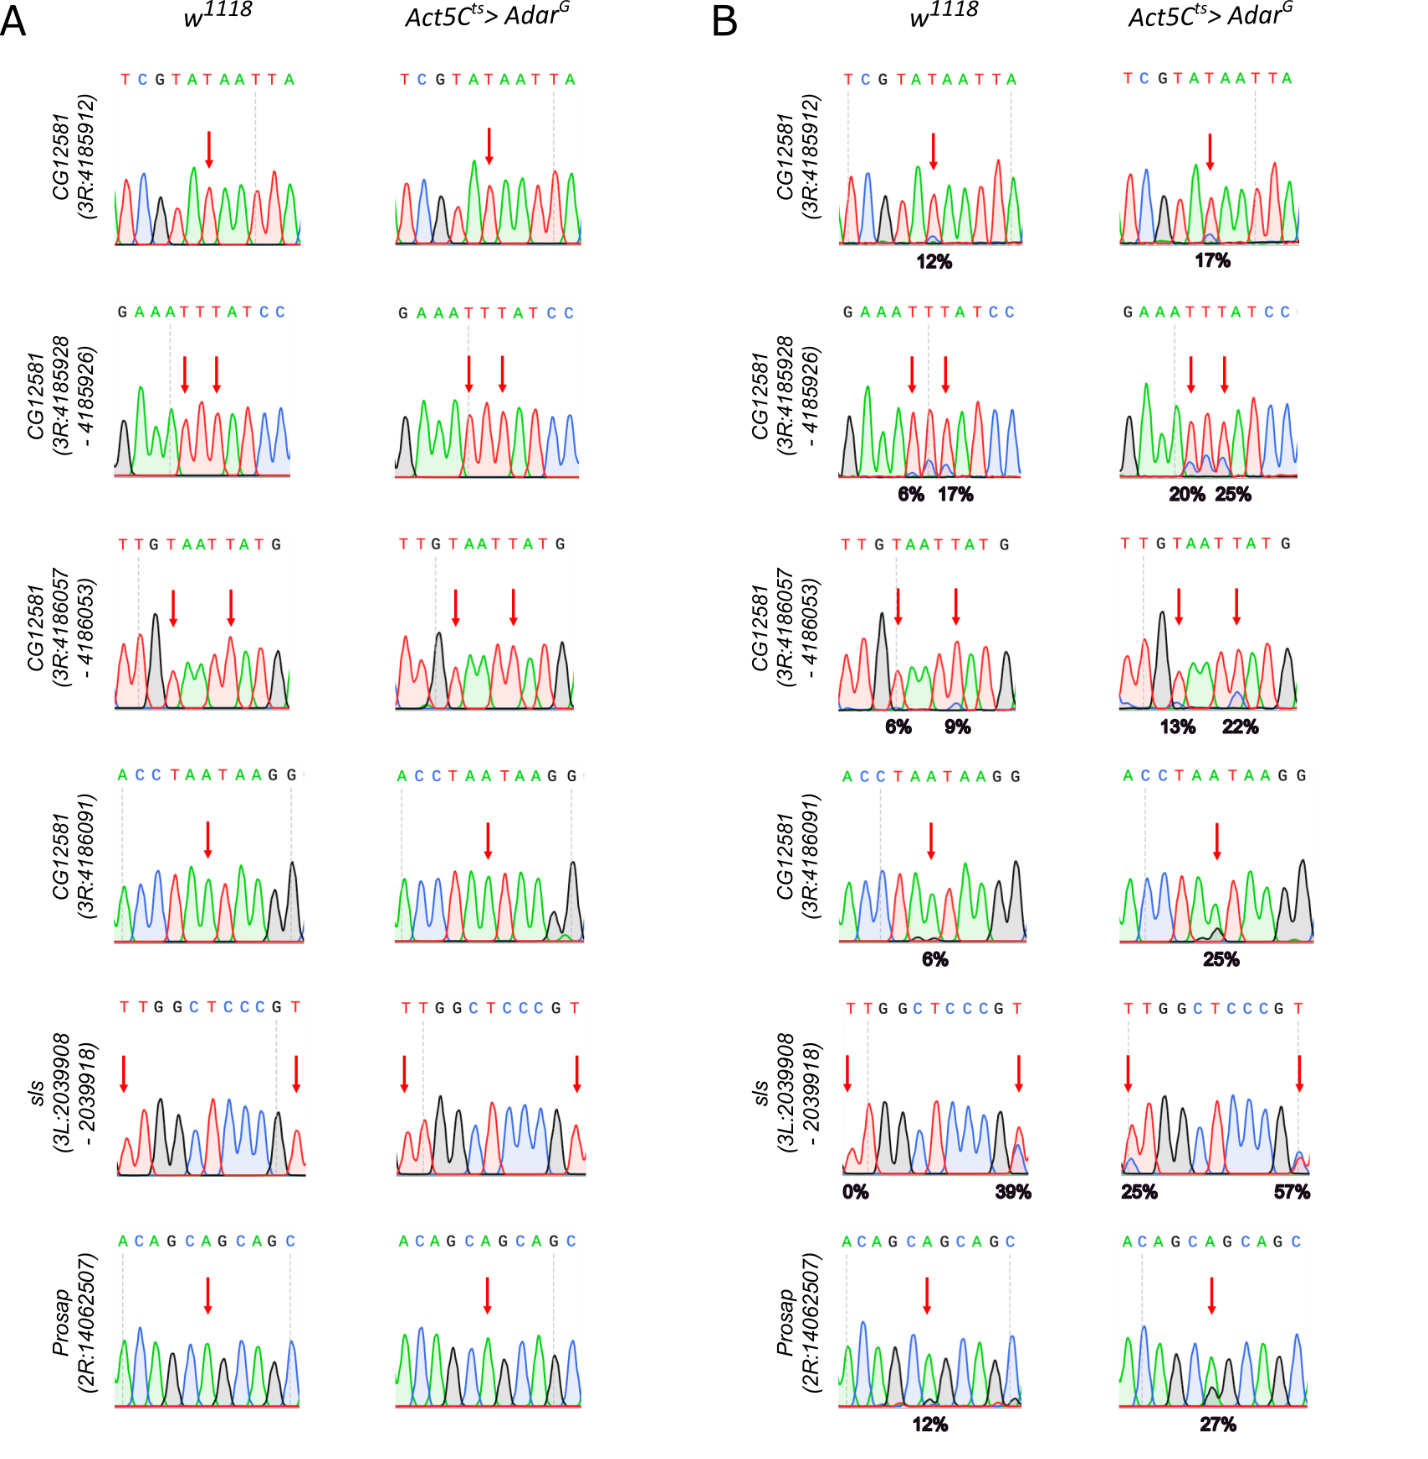


**Supplemental Figure S3. Sanger sequencing validation of increased editing in AdarG overexpressing pupae. *(A)*** Representative Sanger sequencing chromatograms showing genomic DNA sites corresponding to RNA hyper-edited sites in *Act5Cts> AdarG* pupae compared to wild type. The site of interest is highlighted with a red arrow. ***(B)*** Representative Sanger sequencing chromatograms showing RNA editing of transcripts that are hyper-edited in *Act5Cts> AdarG* pupae compared to wild type. The edited site is highlighted with a red arrow. See Supplemental Excel Table 8 for primers used.


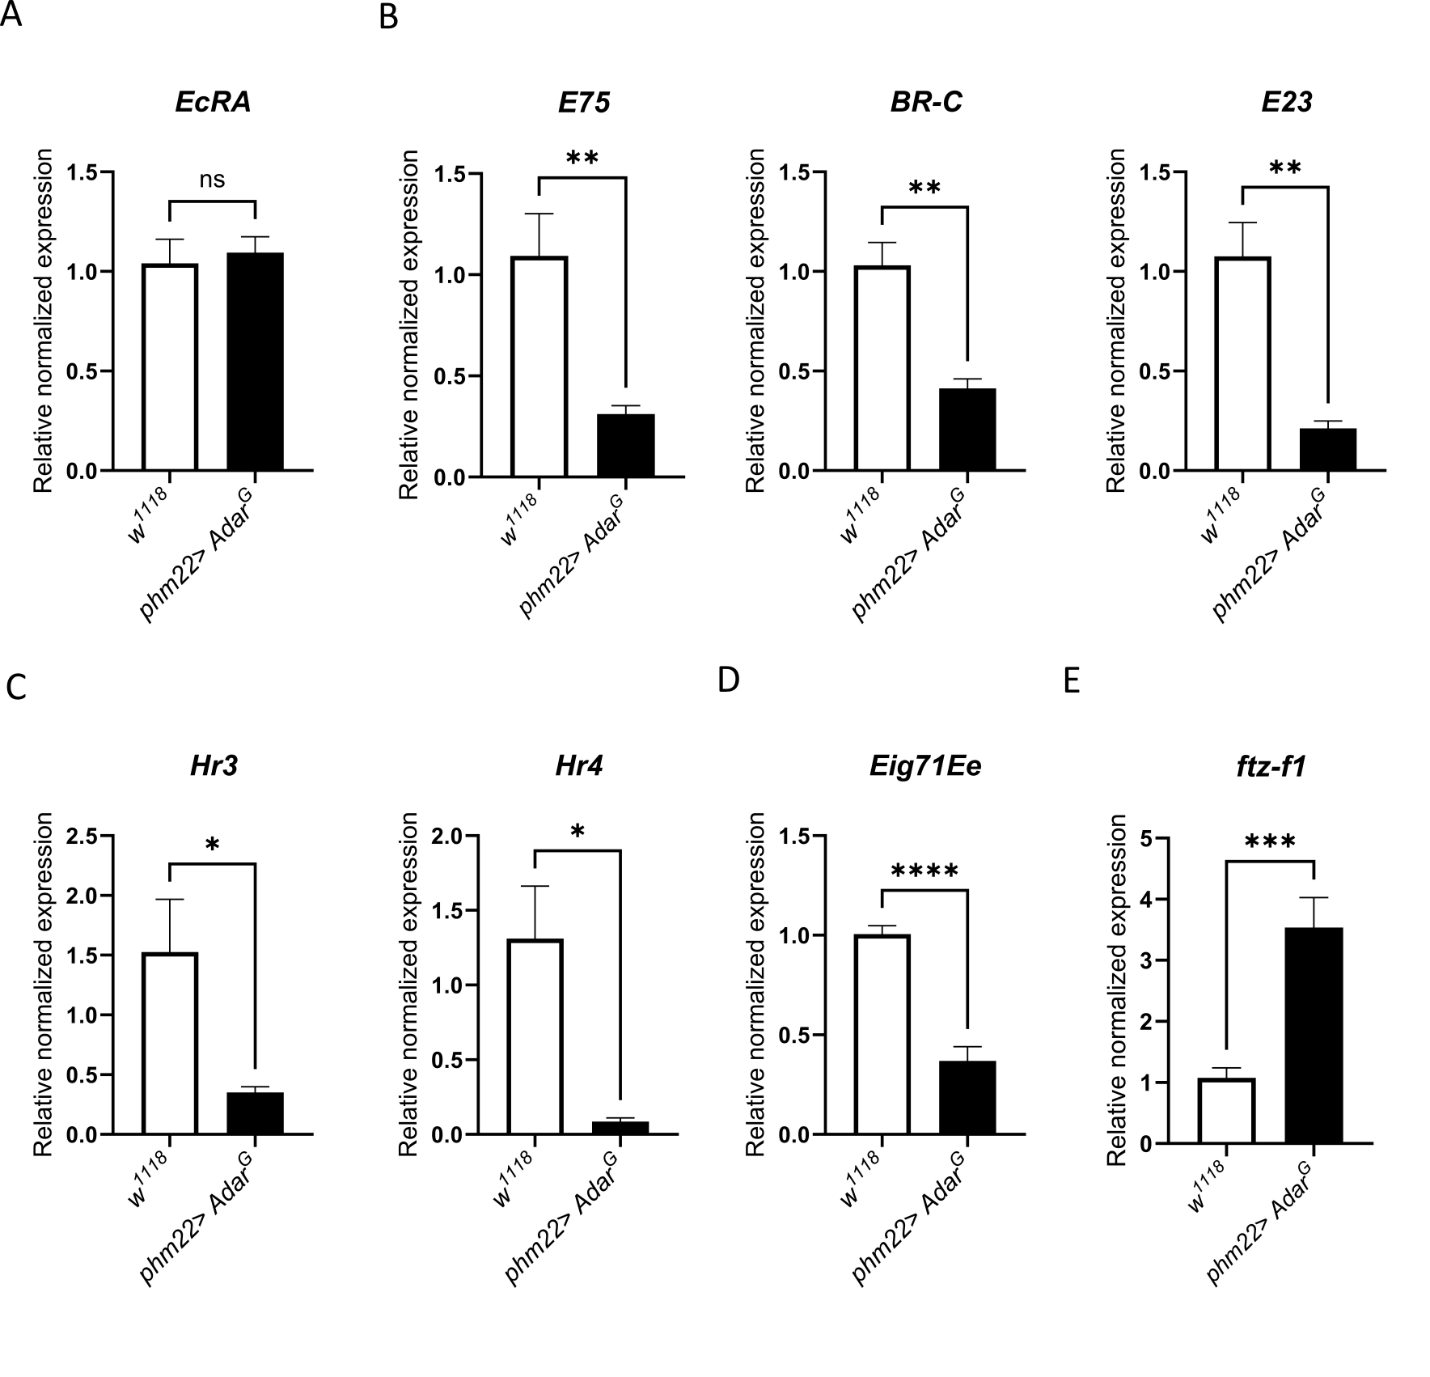


**Supplemental Figure S4. Levels of transcripts encoding ecdysone signaling proteins measured in RNA from *w1118* and *phm22> AdarG* giant wandering larvae.** ***(A)*** *EcRA* transcript expression level normalized to wild type. ***(B)*** Early ecdysone-response genes (*E75, BR-C, E23*) transcript expression levels normalized to wild type. ***(C)*** Early ecdysone-response gene (*Hr3, Hr4*) transcript expression levels normalized to wild type. ***(D)*** Late ecdysone-response gene *Eig71Ee* transcript expression level normalized to wild type. ***(E)*** *ftz-f1* transcript expression level normalized to wild type. *p*-values were calculated by Student’s *t*-test with Welch correction. *: *p*-value < 0.05. **: *p*-value < 0.01. ***: *p*-value < 0.001. ****: *p*-value < 0.0001. ns: not significant. Error bars: SEM (Standard Error of Mean for biological replicates). See Supplemental Excel Table 8 for primers used.

**References**

Bharadwaj R, Roy M, Ohyama T, Sivan-Loukianova E, Delannoy M, Lloyd TE, Zlatic M, Eberl DF, Kolodkin AL. 2013. Cbl-associated protein regulates assembly and function of two tension-sensing structures in Drosophila. *Development* **140**: 627-638.

Guntermann S, Primrose DA, Foley E. 2009. Dnr1-dependent regulation of the Drosophila immune deficiency signaling pathway. *Dev Comp Immunol* **33**: 127-134.

Liebl FL, Featherstone DE. 2008. Identification and investigation of Drosophila postsynaptic density homologs. *Bioinform Biol Insights* **2**: 369-381.

Lyulcheva E, Taylor E, Michael M, Vehlow A, Tan S, Fletcher A, Krause M, Bennett D. 2008. Drosophila pico and its mammalian ortholog lamellipodin activate serum response factor and promote cell proliferation. *Dev Cell* **15**: 680-690.

Primrose DA, Chaudhry S, Johnson AG, Hrdlicka A, Schindler A, Tran D, Foley E. 2007. Interactions of DNR1 with the apoptotic machinery of Drosophila melanogaster. *J Cell Sci* **120**: 1189-1199.
