# Supplementary material
Source: HighWire-hosted journal article supplement (doi:10.1101/rna.080873.125)
Supplement: Supplemental_Tables.xlsx [file Supplemental_Tables.xlsx]

## Sheet: Outline
	Sheet title in this file	Data displayed	Additional information
	Excel Table 1	DESeq2 results comparing Act5C-ts> AdarG to w1118 pupae.
	Excel Table 2	DESeq2 results comparing Act5C-ts> AdarG, Adar RNAi to Act5C-ts> AdarG pupae.
	Excel Table 3	DESeq2 results comparing Act5C-ts> AdarG, Adar RNAi to w1118 pupae.
	Excel Table 4	REDItools RNA editing site analysis in w1118 and Act5C-ts> AdarG and Act5C-ts> AdarG, Adar RNAi pupae.
	Excel Table 5	REDItools RNA editing site analysis in w1118 and Act5C-ts> AdarG and Act5C-ts> AdarG, Adar RNAi pupae after manual filtering.	Manually filtered SNPs are shaded in grey. RNA editing sites specifically discussed in the study are highlighted in green.
	Excel Table 6	REDItools RNA editing site analysis in dissected RG of Celera wandering larvae.
	Excel Table 7	DESeq2 results comparing phm22> AdarG to w1118 wandering larvae.
	Excel Table 8	List of primers used in this study.

## Sheet: Excel Table 1
Ensembl_Id	baseMean	log2FoldChange	lfcSE	pvalue	padj	significant_DE	Feature_name	biotype	stat	w_AdarOE_1_normCounts	w_AdarOE_2_normCounts	w_AdarOE_3_normCounts	w_AdarOE_4_normCounts	w_AdarOE_5_normCounts	w_AdarOE_6_normCounts	w_WT_1_normCounts	w_WT_2_normCounts	w_WT_3_normCounts	w_WT_4_normCounts	w_WT_5_normCounts	w_WT_6_normCounts	w_AdarOE_1_rawCounts	w_AdarOE_2_rawCounts	w_AdarOE_3_rawCounts	w_AdarOE_4_rawCounts	w_AdarOE_5_rawCounts	w_AdarOE_6_rawCounts	w_WT_1_rawCounts	w_WT_2_rawCounts	w_WT_3_rawCounts	w_WT_4_rawCounts	w_WT_5_rawCounts	w_WT_6_rawCounts
FBgn0002564	5619.39	10.8827	0.351788	2.39473e-135	7.48735e-132	TRUE	Lsp1gamma	protein_coding	24.7604	5744.78	6313.31	5332.52	7463.51	10582.1	7965.82	2.88331	0	3.892	0	0	4.4988	7503	7956	7031	9227	12571	10697	3	0	4	0	0	4
FBgn0035097	505.31	9.07737	0.480116	2.86227e-44	2.98306e-42	TRUE	CG13405	protein_coding	13.9567	648.147	536.401	637.546	600.933	629.086	542.756	0	0	0	0	0	0	772	627	785	677	675	690	0	0	0	0	0	0
FBgn0052581	609.886	9.07001	0.496121	6.222e-43	5.5582e-41	TRUE	CG32581	protein_coding	13.7355	661.943	427.261	863.229	809.296	1021.18	787.629	0	0	0	0	0	0	876	549	1131	1004	1210	1055	0	0	0	0	0	0
FBgn0031082	360.803	8.64279	0.459881	5.92878e-36	3.35814e-34	TRUE	CG17003	protein_coding	12.5183	598.307	552.744	670.834	604.964	727.881	595.331	0	0	0.976577	0	0	1.12761	783	698	885	746	855	804	0	0	1	0	0	1
FBgn0043577	267.296	8.21448	0.55256	4.55874e-36	2.6201e-34	TRUE	PGRP-SB2	protein_coding	12.5391	294.581	687.514	463.107	1812.83	912.027	626.067	0	4.21632	0	0	0	2.33839	393	885	621	2261	1068	867	0	4	0	0	0	2
FBgn0261505	167.301	7.76168	0.516619	3.57292e-33	1.66732e-31	TRUE	CR42653	pseudogene	11.9995	254.854	222.348	218.23	204.315	222.538	268.724	0	0	0	0	0	0	329	274	281	246	261	354	0	0	0	0	0	0
FBgn0038160	55.9361	7.33628	0.701089	4.04281e-21	6.95284e-20	TRUE	CG9759	protein_coding	9.4315	6.99307	201.084	312.381	193.185	179.289	101.822	0	0	0	0	0	0	5	159	235	140	119	80	0	0	0	0	0	0
FBgn0052762	148.175	7.27881	0.442574	1.82554e-49	2.91211e-47	TRUE	CG32762	protein_coding	14.7852	344.086	585.536	612.435	482.307	227.377	398.543	0.953976	1.02419	5.93271	0.876863	3.55028	0	447	734	801	588	262	536	1	1	6	1	2	0
FBgn0041579	1384.32	7.01015	0.404322	6.56211e-66	3.66377e-63	TRUE	AttC	protein_coding	17.1475	4821.94	6121.1	1117.66	6610.71	3797.95	2279.02	25.5899	51.6441	14.6796	12.1433	14.8635	20.3271	6318	7739	1475	8140	4432	3088	27	51	15	14	8	18
FBgn0267130	63.9	6.95794	0.577896	1.87777e-22	3.58865e-21	TRUE	lncRNA:CR45570	ncRNA	9.7482	295.954	232.165	67.3899	288.412	113.553	148.603	0.92852	2.0583	0	0	0	1.13696	390	295	89	353	129	204	1	2	0	0	0	1
FBgn0030200	70.6437	6.92904	0.521614	2.22666e-25	5.36354e-24	TRUE	RabX2	protein_coding	10.4102	120.472	120.11	171.201	126.835	141.258	136.922	0	0	0	0	0	1.1306	158	152	226	156	164	186	0	0	0	0	0	1
FBgn0004590	914.331	6.70674	0.366171	2.25782e-73	1.85771e-70	TRUE	Eig71Ec	protein_coding	18.119	1729.08	3246.14	2798.44	3815.75	2249.39	2489.9	26.1957	48.0896	14.759	12.2435	1.85862	18.1408	2273	4117	3696	4681	2581	3402	28	47	15	14	1	16
FBgn0264896	51.457	6.59291	0.548386	8.22407e-25	1.88791e-23	TRUE	asRNA:CR44087	ncRNA	10.2851	98.569	60.9744	103.088	79.4752	87.6994	83.6659	0	0	0	0	0	0	129	77	136	98	103	113	0	0	0	0	0	0
FBgn0263770	37.922	6.58891	0.566034	3.5493e-19	5.19534e-18	TRUE	CR43687	pseudogene	8.95017	60.9572	162.157	94.2179	170.878	96.3987	91.6283	0.912624	2.08273	0	0	0	0	81	207	124	208	107	127	1	2	0	0	0	0
FBgn0013277	1463.92	6.50305	0.659447	4.00299e-23	8.08511e-22	TRUE	Hsp70Ba	protein_coding	9.90391	1997.4	7116.36	5312.65	4478.57	3129.99	3576.33	5.76383	55.0957	0	3.4403	9.28469	2.24972	2609	8969	7005	5536	3716	4804	6	55	0	4	5	2
FBgn0034052	178.012	6.4153	0.394836	9.95081e-55	2.50905e-52	TRUE	CG8299	protein_coding	15.58	679.889	778.928	287.166	718.902	255.639	404.963	1.894	8.1064	4.89486	3.47131	1.85799	6.77734	891	985	379	885	298	549	2	8	5	4	1	6
FBgn0262679	113.615	6.18718	0.526305	9.43041e-24	1.99764e-22	TRUE	CG43149	protein_coding	10.0474	55.7057	65.6381	63.6471	79.6035	79.763	74.5092	0	0	0	0	0	0	73	83	84	98	93	101	0	0	0	0	0	0
FBgn0051865	72.2581	6.15968	0.545147	1.0525e-22	2.07225e-21	TRUE	Ada1-1	protein_coding	9.8068	92.1151	87.8632	55.2265	48.8562	55.6992	61.8339	0	0	0	0	0	0	119	110	73	60	65	83	0	0	0	0	0	0
FBgn0004591	612.066	6.12743	0.499676	3.36146e-33	1.57334e-31	TRUE	Eig71Ed	protein_coding	12.0046	1185.32	2159.5	1861.36	2608.85	1433.36	1666.41	21.7105	45.0023	16.9695	1.78921	0	15.0055	1585	2764	2439	3166	1572	2319	24	43	17	2	0	13
FBgn0033508	67.5514	6.11363	0.468499	1.99062e-20	3.23151e-19	TRUE	Obp46a	protein_coding	9.26284	105.619	89.8032	109.781	75.8937	91.958	101.495	0	0	0	0	0	3.40582	139	114	145	93	105	139	0	0	0	0	0	3
FBgn0038134	33.7589	6.07499	0.598735	5.24286e-17	6.33397e-16	TRUE	wntD	protein_coding	8.38112	67.2472	173.437	37.901	120.821	121.694	81.4661	3.81165	0	0	0	0	0	88	219	50	149	143	110	4	0	0	0	0	0
FBgn0014848	29.5102	6.04846	0.576753	1.00902e-17	1.3134e-16	TRUE	Eig71Eh	protein_coding	8.57291	58.6245	89.2534	48.6671	172.639	86.7174	71.3581	0	1.04259	1.99034	0.89022	0	0	78	114	64	210	96	99	0	1	2	1	0	0
FBgn0267055	48.9398	5.93462	0.523714	3.0085e-18	4.09328e-17	TRUE	CR45499	pseudogene	8.71113	65.3266	103.173	68.8988	64.4865	83.2986	84.6528	0.931259	0	0	0	1.85868	0	86	131	91	79	95	116	1	0	0	0	1	0
FBgn0263407	29.2519	5.87801	0.576578	7.66122e-20	1.18699e-18	TRUE	lncRNA:CR43453	ncRNA	9.11787	46.5128	44.2514	37.8764	48.7821	62.8734	53.0035	0	0	0	0	0	0	61	56	50	60	73	72	0	0	0	0	0	0
FBgn0014849	28.1091	5.87797	0.533024	4.88989e-20	7.71378e-19	TRUE	Eig71Ei	protein_coding	9.16642	68.9047	79.8769	63.2986	139.859	80.9291	67.4313	3.32333	0	1.23361	1.10778	0	0	77	89	67	150	75	80	3	0	1	1	0	0
FBgn0004593	496.108	5.84396	0.376038	2.47322e-53	5.36997e-51	TRUE	Eig71Ef	protein_coding	15.3733	942.543	1614.78	1571.61	2111.85	1196.83	1368.17	11.7754	54.3848	16.9591	16.9814	3.70447	18.4504	1259	2066	2061	2564	1315	1903	13	52	17	19	2	16
FBgn0033598	216.799	5.83406	0.403474	1.37744e-45	1.58334e-43	TRUE	Cpr47Eb	protein_coding	14.1714	328.719	723.213	1066.67	510.432	373.297	836.836	4.7253	24.3595	5.8789	6.08263	3.71623	6.78145	431	915	1408	628	434	1136	5	24	6	7	2	6
FBgn0030509	37.6944	5.81704	0.622646	2.38449e-15	2.48512e-14	TRUE	CG11162	protein_coding	7.91951	6.86975	104.418	147.764	173.767	113.036	115.912	0.948301	0	1.95682	0	1.85789	0	9	132	195	214	132	157	1	0	2	0	1	0
FBgn0039091	197.436	5.8108	0.584582	1.23066e-21	2.21902e-20	TRUE	CG10182	protein_coding	9.55544	81.1451	714.038	1065.54	711.984	418.809	524.718	2.8809	22.0445	2.92001	2.58079	0	2.24995	106	900	1405	880	497	705	3	22	3	3	0	2
FBgn0036951	30.371	5.74563	0.742499	5.80781e-12	4.3904e-11	TRUE	CG7017	protein_coding	6.88429	1.59704	272.34	51.5982	74.3833	54.7175	89.8921	0	1.05001	0	0	0	0	2	333	73	90	63	116	0	1	0	0	0	0
FBgn0033927	19.2861	5.64327	0.552523	1.07129e-16	1.26492e-15	TRUE	CR10102	pseudogene	8.2966	42.8193	51.5083	79.6055	65.6318	39.8642	63.7985	1.9108	2.01225	0	0	0	0	56	65	105	81	47	86	2	2	0	0	0	0
FBgn0052283	27.5317	5.62212	0.670941	6.7155e-13	5.5371e-12	TRUE	Drsl3	protein_coding	7.18511	13.951	45.8077	36.4543	82.9347	49.5145	251.509	0.888656	0	0	0	1.837	0	19	59	47	100	53	352	1	0	0	0	1	0
FBgn0032490	8.33654	5.61257	0.675717	4.80479e-14	4.43147e-13	TRUE	CG16813	protein_coding	7.53712	12.9009	33.1253	33.0262	28.4108	24.4709	18.1236	0	0	0	0	0	0	15	44	50	37	26	24	0	0	0	0	0	0
FBgn0035623	272.547	5.60601	0.291222	1.35772e-80	1.41501e-77	TRUE	mthl2	protein_coding	19.012	875.627	1054.24	796.279	733.966	565.897	648.745	16.3146	9.02283	20.4455	20.6547	1.85702	12.3771	1144	1329	1050	907	671	872	17	9	21	24	1	11
FBgn0038484	98.4789	5.59025	0.498291	4.00948e-27	1.11729e-25	TRUE	CG5246	protein_coding	10.786	212.388	434.673	157.657	611.586	127.824	196.126	2.85572	6.05451	0.976886	0.865006	11.1457	4.51143	278	549	208	754	150	265	3	6	1	1	6	4
FBgn0040984	18.2645	5.56289	0.660933	9.19243e-13	7.48465e-12	TRUE	CG4440	protein_coding	7.14209	8.29859	50.6748	78.2785	85.225	64.2945	33.7549	2.22903	0	0	0	0	0	9	59	83	85	56	43	2	0	0	0	0	0
FBgn0033593	30.8202	5.55119	0.607277	8.82744e-15	8.69562e-14	TRUE	Listericin	protein_coding	7.7551	46.6466	153.522	107.15	74.7702	63.1016	85.1161	0	2.08327	0	0	1.85533	1.14736	62	196	141	91	70	118	0	2	0	0	1	1
FBgn0265740	18.3849	5.54973	0.583043	4.99325e-18	6.68318e-17	TRUE	lncRNA:CR44547	ncRNA	8.65353	35.726	30.7315	29.5277	29.3675	46.3412	32.8837	0	0	0	0	0	0	47	39	39	36	53	45	0	0	0	0	0	0
FBgn0266648	26.2676	5.50938	0.586539	9.8273e-18	1.28453e-16	TRUE	lncRNA:CR45155	ncRNA	8.57595	39.5324	22.0662	41.6417	45.6765	44.5667	33.6239	0	0	0	0	0	0	52	28	55	56	51	46	0	0	0	0	0	0
FBgn0037724	97.6303	5.37185	0.624233	1.64271e-16	1.89664e-15	TRUE	Fst	protein_coding	8.24565	20.6349	888.665	166.769	211.611	86.7514	333.369	2.86006	7.055	1.95254	1.72837	3.71503	1.12736	27	1122	220	261	102	450	3	7	2	2	2	1
FBgn0034552	1089.4	5.34841	0.338165	5.653e-56	1.60679e-53	TRUE	CG17999	protein_coding	15.7623	5183.64	2991.78	3338.71	2495.26	1788.43	3110.87	64.1891	99.3864	88.6601	41.3534	20.4286	74.2994	6775	3773	4403	3082	2116	4186	67	99	91	48	11	66
FBgn0004431	291.249	5.34195	0.28437	2.36774e-77	2.17734e-74	TRUE	LysX	protein_coding	18.6164	1257.58	765.815	1003.29	852.877	480.4	526.046	14.8614	26.751	11.8426	16.6935	33.4548	6.82062	1657	973	1325	1044	546	722	16	26	12	19	18	6
FBgn0036440	296.483	5.32461	0.235391	4.04932e-108	7.91288e-105	TRUE	CG17177	protein_coding	22.0888	386.279	305.079	340.171	371.651	384.753	303.79	9.31298	9.98372	3.72495	12.2098	6.83342	5.89213	462	351	416	408	420	368	11	9	6	17	3	11
FBgn0264867	16.1159	5.31816	0.573698	1.34469e-15	1.43688e-14	TRUE	lncRNA:CR44058	ncRNA	7.99043	37.1228	28.0862	31.0968	26.0807	39.0015	29.1491	0	0	1.29484	0	0	0	38	32	41	28	35	39	0	0	1	0	0	0
FBgn0034514	54.7182	5.31451	0.367769	6.55029e-43	5.81822e-41	TRUE	CG13427	protein_coding	13.7318	141.242	170.648	155.935	206.393	102.168	187.34	6.37141	3.129	5.97276	3.56248	0	0	188	218	205	251	113	260	7	3	6	4	0	0
FBgn0265533	21.4484	5.28135	0.58733	1.07422e-16	1.26741e-15	TRUE	CR44383	pseudogene	8.29628	27.9723	17.0081	25.6388	36.7853	34.5359	43.2604	0	0	0	0	0	0	40	21	36	40	39	60	0	0	0	0	0	0
FBgn0004594	435.607	5.25767	0.505471	1.97213e-24	4.36072e-23	TRUE	Eig71Eg	protein_coding	10.2005	778.153	1499.84	1449.77	1887.31	990.036	1094.86	10.8498	79.5642	10.9824	6.26461	3.70234	25.4052	1041	1920	1899	2290	1085	1524	12	76	11	7	2	22
FBgn0034329	881.963	5.22044	0.408084	5.35203e-37	3.20568e-35	TRUE	IM1	protein_coding	12.7078	1126.87	1783.6	4008.91	2938	3525.97	2092.89	41.7853	57.9773	28.181	41.7322	137.801	21.1309	1534	2297	5171	3543	3776	2929	47	55	28	46	75	18
FBgn0036467	24.2452	5.20822	0.516282	5.01209e-18	6.70265e-17	TRUE	CG12310	protein_coding	8.6531	99.3327	95.9626	42.4087	67.039	52.0785	43.6519	1.85318	2.06142	0	0.879983	0	1.13793	131	122	56	82	59	60	2	2	0	1	0	1
FBgn0052602	14.8369	5.0974	0.618045	1.41817e-11	1.03745e-10	TRUE	Muc12Ea	protein_coding	6.75604	34.4887	52.4254	61.4489	71.8985	11.72	23.1497	0.965321	0	0	1.71493	0	0	45	66	81	89	14	31	1	0	0	2	0	0
FBgn0003411	26.2202	5.08404	0.520817	5.985e-18	7.91569e-17	TRUE	sisA	protein_coding	8.63283	70.1402	69.5275	113.623	55.2949	68.0915	52.2482	0.943545	1.0163	0	0.869845	0	4.52315	92	88	150	68	79	71	1	1	0	1	0	4
FBgn0040607	239.75	5.01148	0.585691	4.39236e-17	5.35614e-16	TRUE	CG14244	protein_coding	8.40192	28.7035	937.867	970.606	782.096	650.078	792.731	3.67437	51.851	2.97452	4.42504	3.71443	3.42801	38	1195	1280	954	728	1095	4	50	3	5	2	3
FBgn0029770	601.693	4.9633	0.434	1.29953e-29	4.43572e-28	TRUE	CG4151	protein_coding	11.3009	704.89	3072.73	2030.57	1621.83	1089.83	2043.71	28.0199	106.381	25.9173	21.0816	16.3672	64.7553	840	3537	2435	1812	1147	2527	27	95	24	22	8	52
FBgn0262838	20.0214	4.94156	0.496121	5.11746e-19	7.41439e-18	TRUE	CG43202	protein_coding	8.90969	63.157	70.1459	75.1934	61.9569	46.9647	33.68	0	0	2.003	4.49806	1.84676	0	85	90	98	75	51	47	0	0	2	5	1	0
FBgn0266929	12.9401	4.88891	0.55249	3.57155e-13	3.05772e-12	TRUE	lncRNA:CR45380	ncRNA	7.27088	27.0476	57.7241	33.5975	43.4996	27.8237	31.3781	0	1.0575	0	1.85134	1.80888	0	38	75	42	52	29	44	0	1	0	2	1	0
FBgn0003996	2140.47	4.88497	0.135759	2.28803e-282	3.57688e-278	TRUE	w	protein_coding	35.908	2629.05	2375.6	2240.35	2359.77	2476.95	2281.11	80.7003	54.0904	83.6919	122.124	70.5634	56.2416	3434	2994	2954	2917	2941	3064	84	54	86	142	38	50
FBgn0033928	493.593	4.83971	0.213066	1.8686e-113	4.17312e-110	TRUE	Arc2	protein_coding	22.6371	780.772	1626.99	1332.11	1785.02	1142.21	1270.19	36.9654	66.8303	48.9307	35.5612	20.4372	48.5585	1023	2057	1758	2198	1333	1721	39	66	50	41	11	43
FBgn0266261	18.6606	4.82183	0.793608	2.97122e-08	1.50662e-07	TRUE	CG44956	protein_coding	5.54312	3.04639	198.903	3.02919	25.2385	90.995	14.6782	0	0	0	0	0	0	4	252	4	31	105	20	0	0	0	0	0	0
FBgn0033926	43736.6	4.79082	0.174847	3.03343e-165	1.58072e-161	TRUE	Arc1	protein_coding	27.3963	111039	128857	128463	140159	98994.4	139889	4126.51	7287.87	3916.89	3566.43	2865.24	4182.06	145034	162398	169384	173259	117549	187893	4295	7276	4025	4147	1543	3718
FBgn0267218	9.85966	4.7757	0.627156	4.05014e-13	3.44482e-12	TRUE	lncRNA:CR45658	ncRNA	7.25388	22.889	11.8603	21.9723	16.2489	28.3287	11.0607	0	0	0	0	0	0	30	15	29	20	33	15	0	0	0	0	0	0
FBgn0267692	41.611	4.77474	0.464489	5.69095e-17	6.8647e-16	TRUE	lncRNA:CR46028	ncRNA	8.37146	51.9826	45.9502	52.3087	38.0939	46.7108	40.0331	1.90884	0	0	0	3.71487	1.12699	68	58	69	47	55	54	2	0	0	0	2	1
FBgn0040736	2027.37	4.7551	0.500308	3.84919e-21	6.64177e-20	TRUE	IM3	protein_coding	9.43664	1906.01	5001.24	6817.77	6245.19	10222	4741.37	118.344	283.423	113.134	82.6592	202.177	89.9643	2627	6321	8171	7178	10098	6424	145	278	113	94	114	78
FBgn0266456	330.118	4.74926	0.477356	1.1083e-22	2.17356e-21	TRUE	CG45081	protein_coding	9.80159	633.348	1126.87	874.108	1339.83	807.359	993.231	23.9836	73.0489	16.5879	28.6198	0	15.35	838	1443	1185	1694	912	1386	25	63	15	31	0	12
FBgn0266405	57.9919	4.74783	0.482627	1.95549e-21	3.46208e-20	TRUE	lncRNA:CR45045	ncRNA	9.50737	280.925	144.269	71.1224	258.906	92.7617	165.541	6.67178	6.25997	1.04275	0	10.2947	5.2781	434	192	81	299	92	230	8	6	1	0	6	4
FBgn0267643	27.0127	4.74776	0.525198	1.21192e-12	9.7811e-12	TRUE	lncRNA:CR45981	ncRNA	7.10401	29.7669	23.7298	39.403	36.5429	43.6894	38.384	0	0	0.978529	0.867232	0	1.1292	39	30	52	45	51	52	0	0	1	1	0	1
FBgn0036230	231.507	4.73101	0.543969	1.02744e-17	1.33627e-16	TRUE	CG11570	protein_coding	8.57083	45.8044	967.58	890.419	837.039	584.436	669.879	2.84655	50.5848	9.78174	3.46702	22.2942	6.77346	60	1223	1175	1031	683	907	3	50	10	4	12	6
FBgn0042206	291.803	4.72559	0.293779	1.2821e-57	4.09042e-55	TRUE	GstD10	protein_coding	15.9998	359.413	1216.07	768.971	1181.49	766.078	645.327	15.5525	30.5629	36.4066	20.9374	14.9355	47.6787	470	1542	1018	1456	896	876	17	30	37	24	8	42
FBgn0038611	23.9931	4.68913	0.561469	1.11517e-14	1.08687e-13	TRUE	CG14309	protein_coding	7.72538	25.2757	123.834	84.1936	96.2134	51.249	38.016	2.88775	5.00063	1.94475	0	0	0	33	156	111	119	61	51	3	5	2	0	0	0
FBgn0266797	13.8324	4.67883	0.617851	3.84925e-13	3.28289e-12	TRUE	lncRNA:CR45259	ncRNA	7.26076	19.6039	12.5453	18.2153	19.6958	25.1156	19.5115	0	0	0	0	0	0	26	16	24	24	28	27	0	0	0	0	0	0
FBgn0037666	4.62956	4.67	0.715957	2.26512e-09	1.31442e-08	TRUE	CR16735	pseudogene	5.97755	20.6321	22.174	7.58013	17.029	8.51145	7.4054	0	0	0	0	0	0	27	28	10	21	10	10	0	0	0	0	0	0
FBgn0035468	78.6334	4.66604	0.401175	4.26788e-30	1.52677e-28	TRUE	Gr63a	protein_coding	11.3982	80.3075	335.291	319.204	267.299	193.945	146.252	3.82604	7.03634	8.77441	6.03677	14.8582	4.5051	105	423	421	330	229	197	4	7	9	7	8	4
FBgn0053470	4370.86	4.64842	0.455743	3.08718e-24	6.74048e-23	TRUE	CG33470	protein_coding	10.1569	2976.33	10487.3	14472.2	15200.2	21337.2	10012.8	87.6241	1052.95	154.997	144.062	568.012	204.155	3711	12537	18122	17703	23279	13128	101	973	179	161	315	184
FBgn0040972	66.9903	4.57421	0.584175	2.86859e-14	2.70638e-13	TRUE	CG16978	protein_coding	7.60412	108.293	227.236	218.501	202.816	180.026	214.714	1.80625	11.5223	0	0	12.9538	3.46742	145	291	286	246	197	299	2	11	0	0	7	3
FBgn0036181	133.871	4.56935	0.270788	1.57329e-62	6.83202e-60	TRUE	Muc68Ca	protein_coding	16.6891	226.088	469.435	487.796	388.586	240.288	357.679	11.5828	17.9629	18.454	16.2928	11.1393	6.73971	295	591	643	481	287	479	12	18	19	19	6	6
FBgn0004878	265.833	4.56672	0.258952	7.0238e-69	4.99105e-66	TRUE	cas	protein_coding	17.5406	801.49	778.935	443.499	783.204	474.678	525.884	34.3582	18.4904	19.5266	7.41797	35.8346	34.5081	1048	970	591	964	555	703	37	19	20	8	20	31
FBgn0039759	301.442	4.56083	0.396008	2.3515e-30	8.69054e-29	TRUE	CG9733	protein_coding	11.45	132.281	1031.09	1596.59	789.79	441.212	1082.93	38.2714	36.2006	18.5075	29.3323	26.0106	25.892	173	1301	2106	975	521	1459	40	36	19	34	14	23
FBgn0003378	4.4812	4.55847	0.708253	2.1445e-09	1.2486e-08	TRUE	Sgs8	protein_coding	5.98647	10.2742	11.6438	9.31192	29.8608	7.47845	10.0021	0	0	0	0	0	0	14	15	12	36	8	14	0	0	0	0	0	0
FBgn0003961	24.1854	4.53895	0.665803	3.06589e-10	1.96109e-09	TRUE	Uro	protein_coding	6.29541	6.11566	124.384	25.0173	109.417	26.3266	120.102	0	0	0	2.59067	5.57229	0	8	157	33	135	31	162	0	0	0	3	3	0
FBgn0051244	715.814	4.52851	0.257812	1.2679e-68	8.25879e-66	TRUE	CG31244	protein_coding	17.507	889.468	740.449	866.408	853.077	999.265	738.311	26.6777	8.06677	32.2251	63.1093	44.5814	27.0614	1164	935	1143	1052	1174	997	28	8	33	73	24	24
FBgn0035412	12.7934	4.5274	0.655682	2.04491e-09	1.19373e-08	TRUE	CG14957	protein_coding	5.9942	9.73814	89.1236	22.8668	25.5266	12.7293	61.8505	0.906495	2.0909	0	0	0	1.15243	13	114	30	31	14	86	1	2	0	0	0	1
FBgn0034328	548.042	4.47888	0.326153	1.3391e-42	1.15658e-40	TRUE	IM23	protein_coding	13.6799	643.16	1021.66	1860.24	1624.08	2506.17	1782.05	36.6231	99.7673	38.7233	39.0286	105.817	56.095	853	1303	2451	1979	2794	2466	40	96	39	44	57	49
FBgn0035315	25.7099	4.47525	0.460225	1.9163e-16	2.19952e-15	TRUE	CG8960	protein_coding	8.22721	38.0134	48.9038	57.8843	35.5132	55.0008	60.282	1.51325	0	4.76406	1.41096	1.59419	0	58	72	89	51	73	95	1	0	3	1	1	0
FBgn0036618	728.008	4.46262	0.661196	9.72671e-11	6.55421e-10	TRUE	Cpr72Eb	protein_coding	6.47114	10.6768	5786.05	1873.46	1831.39	2432.61	846.974	23.6189	177.668	22.5388	25.2046	16.7233	25.998	14	7321	2473	2253	2827	1150	25	175	23	29	9	23
FBgn0040734	29.5965	4.45857	0.359908	3.31389e-32	1.42716e-30	TRUE	CG15065	protein_coding	11.8138	66.5973	66.2218	82.9924	86.4589	108.079	100.17	3.22981	3.05344	2.08136	3.24679	4.93345	5.67334	107	90	90	95	105	138	4	3	2	3	3	4
FBgn0063493	2103.11	4.45589	0.349768	4.09107e-37	2.45984e-35	TRUE	GstE7	protein_coding	12.7288	6131.02	7724.28	3984.99	7894.06	3094.36	4488.52	188.586	151.507	120.631	80.0578	585.353	175.303	8043	9778	5261	9706	3587	6102	200	149	123	92	315	155
FBgn0005660	811.109	4.45182	0.175674	2.71586e-141	1.06143e-137	TRUE	Ets21C	protein_coding	25.3064	1897.41	3017.49	1962.4	2864.35	1493.45	1847.46	95.7341	113.852	78.7138	108.864	97.946	81.8238	2599	4178	2894	3955	1944	2627	93	98	88	129	58	76
FBgn0262616	18.1731	4.40089	0.551614	3.23331e-11	2.28253e-10	TRUE	CR43142	pseudogene	6.63553	17.448	11.8025	42.4052	20.4308	21.1494	20.386	0	0	0.987383	0.879275	0	0	23	15	56	25	24	28	0	0	1	1	0	0
FBgn0010042	127.09	4.35612	0.43846	1.08494e-22	2.13076e-21	TRUE	GstD6	protein_coding	9.80374	213.472	557.806	314.359	632.63	233.57	234.02	10.3795	25.4066	19.609	10.4378	0	16.9616	280	706	415	778	271	318	11	25	20	12	0	15
FBgn0028855	250.773	4.32967	0.438471	1.43268e-22	2.77191e-21	TRUE	CG15282	protein_coding	9.77563	404.822	752.052	1333.71	648.506	431.745	750.733	24.8385	37.7182	42.4127	23.5297	0	41.5661	469	828	1502	679	409	912	25	34	36	25	0	35
FBgn0262986	51.4252	4.3292	0.579543	4.17095e-13	3.53795e-12	TRUE	CG43294	protein_coding	7.24989	4.86364	207.475	217.426	155.069	112.285	173.67	2.97901	10.3579	4.21162	0	3.43754	5.24404	6	261	279	185	128	236	3	10	4	0	2	5
FBgn0053542	60.6394	4.31611	0.342579	4.59991e-35	2.46269e-33	TRUE	upd3	protein_coding	12.3546	102.58	179.304	194.149	203.075	138.193	203.192	7.68264	16.032	0.973324	10.323	7.42786	2.24993	134	226	256	251	164	273	8	16	1	12	4	2
FBgn0259950	20.3031	4.31297	0.454635	5.51429e-19	7.94515e-18	TRUE	CG42460	protein_coding	8.90141	37.0468	84.657	51.9546	77.9393	45.2773	52.1754	3.12589	3.62244	2.30308	5.16211	0	0	43	94	59	82	43	63	3	3	2	5	0	0
FBgn0030904	76.3576	4.30679	0.405865	1.49852e-25	3.65466e-24	TRUE	upd2	protein_coding	10.4479	189.812	236.378	229.78	229.835	136.664	203.075	5.75679	19.0516	2.92107	6.02513	1.85704	13.5031	248	298	303	284	162	273	6	19	3	7	1	12
FBgn0038866	71.3936	4.30391	0.355931	1.31007e-32	5.85152e-31	TRUE	CG5810	protein_coding	11.8915	89.4693	187.823	225.933	245.485	218.726	175.858	14.3363	16.0933	3.90102	3.45129	5.57199	5.63268	117	237	298	303	258	237	15	16	4	4	3	5
FBgn0035550	12.9607	4.29719	0.647834	3.01417e-09	1.72413e-08	TRUE	CG11349	protein_coding	5.93082	3.06145	27.7623	41.7092	38.0365	68.3358	48.3499	0.959424	2.0055	1.94741	0	0	1.12528	4	35	55	47	81	65	1	2	2	0	0	1
FBgn0001230	23607.2	4.29051	0.370331	5.8883e-31	2.26172e-29	TRUE	Hsp68	protein_coding	11.5694	25424.8	99007.6	77761.2	71833.8	57254.3	58285.4	1671.03	7983.7	1483.33	1625.83	2662.88	1334.2	33212	124791	102534	88787	67949	78308	1740	7968	1524	1890	1434	1186
FBgn0053468	25.7215	4.27604	0.339438	6.74622e-33	3.04808e-31	TRUE	CG33468	protein_coding	11.9468	73.7267	79.5808	65.1128	79.9515	64.7278	69.4077	2.79895	7.17779	2.95521	3.50432	0	2.26974	97	101	86	98	74	95	3	7	3	4	0	2
FBgn0013275	4474.35	4.25916	0.498856	2.03148e-17	2.55086e-16	TRUE	Hsp70Aa	protein_coding	8.49198	7250.32	16936.6	12476.7	13483.6	12203.2	12701.6	287.279	1491.39	141.103	472.132	267.397	134.977	9470	21345	16451	16668	14491	17060	299	1489	145	549	144	120
FBgn0263617	57.0276	4.25112	0.564167	1.72712e-13	1.52543e-12	TRUE	lncRNA:CR43626	ncRNA	7.36838	38.3442	175.563	154.192	186.747	192.165	192.141	1.24355	24.1312	7.61085	6.72607	0	4.27009	77	207	238	233	208	289	3	4	2	2	0	10
FBgn0039495	244.264	4.23177	0.553152	3.30013e-14	3.0967e-13	TRUE	CG5909	protein_coding	7.58597	549.899	841.768	685.411	511.938	547.201	891.544	20.0841	41.2172	15.5998	15.5244	31.5738	13.5158	719	1062	904	632	646	1201	21	41	16	18	17	12
FBgn0262846	73.9324	4.2235	0.428167	2.68815e-22	5.05703e-21	TRUE	CG43210	protein_coding	9.7117	224.319	248.848	208.066	221.736	131.025	225.681	1.50238	25.8955	13.3228	5.39967	4.18072	4.15497	279	306	263	263	145	296	2	27	12	7	2	5
FBgn0263130	19.5032	4.22118	0.554897	1.45799e-10	9.65389e-10	TRUE	lncRNA:CR43372	ncRNA	6.40971	19.8951	15.0676	27.2989	13.7617	24.4959	18.5846	0	2.00705	0	0	0	0	26	19	36	17	29	25	0	2	0	0	0	0
FBgn0264479	5.43106	4.21334	0.679079	1.05532e-08	5.65382e-08	TRUE	lncRNA:CR43887	ncRNA	5.72159	4.54545	7.86133	17.4219	19.6351	25.6756	12.3515	0	0	0	0	0	1.13907	6	10	23	24	29	17	0	0	0	0	0	1
FBgn0036612	20153.9	4.21157	0.260164	6.60522e-59	2.3468e-56	TRUE	CG4998	protein_coding	16.1834	70159.1	82777.2	45904.6	51563.9	33251.9	39573.9	1789.12	3149.76	1811.91	2653.03	2856.73	3852.22	90834	103224	59964	63168	39229	52574	1859	3141	1870	3081	1548	3440
FBgn0085309	118.014	4.21054	0.533382	1.31942e-14	1.27403e-13	TRUE	CG34280	protein_coding	7.70393	144.919	471.537	446.162	458.442	241.897	281.937	12.5152	36.8247	2.00748	6.32047	0	19.8375	196	606	579	554	261	394	14	35	2	7	0	17
FBgn0010388	1117.23	4.20834	0.247351	8.62763e-65	4.65089e-62	TRUE	Dro	protein_coding	16.9971	1330.79	3296.54	2951.8	3032.35	3934.29	3390.1	161.976	191.592	133.462	88.4887	101.266	225.645	1828	4264	3796	3675	4199	4745	182	181	133	97	55	191
FBgn0033594	16.0313	4.2051	0.60737	3.46718e-10	2.20425e-09	TRUE	CG13226	protein_coding	6.2763	6.10775	36.396	65.9304	70.6258	26.5147	27.333	0	1.01142	0.978036	0	5.57348	0	8	46	87	87	31	37	0	1	1	0	3	0
FBgn0054025	29.5105	4.20127	0.431736	2.48377e-18	3.39916e-17	TRUE	CG34025	protein_coding	8.73283	42.8018	30.1	40.1772	39.7235	56.9574	42.2366	0	5.03783	0.976126	2.59196	0	0	56	38	53	49	67	57	0	5	1	3	0	0
FBgn0261538	355.194	4.18063	0.400513	2.96253e-25	7.0276e-24	TRUE	CG42662	protein_coding	10.383	354.965	1083.62	1044.19	1287.1	1424.86	812.304	15.9103	125.495	20.512	23.0811	61.8215	28.6697	423	1195	1198	1358	1375	973	20	120	21	27	30	26
FBgn0041581	810.292	4.17665	0.59611	1.10604e-11	8.15599e-11	TRUE	AttB	protein_coding	6.79198	694.512	3009.29	3046.08	2656.57	2280.1	2386.49	33.6043	366.03	25.2902	28.5661	7.63005	28.6477	907	3825	4045	3259	2670	3256	36	356	26	32	4	26
FBgn0050340	27.4984	4.17598	0.405629	1.69494e-22	3.25517e-21	TRUE	CG30340	protein_coding	9.75859	68.0307	83.9711	65.953	94.0283	41.6336	37.8006	3.81635	1.00723	2.92788	3.45506	7.42984	0	89	106	87	116	49	51	4	1	3	4	4	0
FBgn0025583	946.769	4.16629	0.667476	1.00301e-09	6.07757e-09	TRUE	IM2	protein_coding	6.10893	942.165	2236.67	3185.75	2865.65	4561.45	2480.19	28.5136	131.676	35.1857	24.4454	189.488	24.5899	1279	2878	4120	3459	4900	3469	32	125	35	27	103	21
FBgn0032489	15.1917	4.16606	0.594332	1.08743e-10	7.29603e-10	TRUE	CG15480	protein_coding	6.45427	5.32691	56.7879	71.9334	48.0759	41.7604	31.4973	1.8736	0	1.96677	2.62142	1.8586	0	7	72	95	59	48	43	2	0	2	3	1	0
FBgn0085194	330.624	4.15726	0.374019	2.1605e-28	6.7281e-27	TRUE	CG34165	protein_coding	11.0513	1160.95	1021.35	906.758	1028.78	584.293	952.034	44.718	33.6345	71.5585	44.5742	5.20949	70.0362	1551	1359	1264	1344	710	1384	50	37	75	52	4	61
FBgn0264439	24.4913	4.1238	0.566471	3.17459e-12	2.47153e-11	TRUE	lncRNA:CR43857	ncRNA	6.96977	9.18433	75.4376	96.4665	94.0531	55.3364	77.1661	0.819016	7.76914	1.67345	0	0	3.86567	11	95	131	128	67	104	1	9	2	0	0	4
FBgn0267160	373.889	4.12237	0.493462	3.83392e-17	4.70453e-16	TRUE	asRNA:CR45600	ncRNA	8.41787	542.197	429.385	345.104	384.119	337.181	331.568	1.9239	15.0098	2.91793	1.71869	66.8459	8.99529	708	541	455	475	401	445	2	15	3	2	36	8
FBgn0000278	185.984	4.11166	0.502021	5.62439e-16	6.17459e-15	TRUE	CecB	protein_coding	8.09719	302.746	453.521	701.816	643.789	582.392	459.685	9.97634	90.9269	8.97316	5.35746	1.85283	13.8243	404	580	921	782	641	639	11	87	9	6	1	12
FBgn0267048	38.9124	4.09703	0.670438	1.50512e-09	8.96361e-09	TRUE	CG45492	protein_coding	6.04382	98.8859	100.921	13.6287	92.1179	74.9659	79.7684	2.80624	0	0	0	7.43457	0	130	128	18	113	86	109	3	0	0	0	4	0
FBgn0022700	57.5375	4.08768	0.516872	6.32095e-15	6.33838e-14	TRUE	Cht4	protein_coding	7.79737	34.4177	191.03	118.28	174.148	178.694	187.829	3.82614	8.04137	0.974925	0.862381	24.1445	1.12627	45	241	156	215	211	253	4	8	1	1	13	1
FBgn0267237	4.34156	4.07999	0.711675	1.50516e-07	6.95133e-07	TRUE	lncRNA:CR45677	ncRNA	5.25193	3.01253	10.1879	9.87286	27.9207	10.7925	12.9947	0	1.04055	0	0	0	0	4	13	13	34	12	18	0	1	0	0	0	0
FBgn0036419	86.0302	4.07445	0.362465	1.03035e-28	3.29397e-27	TRUE	CG13482	protein_coding	11.1176	71.262	250.1	293.848	277.19	159.875	219.651	10.1871	15.4665	9.88126	7.0421	14.8672	7.96738	94	318	388	339	181	302	11	15	10	8	8	7
FBgn0260719	5.25435	4.06988	0.698212	1.06219e-08	5.68669e-08	TRUE	CR42546	pseudogene	5.72049	6.09773	15.7983	6.05958	22.7749	6.9038	11.7672	0	0	0	0	0	0	8	20	8	28	8	16	0	0	0	0	0	0
FBgn0036575	25.2608	4.06358	0.363789	1.35684e-26	3.60814e-25	TRUE	CG5157	protein_coding	10.6733	59.6474	96.6874	60.6536	81.8264	48.3178	59.3648	5.73502	5.02879	1.95044	2.58833	1.85732	3.37952	78	122	80	101	57	80	6	5	2	3	1	3
FBgn0266854	29.2213	4.0569	0.399543	1.02878e-22	2.02811e-21	TRUE	CR45315	pseudogene	9.8091	51.4463	109.97	75.7788	105.639	72.012	74.7033	7.37311	6.20797	0	6.18145	1.85784	2.28148	68	140	100	129	81	103	8	6	0	7	1	2
FBgn0033592	291.71	4.04465	0.669233	2.89613e-09	1.66026e-08	TRUE	CG13215	protein_coding	5.93738	37.2574	632.117	1534.68	1069.98	851.417	811.621	6.53917	111.659	3.93815	2.62612	11.152	5.67185	49	802	2027	1312	975	1110	7	109	4	3	6	5
FBgn0032049	10.5738	4.04385	0.768214	1.79488e-06	7.02188e-06	TRUE	Bace	protein_coding	4.77525	0	16.884	19.3328	64.0452	22.6515	61.6261	2.0328	0	0	0	0	0	0	20	25	75	25	79	2	0	0	0	0	0
FBgn0263328	9.68783	4.03383	0.640715	3.55673e-10	2.2575e-09	TRUE	lncRNA:CR43409	ncRNA	6.27234	9.02337	13.3122	13.6838	6.57538	11.7327	13.6992	0	0	0	0	0	0	12	17	18	8	13	19	0	0	0	0	0	0
FBgn0036024	21.573	4.03113	0.640482	2.07933e-09	1.21291e-08	TRUE	CG18180	protein_coding	5.99149	51.8984	18.1918	18.9434	28.4242	16.2812	213.294	0	2.02521	0	2.60209	5.57379	1.12928	68	23	25	35	19	289	0	2	0	3	3	1
FBgn0036949	3.08976	3.99976	0.745332	5.97475e-07	2.52509e-06	TRUE	CG7290	protein_coding	4.99203	1.66965	6.05628	8.27733	15.0383	9.25894	14.0847	0	0	0	0	0	0	2	7	10	17	10	20	0	0	0	0	0	0
FBgn0010041	1185.73	3.99277	0.221355	1.31551e-72	1.02827e-69	TRUE	GstD5	protein_coding	18.0217	3651.78	4126.71	2669.11	4291.32	2046.49	2932.1	235.525	256.606	203.727	185.854	81.7555	205.65	4787	5220	3523	5281	2382	3978	249	253	208	214	44	182
FBgn0038241	2.74694	3.99174	0.730401	4.78716e-07	2.05485e-06	TRUE	CG8087	protein_coding	5.03465	6.79648	10.9856	14.4096	7.37924	6.25528	3.6187	0	0	0	0	0	0	9	14	19	9	7	5	0	0	0	0	0	0
FBgn0000277	132.922	3.97584	0.558821	2.12969e-12	1.67979e-11	TRUE	CecA2	protein_coding	7.02572	188.218	362.282	417.575	363.516	558.314	304.26	3.5475	73.8381	6.04592	1.81815	1.83479	3.5318	257	467	537	438	596	426	4	70	6	2	1	3
FBgn0033327	11.1788	3.96624	0.671423	4.80847e-08	2.38109e-07	TRUE	PGRP-SC1b	protein_coding	5.45825	43.1007	21.7017	27.4767	42.0784	34.2622	19.1039	2.71419	0	0	2.33478	0	0	41	20	29	44	29	19	2	0	0	7	0	0
FBgn0085483	664.437	3.93841	0.402989	2.29029e-22	4.3294e-21	TRUE	CG34454	protein_coding	9.72801	499.3	2383.31	2389.49	2229.92	1817.66	1857.5	63.4192	292.324	51.2305	51.7017	44.6083	102.153	657	3025	3156	2733	2077	2543	68	285	52	59	24	90
FBgn0030929	30.9127	3.93786	0.661575	6.77658e-09	3.7276e-08	TRUE	CG15043	protein_coding	5.79637	17.1278	77.4658	59.6502	51.1766	36.0155	107.14	0.999032	1.08494	0	2.7836	0	3.61326	24	98	75	60	40	141	1	1	0	3	0	3
FBgn0010038	264.775	3.93682	0.285723	6.21302e-43	5.5582e-41	TRUE	GstD2	protein_coding	13.7356	440.424	1099.21	574.102	1013.85	663.003	524.667	29.1846	54.9783	32.3852	36.5849	53.8927	53.1821	578	1392	758	1246	767	714	31	54	33	42	29	47
FBgn0264989	18.9252	3.93592	0.376118	7.80422e-23	1.55221e-21	TRUE	CG44140	protein_coding	9.83695	48.0355	55.554	50.235	47.7148	37.1413	51.8456	3.63581	2.08767	1.9921	0.891499	7.41569	2.30038	64	71	66	58	41	72	4	2	2	1	4	2
FBgn0264990	18.9252	3.93592	0.376118	7.80422e-23	1.55221e-21	TRUE	CG44141	protein_coding	9.83695	48.0355	55.554	50.235	47.7148	37.1413	51.8456	3.63581	2.08767	1.9921	0.891499	7.41569	2.30038	64	71	66	58	41	72	4	2	2	1	4	2
FBgn0036349	6.759	3.91956	0.799957	9.99842e-06	3.49286e-05	TRUE	SNCF	protein_coding	4.41721	0	21.2749	13.6282	42.4215	34.1084	10.229	0	0	0	0	0	0	0	27	18	52	39	14	0	0	0	0	0	0
FBgn0037410	4730.77	3.91506	0.325294	2.69327e-33	1.26819e-31	TRUE	Osi2	protein_coding	12.0229	12938.6	16666.6	11584	14041.3	10671.3	10974.3	509.709	1387.88	644.56	769.071	183.786	1030.57	16874	20972	15240	17286	12554	14752	534	1382	660	892	99	915
FBgn0035694	15.7992	3.91062	0.524947	2.19681e-12	1.73098e-11	TRUE	CG13299	protein_coding	7.02138	91.4616	34.5437	26.533	55.7218	26.7397	29.7034	0.919848	3.10818	0	1.76842	0	6.85094	121	44	35	68	30	41	1	3	0	2	0	6
FBgn0265826	10.5035	3.87931	0.584228	7.95715e-09	4.34337e-08	TRUE	lncRNA:CR44615	ncRNA	5.76936	15.8363	9.40976	19.7319	14.7711	7.17367	20.2368	0	0	0	1.77379	0	0	21	12	26	18	8	28	0	0	0	2	0	0
FBgn0034317	4.81094	3.87536	0.698943	1.04064e-06	4.23985e-06	TRUE	CG14499	protein_coding	4.88379	2.28906	29.2576	14.396	8.12372	11.1554	16.9631	0.946778	1.01349	0	0	0	0	3	37	19	10	13	23	1	1	0	0	0	0
FBgn0266358	7.34719	3.866	0.64802	2.13744e-09	1.24496e-08	TRUE	lncRNA:CR45006	ncRNA	5.987	7.36642	6.99444	17.0113	11.5985	9.30907	4.28975	0	0	0	0	0	0	10	9	22	14	10	6	0	0	0	0	0	0
FBgn0267923	20.337	3.85912	0.455085	4.7002e-16	5.18547e-15	TRUE	lncRNA:CR46204	ncRNA	8.11901	37.4997	80.1075	43.9833	73.6527	50.6421	38.6711	3.83632	1.00304	1.9477	2.58284	9.28533	1.12539	49	101	58	91	60	52	4	1	2	3	5	1
FBgn0031701	77.5458	3.84357	0.628509	2.0907e-09	1.2191e-08	TRUE	TotM	protein_coding	5.9906	29.0765	138.932	132.165	47.5173	278.247	673.73	9.20503	3.35965	0.923194	0.822163	36.7618	2.46965	41	175	183	59	311	962	10	3	1	1	21	2
FBgn0041233	5.09955	3.84109	0.697924	1.00824e-06	4.1218e-06	TRUE	Gr59e	protein_coding	4.89002	2.29294	15.842	25.774	15.4031	12.7521	13.3376	0	2.01518	0	0	0	0	3	20	34	19	15	18	0	2	0	0	0	0
FBgn0013278	22086.6	3.84044	0.646677	4.61619e-09	2.594e-08	TRUE	Hsp70Bb	protein_coding	5.86045	26367	101345	74003.5	67851.1	45784.3	53091.1	449.609	11525.4	384.401	428.299	447.521	469.057	34440	127726	97577	83873	54361	71313	468	11506	395	498	241	417
FBgn0265885	70.222	3.83194	0.294438	2.96411e-37	1.79604e-35	TRUE	lncRNA:CR44674	ncRNA	12.7539	124.858	71.927	115.115	114.816	145.989	115.686	6.97572	1.84683	9.20208	6.14345	11.2897	10.0431	173	95	153	132	151	164	7	2	9	8	7	7
FBgn0014465	2.43086	3.82421	0.72082	4.46704e-07	1.9275e-06	TRUE	Cp7Fb	protein_coding	5.0479	5.09876	6.3338	7.59086	10.8062	7.83526	2.53383	0	0	0	0	0	0	5	4	5	10	8	6	0	0	0	0	0	0
FBgn0052865	389.548	3.8206	0.331158	1.28579e-30	4.8319e-29	TRUE	lncRNA:alphagamma-element:CR32865	ncRNA	11.5022	681.3	1734.68	801.367	1563.78	803.125	866.525	76.4392	102.617	84.8569	41.4227	14.8588	83.3703	891	2189	1057	1930	947	1168	80	102	87	48	8	74
FBgn0264786	9.07914	3.81586	0.561804	1.71108e-08	8.91048e-08	TRUE	lncRNA:CR44016	ncRNA	5.63893	19.8413	14.2354	10.608	13.808	24.0087	11.8049	0	0	2.93648	0	0	0	26	18	14	17	28	16	0	0	3	0	0	0
FBgn0051354	16091	3.81379	0.702238	1.26205e-07	5.89473e-07	TRUE	Hsp70Bbb	protein_coding	5.28427	18304.5	64910	55093.2	49432.4	44378.7	42776.3	249.783	7229.17	356.179	332.835	224.689	307.081	23909	81807	72643	61105	52692	57458	260	7217	366	387	121	273
FBgn0025885	7428.23	3.80879	0.165324	2.07928e-117	5.41755e-114	TRUE	Inos	protein_coding	23.035	23531.4	24883.3	17660.5	22354.5	12690	18791.8	1353.84	1509.06	1209.31	1291.08	1903.46	1059.99	30745	31370	23288	27623	15043	25262	1411	1505	1242	1500	1025	942
FBgn0004429	4.94655	3.79373	0.709158	1.88778e-06	7.36685e-06	TRUE	LysP	protein_coding	4.76508	1.52048	28.3708	12.114	9.78782	22.7203	9.50242	0	0	0.984753	0	1.85868	0	2	36	16	12	26	13	0	0	1	0	1	0
FBgn0051439	18.3426	3.78769	0.501038	4.85e-13	4.06324e-12	TRUE	Muc96D	protein_coding	7.22944	26.8022	74.6029	56.1261	82.4897	27.7558	31.2896	2.8852	1.00083	0	2.57839	3.7137	6.7469	35	94	74	102	33	42	3	1	0	3	2	6
FBgn0040837	536.212	3.77709	0.380259	3.471e-23	7.05619e-22	TRUE	CG8620	protein_coding	9.91816	700.707	1642.09	1594.32	1816.07	1237.82	1156.93	98.0157	44.452	34.5394	32.3107	253.111	49.3491	943	2155	2172	2313	1496	1635	102	45	35	35	134	42
FBgn0267686	13.9799	3.76799	0.534005	1.94888e-09	1.14322e-08	TRUE	lncRNA:CR46022	ncRNA	6.00201	19.7916	10.256	17.4161	22.8086	26.9324	13.9272	1.87562	0	1.96588	0	0	0	26	13	23	28	31	19	2	0	2	0	0	0
FBgn0031034	10.08	3.76252	0.535112	2.55288e-09	1.47321e-08	TRUE	CG14205	protein_coding	5.95804	18.3741	18.2493	12.893	21.0335	10.9493	22.334	0	3.00512	0	0.860053	0	0	24	23	17	26	13	30	0	3	0	1	0	0
FBgn0037677	3.91092	3.74748	0.679587	1.30327e-06	5.21075e-06	TRUE	CG12951	protein_coding	4.83925	4.57776	15.8136	9.84965	14.6241	15.4527	5.89892	0.946456	0	0.979205	0	0	0	6	20	13	18	18	8	1	0	1	0	0	0
FBgn0032835	1249.46	3.72645	0.671729	3.66052e-08	1.83413e-07	TRUE	CG16772	protein_coding	5.50649	546.89	5723.8	3919.02	3112.6	2883.34	4096.01	51.3267	311.243	33.1564	33.6753	294.869	20.2666	717	7241	5179	3844	3390	5543	54	309	34	39	159	18
FBgn0034906	2.67947	3.72206	0.746797	2.81018e-06	1.0736e-05	TRUE	CG13561	protein_coding	4.68423	1.51548	8.64861	11.3613	8.1799	10.6163	5.81447	0	0	0	0	0	0	2	11	15	10	12	8	0	0	0	0	0	0
FBgn0036023	21.572	3.71803	0.683428	3.10397e-07	1.37191e-06	TRUE	CG18179	protein_coding	5.11702	16.7869	81.4488	115.169	46.3039	49.7636	61.2187	0	13.1743	0.979026	0	0	0	22	103	152	57	58	83	0	13	1	0	0	0
FBgn0044809	52.7953	3.69846	0.373704	1.58455e-22	3.0544e-21	TRUE	TotZ	protein_coding	9.76542	211.062	141.707	126.445	155.985	83.4744	105.712	8.36803	24.6745	3.94587	3.51207	1.85862	11.3635	278	180	167	191	95	145	9	24	4	4	1	10
FBgn0040653	475.889	3.66728	0.450304	4.73608e-16	5.22138e-15	TRUE	IM4	protein_coding	8.11808	1010.85	1109.21	894.283	1776.99	1584.49	1157.51	49.9326	84.9192	18.3315	24.6813	275.591	24.0106	1327	1423	1175	2124	1731	1584	53	78	19	37	143	20
FBgn0000552	111.696	3.66431	0.790051	2.10806e-05	6.97025e-05	TRUE	Edg84A	protein_coding	4.25313	3.80459	702.706	224.884	327.601	515.249	194.074	12.1748	24.5372	0	0	1.8586	0	5	891	297	402	592	265	13	24	0	0	1	0
FBgn0035478	207.561	3.66225	0.494081	2.92188e-13	2.53062e-12	TRUE	CG10853	protein_coding	7.29795	122.298	1066.39	657.945	537.115	614.656	513.755	23.2815	98.5775	23.6594	15.7882	20.4455	32.9334	161	1354	869	658	701	704	25	96	24	18	11	29
FBgn0266856	6.23021	3.65952	0.640692	4.90708e-08	2.42684e-07	TRUE	lncRNA:CR45317	ncRNA	5.45464	12.2114	5.53663	12.8815	13.806	5.14143	10.3326	0	0	0	0	0	1.12928	16	7	17	17	6	14	0	0	0	0	0	1
FBgn0003377	5.8341	3.65525	0.68287	2.91e-06	1.10794e-05	TRUE	Sgs7	protein_coding	4.67707	12.1469	20.8025	15.14	32.5906	3.82675	16.4013	0	1.05743	3.04826	0	0	0	17	27	19	39	4	23	0	1	3	0	0	0
FBgn0265529	13.7494	3.6485	0.549061	2.84255e-08	1.44512e-07	TRUE	lncRNA:CR44379	ncRNA	5.55087	18.8265	4.67887	19.7171	17.2315	11.6406	15.904	0.910801	1.05286	0.987223	0	0	0	25	6	26	21	13	22	1	1	1	0	0	0
FBgn0001223	10068.9	3.63658	0.383232	3.15748e-21	5.51519e-20	TRUE	Hsp22	protein_coding	9.45738	12913.8	37631.8	29504.2	35943	23233.8	28260	1359.82	5832.22	1129.59	1254.7	653.162	1330.13	16755	47046	38527	43871	26911	37859	1431	5714	1162	1454	356	1176
FBgn0013276	59046.2	3.62806	0.722386	7.16304e-07	2.99331e-06	TRUE	Hsp70Ab	protein_coding	4.95689	79178.2	253317	187548	184915	124917	151211	1755.35	23359.8	1633.89	1233.23	1414.98	2011.16	103419	319253	247290	228585	148333	203099	1827	23322	1679	1434	762	1788
FBgn0037131	160.974	3.62797	0.618761	1.15991e-08	6.15539e-08	TRUE	CG14564	protein_coding	5.70552	16.7894	336.126	575.11	448.333	807.557	546.769	6.63238	86.0949	12.7239	3.47019	27.8693	1.12939	22	425	759	552	942	741	7	85	13	4	15	1
FBgn0032472	26.9013	3.6103	0.557325	1.95394e-10	1.27807e-09	TRUE	CG9928	protein_coding	6.36492	9.12521	100.947	53.6498	62.0706	68.8136	53.37	1.83922	0	1.01672	0	15.0716	3.52908	12	129	69	75	74	73	2	0	1	0	8	3
FBgn0004592	11.8774	3.58973	0.662844	4.70202e-07	2.02163e-06	TRUE	Eig71Ee	protein_coding	5.03809	9.94314	37.2557	56.1076	42.9282	27.0967	28.2135	0.956641	8.04066	0	0	0	0	13	47	74	53	32	38	1	8	0	0	0	0
FBgn0034407	189.25	3.58768	0.432367	1.9284e-16	2.21178e-15	TRUE	DptB	protein_coding	8.22645	390.424	433.907	364.049	852.953	733.993	385.862	45.601	81.2576	9.94569	8.89409	22.2629	49.3447	519	554	479	1038	814	535	50	78	10	10	12	43
FBgn0000279	393.994	3.58405	0.519678	8.81708e-12	6.5481e-11	TRUE	CecC	protein_coding	6.8246	603.285	1018.26	1518.53	1361.25	1058.1	980.63	32.2896	267.953	38.0794	20.7108	3.69131	38.3775	813	1307	1977	1647	1147	1369	36	255	38	23	2	33
FBgn0264893	2.23669	3.57459	0.756878	1.30512e-05	4.46845e-05	TRUE	lncRNA:CR44084	ncRNA	4.35924	2.23729	5.46319	9.17878	11.5492	8.24386	3.58806	0	0	0	0	0	0	3	7	12	14	9	5	0	0	0	0	0	0
FBgn0053508	41.7963	3.56453	0.329196	1.27549e-25	3.14013e-24	TRUE	ppk13	protein_coding	10.4631	57.3672	46.7703	54.5919	67.2227	45.7124	83.9104	2.87058	6.02939	0.974788	10.3464	0	3.37847	75	59	72	83	54	113	3	6	1	12	0	3
FBgn0038784	55.8169	3.54917	0.47088	1.03641e-13	9.29556e-13	TRUE	CG4362	protein_coding	7.43618	15.2554	264.021	181.825	147.095	129.801	165.059	10.4005	18.2627	8.81662	6.08093	5.57434	11.3009	20	334	240	181	151	224	11	18	9	7	3	10
FBgn0038150	11.3431	3.53039	0.47227	1.72939e-12	1.37515e-11	TRUE	yellow-e3	protein_coding	7.05473	32.8767	39.6188	28.809	43.7585	11.8792	31.1511	1.9102	2.01276	2.9266	3.45277	0	2.25352	43	50	38	54	14	42	2	2	3	4	0	2
FBgn0032966	87.3571	3.51573	0.254405	5.2262e-42	4.36904e-40	TRUE	CG1421	protein_coding	13.5805	89.1669	102.674	118.157	77.2841	128.683	121.299	4.71048	7.1229	9.81097	15.6722	0	10.1816	117	130	156	95	149	165	5	7	10	18	0	9
FBgn0267553	4399.44	3.50337	0.19789	4.13871e-70	3.08097e-67	TRUE	lncRNA:CR45893	ncRNA	17.7007	10116.2	10043.3	9839.41	12831.9	10264	12819	640.894	868.419	799.91	850.363	1333.44	1112.26	13222	12666	12976	15849	12143	17250	669	865	821	987	718	988
FBgn0039436	7.04856	3.49811	0.780603	3.97485e-05	0.000125634	TRUE	TwdlB	protein_coding	4.10894	0	10.2899	24.253	38.9471	42.6728	4.4372	1.90156	0	0	0	0	0	0	13	32	48	50	6	2	0	0	0	0	0
FBgn0033153	2528.87	3.49794	0.247936	3.54002e-45	3.89727e-43	TRUE	Gadd45	protein_coding	14.105	3323.36	7979.2	6119.55	6923.44	5292.68	5809.29	351.113	411.054	501.073	556.172	599.894	537.2	4345	10066	8071	8548	6251	7824	367	409	514	645	323	477
FBgn0265703	3.14215	3.48155	0.688181	4.0835e-07	1.77474e-06	TRUE	lncRNA:CR44510	ncRNA	5.06502	3.81099	3.94948	9.0893	7.32071	6.0416	5.8832	0	0	0	0	0	0	5	5	12	9	7	8	0	0	0	0	0	0
FBgn0063494	3098.29	3.48108	0.251104	1.12054e-43	1.08804e-41	TRUE	GstE6	protein_coding	13.8591	5268.7	10941.6	6694.89	11335.1	5573.41	6359.24	540.871	602.291	519.935	421.361	1232.07	581.448	6913	13853	8839	13934	6455	8649	574	592	530	484	663	514
FBgn0001225	27743.4	3.47398	0.405713	1.46157e-17	1.86064e-16	TRUE	Hsp26	protein_coding	8.53015	33795.9	105786	77126.5	105046	59483.3	74934.3	4405.13	18214.4	3363.7	4170.38	1304.33	3313.09	44022	132886	101189	128624	69159	100840	4636	17910	3438	4819	707	2925
FBgn0033215	45.7777	3.46989	0.497859	5.32389e-12	4.04021e-11	TRUE	Dgat2	protein_coding	6.89666	26.7591	145.792	167.545	141.816	70.4412	101.601	4.77473	14.0911	7.80477	0.863279	18.5739	0	35	184	221	175	83	137	5	14	8	1	10	0
FBgn0267248	3.53417	3.46632	0.713596	1.08149e-06	4.38571e-06	TRUE	lncRNA:CR45688	ncRNA	4.8762	6.07759	6.30116	1.51425	6.52967	16.653	4.3794	0	0	0	0	0	0	8	8	2	8	19	6	0	0	0	0	0	0
FBgn0026086	7531.18	3.46616	0.12523	1.29957e-168	1.01581e-164	TRUE	Adar	protein_coding	27.6776	12398.7	14937	16020.2	19553.5	19201.1	18799.5	1518.73	1536.51	1197.48	1197.1	1783.05	1770.42	11507	12936	14214	16032	15231	16976	2548	2582	2051	2282	1609	2531
FBgn0264508	8.77572	3.45632	0.561182	1.91011e-07	8.69054e-07	TRUE	lncRNA:CR43907	ncRNA	5.20788	15.1245	15.7061	6.0633	16.3836	11.5721	7.97382	0.92074	0	0	0.883635	1.85771	0	20	20	8	20	13	11	1	0	0	1	1	0
FBgn0010433	41.1778	3.45136	0.559538	1.67125e-09	9.90396e-09	TRUE	ato	protein_coding	6.02691	12.2299	105.357	159.196	105.38	95.1771	203.811	7.63179	14.1026	0	6.04682	3.71494	12.3986	16	133	210	130	112	275	8	14	0	7	2	11
FBgn0263660	17.9407	3.44866	0.40216	1.69361e-16	1.95396e-15	TRUE	lncRNA:CR43651	ncRNA	8.242	23.0809	54.3659	48.4793	37.5555	32.853	60.5703	0	1.20331	2.75624	3.25395	8.8353	6.36457	27	73	68	48	41	87	0	1	3	4	4	6
FBgn0034330	31.4723	3.44817	0.645151	1.06342e-07	5.01494e-07	TRUE	CG18107	protein_coding	5.31554	22.401	44.881	67.9453	88.2245	62.1427	112.337	1.70369	4.2143	1.03094	1.90933	10.5833	0	33	59	81	104	63	157	2	4	1	2	6	0
FBgn0034454	89.5041	3.44506	0.247703	1.84215e-43	1.74536e-41	TRUE	CG15120	protein_coding	13.8234	190.22	304.014	186.456	297.706	173.05	213.11	22.8393	27.2514	12.701	15.5728	27.8646	14.6633	249	384	246	367	203	288	24	27	13	18	15	13
FBgn0267695	4.23007	3.43852	0.639012	2.78088e-06	1.06292e-05	TRUE	lncRNA:CR46031	ncRNA	4.68637	7.64547	7.13112	10.6137	19.4491	14.4277	12.6075	0	2.01302	0	0	0	2.25362	10	9	14	24	17	17	0	2	0	0	0	2
FBgn0003375	10.4508	3.43681	0.622784	2.38636e-07	1.07047e-06	TRUE	Sgs5	protein_coding	5.16641	11.4097	23.653	24.986	69.2942	32.2565	13.1721	0	6.14027	1.96805	1.74933	0	0	15	30	33	85	37	18	0	6	2	2	0	0
FBgn0034582	31.6704	3.42438	0.40077	4.79923e-17	5.83863e-16	TRUE	Cht9	protein_coding	8.39151	38.9748	96.623	91.7216	121.624	81.6736	74.0705	2.85936	13.1047	2.92911	9.50746	9.28766	3.38232	51	122	121	150	96	100	3	13	3	11	5	3
FBgn0262607	526.512	3.42026	0.165829	3.0999e-94	5.38453e-91	TRUE	CG43133	protein_coding	20.5941	714.171	641.796	692.955	675.374	670.316	667	55.5729	67.0166	59.2824	54.5717	52.0355	79.6681	942	816	915	826	759	917	60	65	60	62	28	70
FBgn0264253	10.2815	3.42018	0.576183	2.38769e-08	1.22624e-07	TRUE	Send2	protein_coding	5.58127	9.91059	41.8722	21.2094	32.5286	29.314	21.3377	0	0	3.92225	0.869956	0	4.52346	13	53	28	40	34	29	0	0	4	1	0	4
FBgn0264845	2.48367	3.41571	0.724012	1.12723e-05	3.90212e-05	TRUE	Tep5Psi	pseudogene	4.39121	3.06416	10.3211	3.79265	5.65854	7.55511	11.1858	0	0.999607	0	0	0	0	4	13	5	7	9	15	0	1	0	0	0	0
FBgn0037181	1286.95	3.40876	0.281364	1.00844e-33	4.86573e-32	TRUE	CG11370	protein_coding	12.1038	3371	3624.43	3381.66	3253.16	3247.2	3566.4	225.591	668.329	277.562	231.608	145.072	234.672	4404	4579	4464	4018	3830	4808	236	664	284	268	78	208
FBgn0267046	119.935	3.40816	0.270308	4.91885e-36	2.81672e-34	TRUE	CG45490	protein_coding	12.5331	191.497	183.56	199.125	168.094	225.869	131.456	6.52661	18.4666	21.6771	12.2702	27.8803	12.4865	252	233	263	206	258	180	7	18	22	14	15	11
FBgn0265961	12.0229	3.38745	0.589395	4.32908e-08	2.15599e-07	TRUE	lncRNA:CR44748	ncRNA	5.47687	5.33133	37.8874	66.6425	26.0517	14.7304	33.7625	2.81915	1.01961	1.96424	0	5.57543	1.13217	7	48	88	32	17	46	3	1	2	0	3	1
FBgn0261630	19.4305	3.37809	0.37394	2.15228e-18	2.96446e-17	TRUE	CG42713	protein_coding	8.74901	35.0544	59.0319	78.6085	56.9111	43.494	41.3032	5.78526	6.66904	2.12067	3.79878	5.91051	3.67576	44	71	97	65	45	54	6	6	2	4	3	3
FBgn0004554	1397.55	3.3719	0.352623	1.29194e-21	2.32683e-20	TRUE	Edg91	protein_coding	9.5504	643.194	4387.44	5351.49	3443.16	3351.19	4364.14	222.978	443.376	194.474	163.102	571.306	251.349	849	5578	7075	4221	3827	5970	240	432	197	185	307	222
FBgn0264541	33.7733	3.36659	0.459885	4.30157e-13	3.63691e-12	TRUE	CG43920	protein_coding	7.24572	43.7126	104.61	13.8972	130.795	72.1367	74.8265	3.49355	11.4646	5.0905	1.68519	8.56867	4.43035	55	118	23	123	64	87	6	11	8	2	6	5
FBgn0034580	895.155	3.36504	0.666764	7.78593e-07	3.23544e-06	TRUE	Cht8	protein_coding	4.94066	126.957	3582.62	3028.23	3023.89	2549.85	2472.62	33.4715	562.994	19.5003	12.075	148.583	15.7687	166	4520	3994	3733	3010	3331	35	560	20	14	80	14
FBgn0036022	3.15442	3.35965	0.780395	3.55113e-05	0.000113226	TRUE	CG8329	protein_coding	4.1349	1.52652	6.32798	26.5213	7.30851	5.13973	3.69084	0	0	0	0	0	0	2	8	35	9	6	5	0	0	0	0	0	0
FBgn0265678	9.02392	3.35677	0.54254	8.74596e-08	4.17355e-07	TRUE	lncRNA:CR44485	ncRNA	5.35102	18.2957	10.2701	12.877	12.1989	6.03672	16.921	0.943154	0	0.980641	1.74012	0	0	24	13	17	15	7	23	1	0	1	2	0	0
FBgn0036947	2.19343	3.34917	0.780306	8.11922e-05	0.000244327	TRUE	obst-F	protein_coding	3.94085	3.05573	15.0423	1.5159	4.05596	7.67237	8.1395	0	0	0	0	0	0	4	19	2	5	9	11	0	0	0	0	0	0
FBgn0027584	2700.88	3.336	0.355965	9.12504e-21	1.52406e-19	TRUE	CG4757	protein_coding	9.34574	2976.42	9532.93	5990.96	7458.84	10956.7	7278.49	574.416	1757.47	445.858	375.63	279.461	451.921	3856	11702	7770	9190	12710	9721	574	1710	473	437	154	410
FBgn0038645	82.7436	3.32941	0.506463	7.40414e-11	5.02819e-10	TRUE	CG7714	protein_coding	6.51223	183.232	405.103	171.268	270.327	128.297	148.485	18.0343	13.1484	13.6925	6.06598	31.583	18.0608	240	512	226	333	150	201	19	13	14	7	17	16
FBgn0052279	68.6248	3.32661	0.767123	5.03476e-05	0.00015654	TRUE	Drsl2	protein_coding	4.05401	13.7169	254.953	334.398	145.821	203.113	228.96	0.878354	32.7638	0	0	9.10975	0	19	330	424	175	214	321	1	31	0	0	5	0
FBgn0265455	5.56688	3.32646	0.692662	6.7065e-07	2.81004e-06	TRUE	CG44355	protein_coding	4.96968	3.05434	7.12196	13.6413	5.68156	2.56395	7.39014	0	0	0	0	0	0	4	9	18	7	3	10	0	0	0	0	0	0
FBgn0030537	4.33322	3.31174	0.651188	8.45918e-06	2.99801e-05	TRUE	CG12480	protein_coding	4.45322	7.32028	10.4911	21.6052	10.7068	7.73129	5.29631	0	0.959149	1.98199	0	0	0	10	13	28	13	9	7	0	1	2	0	0	0
FBgn0053469	17.8369	3.30941	0.393735	3.55194e-16	3.96908e-15	TRUE	CG33469	protein_coding	8.15294	43.5372	63.8542	31.218	59.1128	34.1857	48.0406	5.29307	0	4.63267	5.76352	2.00869	6.13374	56	75	41	77	39	67	6	0	5	7	1	5
FBgn0035022	135.264	3.29924	0.535155	1.1605e-09	6.98044e-09	TRUE	CG11413	protein_coding	6.08561	44.8373	434.885	574.658	346.78	573.277	232.996	19.5835	97.4472	8.86725	11.3924	11.1522	17.0262	59	552	759	425	655	319	21	95	9	13	6	15
FBgn0035546	14.6184	3.29831	0.411373	2.22344e-14	2.11816e-13	TRUE	CG11345	protein_coding	7.637	25.9531	30.8516	37.8885	42.223	20.549	29.5338	6.63886	0	0.978365	2.60103	0	4.51626	34	39	50	52	24	40	7	0	1	3	0	4
FBgn0054057	103.325	3.28744	0.220436	9.90591e-50	1.6301e-47	TRUE	CG34057	protein_coding	14.8263	161.674	217.488	207.455	232.924	143.72	201.972	17.9546	18.8468	16.1528	9.93523	43.4099	15.3196	214	279	277	288	170	276	19	19	17	11	24	13
FBgn0052185	24.8313	3.28702	0.590889	8.92751e-08	4.25759e-07	TRUE	edin	protein_coding	5.3473	50.916	81.296	50.3221	57.6507	127.382	48.8952	3.62421	19.8688	0.997461	0	3.70462	2.30572	68	104	66	70	140	68	4	19	1	0	2	2
FBgn0033297	50.1651	3.2845	0.683748	1.52149e-06	6.02621e-06	TRUE	Mal-A8	protein_coding	4.80839	253.292	153.856	33.3658	131.942	60.8	49.814	4.79357	18.0602	5.84403	2.58346	0	1.12552	331	194	44	163	72	67	5	18	6	3	0	1
FBgn0264862	60.6338	3.28383	0.247442	1.47577e-39	1.07807e-37	TRUE	asRNA:CR44053	ncRNA	13.1608	104.143	202.376	185.063	170.645	105.148	149.734	18.2712	15.0136	11.6733	13.7522	18.5686	13.4942	136	255	244	211	125	201	19	15	12	16	10	12
FBgn0035697	1.6933	3.27393	0.737224	2.49286e-05	8.15973e-05	TRUE	CG10163	protein_coding	4.21545	1.52872	3.1686	6.82265	6.48501	5.09904	5.18778	0	0	0	0	0	0	2	4	9	8	6	7	0	0	0	0	0	0
FBgn0033296	14.6186	3.26989	0.735747	1.93633e-06	7.5469e-06	TRUE	Mal-A7	protein_coding	4.75996	11.1993	36.0279	5.9943	24.6756	12.3878	4.56521	0	1.1325	0	0	0	0	15	48	7	27	13	8	0	1	0	0	0	0
FBgn0012042	248.402	3.25985	0.419145	1.20515e-14	1.17092e-13	TRUE	AttA	protein_coding	7.71549	242.468	839.97	778.736	631.745	751.122	846.538	53.8081	119.875	64.6973	49.5655	14.8656	59.9228	318	1063	1028	777	872	1150	57	118	66	57	8	53
FBgn0267539	35.2457	3.24731	0.2906	8.96974e-28	2.60639e-26	TRUE	CR45879	pseudogene	10.9228	63.4186	46.7193	62.1554	62.4469	63.8685	76.9964	4.76205	3.02597	7.81337	8.64719	9.28793	3.38305	83	59	82	77	75	104	5	3	8	10	5	3
FBgn0264720	5.15858	3.24214	0.671009	5.01009e-07	2.14243e-06	TRUE	lncRNA:CR43988	ncRNA	5.02593	6.0895	3.94455	5.30054	4.07306	8.68871	5.13086	0	0	0	0	0	0	8	5	7	5	10	7	0	0	0	0	0	0
FBgn0001174	2.27188	3.23814	0.72269	2.55198e-05	8.33753e-05	TRUE	halo	protein_coding	4.21015	4.56163	7.8809	9.08545	7.34081	0.87374	6.57894	0.933738	0	0	0	0	0	6	10	12	9	1	9	1	0	0	0	0	0
FBgn0029766	6280.03	3.23775	0.287437	2.14097e-29	7.10611e-28	TRUE	CG15784	protein_coding	11.2569	7880.48	19833.4	15683.8	21542.3	16780.5	16102.5	1369.37	3631.97	1127.63	910.592	1151.47	1429.12	10175	24578	20286	26162	19515	21268	1448	3569	1166	1063	623	1272
FBgn0267758	50.2357	3.23134	0.357302	3.20542e-19	4.71405e-18	TRUE	asRNA:CR46089	ncRNA	8.96141	48.2695	186.608	109.234	180.222	105.661	141.016	11.5681	3.9958	15.5485	8.58195	18.5666	16.8556	63	235	144	223	126	189	12	4	16	10	10	15
FBgn0085305	12.001	3.2299	0.574456	7.2187e-08	3.4841e-07	TRUE	CG34276	protein_coding	5.38564	14.6022	33.0251	39.1889	37.5914	34.4572	13.9975	8.71622	0	1.1425	0	2.17838	5.19044	24	71	58	43	23	29	3	0	2	0	2	2
FBgn0039779	6.52029	3.22737	0.627623	2.19787e-06	8.50268e-06	TRUE	PH4alphaSG2	protein_coding	4.73432	9.94635	28.5457	5.30795	16.1927	29.5836	16.349	0	2.00789	3.89723	0.861556	0	0	13	36	7	20	35	22	0	2	4	1	0	0
FBgn0039316	318.603	3.22549	0.371485	4.56491e-18	6.14671e-17	TRUE	CG11893	protein_coding	8.66375	163.656	1276.02	827.933	1091.22	474.573	1005.63	55.4502	84.4695	59.4832	26.7425	130.012	101.379	214	1610	1092	1347	560	1355	58	84	61	31	70	90
FBgn0265920	2.68633	3.21901	0.795788	0.000271171	0.000746868	TRUE	lncRNA:CR44709	ncRNA	3.64139	0.75534	1.17421	5.01062	16.2554	5.59372	19.1384	0	0	0	0.426261	0	0	2	3	2	7	3	12	0	0	0	1	0	0
FBgn0040735	115.074	3.21034	0.528731	1.80954e-09	1.06709e-08	TRUE	CG16836	protein_coding	6.01404	80.8002	339.55	385.173	381.965	388.906	239.162	19.7134	39.947	31.0806	12.6171	22.1392	20.9536	109	436	501	462	421	334	22	38	31	14	12	18
FBgn0052570	31.0655	3.21031	0.375521	4.12331e-17	5.0438e-16	TRUE	TwdlY	protein_coding	8.40934	135.194	69.658	38.6537	33.2655	40.1027	79.8793	8.55863	4.03957	7.81831	5.19328	7.43077	4.51273	177	88	51	41	47	108	9	4	8	6	4	4
FBgn0037563	90.7099	3.20983	0.797196	1.78043e-05	5.94603e-05	TRUE	CG11672	protein_coding	4.29079	424.875	273.913	220.935	192.975	109.847	262.889	0	0	0	0	21.3022	1.30952	581	359	305	249	135	369	0	0	0	0	12	1
FBgn0013279	6488.8	3.20438	0.668903	3.07543e-06	1.16922e-05	TRUE	Hsp70Bc	protein_coding	4.66572	6278.01	26719.4	21454.8	20567.5	14891	17310.4	215.221	5649.01	157.646	168.556	233.973	236.208	8200	33674	28289	25425	17683	23250	224	5640	162	196	126	210
FBgn0053998	64.84	3.19267	0.429664	2.13288e-13	1.87112e-12	TRUE	CG33998	protein_coding	7.34019	72.926	214.225	240.766	174.682	206.905	152.53	9.31349	41.071	20.7014	7.01661	9.29326	11.3561	96	272	318	214	236	209	10	40	21	8	5	10
FBgn0052636	12.0942	3.18972	0.607823	4.99015e-07	2.13495e-06	TRUE	lncRNA:CR32636	ncRNA	5.02669	3.82427	36.4629	43.9762	51.0281	24.5569	29.6981	0.956624	9.04587	0	0.862331	0	2.25247	5	46	58	63	29	40	1	9	0	1	0	2
FBgn0032809	3.74508	3.18937	0.666403	1.02633e-05	3.57581e-05	TRUE	CG13078	protein_coding	4.41155	3.05304	10.283	6.81976	13.805	11.1361	5.16717	0	0	0	0	3.71582	0	4	13	9	17	13	7	0	0	0	0	2	0
FBgn0053465	206.966	3.18844	0.234756	7.49958e-42	6.23622e-40	TRUE	CG33465	protein_coding	13.554	281.528	688.192	636.176	701.24	378.054	459.118	42.1318	68.2942	61.3935	42.2289	40.8582	73.1849	368	868	839	866	447	618	44	68	63	49	22	65
FBgn0040723	58.2905	3.18527	0.40661	7.16321e-15	7.13718e-14	TRUE	CG5011	protein_coding	7.78157	42.3033	160.07	126.17	163.074	135.345	133.407	12.9848	12.0321	10.4407	6.53776	25.2963	6.02481	57	208	166	209	144	202	15	11	10	7	13	5
FBgn0035788	67.5709	3.17669	0.333085	2.65748e-21	4.6679e-20	TRUE	CG8541	protein_coding	9.4754	119.867	183.566	115.189	245.967	193.281	137.41	10.4417	10.1136	18.5821	19.9301	3.71564	34.9919	157	232	152	303	226	186	11	10	19	23	2	31
FBgn0045443	9.8413	3.17608	0.569648	1.16204e-07	5.45696e-07	TRUE	mthl11	protein_coding	5.29937	8.47514	28.7457	23.6741	51.8664	18.7453	23.0079	1.92839	5.05852	0	4.34056	0	0	11	36	31	64	22	31	2	5	0	5	0	0
FBgn0033696	135.698	3.16866	0.447941	1.52174e-12	1.2156e-11	TRUE	Cyp6g2	protein_coding	7.07249	121.695	185.614	183.521	57.458	62.4238	108.607	6.71651	32.086	1.94735	3.44285	12.9992	6.7515	159	234	242	71	74	146	7	32	2	4	7	6
FBgn0032734	244.225	3.16815	0.545778	9.64555e-09	5.20141e-08	TRUE	CG15169	protein_coding	5.73685	60.4117	1211.75	668.704	712.138	662.063	624.803	20.072	215.237	14.6285	31.0605	29.7172	11.2652	79	1529	882	879	781	842	21	214	15	36	16	10
FBgn0003486	6.8298	3.16744	0.692568	2.32482e-05	7.64812e-05	TRUE	spo	protein_coding	4.23117	1.57649	14.7047	26.5511	27.4931	18.2237	20.6914	3.95497	0	2.00457	0	0	0	2	18	34	33	21	27	4	0	2	0	0	0
FBgn0262823	10.0454	3.16617	0.439986	6.81079e-12	5.10662e-11	TRUE	hemo	protein_coding	6.86157	20.5842	33.4205	29.5357	29.2003	22.7279	30.2931	2.39132	7.28075	0	2.33878	0	3.04528	30	47	39	40	26	42	2	8	0	3	0	3
FBgn0265548	36.0219	3.16517	0.303812	3.48381e-24	7.57475e-23	TRUE	lncRNA:CR44398	ncRNA	10.1451	41.1866	51.3776	43.1825	68.2711	52.4571	49.3606	6.61646	5.07423	3.919	6.95087	1.85814	4.52075	54	65	57	84	61	67	7	5	4	8	1	4
FBgn0031412	50.0315	3.16157	0.547177	1.10421e-08	5.88149e-08	TRUE	CG16995	protein_coding	5.71389	28.1881	158.697	163.587	131.844	170.449	107.97	0.940766	25.4678	5.88994	10.4576	18.584	1.13179	37	201	216	162	197	147	1	25	6	12	10	1
FBgn0004240	1255.59	3.15711	0.296692	2.33663e-26	6.06786e-25	TRUE	DptA	protein_coding	10.6227	2778.27	3624.27	1973.89	5089.7	4009.27	2833.99	370.828	523.082	219.959	166.194	248.914	581.103	3675	4616	2604	6212	4500	3911	403	505	222	188	134	509
FBgn0039452	254.417	3.14878	0.546306	1.17636e-08	6.23601e-08	TRUE	CG14245	protein_coding	5.70312	259.525	1311.8	263.852	675.925	395.579	1165.19	25.2529	73.7803	8.61346	8.73953	199.738	25.0729	338	1640	334	798	421	1587	27	66	9	9	103	20
FBgn0036952	11.8027	3.14834	0.598593	4.30557e-07	1.86452e-06	TRUE	CG6933	protein_coding	5.05493	1.55372	14.4044	58.8219	25.4626	30.1279	49.2392	1.92788	0	1.98363	1.75556	3.77541	4.58172	2	18	77	31	35	67	2	0	2	2	2	4
FBgn0035176	472.618	3.13588	0.515651	2.02779e-09	1.18506e-08	TRUE	CG13905	protein_coding	5.99556	512.158	1672.2	1207.86	1231.86	937.039	2196.17	25.5997	404.926	42.0747	48.5614	118.906	47.4247	671	2114	1594	1517	1094	2975	27	400	43	56	64	42
FBgn0086782	2.18793	3.13479	0.745919	8.36566e-05	0.000251307	TRUE	amn	protein_coding	3.93368	1.53209	11.1151	5.30972	8.89192	3.3577	5.96589	0	0.999583	0	0	0	0	2	14	7	11	4	8	0	1	0	0	0	0
FBgn0003865	2.68772	3.12939	0.797837	0.000277557	0.000762174	TRUE	tsg	protein_coding	3.63539	7.63136	11.863	8.33487	14.62	0	3.68918	0	0	0	0	0	0	10	15	11	18	0	5	0	0	0	0	0	0
FBgn0000276	187.026	3.12912	0.562954	4.40477e-08	2.1902e-07	TRUE	CecA1	protein_coding	5.4738	191.441	549.977	539.408	573.462	730.882	454.447	5.28481	158.474	11.1229	10.065	49.3003	17.8169	264	711	687	689	773	637	6	150	11	11	27	15
FBgn0033789	12.3676	3.12552	0.598851	5.2368e-07	2.23253e-06	TRUE	CG13324	protein_coding	5.01743	6.05443	17.2846	25.7621	31.9297	14.2099	39.1823	3.68941	0	0	0.882639	5.57382	0	8	22	34	39	16	54	4	0	0	1	3	0
FBgn0015035	242.057	3.1187	0.450588	6.2714e-12	4.72258e-11	TRUE	Cyp4e3	protein_coding	6.87334	541.014	807.339	384.464	823.232	753.29	584.367	70.9415	35.1184	16.5584	14.6401	213.566	27.0128	707	1018	507	1017	892	786	74	35	17	17	115	24
FBgn0267645	4.86888	3.11499	0.671575	4.2748e-06	1.58849e-05	TRUE	lncRNA:CR45983	ncRNA	4.59755	4.40759	7.76491	8.52795	4.97545	12.1392	2.85816	0	0	0	0.907221	0	0	6	10	11	6	13	4	0	0	0	1	0	0
FBgn0041234	11.7513	3.11453	0.452094	3.53542e-11	2.48067e-10	TRUE	Gr59f	protein_coding	6.62235	16.0516	38.0233	18.9518	52.6905	35.6926	22.9747	2.86184	4.02941	4.8801	0.863846	1.85747	3.38147	21	48	25	65	42	31	3	4	5	1	1	3
FBgn0010241	42.7917	3.10981	0.34494	4.59728e-19	6.6731e-18	TRUE	Mdr50	protein_coding	8.92157	42.135	103.217	99.3692	103.462	53.7055	119.338	0.963491	8.99439	12.6359	13.7357	11.1402	6.74329	55	130	131	128	64	160	1	9	13	16	6	6
FBgn0033353	4.24713	3.108	0.663121	2.83646e-05	9.19965e-05	TRUE	CG13749	protein_coding	4.18621	4.38694	18.5039	9.43704	15.5612	9.85279	9.19108	2.02255	0	2.09544	0	0	0	6	24	13	20	12	13	2	0	2	0	0	0
FBgn0267195	1.64166	3.09888	0.776847	0.000228474	0.000638037	TRUE	lncRNA:CR45635	ncRNA	3.68525	5.31959	6.30257	6.05701	7.34363	0.875358	3.65175	0	0	0	0	0	0	7	8	8	9	1	5	0	0	0	0	0	0
FBgn0034511	232.12	3.09141	0.36054	1.10875e-17	1.43248e-16	TRUE	GNBP-like3	protein_coding	8.56205	202.884	343.39	606.86	540.251	1089.74	394.126	33.2238	64.09	44.53	36.1726	124.489	33.0588	268	437	801	660	1228	543	36	62	45	41	67	29
FBgn0261813	1.6504	3.09129	0.77835	0.000244118	0.000678091	TRUE	lncRNA:CR42755	ncRNA	3.66835	2.29207	4.75077	8.33775	8.92179	1.70384	3.701	0	0	0	0	0	0	3	6	11	11	2	5	0	0	0	0	0	0
FBgn0263081	98.7378	3.09106	0.389003	2.43657e-15	2.5377e-14	TRUE	CG43349	protein_coding	7.91682	49.6855	285.783	243.96	364.301	209.943	220.92	12.9216	21.726	29.0175	13.876	43.7608	21.6866	70	381	322	447	228	308	14	20	28	16	23	18
FBgn0033205	994.958	3.08788	0.273297	1.45422e-29	4.92073e-28	TRUE	CG2064	protein_coding	11.291	1081.54	3290.49	2635.04	3215.88	2133.47	2615.15	272.788	329.444	205.953	158.963	508.95	181.48	1415	4154	3476	3967	2510	3529	286	327	211	184	274	161
FBgn0032733	2.86584	3.08148	0.685091	3.97093e-05	0.000125536	TRUE	CG15170	protein_coding	4.10916	3.0623	7.91801	9.10464	7.29046	7.60967	7.43654	0	0	0	0	0	2.25269	4	10	12	9	9	10	0	0	0	0	0	2
FBgn0036362	12.5354	3.08062	0.727396	8.66554e-05	0.000259518	TRUE	CG10725	protein_coding	3.92521	3.0523	154.997	4.54619	12.1845	6.8622	30.2444	0	4.05299	3.91578	1.73558	1.85799	1.12954	4	196	6	15	8	41	0	4	4	2	1	1
FBgn0267635	39.614	3.06432	0.346448	1.96626e-18	2.71542e-17	TRUE	lncRNA:CR45973	ncRNA	8.75921	48.5825	116.346	76.385	126.978	102.426	94.2047	7.52209	17.91	3.3775	14.6338	6.44925	11.1217	59	136	100	149	110	119	9	17	4	15	4	9
FBgn0264775	146.374	3.06404	0.409282	8.18261e-14	7.39842e-13	TRUE	CG44013	protein_coding	7.46735	59.0162	373.422	374.724	381.307	320.892	477.877	9.0267	76.9784	25.2748	48.4351	26.4852	16.8903	71	440	473	458	369	656	9	68	29	53	16	16
FBgn0051410	10.85	3.06288	0.525304	2.14894e-08	1.10763e-07	TRUE	Npc2e	protein_coding	5.59956	10.6549	39.44	15.9012	47.2562	26.0881	27.1091	0	0	2.94971	4.368	5.57578	3.39944	14	50	21	58	30	37	0	0	3	5	3	3
FBgn0038526	37.518	3.05779	0.567662	1.35027e-07	6.28239e-07	TRUE	CG14327	protein_coding	5.27189	13.1378	89.3295	84.9897	144.845	123.57	148.501	8.14357	28.4916	4.22694	0	6.00587	6.0929	16	117	110	179	145	208	10	26	4	0	3	5
FBgn0030477	24.0604	3.0527	0.467574	1.47658e-10	9.76453e-10	TRUE	dmrt11E	protein_coding	6.40778	77.979	93.491	37.9056	76.1816	34.8082	53.3872	8.5922	4.02691	0.975706	14.6782	7.42965	1.1269	102	118	50	94	41	72	9	4	1	17	4	1
FBgn0053963	7.34455	3.05069	0.553392	2.48265e-07	1.11143e-06	TRUE	lncRNA:CR33963	ncRNA	5.15901	6.87814	40.393	15.1607	14.5942	9.35661	14.0748	2.8598	3.02379	0	0.864232	1.85752	0	9	51	20	18	11	19	3	3	0	1	1	0
FBgn0033216	47.0611	3.04461	0.411549	2.17706e-13	1.90773e-12	TRUE	CG1946	protein_coding	7.33745	32.8642	229.7	81.1114	132.959	61.2225	125.213	10.4887	13.1003	17.5716	3.45635	5.57251	18.0368	43	290	107	164	72	169	11	13	18	4	3	16
FBgn0039453	3.57947	3.04253	0.745392	0.000129687	0.000377542	TRUE	CG6403	protein_coding	3.82705	0	18.3384	10.9032	7.23238	10.6735	8.07183	0	0	0	0.971162	0	1.25768	0	22	13	8	11	12	0	0	0	1	0	1
FBgn0002732	128.954	3.04136	0.454378	3.05218e-11	2.16197e-10	TRUE	E(spl)malpha-BFM	protein_coding	6.64403	151.493	472.609	366.499	421.921	257.912	370.251	40.3396	100.057	18.6733	19.2062	1.85855	23.7881	199	599	484	518	297	505	43	98	19	22	1	21
FBgn0267576	21.0181	3.0358	0.435152	7.88299e-12	5.87672e-11	TRUE	lncRNA:CR45916	ncRNA	6.84066	27.5773	46.8415	48.5459	67.9029	64.6399	46.9798	3.85276	12.9951	3.88849	3.4346	0	5.61992	36	59	64	84	77	63	4	13	4	4	0	5
FBgn0267027	3.92948	3.03054	0.674059	2.48194e-06	9.54024e-06	TRUE	lncRNA:CR45471	ncRNA	4.70961	4.57802	6.32582	5.30374	4.87438	4.29109	0.737479	0	0	0	0	0	0	6	8	7	6	5	1	0	0	0	0	0	0
FBgn0034331	68.1456	3.02897	0.689477	6.08517e-06	2.19902e-05	TRUE	CG15067	protein_coding	4.52341	61.3108	52.3956	76.9717	132.779	141.303	256.8	1.89079	7.43149	2.03177	0.906103	28.5913	1.17043	82	69	99	161	169	353	2	7	2	1	15	1
FBgn0051776	115.787	3.02413	0.283161	2.01229e-26	5.27822e-25	TRUE	CG31776	protein_coding	10.6367	153.837	150.709	175.937	146.482	156.924	165.131	29.7414	2.00555	12.6583	30.1269	22.2845	11.2528	201	190	232	181	186	222	31	2	13	35	12	10
FBgn0030899	2.24824	3.02343	0.74476	0.000113291	0.000332783	TRUE	Hesr	protein_coding	3.86021	1.52044	6.30449	2.27136	9.7881	8.73943	6.5782	0	0	0.984794	0	0	0	2	8	3	12	10	9	0	0	1	0	0	0
FBgn0053346	54.4621	3.02272	0.550559	3.95974e-08	1.97709e-07	TRUE	CG33346	protein_coding	5.49264	11.4603	100.557	122.034	72.1858	98.8253	99.1857	2.85628	27.241	1.95361	0	9.28805	2.25558	15	127	161	89	116	134	3	27	2	0	5	2
FBgn0000216	2.72718	3.01979	0.684122	0.000130574	0.000379982	TRUE	Brd	protein_coding	3.82537	3.7889	11.7941	6.05926	10.6335	7.07642	5.81489	0	2.06383	0	0	1.85831	0	5	15	8	13	8	8	0	2	0	0	1	0
FBgn0051446	162.053	3.00476	0.572316	1.86078e-07	8.48207e-07	TRUE	CG31446	protein_coding	5.21273	41.9837	406.271	569.463	617.195	455.516	354.407	44.5195	39.5399	12.7326	10.4192	105.665	4.52026	55	514	752	760	531	481	47	39	13	12	57	4
FBgn0052644	2.0128	3.00356	0.740019	0.000122762	0.000358851	TRUE	Mur11Da	protein_coding	3.84054	0.765392	7.13917	5.3085	7.28321	9.27809	2.23179	0	0	0.973634	0	0	0	1	9	7	9	11	3	0	0	1	0	0	0
FBgn0264437	58.046	3.00289	0.411465	5.33482e-13	4.44796e-12	TRUE	lncRNA:CR43855	ncRNA	7.21649	156.531	152.016	184.82	163.184	114.191	162.457	6.51509	43.3996	22.3499	16.3514	5.78445	6.23631	204	187	225	187	115	216	7	39	21	17	3	5
FBgn0265186	130.802	3.00113	0.366547	3.07887e-16	3.47023e-15	TRUE	CG44251	protein_coding	8.1702	139.474	342.14	294.19	382.244	219.575	323.537	31.3821	36.2739	9.65822	27.3241	66.2996	20.9257	180	435	386	471	259	436	33	35	10	32	36	18
FBgn0263651	9.22884	3.00024	0.553452	2.44844e-07	1.09675e-06	TRUE	lncRNA:CR43642	ncRNA	5.1616	6.10552	35.5916	34.8556	31.6738	12.8556	28.7813	1.89537	2.02541	0.978676	3.46971	0	5.64658	8	45	46	39	15	39	2	2	1	4	0	5
FBgn0030994	48.4977	2.99628	0.271093	5.71521e-28	1.7081e-26	TRUE	HP1D3csd	protein_coding	10.9636	175.417	110.654	101.516	125.984	71.3945	109.022	8.50521	19.2852	11.758	11.2966	18.5812	14.6933	230	140	134	155	83	148	9	19	12	13	10	13
FBgn0029920	8.89823	2.99554	0.53668	1.03969e-07	4.91486e-07	TRUE	CR4575	pseudogene	5.31965	12.1952	33.9655	28.0253	37.417	11.2201	17.6496	4.71284	2.03431	0	3.48165	3.7166	0	16	43	37	46	13	24	5	2	0	4	2	0
FBgn0033203	21.4607	2.99289	0.565207	1.82983e-07	8.35202e-07	TRUE	CG2070	protein_coding	5.21584	10.9909	46.5613	56.4251	55.1885	72.3963	47.9079	2.1074	4.20179	3.25922	7.54373	7.29847	1.24789	13	55	79	63	83	63	2	5	4	10	4	1
FBgn0015376	597.688	2.97876	0.223545	1.88276e-40	1.44991e-38	TRUE	cutlet	protein_coding	13.3154	903.001	2079.71	1681.58	1897.67	1088.19	1334.91	212.7	283.068	143.92	154.632	107.694	188.872	1179	2620	2217	2347	1295	1791	221	283	148	180	58	168
FBgn0263872	11.4784	2.97286	0.582264	1.98719e-06	7.73741e-06	TRUE	lncRNA:CR43719	ncRNA	4.75472	15.1702	17.7973	15.881	15.411	8.17488	6.62774	0	0	0	4.04256	2.14985	0	19	20	20	20	9	10	0	0	0	4	1	0
FBgn0265139	3.77032	2.96936	0.695767	0.000132308	0.00038467	TRUE	Gr2a	protein_coding	3.82212	2.33309	7.72775	12.5647	25.1281	10.2529	3.01993	0.972837	2.04353	0	0	0	1.14503	3	10	17	31	12	4	1	2	0	0	0	1
FBgn0038204	2.9699	2.96903	0.67467	1.47473e-05	4.99772e-05	TRUE	CG14357	protein_coding	4.33243	2.2905	6.33	6.06264	5.68224	7.69603	2.95526	0	0	0.977977	0	0	0	3	8	8	7	9	4	0	0	1	0	0	0
FBgn0038455	253.247	2.96739	0.224748	1.03587e-39	7.6748e-38	TRUE	CG14907	protein_coding	13.1875	313.258	761.725	598.806	660.192	367.98	544.084	62.8461	36.3177	83.0242	55.3492	91.0224	73.3038	410	962	790	814	432	735	66	36	85	64	49	65
FBgn0034224	10.3462	2.95781	0.532548	9.5144e-08	4.52506e-07	TRUE	insb	protein_coding	5.33576	5.97125	39.0808	21.4492	40.4335	31.5177	22.5629	2.47906	7.01416	0	4.0474	0	1.31671	9	48	32	49	33	29	3	8	0	4	0	1
FBgn0267443	11.5828	2.95053	0.532152	7.8858e-08	3.78737e-07	TRUE	lncRNA:CR45793	ncRNA	5.36972	9.14616	26.0659	23.4805	45.5524	28.4855	34.5616	0.942474	4.06895	0	0.870468	9.29153	3.39346	12	33	31	56	33	47	1	4	0	1	5	3
FBgn0283479	72.4598	2.94803	0.467833	4.70648e-10	2.94424e-09	TRUE	Alp1	protein_coding	6.22859	70.4967	249.325	190.408	186.757	227.905	235.452	15.3583	66.3208	16.5821	5.95491	7.43874	12.3985	92	315	251	231	270	317	16	66	17	7	4	11
FBgn0034095	194.81	2.94726	0.265096	1.28534e-28	4.07582e-27	TRUE	CG15701	protein_coding	11.0978	218.291	638.227	701.615	645.998	273.876	366.75	44.2804	63.0062	45.701	50.6792	74.271	73.0718	285	804	925	799	326	492	46	63	47	59	40	65
FBgn0267620	16.3975	2.93638	0.552514	2.1301e-07	9.64654e-07	TRUE	lncRNA:CR45958	ncRNA	5.18761	17.3289	30.5682	14.4266	24.6313	40.4388	18.0536	2.74289	0	0	0	5.56816	5.72873	23	39	19	30	45	25	3	0	0	0	3	5
FBgn0015010	754.709	2.93427	0.459133	2.42771e-10	1.57088e-09	TRUE	Ag5r	protein_coding	6.33151	1008.16	2152.29	1854.15	2950.96	1801.99	2402.17	129.154	766.884	158.758	137.113	27.394	111.794	1280	2619	2282	3399	1976	3007	132	705	152	145	16	100
FBgn0044812	39.9189	2.93367	0.647604	8.70903e-06	3.08028e-05	TRUE	TotC	protein_coding	4.44697	9.09239	89.6295	23.4805	17.1783	127.421	354.655	7.399	5.16055	3.95464	3.52415	29.7324	2.2777	12	114	31	21	144	488	8	5	4	4	16	2
FBgn0031033	25.8377	2.92438	0.750591			FALSE	CG14219	protein_coding	3.7622	1.53114	2.38029	7.58406	7.28101	16.0047	383.379	2.88178	3.00534	3.89285	2.5803	11.1417	0	2	3	10	9	19	515	3	3	4	3	6	0
FBgn0042101	10.2028	2.92171	0.542015	2.27156e-07	1.02162e-06	TRUE	CG18744	protein_coding	5.17562	9.9399	23.7723	21.9861	20.2575	17.8146	20.7699	0	0	3.90183	0	9.28684	0	13	30	29	25	21	28	0	0	4	0	5	0
FBgn0262005	11.7188	2.92033	0.525351	8.45274e-08	4.04103e-07	TRUE	CG42823	protein_coding	5.35719	8.32315	27.4953	36.3732	40.1227	31.9912	42.7983	1.84383	9.31008	1.97999	0.882901	5.57378	1.14057	11	35	48	49	36	59	2	9	2	1	3	1
FBgn0050203	159.285	2.91836	0.313875	1.61218e-20	2.63909e-19	TRUE	CG30203	protein_coding	9.28532	258.842	443.665	316.281	432.647	237.14	274.929	31.7421	33.0233	31.1255	10.3125	98.4123	41.604	338	559	417	535	282	369	33	33	32	12	53	37
FBgn0036363	67.0992	2.91665	0.417677	4.245e-12	3.25464e-11	TRUE	CG10140	protein_coding	6.92878	69.483	196.24	189.46	205.359	159.86	223.893	16.1425	48.5322	6.84519	9.52981	14.8624	23.7019	91	248	250	253	187	303	17	48	7	11	8	21
FBgn0051080	1.61998	2.91638	0.742269	0.000257641	0.000713119	TRUE	TwdlH	protein_coding	3.65454	9.92303	3.1642	4.54659	3.24801	2.56891	3.69152	0	0	0.9784	0	0	0	13	4	6	4	3	5	0	0	1	0	0	0
FBgn0030438	2.97747	2.90712	0.68629	0.00017294	0.000494798	TRUE	CG15721	protein_coding	3.75558	2.29734	6.34921	5.30923	17.7918	7.56962	6.70498	0.961749	0	0	0	0	2.24896	3	8	7	22	9	9	1	0	0	0	0	2
FBgn0030097	1.6593	2.90565	0.749839	0.000147099	0.000425063	TRUE	CG12115	protein_coding	3.79592	6.8673	6.32607	0.757686	4.87414	2.57409	2.21268	0	0	0	0	0	0	9	8	1	6	3	3	0	0	0	0	0	0
FBgn0036690	161.923	2.89777	0.249949	5.61396e-31	2.16165e-29	TRUE	Ilp8	protein_coding	11.5735	305.208	316.298	446.275	389.126	256.573	273.622	30.2969	43.5801	28.3929	45.1336	72.4623	38.4075	400	400	589	479	299	371	32	43	29	52	39	34
FBgn0038014	32.0213	2.89173	0.530904	6.80966e-08	3.30299e-07	TRUE	CG10041	protein_coding	5.39612	33.5975	123.447	78.8163	99.0221	52.1353	62.8152	2.84916	17.1861	0.977815	2.59876	22.2934	2.25722	44	156	104	122	61	85	3	17	1	3	12	2
FBgn0035286	35.7948	2.88493	0.233588	3.20156e-34	1.58889e-32	TRUE	CG13924	protein_coding	12.1976	72.2033	97.4743	79.0773	81.2581	64.8314	86.3866	12.6251	7.1468	7.92128	8.75902	12.7843	14.8698	96	125	105	102	76	118	13	7	8	10	7	13
FBgn0051832	12.764	2.88258	0.426596	5.47284e-11	3.77069e-10	TRUE	CG31832	protein_coding	6.55747	15.2448	41.0769	21.9662	34.9742	40.5528	30.1561	2.82839	6.1017	1.96157	0.870277	1.85828	7.91727	20	52	29	43	47	41	3	6	2	1	1	7
FBgn0045468	4.32145	2.87701	0.666079	8.91569e-05	0.000266448	TRUE	Gr93d	protein_coding	3.91835	5.34919	7.12753	0.758018	13.785	11.9143	10.3683	0.952898	0	0	1.72888	0	0	7	9	1	17	14	14	1	0	0	2	0	0
FBgn0035847	1.14481	2.87522	0.760364	0.000407469	0.00107783	TRUE	mthl7	protein_coding	3.5352	2.32885	3.21806	3.848	4.00449	3.44027	3.76698	0	0	0	0	0	0	3	4	5	5	4	5	0	0	0	0	0	0
FBgn0033110	54.2286	2.87251	0.655643	9.67335e-06	3.39142e-05	TRUE	CG9447	protein_coding	4.42435	68.1305	240.39	34.8859	190.135	48.0353	66.9832	0.960257	13.0268	0	1.72058	35.2824	1.12499	89	303	46	235	57	90	1	13	0	2	19	1
FBgn0047205	5.48684	2.86477	0.615721	1.46215e-05	4.95829e-05	TRUE	lncRNA:CR32385	ncRNA	4.33432	4.59416	23.8068	23.5116	10.5149	13.4656	11.1714	0	5.00608	0	0.859722	0	2.24929	6	30	31	13	16	15	0	5	0	1	0	2
FBgn0052571	23.3845	2.8628	0.451112	3.81108e-10	2.40917e-09	TRUE	TwdlX	protein_coding	6.26157	36.7038	107.776	54.5873	59.1464	14.4155	39.3224	6.68905	2.01195	2.92599	6.04045	13.0014	6.75957	48	136	72	73	17	53	7	2	3	7	7	6
FBgn0033207	60.0437	2.86047	0.377834	4.71468e-14	4.35092e-13	TRUE	CG12826	protein_coding	7.53959	114.268	198.949	86.3364	161.154	77.8942	135.861	12.2272	18.3399	2.94527	6.10103	42.7438	16.9781	150	252	114	198	90	185	13	18	3	7	23	15
FBgn0038290	703.631	2.85873	0.590858			FALSE	CG6912	protein_coding	4.95813	709.705	546.088	438.99	581.641	553.301	547.015	23.9039	36.1977	10.7259	4.31298	224.733	3.37919	928	689	579	718	653	737	25	36	11	5	121	3
FBgn0032036	3820.88	2.85569	0.154733	4.86164e-76	4.22233e-73	TRUE	CG13384	protein_coding	18.4538	10263.5	10814.4	8709.7	9104.53	6306.78	9553.57	1224.94	1780.24	965.942	917.583	1411.3	1130.17	12895	13055	11049	10788	7222	12281	1266	1745	1010	1061	778	1022
FBgn0035547	1.36979	2.84907	0.783909	0.000767261	0.00191515	TRUE	CG15022	protein_coding	3.36434	2.29174	2.37503	6.82151	4.86731	6.82089	1.4798	0	0	0	0	0	0	3	3	9	6	8	2	0	0	0	0	0	0
FBgn0034289	6.80359	2.84728	0.588782	4.89132e-06	1.80132e-05	TRUE	CG10910	protein_coding	4.5694	3.82689	8.72547	21.2339	27.515	12.6533	15.6216	2.87853	0	3.89468	0	0	1.12525	5	11	28	34	15	21	3	0	4	0	0	1
FBgn0001258	3204.25	2.84381	0.262659	2.69616e-27	7.67742e-26	TRUE	Ldh	protein_coding	10.8224	2707.27	9158.96	6854.7	10165.2	7988.69	10328.7	916.049	1680.07	1053.8	939.808	568.737	1063.83	3567	11621	9118	12643	9507	14020	954	1665	1073	1082	302	936
FBgn0041183	231.473	2.84003	0.369277	1.87386e-14	1.79388e-13	TRUE	Tep1	protein_coding	7.659	561.541	1152.06	359.549	847.909	288.678	435.574	74.1866	164.901	60.2645	47.2174	27.8505	80.9202	733	1451	474	1049	344	584	77	165	62	55	15	72
FBgn0001089	3287.57	2.83678	0.202423	1.32794e-44	1.42189e-42	TRUE	Gal	protein_coding	14.0114	13799	8688.94	7185.41	7466.02	4084.88	6856.59	1115.35	1318.26	954.663	921.089	1203.27	1008.96	18024	10951	9474	9229	4850	9210	1161	1316	981	1071	648	897
FBgn0063492	606.985	2.83658	0.297271	1.50212e-21	2.68681e-20	TRUE	GstE8	protein_coding	9.53477	1118.64	1885.52	1252.38	2028.95	1023.3	1330.95	177.247	166.068	123.903	108.613	416.125	141.889	1557	2580	1777	2632	1274	1865	195	152	122	118	225	123
FBgn0267949	2.41928	2.83177	0.68738	2.00687e-05	6.65677e-05	TRUE	lncRNA:CR46229	ncRNA	4.26413	3.05244	2.37252	2.27313	4.87355	2.57268	5.16433	0	0	0	0	0	0	4	3	3	6	3	7	0	0	0	0	0	0
FBgn0027843	3575.41	2.8291	0.218335	2.19979e-38	1.48871e-36	TRUE	CAH2	protein_coding	12.9551	9248.35	11521.9	7303.57	10174.8	6053.44	6947.7	1015.13	1521.97	1081.12	781.911	1478.6	1074.39	12152	14598	9685	12633	7176	9393	1060	1521	1090	891	801	949
FBgn0264984	8.71875	2.82845	0.590743	4.64851e-06	1.71757e-05	TRUE	lncRNA:CR44135	ncRNA	4.58006	18.9516	28.3127	14.3897	47.4279	11.4848	14.5453	0.925983	5.15602	0.988171	1.76066	0	4.55293	25	36	19	58	13	20	1	5	1	2	0	4
FBgn0262680	3.76444	2.82441	0.689528	1.41149e-05	4.80005e-05	TRUE	lncRNA:CR43150	ncRNA	4.34207	5.28247	3.13764	1.51731	5.74181	3.58054	3.61621	0	0	0	0	0	0	7	4	2	7	4	5	0	0	0	0	0	0
FBgn0266212	6.29848	2.82393	0.521993	3.79638e-07	1.65964e-06	TRUE	asRNA:CR44907	ncRNA	5.07889	8.33291	12.5776	23.4823	17.1814	7.96963	17.4361	0.924351	3.09755	1.97777	1.76272	0	1.13912	11	16	31	21	9	24	1	3	2	2	0	1
FBgn0033774	15.8867	2.8212	0.389468	1.42456e-12	1.14147e-11	TRUE	CG12374	protein_coding	7.08164	29.8281	59.448	37.1519	45.3605	27.1032	23.7559	1.91292	7.03663	2.92487	5.17454	7.4291	4.50517	39	75	49	56	32	32	2	7	3	6	4	4
FBgn0031430	273.102	2.81924	0.226361	1.5846e-35	8.75337e-34	TRUE	CG3528	protein_coding	12.44	322.034	266.515	323.542	318.402	370.451	283.306	37.891	12.1568	57.7524	56.3985	55.7392	37.2722	422	337	427	392	432	384	40	12	59	65	30	33
FBgn0039444	85.0734	2.81886	0.38932	5.55519e-13	4.62429e-12	TRUE	TwdlD	protein_coding	7.21098	99.2592	149.551	371.339	215.917	212.889	195.801	13.2925	20.2234	18.5806	12.996	76.1699	20.3165	130	189	490	266	249	265	14	20	19	15	41	18
FBgn0003373	10.777	2.81739	0.432489	3.02404e-10	1.93829e-09	TRUE	Sgs3	protein_coding	6.29754	18.3375	35.6325	25.0136	37.307	17.8855	32.5732	4.76156	4.03496	1.95343	3.4591	0	5.63858	24	45	33	46	21	44	5	4	2	4	0	5
FBgn0067905	49.7962	2.81177	0.370226	4.36079e-14	4.03625e-13	TRUE	IM14	protein_coding	7.54975	44.2104	104.757	68.8434	127.296	122.132	124.636	20.2781	9.20547	8.3504	4.27217	29.7647	4.21508	71	142	75	141	119	172	25	9	8	4	18	3
FBgn0035208	399.649	2.80895	0.203745	3.57948e-43	3.31112e-41	TRUE	CG9184	protein_coding	13.7755	1070.78	1081.88	918.553	1073.66	741.909	850.942	196.157	185.634	87.721	102.803	67.764	148.32	1407	1375	1223	1330	875	1153	205	180	91	119	36	131
FBgn0039789	910.748	2.80267	0.509992	4.36192e-08	2.17027e-07	TRUE	CG9717	protein_coding	5.47554	682.27	3073.63	2238.18	2621.25	1837.49	2735.18	107.688	860.879	72.9623	76.5037	248.82	120.328	891	3873	2951	3241	2184	3672	112	860	75	89	134	107
FBgn0035501	2176.17	2.80062	0.400639	2.85546e-12	2.23308e-11	TRUE	CG1299	protein_coding	6.98466	2509.43	5856.46	5900.25	5398.87	4323.1	5646.87	566.974	700.672	263.17	226.663	1667.68	292.258	3255	7262	7605	6552	5027	7419	595	685	269	269	906	258
FBgn0039069	313.894	2.79943	0.239296	1.44234e-31	5.84149e-30	TRUE	CG6763	protein_coding	11.6895	621.104	1161.33	508.466	819.436	337.212	723.112	106.532	117.548	103.395	74.3947	71.8768	98.3861	672	1183	558	813	331	801	122	119	123	88	51	95
FBgn0042127	319.401	2.79823	0.32324	4.95758e-18	6.64681e-17	TRUE	CG18789	protein_coding	8.65434	361.705	271.832	348.757	343.513	451.836	399.219	64.0386	25.1448	15.6038	114.752	44.5758	20.2773	473	343	460	424	533	538	67	25	16	133	24	18
FBgn0267611	10.1543	2.79808	0.492455	4.12926e-08	2.05975e-07	TRUE	lncRNA:CR45949	ncRNA	5.48523	16.8415	30.9417	18.9598	27.5084	20.2239	21.5843	0	10.0201	1.94666	1.72052	0	1.12497	22	39	25	34	24	29	0	10	2	2	0	1
FBgn0032024	6.43364	2.79023	0.521362	4.90733e-07	2.10297e-06	TRUE	CG14273	protein_coding	5.0299	6.11125	23.7501	14.4009	17.0358	11.9372	11.0982	1.90295	0	2.93121	3.46101	0	0	8	30	19	21	14	15	2	0	3	4	0	0
FBgn0034126	100.271	2.7886	0.252135	6.0045e-28	1.77781e-26	TRUE	jtb	protein_coding	10.9592	56.4415	69.558	62.88	78.0233	71.3725	107.565	13.2334	10.1481	13.7163	5.21302	18.5813	2.26035	74	88	83	96	83	146	14	10	14	6	10	2
FBgn0267991	1.48267	2.77754	0.729859	0.000442429	0.00116283	TRUE	lncRNA:CR46258	ncRNA	3.51339	3.9382	5.85056	4.9874	3.19427	1.71318	4.40094	1.87382	0	0	0	0	0	5	5	10	6	1	9	1	0	0	0	0	0
FBgn0267763	3.6053	2.77622	0.697784	0.000278042	0.000763371	TRUE	lncRNA:CR46094	ncRNA	3.63494	6.82113	6.29091	8.33107	12.2678	7.07261	7.27026	0	3.09483	0	0	0	0	9	8	11	15	8	10	0	3	0	0	0	0
FBgn0033301	164.273	2.77331	0.21675	2.29878e-37	1.42606e-35	TRUE	CG12780	protein_coding	12.7737	480.202	250.347	410.344	306.907	224.802	382.998	32.7067	48.0308	34.8683	56.1838	63.0231	58.6797	640	320	539	373	248	532	36	46	35	63	34	51
FBgn0037151	215.991	2.77167	0.25218	4.96726e-28	1.49909e-26	TRUE	CG7130	protein_coding	10.9763	231.529	621.978	577.82	674.101	422.009	496.143	64.8366	105.025	55.0004	45.3497	105.934	49.8164	304	788	763	828	487	676	69	103	56	52	57	44
FBgn0038009	96.0108	2.77094	0.408545	1.57676e-11	1.14542e-10	TRUE	CG17738	protein_coding	6.74065	47.0721	508.46	222.995	296.747	249.296	159.448	20.7836	63.8779	26.964	24.1747	25.9119	28.8829	63	651	292	360	273	222	23	61	27	27	14	25
FBgn0262608	61.1598	2.76661	0.364516	4.26755e-14	3.96168e-13	TRUE	CG43134	protein_coding	7.55257	173.661	162.046	102.915	255.919	95.3458	111.438	18.9639	23.774	25.4239	6.77761	20.2145	25.2679	217	176	116	249	98	128	25	27	20	9	13	26
FBgn0034187	63.8381	2.762	0.305196	2.07123e-19	3.09852e-18	TRUE	CG6967	protein_coding	9.00943	94.3756	222.967	174.606	146.893	107.151	143.996	7.70797	33.0301	21.4098	10.3161	35.3089	18.002	124	281	230	182	128	193	8	33	22	12	19	16
FBgn0265880	13.0982	2.76009	0.410947	1.47073e-10	9.7338e-10	TRUE	lncRNA:CR44669	ncRNA	6.40838	23.3104	12.5292	13.6838	21.37	23.4654	19.4673	0.911431	0	3.97943	4.44901	1.85497	2.29604	31	16	18	26	26	27	1	0	4	5	1	2
FBgn0262528	39.1642	2.75711	0.408579	2.75242e-11	1.95763e-10	TRUE	CG43082	protein_coding	6.65924	58.8551	123.064	89.6631	185.449	58.5736	106.414	23.2006	11.6154	15.3828	7.53465	1.78292	21.0279	85	161	109	220	60	149	27	11	15	8	1	17
FBgn0053137	12.2929	2.75296	0.443609	1.86211e-09	1.09685e-08	TRUE	CG33137	protein_coding	6.0094	18.2496	37.0454	23.4713	18.756	22.6993	19.013	4.67163	7.16978	0.984477	0	1.85864	2.26859	24	47	31	23	26	26	5	7	1	0	1	2
FBgn0027788	40.5179	2.75003	0.300989	1.23643e-19	1.87844e-18	TRUE	Hey	protein_coding	9.06584	77.2759	108.633	122.083	123.064	48.1775	85.4621	8.62221	13.051	22.4088	16.3693	5.57145	10.1318	101	137	161	152	57	115	9	13	23	19	3	9
FBgn0270926	2536.48	2.74712	0.268294	1.36467e-24	3.06522e-23	TRUE	AsnS	protein_coding	10.2362	2347.85	8552.92	6568.6	6935.83	4993.54	5528.62	723.025	1203.81	548.316	469.266	1335.24	647.133	3068	10784	8662	8569	5915	7435	754	1200	563	545	719	575
FBgn0267080	14.7251	2.74684	0.48087	2.59662e-08	1.32613e-07	TRUE	lncRNA:CR45524	ncRNA	5.56666	19.8434	9.49131	33.3404	26.8002	31.7067	23.6168	2.84332	0	2.93592	5.20427	3.71587	2.25857	26	12	44	33	37	32	3	0	3	6	2	2
FBgn0015351	267.796	2.73523	0.175807	1.7946e-54	4.38358e-52	TRUE	CG14906	protein_coding	15.5423	417.283	803.917	633.723	759.69	475.431	654.144	80.0816	92.7229	102.509	73.4556	111.451	93.5709	546	1015	836	937	559	883	84	92	105	85	60	83
FBgn0086265	42.7	2.73369	0.502661	6.69296e-08	3.25042e-07	TRUE	psd	protein_coding	5.39922	47.8308	110.19	84.8379	128.544	84.8395	119.594	0	39.175	6.2363	9.19887	11.8692	2.40072	62	137	108	163	107	163	0	39	6	10	6	2
FBgn0033830	1140.57	2.7254	0.279779	2.21248e-22	4.20264e-21	TRUE	CG10814	protein_coding	9.73153	3896.73	5100.58	1618.75	3393.99	1308.66	2139.44	407.431	557.928	418.265	383.791	221.016	497.829	5095	6435	2135	4190	1545	2882	426	555	429	445	119	442
FBgn0264697	13.0113	2.72042	0.441538	4.73129e-09	2.64631e-08	TRUE	lncRNA:CR43966	ncRNA	5.85636	16.2859	11.5297	16.8881	15.9165	20.2213	17.8315	0.86875	0	3.05664	4.64291	0	2.42596	23	15	21	19	21	25	1	0	3	5	0	2
FBgn0266391	2.51398	2.70518	0.706263	6.27617e-05	0.000192496	TRUE	lncRNA:CR45031	ncRNA	4.00218	3.55511	1.53886	6.40647	3.34697	3.84023	1.42637	0	0	0	0	0	0	5	2	8	4	4	2	0	0	0	0	0	0
FBgn0052241	1827.23	2.70436	0.707599	0.000338254	0.000910456	TRUE	CG32241	protein_coding	3.58409	195.758	4779.49	5704.4	9835.87	4752.33	4721.93	114.68	2298.49	91.6775	108.722	22.288	141.947	256	6031	7524	12140	5605	6364	120	2285	94	126	12	126
FBgn0004588	66.8451	2.70202	0.521067	3.87608e-07	1.69154e-06	TRUE	Eig71Ea	protein_coding	5.07495	69.5028	327.273	179.437	131.056	147.872	214.778	15.3662	73.2902	12.9813	7.16144	3.70202	20.7909	93	419	235	159	162	299	17	70	13	8	2	18
FBgn0038353	3472.64	2.69434	0.3743	6.23571e-13	5.16056e-12	TRUE	CG5399	protein_coding	7.19523	4726.88	8528.93	8357.75	9104.41	6584.6	7918.56	990.361	1143.87	455.526	368.892	2730.63	559.313	6617	11143	11244	11476	7802	10846	1023	1136	453	431	1432	488
FBgn0264831	3.37064	2.69144	0.618832	8.48361e-05	0.000254704	TRUE	lncRNA:CR44039	ncRNA	3.93031	4.58816	9.51001	9.09798	12.1528	4.23893	4.45208	2.86723	0	0	0	1.85733	0	6	12	12	15	5	6	3	0	0	0	1	0
FBgn0046999	356.594	2.69067	0.65606	3.76529e-05	0.000119494	TRUE	CG6429	protein_coding	4.12143	97.4369	678.497	742.835	779.545	1453.34	738.173	55.3344	153.181	53.0782	24.4482	94.7854	37.3848	128	860	981	957	1673	1007	59	150	54	28	51	33
FBgn0033645	7.18833	2.68695	0.48983	1.58769e-07	7.31087e-07	TRUE	CG13196	protein_coding	5.24209	8.41948	24.591	18.2007	25.8952	19.3975	10.4156	3.8387	1.00254	0	2.58184	3.71404	3.37557	11	31	24	32	23	14	4	1	0	3	2	3
FBgn0031756	85.7015	2.68438	0.351981	3.27175e-14	3.07376e-13	TRUE	CG13992	protein_coding	7.58709	94.7143	285.858	290.252	308.15	166.318	171.16	22.109	69.1718	19.478	16.3535	42.7397	19.1364	124	361	383	381	198	230	23	69	20	19	23	17
FBgn0001224	65776.2	2.67941	0.294231	9.08372e-20	1.39358e-18	TRUE	Hsp23	protein_coding	9.09939	81250.9	226179	186597	204372	135963	154753	20153.9	55166.9	19969.3	17274.9	11162.7	20962.6	106472	285995	246264	251614	158559	209752	21275	54457	20401	19910	6008	18560
FBgn0267126	7.58393	2.67234	0.508338	5.10334e-07	2.18039e-06	TRUE	lncRNA:CR45566	ncRNA	5.02239	18.0011	18.7736	12.9454	21.3959	8.1636	12.956	1.8161	2.08886	0	0.892142	7.41383	1.15094	24	24	17	26	9	18	2	2	0	1	4	1
FBgn0033124	134.124	2.66781	0.302368	1.30962e-18	1.83781e-17	TRUE	Tsp42Ec	protein_coding	8.80491	199.346	394.975	300.131	364.318	281.64	328.352	39.9327	41.4118	42.0267	27.7008	70.5928	56.4122	261	499	396	449	330	444	42	41	43	32	38	50
FBgn0053926	95.017	2.66721	0.278658	1.34179e-21	2.40829e-20	TRUE	CG33926	protein_coding	9.54648	352.365	216.768	205.059	216.031	124.86	118.48	27.2085	35.7903	25.6537	18.3809	37.4062	40.9684	461	277	276	267	144	162	30	35	26	21	20	36
FBgn0035922	19.2062	2.65939	0.437345	2.00515e-09	1.17315e-08	TRUE	Pex7	protein_coding	5.99739	22.551	49.3563	25.4421	75.619	22.4969	39.699	3.88784	4.09104	1.9834	3.50943	12.6422	7.66689	29	64	33	96	27	55	4	4	2	4	7	7
FBgn0063497	2389.84	2.65883	0.239231	1.08974e-28	3.47672e-27	TRUE	GstE3	protein_coding	11.1126	5098.22	6270.83	4515.08	6405.8	3583.13	4701.11	726.647	562.532	567.956	557.1	1665.04	572.364	6689	7939	5961	7875	4151	6393	771	553	579	640	896	506
FBgn0038315	1685.14	2.65027	0.373766	1.47764e-12	1.18158e-11	TRUE	CG14866	protein_coding	7.07657	4572.13	4879.14	3758.85	5333.44	3302.04	3332.3	524.279	1054.16	478.017	541.814	82.4201	918.835	5968	6151	4952	6581	3906	4480	546	1047	490	627	45	815
FBgn0035031	1.65161	2.64908	0.759912	0.000485356	0.00126459	TRUE	CG13587	protein_coding	3.48871	1.52715	5.53924	3.03139	6.4933	2.56411	1.47798	0	0	0	0	0	0	2	7	4	8	3	2	0	0	0	0	0	0
FBgn0036320	10.3754	2.64532	0.70387	4.65988e-05	0.000145618	TRUE	CG10943	protein_coding	4.07206	2.29254	3.9598	9.09626	4.86519	5.95668	12.5906	0	0	0	0	1.85754	0	3	5	12	6	7	17	0	0	0	0	1	0
FBgn0259187	2.07276	2.64405	0.801439	0.00318861	0.00691079	TRUE	Ir60d	protein_coding	2.94894	1.5303	7.92983	12.1326	8.09575	6.75978	0	0	0	0	0.86142	0	0	2	10	16	10	8	0	0	0	0	1	0	0
FBgn0052557	8.67572	2.64213	0.657684	9.03341e-05	0.000269554	TRUE	Mco4	protein_coding	3.91519	4.59283	42.8395	15.1676	21.0376	15.1735	23.0686	0.960033	2.00449	0	0	11.1419	0	6	54	20	26	18	31	1	2	0	0	6	0
FBgn0039429	18.6627	2.63913	0.509182	3.02685e-07	1.34085e-06	TRUE	CG14238	protein_coding	5.12177	35.2045	57.9006	53.8419	47.7516	32.9136	20.0804	8.6325	0	0.973814	2.5827	20.4277	2.25073	46	73	71	59	39	27	9	0	1	3	11	2
FBgn0037581	266.819	2.6379	0.180499	2.91496e-48	4.1807e-46	TRUE	CG7352	protein_coding	14.5975	347.231	322.693	357.826	323.166	402.949	310.408	48.796	69.3228	76.019	52.5833	31.5681	39.4676	454	407	472	399	476	418	51	69	78	61	17	35
FBgn0053109	5.73947	2.63716	0.616189	5.52413e-05	0.000170669	TRUE	CG33109	protein_coding	4.03227	10.6929	23.746	29.5583	13.7938	4.26728	8.13486	0.950778	2.02009	0	4.32825	3.71541	0	14	30	39	17	5	11	1	2	0	5	2	0
FBgn0033720	3.41781	2.63284	0.711952	7.8195e-05	0.000235807	TRUE	CG13160	protein_coding	3.94987	2.29772	0.793786	9.1033	1.61783	2.52417	3.72541	0	0	0	0	0	0	3	1	12	2	3	5	0	0	0	0	0	0
FBgn0265795	4.62232	2.63075	0.678133	2.49279e-05	8.15973e-05	TRUE	lncRNA:CR44584	ncRNA	4.21545	2.92946	3.87882	2.33282	5.80962	0.936768	3.57112	0	0	0	0	0	0	4	5	3	7	1	5	0	0	0	0	0	0
FBgn0266626	21.151	2.62952	0.536065	1.05877e-06	4.30588e-06	TRUE	asRNA:CR45133	ncRNA	4.88039	18.0243	54.2876	50.2723	41.2072	36.057	56.8081	2.10963	4.4518	3.59685	1.27264	23.2723	3.32161	32	93	90	69	52	104	3	6	1	2	8	4
FBgn0265064	64.4514	2.62493	0.266102	9.31933e-23	1.84183e-21	TRUE	lncRNA:CR44175	ncRNA	9.81908	99.6727	120.905	110.037	141.187	149.869	94.9249	22.2931	18.2553	14.7843	33.4016	1.90056	13.7691	131	153	147	173	170	131	24	18	15	38	1	12
FBgn0261930	118.77	2.62328	0.42621	7.80665e-10	4.77657e-09	TRUE	vnd	protein_coding	6.14881	142.339	375.945	191.544	375.771	123.871	210.199	35.9243	22.9657	18.8373	24.627	88.8328	10.7566	176	458	241	456	143	274	39	24	19	28	50	10
FBgn0085485	49.4599	2.62194	0.402309	9.34005e-11	6.30453e-10	TRUE	CG34456	protein_coding	6.47726	51.7121	104.052	106	137.802	145.731	168.959	13.085	30.7197	3.93734	5.25053	37.1735	15.8785	68	132	140	169	167	231	14	30	4	6	20	14
FBgn0000158	81.7931	2.61847	0.253422	6.98883e-25	1.61383e-23	TRUE	bam	protein_coding	10.3008	93.3719	220.507	238.12	177.239	160.315	125.701	26.861	29.0823	25.3175	30.1284	35.2839	12.3784	122	278	314	219	190	169	28	29	26	35	19	11
FBgn0038243	795.859	2.61735	0.250445	1.47717e-25	3.61386e-24	TRUE	CG8066	protein_coding	10.4492	1349.25	1959.73	1553.33	1836.11	1013.57	1468.37	191.944	208.322	161.863	152.214	532.615	193.016	1700	2372	1969	2188	1132	1946	201	199	162	168	277	179
FBgn0031277	20.1226	2.61596	0.627665	3.00539e-05	9.69526e-05	TRUE	CG13947	protein_coding	4.17306	2.26549	14.1244	55.3631	31.9767	56.2975	52.1093	0	1.0374	0	7.96796	12.9998	1.14301	3	18	73	39	63	72	0	1	0	9	7	1
FBgn0032437	1.37399	2.61286	0.744443	0.000902142	0.00221227	TRUE	CR17024	pseudogene	3.31939	1.52902	7.13079	3.79057	2.43128	4.24452	2.22457	0	0	0	0.863387	0	0	2	9	5	3	5	3	0	0	0	1	0	0
FBgn0030868	1.23094	2.60965	0.735312	0.000898317	0.00220565	TRUE	CG12986	protein_coding	3.32058	3.03097	3.93119	3.02969	4.08995	3.53878	2.18043	0	0	0.988611	0	0	0	4	5	4	5	4	3	0	0	1	0	0	0
FBgn0266044	19.7835	2.6048	0.354815	4.66975e-13	3.91914e-12	TRUE	lncRNA:CR44809	ncRNA	7.23458	41.689	58.9809	40.898	57.2438	36.2333	39.9936	10.1832	4.12569	1.97653	7.92455	14.8672	4.55339	55	75	54	70	41	55	11	4	2	9	8	4
FBgn0031741	154.662	2.59487	0.193578	9.22037e-41	7.2799e-39	TRUE	CG11034	protein_coding	13.3686	126.265	182.719	185.067	175.057	152.781	142.092	29.8206	26.6938	20.1404	24.5771	32.2673	23.1357	162	231	244	218	183	190	31	26	21	29	17	20
FBgn0041238	2.74532	2.59277	0.665169	0.000431068	0.00113602	TRUE	Gr58b	protein_coding	3.52029	3.05893	8.71797	6.82358	8.10133	11.0181	2.96848	0.955957	1.00566	1.95034	0	0	0	4	11	9	10	13	4	1	1	2	0	0	0
FBgn0039454	3.62209	2.58831	0.660721	0.00030262	0.000824191	TRUE	CG14247	protein_coding	3.61305	0	12.6618	6.06287	7.30451	8.54466	10.3473	0.949903	0	0.977738	0.866149	0	1.12854	0	16	8	9	10	14	1	0	1	1	0	1
FBgn0032281	1.81144	2.58217	0.739478	0.00135867	0.00320772	TRUE	CG17107	protein_coding	3.20329	4.18808	3.60846	6.22483	5.66153	2.977	4.28265	0	0	1.44046	0	0	0	5	5	6	7	3	6	0	0	2	0	0	0
FBgn0003313	7.79638	2.56978	0.611636	7.18333e-05	0.000217925	TRUE	sala	protein_coding	3.97013	2.74527	10.322	4.89734	14.4131	18.404	3.73317	0	0	0.699144	4.07031	1.3327	0	5	8	9	12	16	7	0	0	1	2	1	0
FBgn0038727	1798.57	2.56855	0.190324	1.70198e-41	1.39304e-39	TRUE	CG7432	protein_coding	13.4938	3770.88	5866.17	3881.1	3601	2731.04	3286.65	480.018	750.482	471.73	570.599	640.606	890.53	4924	7391	5117	4453	3248	4411	499	750	485	664	345	792
FBgn0033880	46.4285	2.56622	0.328964	8.80616e-15	8.68012e-14	TRUE	CG6553	protein_coding	7.75541	184.164	134.631	68.2216	87.5754	88.5082	88.8703	16.199	22.1816	9.76472	17.289	5.57265	29.3155	241	170	90	108	104	120	17	22	10	20	3	26
FBgn0266893	5.53595	2.56218	0.577396	4.94756e-05	0.000154074	TRUE	lncRNA:CR45353	ncRNA	4.05809	5.31655	5.5125	3.78568	9.79672	8.77322	9.48456	0.93085	0	0	0	1.85866	2.27166	7	7	5	12	10	13	1	0	0	0	1	2
FBgn0038366	586.717	2.55809	0.535496	2.47214e-06	9.50723e-06	TRUE	CG4576	protein_coding	4.71041	754.915	1955.97	1726.17	1794.99	1053.31	1872.65	230.624	750.12	69.088	48.1549	57.5644	80.9826	986	2465	2276	2219	1251	2515	240	749	71	56	31	72
FBgn0000052	4760.96	2.55683	0.187762	3.20927e-42	2.74155e-40	TRUE	Pfas	protein_coding	13.6162	12397.5	13734.7	9705.25	11649.8	6753.23	8971.63	1484.95	2569.28	1383.92	1313.04	2174.43	1560.43	16171	17280	12784	14393	8036	12013	1543	2572	1425	1530	1170	1390
FBgn0040262	30.7929	2.53764	0.565846	7.26462e-06	2.59465e-05	TRUE	Ugt37C2	protein_coding	4.48578	51.983	109.376	44.4054	48.3782	53.955	53.602	6.98501	2.06685	0	0.886789	36.3102	3.47571	68	139	58	59	62	71	8	2	0	1	19	3
FBgn0051793	737.334	2.53662	0.162609	7.84721e-55	2.01107e-52	TRUE	CG31793	protein_coding	15.5952	1512.44	2072.57	1276.22	1853.27	1150.46	1469.73	201.296	276.872	204.614	245.718	327.745	329.788	1963	2602	1679	2286	1365	1962	211	278	209	290	177	295
FBgn0040261	3.77367	2.53549	0.721153	0.00113869	0.00272981	TRUE	Ugt37E1	protein_coding	3.25381	9.18039	26.1644	3.79129	4.85838	9.30254	3.71471	1.91521	3.01281	0	0	0	0	12	33	5	6	11	5	2	3	0	0	0	0
FBgn0031747	311.329	2.51801	0.674781	0.000359431	0.000961496	TRUE	CG9021	protein_coding	3.56821	95.9547	509.055	899.502	1295.37	1533.13	647.627	14.3609	495.633	24.4982	13.0103	11.1883	15.8428	126	654	1189	1611	1817	879	15	491	25	15	6	14
FBgn0266070	2.79109	2.5068	0.744298	0.000360936	0.000964531	TRUE	lncRNA:CR44823	ncRNA	3.56711	2.1957	3.87816	0.777968	0.830107	7.49859	4.99916	0	0	0	0	0	0	3	5	1	1	8	7	0	0	0	0	0	0
FBgn0030098	2.90348	2.50638	0.709906	0.000585418	0.00149735	TRUE	CG12057	protein_coding	3.43828	0.717941	17.1127	2.49843	3.57489	3.22566	4.25806	0.891393	0	0	0	1.74786	0	1	23	3	4	4	6	1	0	0	0	1	0
FBgn0264448	61.6615	2.50505	0.266414	7.51464e-21	1.26319e-19	TRUE	asRNA:CR43866	ncRNA	9.36626	237.227	149.101	139.531	106.846	70.0806	124.914	28.7641	26.085	21.4273	16.361	25.9992	21.3843	310	188	184	132	83	168	30	26	22	19	14	19
FBgn0266157	1.6788	2.5043	0.71966	0.000591661	0.00151085	TRUE	lncRNA:CR44863	ncRNA	3.43541	2.99002	3.12467	3.81721	7.41738	0.912476	2.15523	0.904147	0	0	0	0	0	4	4	5	9	1	3	1	0	0	0	0	0
FBgn0085398	6.95221	2.50141	0.501959	1.67138e-06	6.57655e-06	TRUE	ppk9	protein_coding	4.78957	22.2231	22.1749	17.4664	20.2672	6.76716	11.9117	0	3.01492	3.90203	1.72504	1.85982	4.50891	29	28	23	25	8	16	0	3	4	2	1	4
FBgn0038718	22.8391	2.49511	0.731169	0.000335028	0.000902239	TRUE	CG17752	protein_coding	3.58659	10.7119	30.9259	18.9572	43.7177	32.9562	49.7966	0	0	0.974225	2.58434	5.57141	4.50279	14	39	25	54	39	67	0	0	1	3	3	4
FBgn0265551	44.0851	2.48997	0.380685	8.27824e-11	5.60961e-10	TRUE	lncRNA:CR44401	ncRNA	6.49546	54.1885	34.802	57.5882	36.5451	47.9848	56.8302	15.1653	3.03774	2.93584	17.3469	1.85793	2.25853	71	44	76	45	56	77	16	3	3	20	1	2
FBgn0063127	313.576	2.48826	0.716915	0.00132811	0.00314487	TRUE	lncRNA:CR33938	ncRNA	3.20983	24.9643	1754.73	1113.23	976.195	701.597	501.126	36.8588	443.918	30.6955	24.7288	5.57355	25.0978	33	2234	1469	1192	789	691	40	429	31	28	3	22
FBgn0265808	5.36151	2.48533	0.553605	3.81015e-05	0.000120722	TRUE	lncRNA:CR44597	ncRNA	4.1187	5.26444	5.48194	9.88169	6.57482	5.41324	11.5377	0	0	0.994791	2.6689	0	1.14784	7	7	13	8	6	16	0	0	1	3	0	1
FBgn0265827	7.7017	2.48107	0.477335	5.76897e-07	2.44407e-06	TRUE	lncRNA:CR44616	ncRNA	4.99879	16.0932	31.0204	13.2332	29.8873	11.2537	17.8513	4.43095	6.33049	3.02415	1.81961	0	2.35685	22	40	17	36	12	25	5	6	3	2	0	2
FBgn0262683	2.25619	2.48045	0.722617	0.00111169	0.00267124	TRUE	CG43153	protein_coding	3.26062	0.761916	7.10654	3.02951	8.95129	6.05307	2.9388	0.941183	1.01833	0	0	0	0	1	9	4	11	7	4	1	1	0	0	0	0
FBgn0266088	19.4844	2.47617	0.38768	2.8262e-10	1.81744e-09	TRUE	lncRNA:CR44830	ncRNA	6.30802	14.5348	56.2897	59.1432	55.0657	27.9168	41.5979	3.82944	13.0582	4.87288	6.03342	11.1432	3.37795	19	71	78	68	33	56	4	13	5	7	6	3
FBgn0028514	38.5591	2.47607	0.350316	2.12677e-12	1.67833e-11	TRUE	CG4793	protein_coding	7.02591	33.6947	149.208	62.194	58.2269	74.85	101.323	12.5034	9.00697	21.3995	13.7508	7.42737	13.4935	44	188	82	72	89	136	13	9	22	16	4	12
FBgn0003374	7.36659	2.47012	0.586358	4.62402e-05	0.000144748	TRUE	Sgs4	protein_coding	4.07386	10.6885	14.2418	20.4611	22.7303	15.3961	13.2969	2.84745	4.04576	3.91218	0	1.85783	0	14	18	27	28	18	18	3	4	4	0	1	0
FBgn0013755	10.0828	2.46688	0.495801	1.25003e-06	5.01584e-06	TRUE	Bro	protein_coding	4.84754	9.9069	17.3751	33.3261	28.4745	34.5528	18.3769	4.70966	0	1.96233	9.57844	1.85836	2.2627	13	22	44	35	40	25	5	0	2	11	1	2
FBgn0052368	121.62	2.46679	0.324344	3.14475e-14	2.95621e-13	TRUE	CG32368	protein_coding	7.59222	415.338	374.08	105.406	278.647	177.219	209.712	45.1689	32.466	27.9657	26.8664	66.6249	65.8689	556	479	138	338	194	292	50	31	28	30	36	57
FBgn0032551	88.7327	2.4647	0.26576	2.23615e-20	3.61507e-19	TRUE	CG18636	protein_coding	9.25042	207.056	110.062	122.035	128.956	91.1433	140.648	17.1398	46.4059	22.4654	14.7021	11.1456	23.6828	271	139	161	159	107	190	18	46	23	17	6	21
FBgn0043575	732.737	2.46367	0.19206	1.21295e-37	7.67695e-36	TRUE	PGRP-SC2	protein_coding	12.8234	1220.89	1701.22	2296.49	1788.14	1243.73	1379.09	254.353	345.984	308.071	301.265	178.401	309.979	1602	2154	3032	2198	1440	1876	270	340	314	346	96	274
FBgn0031930	9.07592	2.46071	0.527162	9.9039e-06	3.4631e-05	TRUE	CG7025	protein_coding	4.41926	9.1756	15.8488	10.6141	8.9129	6.78522	6.67667	2.86626	1.00611	0	0.863012	0	2.2533	12	20	14	11	8	9	3	1	0	1	0	2
FBgn0267568	7.8238	2.46004	0.540212	1.02935e-05	3.58391e-05	TRUE	asRNA:CR45908	ncRNA	4.41092	6.85561	39.4713	13.6318	21.1634	6.06067	17.6219	0.940277	0	1.96376	5.23045	3.7169	3.39584	9	50	18	26	7	24	1	0	2	6	2	3
FBgn0263746	6.45282	2.44902	0.639075	5.67612e-05	0.000174881	TRUE	CR43671	pseudogene	4.02589	3.06026	5.55026	1.51653	4.04844	4.22746	3.71514	0	0	0	0.86168	0	0	4	7	2	5	5	5	0	0	0	1	0	0
FBgn0038523	1.72495	2.44809	0.801825	0.00590357	0.0119208	TRUE	CG7587	protein_coding	2.75309	0	3.14693	2.27181	7.3563	11.4635	5.82294	0	0	0.987579	0	0	0	0	4	3	9	13	8	0	0	1	0	0	0
FBgn0036972	3.37338	2.44427	0.669062	0.00064004	0.0016222	TRUE	CR6434	pseudogene	3.41405	9.89329	13.4089	3.786	4.07393	3.47904	7.32614	0	0	1.96662	0	1.85857	1.13321	13	17	5	5	4	10	0	0	2	0	1	1
FBgn0263080	27.7058	2.44046	0.409147	3.45459e-09	1.96312e-08	TRUE	CG43348	protein_coding	5.90839	28.2322	97.1249	54.3387	86.5558	34.3734	81.567	17.0065	2.19558	11.7024	12.6943	9.28936	8.95363	40	132	69	101	34	114	19	2	11	15	5	7
FBgn0085438	118.278	2.43659	0.218348	8.28376e-29	2.65369e-27	TRUE	CG34409	protein_coding	11.137	215.877	319.731	359.478	287.22	214.037	227.007	61.4597	73.1471	39.9067	49.8951	25.9975	35.9991	282	403	474	355	254	305	64	73	41	58	14	32
FBgn0020546	11.5149	2.43558	0.493434	1.08968e-06	4.41778e-06	TRUE	lncRNA:iab4	ncRNA	4.87471	30.0453	20.9084	18.2008	42.0417	16.776	17.5536	3.48772	11.8889	3.29955	0	3.00834	0.975524	31	18	19	37	15	17	8	13	3	0	1	2
FBgn0266857	5.01168	2.4342	0.655503	0.000434062	0.00114353	TRUE	lncRNA:CR45318	ncRNA	3.51846	0.764312	3.96049	14.4031	4.86415	7.65127	5.18686	0	0	0	0.864003	1.85749	1.12725	1	5	19	6	9	7	0	0	0	1	1	1
FBgn0267587	7.58762	2.4341	0.519795	5.99537e-06	2.17058e-05	TRUE	asRNA:CR45925	ncRNA	4.52655	13.8752	30.2295	11.695	19.9355	17.8481	12.1372	0.885083	4.22166	8.06933	0.910846	0	1.18024	19	39	15	24	19	17	1	4	8	1	0	1
FBgn0035737	311.42	2.43385	0.511655	2.37328e-06	9.14282e-06	TRUE	Cpr65Ec	protein_coding	4.71872	28.083	1907.18	807.16	372.495	1167.22	361.443	91.9751	174.881	49.3393	89.6037	144.97	152.316	37	2423	1066	456	1327	496	99	170	50	102	78	134
FBgn0030332	1136.46	2.42894	0.203074	5.73391e-33	2.621e-31	TRUE	CG9360	protein_coding	11.9603	939.492	2305.85	1739.42	2116.81	1477.79	1758.85	273.882	292.864	247.252	301.206	494.146	265.121	1230	2913	2295	2609	1732	2378	288	290	253	348	266	235
FBgn0034880	14.2591	2.4191	0.446859	9.98479e-08	4.73581e-07	TRUE	ItgaPS5	protein_coding	5.327	13.0202	38.1012	39.4416	30.7253	18.4876	32.0489	5.77442	7.00193	7.77962	0.859088	3.71358	2.24851	17	48	52	38	22	43	6	7	8	1	2	2
FBgn0031973	1671.21	2.41197	0.229498	7.99074e-26	1.98916e-24	TRUE	Spn28Dc	protein_coding	10.5073	2296.4	4258.69	4344.35	4282.19	3694.15	3346.21	675.815	1220.18	457.804	398.744	733.556	547.021	3001	5370	5729	5290	4374	4501	705	1216	470	463	395	486
FBgn0004173	3056.05	2.40995	0.207766	4.12386e-31	1.59971e-29	TRUE	Mst84Db	protein_coding	11.5999	3462.47	3175.96	3487.67	3919.05	5001.25	3794.15	606.085	354.786	844.484	1087.84	666.541	612.919	4630	4065	4570	4756	5485	5280	670	339	846	1216	360	531
FBgn0259237	14.0148	2.40488	0.677598	0.000310123	0.000841692	TRUE	CG42335	protein_coding	3.60669	1.53155	30.9521	8.34306	8.896	10.9344	66.3033	0.961715	0	0.972741	0	9.28425	3.37347	2	39	11	11	13	89	1	0	1	0	5	3
FBgn0041241	8.8374	2.40186	0.440223	1.15002e-07	5.40373e-07	TRUE	Gr47b	protein_coding	5.30127	16.0585	14.265	33.3592	17.014	16.9562	27.4542	0.955724	9.05269	1.95054	4.3142	1.85733	2.25309	21	18	44	21	20	37	1	9	2	5	1	2
FBgn0036772	532.296	2.40063	0.224109	9.41399e-27	2.54618e-25	TRUE	CG5290	protein_coding	10.7072	618.779	1439.75	1347.8	1415.98	936.7	1083.37	175.075	362.235	171.185	201.086	142.976	197.896	808	1814	1777	1751	1114	1454	182	362	176	234	77	176
FBgn0265836	1.48562	2.40035	0.803436	0.00786227	0.01536	TRUE	CG44625	protein_coding	2.65793	5.21736	10.144	0	4.12574	3.66678	3.58728	0	0	0	0	0	0	7	13	0	5	4	5	0	0	0	0	0	0
FBgn0045473	1.18003	2.39753	0.752102	0.00242913	0.00541888	TRUE	Gr85a	protein_coding	3.03203	2.29289	1.58417	4.54833	3.24284	3.40093	2.96375	0.953589	0	0	0	0	0	3	2	6	4	4	4	1	0	0	0	0	0
FBgn0033979	23.4868	2.39731	0.505325	2.31439e-06	8.92039e-06	TRUE	Cyp6a19	protein_coding	4.72383	30.6795	52.0171	53.2051	61.9705	28.135	47.999	8.99345	3.1412	1.01618	0	28.6731	4.09993	39	67	68	77	33	63	9	3	1	0	16	4
FBgn0053265	21.5586	2.39664	0.438681	6.55607e-08	3.19088e-07	TRUE	Muc68E	protein_coding	5.40293	8.42848	52.4121	23.516	28.2838	23.4728	28.357	5.78551	2.99624	0	8.58059	5.56991	3.37086	11	66	31	35	28	38	6	3	0	10	3	3
FBgn0037996	3.56808	2.3931	0.689666	0.00116104	0.00277744	TRUE	CG4830	protein_coding	3.24828	3.82637	10.3105	12.8915	12.1411	3.37676	8.92327	0.958942	0	0	0.861026	5.57123	0	5	13	17	15	4	12	1	0	0	1	3	0
FBgn0263049	59.6625	2.38886	0.232527	1.4228e-24	3.18663e-23	TRUE	lncRNA:let7C	ncRNA	10.2322	99.5333	178.538	135.758	140.75	127.131	157.858	19.2195	46.0672	18.488	23.2169	20.426	26.9939	130	225	179	174	151	212	20	46	19	27	11	24
FBgn0031389	465.812	2.38621	0.199611	6.68915e-33	3.03106e-31	TRUE	CG4259	protein_coding	11.9475	1504.47	1523.66	729.128	1206.58	656.437	965.933	178.961	250.925	192.491	180.056	197.798	228.467	1738	1515	808	1178	650	1075	192	221	181	202	100	220
FBgn0010357	1.60398	2.37926	0.776519	0.00170268	0.00392422	TRUE	betaTry	protein_coding	3.13772	0	0.867139	2.49348	4.45891	5.66325	3.23249	0	0	0	0	0	0	0	1	3	5	6	4	0	0	0	0	0	0
FBgn0037224	7.34644	2.373	0.465457	8.31979e-07	3.44721e-06	TRUE	TwdlF	protein_coding	4.92771	24.4607	20.5969	11.3712	16.2116	10.1955	22.2362	5.72475	4.02881	3.90378	0.863745	0	2.25419	32	26	15	20	12	30	6	4	4	1	0	2
FBgn0004389	1.33621	2.37166	0.747305	0.00417853	0.008767	TRUE	bnk	protein_coding	2.86436	3.05515	3.95772	3.03164	2.43415	5.9737	3.69781	1.90168	0	0	0	0	0	4	5	4	3	7	5	2	0	0	0	0	0
FBgn0034819	7.87136	2.37148	0.626825	0.000224459	0.000627426	TRUE	CG9877	protein_coding	3.68977	0	15.5847	18.4242	14.0468	15.6695	12.1792	0.897528	0	3.00533	2.70007	0	2.32455	0	20	24	17	17	17	1	0	3	3	0	2
FBgn0038595	381.832	2.371	0.190552	1.70009e-35	9.32546e-34	TRUE	CG7142	protein_coding	12.4344	689.686	1154.56	1061.4	985.305	856.727	702.496	164.318	214.316	188.258	133.774	167.163	162.242	902	1457	1400	1216	1010	947	172	213	193	155	90	144
FBgn0050471	25.2564	2.37015	0.588041	6.83863e-05	0.000208317	TRUE	CG30471	protein_coding	3.98183	27.5628	65.8603	56.1233	45.2994	107.772	41.6974	8.64845	32.0477	0	3.43963	0	4.49903	36	83	74	56	128	56	9	32	0	4	0	4
FBgn0013772	1020.98	2.36927	0.209567	1.26211e-29	4.3174e-28	TRUE	Cyp6a8	protein_coding	11.3034	1919.13	2856.53	1735	2286.84	1223.87	2590.04	378.625	451.569	284.43	269.571	584.989	409.71	2508	3602	2288	2825	1449	3484	395	450	292	313	315	364
FBgn0014033	428.512	2.36432	0.156793	2.43961e-51	4.76731e-49	TRUE	Sr-CI	protein_coding	15.073	784.652	1005.99	797.068	979.796	656.471	707.796	155.564	235.481	149.896	116.998	128.131	154.123	1025	1268	1051	1211	779	951	162	235	154	136	69	137
FBgn0033067	9.73249	2.35872	0.541326	2.07331e-05	6.86406e-05	TRUE	CG11211	protein_coding	4.25685	12.1559	31.5068	28.0133	21.2203	9.63886	26.2802	3.72687	6.15882	0	4.38414	1.85867	3.40627	16	40	37	26	11	36	4	6	0	5	1	3
FBgn0033798	32.0918	2.35683	0.317502	1.66172e-13	1.47016e-12	TRUE	CG15870	protein_coding	7.37353	34.1801	88.2031	41.6422	62.0426	69.2887	69.3189	13.966	8.21615	6.90142	14.0357	14.8693	9.08582	45	112	55	76	79	95	15	8	7	16	8	8
FBgn0036203	34.6321	2.35496	0.792807	0.000230902	0.000644242	TRUE	Muc68D	protein_coding	3.68256	3.83078	26.2036	3.03424	21.0133	26.8398	181.288	0	0	0.971842	2.57483	1.85667	1.12376	5	33	4	26	32	243	0	0	1	3	1	1
FBgn0267339	65.8947	2.35101	0.267288	1.79484e-18	2.48087e-17	TRUE	p38c	protein_coding	8.76949	165.083	183.757	137.207	132.962	88.4407	150.397	23.8363	27.2099	17.5722	20.7391	57.5827	20.2919	216	232	181	164	104	203	25	27	18	24	31	18
FBgn0010223	122.221	2.35064	0.269155	2.81929e-18	3.84255e-17	TRUE	Galphaf	protein_coding	8.71849	107.899	370.37	310.151	397.438	229.672	205.211	51.7735	46.1518	36.0373	53.3897	72.4266	46.1455	141	467	409	491	272	276	54	46	37	62	39	41
FBgn0266207	5.723	2.34938	0.574105	0.000101254	0.000300362	TRUE	lncRNA:CR44902	ncRNA	3.88757	6.86457	7.11395	15.1518	8.12734	2.5796	9.57792	0	0	2.93916	0	3.71626	1.13016	9	9	20	10	3	13	0	0	3	0	2	1
FBgn0266681	47.4314	2.34698	0.236853	6.02e-23	1.20655e-21	TRUE	asRNA:CR45171	ncRNA	9.86304	100.818	125.853	112.17	106.294	69.9853	91.7008	16.1629	25.2516	16.6154	16.4476	35.2964	10.1543	132	159	148	131	82	124	17	25	17	19	19	9
FBgn0039848	34.8313	2.34641	0.25583	8.18379e-20	1.26046e-18	TRUE	Loxl1	protein_coding	9.11072	84.1257	95.1111	54.5896	84.2472	58.4604	78.6784	15.2994	19.1034	9.7506	13.801	5.57188	20.2748	110	120	72	104	69	106	16	19	10	16	3	18
FBgn0053337	4.6079	2.34476	0.615621	0.000324833	0.000877808	TRUE	CG33337	protein_coding	3.59465	2.29641	17.4531	17.4427	12.1371	10.9589	9.67382	0	0	0.973455	4.30211	1.85699	3.37522	3	22	23	15	13	13	0	0	1	5	1	3
FBgn0014865	168.537	2.34359	0.35239	3.28038e-11	2.31418e-10	TRUE	Mtk	protein_coding	6.6334	301.427	191.385	244.309	477.41	878.363	330.653	55.6801	66.1244	60.1427	33.0179	90.598	136.29	454	253	285	558	881	461	66	63	58	34	52	106
FBgn0267549	9.9071	2.34191	0.464388	9.24831e-07	3.80671e-06	TRUE	asRNA:CR45889	ncRNA	4.90699	14.4253	37.7901	31.043	17.9665	21.9638	25.5184	3.71951	9.25218	2.95931	6.14575	1.85864	1.13629	19	48	41	22	25	35	4	9	3	7	1	1
FBgn0051560	1.76009	2.34089	0.80424	0.00937335	0.0178787	TRUE	CG31560	protein_coding	2.59813	3.05418	10.2867	0	11.3638	0.854893	5.17236	0.949534	0	0	0	0	0	4	13	0	14	1	7	1	0	0	0	0	0
FBgn0040554	13.175	2.33885	0.409663	2.03041e-08	1.04826e-07	TRUE	asRNA:CR17025	ncRNA	5.60939	16.8375	49.1774	29.5754	29.1354	21.9386	26.7762	5.75578	7.02001	4.8688	7.74744	0	3.37596	22	62	39	36	26	36	6	7	5	9	0	3
FBgn0264431	24.1034	2.33392	0.309372	9.64496e-14	8.69472e-13	TRUE	lncRNA:CR43849	ncRNA	7.44568	35.7569	27.5994	28.0148	29.3422	50.5221	31.4791	6.55166	2.04574	5.90261	10.4917	7.43458	4.53453	47	35	37	36	58	43	7	2	6	12	4	4
FBgn0035360	111.239	2.33007	0.285264	3.42242e-16	3.84082e-15	TRUE	CG1246	protein_coding	8.15743	92.8385	263.465	249.244	284.81	188.008	179.586	28.4956	38.8359	39.3993	33.842	74.8672	26.7961	126	339	331	349	218	250	30	39	40	37	38	24
FBgn0031538	1714.29	2.32824	0.143999	8.65899e-59	3.00813e-56	TRUE	CG3246	protein_coding	16.1667	3871.89	4176.8	3456.73	4177.56	2574.37	3184.83	664.044	973.766	607.299	545.78	711.325	713.988	5062	5269	4559	5158	3041	4289	694	969	623	633	383	634
FBgn0004629	6571.96	2.32739	0.217634	1.10228e-26	2.96082e-25	TRUE	Cys	protein_coding	10.6926	22629.7	15360.9	12942.2	12226.2	9375.12	14048.3	2627.23	4509.98	2416.68	1964.33	2620.46	2596.58	29965	19575	17066	14912	10494	19409	2861	4348	2437	2219	1411	2272
FBgn0265419	22.7923	2.32632	0.347582	3.3837e-11	2.38276e-10	TRUE	lncRNA:CR44331	ncRNA	6.62882	20.5974	72.7457	38.6861	74.5529	47.5753	44.4706	8.59307	13.1008	5.85906	10.3528	9.29294	7.87844	27	92	51	92	56	60	9	13	6	12	5	7
FBgn0031000	2.42535	2.32275	0.757344	0.00484623	0.00999355	TRUE	Muc18B	protein_coding	2.81708	0.782068	8.91541	5.43162	11.6264	3.49099	5.3026	0	3.09992	0	0	0	0	1	11	7	14	4	7	0	3	0	0	0	0
FBgn0083941	1.40805	2.32103	0.798032	0.00470436	0.00973438	TRUE	CG34105	protein_coding	2.82661	3.03692	2.36188	3.78573	4.89996	6.14987	0	0	0	0	0	0	0	4	3	5	6	7	0	0	0	0	0	0	0
FBgn0051901	346.919	2.31904	0.404087	9.22119e-09	4.98719e-08	TRUE	Mur29B	protein_coding	5.74447	104.08	641.648	716.622	629.696	592.537	501.226	104.536	87.2667	47.7193	37.8825	237.705	56.2702	136	809	945	778	702	674	109	87	49	44	128	50
FBgn0033697	52.8772	2.3176	0.60392	9.34279e-05	0.000278361	TRUE	Cyp6t3	protein_coding	3.90706	71.1557	114.185	107.676	16.1924	2.53552	52.0219	4.79032	6.02333	3.89712	0	33.4287	4.50297	93	144	142	20	3	70	5	6	4	0	18	4
FBgn0039777	1.17697	2.31734	0.77837	0.00321835	0.00697138	TRUE	Jon99Fii	protein_coding	2.94607	1.52655	1.58203	1.51551	2.43611	4.28263	4.42925	0	0	0	0	0	0	2	2	2	3	5	6	0	0	0	0	0	0
FBgn0085359	646.352	2.31443	0.224932	8.16613e-25	1.88013e-23	TRUE	CG34330	protein_coding	10.2858	818.528	1444.34	1510.06	1744.45	1278.69	1657.21	260.347	322.616	230.055	189.634	455.635	194.532	1076	1831	1989	2133	1461	2266	278	314	233	216	246	171
FBgn0024319	1.30868	2.31373	0.748715	0.00257299	0.00569899	TRUE	Nach	protein_coding	3.01462	1.5733	2.44578	6.23798	1.53396	3.4809	2.20325	0.984289	0	0	0	0	0	2	3	8	2	4	3	1	0	0	0	0	0
FBgn0026395	21.7511	2.30976	0.30134	3.44498e-14	3.22874e-13	TRUE	Or23a	protein_coding	7.5804	29.057	51.5101	43.973	47.8037	41.5523	35.612	5.7333	5.03	11.7041	10.3553	5.57204	7.88624	38	65	58	59	49	48	6	5	12	12	3	7
FBgn0038919	601.342	2.30795	0.42518	5.97547e-08	2.92561e-07	TRUE	Qsox2	protein_coding	5.41953	407.097	2177.74	1248.94	1525.86	953.467	1600.66	100.658	544.848	85.7151	87.8418	428.99	160.953	532	2746	1647	1885	1129	2153	105	543	88	102	231	143
FBgn0001256	4053.59	2.30716	0.499395	5.55214e-06	2.02701e-05	TRUE	ImpL1	protein_coding	4.54276	9091.55	12666.2	9742.48	14541.6	7685.18	8437.05	3158.14	4552.65	549.578	1384.65	61.5171	962.96	11889	15978	12847	17909	9029	11383	3312	4513	563	1600	33	853
FBgn0036449	1988.62	2.30547	0.17898	5.84407e-38	3.8712e-36	TRUE	bmm	protein_coding	12.8799	2305.99	5353.55	5069.93	4850.98	3172.49	3548.32	741.056	854.082	722.842	724.946	1021.69	758.39	3014	6759	6712	6024	3772	4776	774	857	742	841	549	674
FBgn0038365	45.158	2.30197	0.235713	2.49099e-22	4.69743e-21	TRUE	CG9593	protein_coding	9.71946	84.8566	115.671	86.4239	123.192	59.4397	86.746	14.3183	22.1506	19.5153	16.4066	22.2891	15.7773	111	146	114	152	70	117	15	22	20	19	12	14
FBgn0032587	1488.01	2.30028	0.463209	6.91409e-07	2.89237e-06	TRUE	CG5953	protein_coding	4.96376	2192.03	4348.38	2643.89	3537.13	2065.71	2902.34	455.607	733.298	359.205	341.564	710.926	464.115	2922	5360	3308	4319	2382	3851	479	765	376	404	392	419
FBgn0263383	11.7323	2.29952	0.375345	2.16741e-09	1.26147e-08	TRUE	lncRNA:CR43435	ncRNA	5.98474	18.3076	15.8106	20.4557	18.6905	24.9201	23.5839	1.8915	5.07188	9.79517	1.73712	1.85809	1.13	24	20	27	23	29	32	2	5	10	2	1	1
FBgn0265086	3.17804	2.29824	0.641769	0.000883533	0.00217379	TRUE	lncRNA:CR44197	ncRNA	3.32521	5.33539	3.15958	3.02977	5.69388	3.45234	8.0894	0.942568	0	0	0	1.8583	1.13112	7	4	4	7	4	11	1	0	0	0	1	1
FBgn0265204	5.15241	2.29778	0.682586	0.00064373	0.00163076	TRUE	lncRNA:CR44264	ncRNA	3.41249	6.10552	3.1637	8.33504	4.87288	5.14224	0.737982	0.947686	0	0	0	1.85794	0	8	4	11	6	6	1	1	0	0	0	1	0
FBgn0263444	7.16181	2.29769	0.69089	0.00124423	0.00296013	TRUE	asRNA:CR43467	ncRNA	3.22854	5.61968	13.9649	19.9419	27.6184	13.5106	18.3518	0	11.8	0	0	0	1.65208	6	18	29	33	14	19	0	8	0	0	0	1
FBgn0053868	16.0418	2.29634	0.360305	3.43201e-10	2.18367e-09	TRUE	His2B:CG33868	protein_coding	6.27789	27.3526	33.8719	43.9125	22.0353	28.0327	18.9824	5.59138	2.05261	7.88415	10.5206	3.71736	1.13536	36	43	58	27	32	26	6	2	8	12	2	1
FBgn0264955	2.38545	2.29278	0.706048	0.0030197	0.00659406	TRUE	asRNA:CR44124	ncRNA	2.96573	2.95166	3.88823	5.40402	7.45212	13.0068	2.86083	0.892369	0	0	0	0	3.50727	4	5	7	9	14	4	1	0	0	0	0	3
FBgn0085261	177.804	2.29196	0.212971	5.86575e-27	1.61442e-25	TRUE	CG34232	protein_coding	10.7509	248.333	439.671	390.741	463.564	307.878	327.277	73.1507	42.6842	69.5631	45.1684	105.978	101.982	358	597	555	636	379	476	74	40	67	51	54	89
FBgn0011674	478.689	2.29154	0.150147	1.49953e-52	3.21124e-50	TRUE	insc	protein_coding	15.2561	973.631	1306	1034.63	1213.36	842.849	837.428	187.82	283.896	167.206	170.872	235.804	209.062	1271	1645	1364	1501	1004	1123	195	284	172	199	127	186
FBgn0284244	1384.72	2.29137	0.444823	3.0589e-07	1.35352e-06	TRUE	l(2)k05911	protein_coding	5.11978	1984.01	3641.84	3893.88	4715.21	2793.31	3689.33	705.732	2059.13	215.97	246.705	181.973	292.388	2591	4589	5134	5830	3320	4953	734	2057	222	287	98	260
FBgn0053290	6.38506	2.2877	0.504732	1.25089e-05	4.29691e-05	TRUE	CG33290	protein_coding	4.36852	5.32661	11.8305	17.4154	15.4829	25.2356	15.3809	3.74665	0	2.95037	3.4955	1.85862	3.40006	7	15	23	19	29	21	4	0	3	4	1	3
FBgn0045469	1.11652	2.28337	0.754909	0.00234238	0.0052477	TRUE	Gr93c	protein_coding	3.04299	3.82149	2.37625	0	2.43213	2.5507	2.22282	0	0	0	0	0	0	5	3	0	3	3	3	0	0	0	0	0	0
FBgn0266162	7.04065	2.28115	0.522376	2.31234e-05	7.61026e-05	TRUE	lncRNA:CR44868	ncRNA	4.23238	6.82698	18.8827	20.4458	24.5189	13.2227	11.6475	5.5651	2.05996	0	0	1.85853	6.82459	9	24	27	30	15	16	6	2	0	0	1	6
FBgn0267281	1.09482	2.27904	0.770373	0.00557099	0.0113253	TRUE	lncRNA:CR45717	ncRNA	2.77202	2.1883	3.87427	3.12232	5.81657	0.940517	1.42771	0	0	1.00911	0	0	0	3	5	4	7	1	2	0	0	1	0	0	0
FBgn0260440	81.6796	2.2788	0.437114	2.1674e-07	9.80128e-07	TRUE	spdo	protein_coding	5.18438	85.7296	278.447	241.92	258.936	120.57	183.785	23.9969	102.242	11.6822	30.9781	27.855	14.6266	112	351	319	320	143	247	25	102	12	36	15	13
FBgn0036040	310.598	2.27777	0.328047	4.26746e-12	3.27026e-11	TRUE	CG6749	protein_coding	6.92803	710.918	904.918	727.228	798.913	650.982	768.822	243.538	300.979	114.928	90.4154	38.9988	86.6624	929	1141	959	987	771	1034	254	300	118	105	21	77
FBgn0001222	4532.44	2.27701	0.221456	8.65075e-25	1.98005e-23	TRUE	Hsf	protein_coding	10.2802	4998.23	14937	11394.5	12368	7886.78	8832.68	1934.96	3312.97	1662.5	1561.86	1621.04	1992.94	6541	18945	15103	15376	9409	11901	2006	3315	1706	1818	869	1765
FBgn0053985	5.61561	2.27561	0.605239	0.00035343	0.00094674	TRUE	CG33985	protein_coding	3.57262	6.10383	30.0467	12.8804	17.061	4.29185	15.4857	1.89311	6.08211	0	0.868085	1.85803	3.38913	8	38	17	21	5	21	2	6	0	1	1	3
FBgn0026721	5471.1	2.26731	0.153125	1.33352e-49	2.17156e-47	TRUE	fat-spondin	protein_coding	14.8063	12258.9	13066	10120.5	11673.1	7772.84	9661.79	2073.92	2880.05	2066.71	1863.3	1663.79	2664.47	16011	16466	13344	14431	9233	12975	2158	2876	2124	2167	896	2369
FBgn0037548	146.209	2.26142	0.191269	3.48197e-32	1.49543e-30	TRUE	CG7900	protein_coding	11.8096	239.536	302.977	247.974	267.097	191.61	220.12	46.0333	26.0802	57.4585	60.2685	59.4263	51.769	313	382	327	330	227	296	48	26	59	70	32	46
FBgn0266263	5.61443	2.25531	0.524291	3.54666e-05	0.000113107	TRUE	asRNA:CR44958	ncRNA	4.13519	16.0559	12.6779	6.82317	20.2588	12.7283	10.3835	0	4.02563	2.92664	0.863212	0	5.63386	21	16	9	25	15	14	0	4	3	1	0	5
FBgn0034665	1.80437	2.25468	0.77634	0.00628904	0.0126144	TRUE	CG4372	protein_coding	2.73232	0	1.58417	5.30638	2.43213	13.6037	4.44563	0	1.00766	0	0	1.8575	0	0	2	7	3	16	6	0	1	0	0	1	0
FBgn0264883	2.49674	2.25298	0.722353	0.0011488	0.00275278	TRUE	lncRNA:CR44074	ncRNA	3.2513	3.80698	3.15643	1.51449	4.07188	1.73558	5.13394	0	0	0	0	0	1.13257	5	4	2	5	2	7	0	0	0	0	0	1
FBgn0031307	1487.8	2.24862	0.339112	3.50666e-11	2.4629e-10	TRUE	MFS3	protein_coding	6.62355	913.127	4243.11	3211.66	5710.73	2900.41	3611.94	546.046	1476.76	563.718	538.75	272.982	622.233	1193	5349	4235	7057	3439	4855	569	1473	579	626	147	553
FBgn0032493	2.13632	2.24008	0.750484	0.00220057	0.00496414	TRUE	Mabi	protein_coding	3.06174	0.762997	1.58144	7.57676	4.87442	2.57477	2.94985	0	0	0.979122	0	0	0	1	2	10	6	3	4	0	0	1	0	0	0
FBgn0051219	9.11014	2.2337	0.590144	0.000230288	0.00064276	TRUE	CG31219	protein_coding	3.68324	6.1132	19.0063	34.8686	14.5963	13.6183	41.4702	0.952791	0	7.81208	2.59351	1.85756	7.89287	8	24	46	18	16	56	1	0	8	3	1	7
FBgn0267239	2.12378	2.22852	0.704345	0.00405403	0.00855401	TRUE	lncRNA:CR45679	ncRNA	2.87393	0.763708	6.33168	8.33675	5.68042	4.26943	6.65411	0.950406	0	0	0	1.85773	2.25674	1	8	11	7	5	9	1	0	0	0	1	2
FBgn0266577	46.277	2.22848	0.334278	3.06775e-11	2.17202e-10	TRUE	asRNA:CR45108	ncRNA	6.64328	21.4971	94.6852	112.386	133.371	63.4046	88.8203	8.5945	15.9641	24.4076	18.9844	18.6249	15.6649	28	120	149	165	75	120	9	16	25	22	10	14
FBgn0020508	42.1453	2.22713	0.457743	1.30023e-06	5.19993e-06	TRUE	Ag5r2	protein_coding	4.83972	51.115	143.104	90.1589	40.6259	54.1042	173.987	9.46191	30.42	10.7725	12.1561	29.7288	11.2984	67	181	119	50	63	236	10	30	11	14	16	10
FBgn0050413	1.40164	2.22708	0.803001	0.0123419	0.0227444	TRUE	CG30413	protein_coding	2.50222	0	3.93049	9.84741	4.90898	1.77103	3.63253	0	0	0	0	0	1.13912	0	5	13	6	2	5	0	0	0	0	0	1
FBgn0039833	69.0118	2.21378	0.220107	1.12248e-23	2.36493e-22	TRUE	CG15564	protein_coding	10.0302	101.777	212.546	123.605	169.984	107.239	136.806	33.5564	29.096	24.3497	37.0287	25.9993	27.0121	133	268	163	210	127	184	35	29	25	43	14	24
FBgn0263776	2310.55	2.21273	0.45235	1.01547e-06	4.14922e-06	TRUE	CG43693	protein_coding	4.88862	3930.7	6454.57	4054.4	5775.94	3361.02	4045.3	564.716	266.721	336.754	271.41	3264.82	463.146	5547	8790	5703	7660	4271	5793	567	253	332	306	1669	401
FBgn0025827	29.9166	2.21138	0.682935	0.00142708	0.00334626	TRUE	CG6421	protein_coding	3.18912	14.4383	93.7494	64.356	75.0713	83.1687	82.5251	7.45898	40.0109	0	2.62933	5.57606	1.13514	19	119	85	92	95	113	8	39	0	3	3	1
FBgn0052027	21.4802	2.20735	0.350747	4.38107e-10	2.75389e-09	TRUE	lncRNA:CR32027	ncRNA	6.23981	25.9732	41.9591	44.7188	47.8616	42.6295	32.556	10.4668	4.03762	9.77046	0.865221	11.1459	12.4078	34	53	59	59	50	44	11	4	10	1	6	11
FBgn0013953	167.255	2.20712	0.305107	5.00132e-13	4.18105e-12	TRUE	Esp	protein_coding	7.22526	126.006	411.986	238.34	380.265	709.627	249.993	62.5362	66.2146	70.2693	66.9293	92.5388	75.5018	165	512	309	463	832	333	64	65	71	78	49	66
FBgn0267796	310.403	2.19845	0.192291	3.11462e-30	1.13234e-28	TRUE	Tmc	protein_coding	11.4256	498.454	951.585	744.19	938.226	445.648	554.465	118.818	173.003	146.927	153.796	119.898	166.533	650	1198	980	1160	531	743	123	173	151	179	65	148
FBgn0029970	104.947	2.19822	0.43925	6.46415e-07	2.71359e-06	TRUE	Nek2	protein_coding	4.97681	147.014	329.329	285.173	379.342	130.444	233.858	42.2968	161.193	17.5126	18.0539	22.2826	26.9913	192	415	376	469	155	314	44	161	18	21	12	24
FBgn0037129	659.736	2.19685	0.786761	0.00361247	0.00772977	TRUE	CG14565	protein_coding	2.91016	84.0142	1182.53	1440.77	1596.86	2137.23	1990.74	6.65502	258.585	14.6609	18.1794	313.953	5.64132	110	1494	1901	1968	2504	2692	7	256	15	21	169	5
FBgn0043043	5.71499	2.19531	0.613485	0.000591384	0.00151039	TRUE	Desat2	protein_coding	3.43554	9.17576	22.9811	12.8886	15.3947	5.08844	16.3215	3.82196	1.00605	4.87683	0	0	3.37988	12	29	17	19	6	22	4	1	5	0	0	3
FBgn0039028	520.099	2.19063	0.598691	0.000327171	0.000883361	TRUE	CG13840	protein_coding	3.59278	1309.12	808.81	1351.26	2284.73	470.754	1531.68	19.1615	160.621	7.79419	704.718	65.0002	341.099	1711	1020	1782	2822	557	2061	20	160	8	818	35	303
FBgn0261989	442.703	2.19063	0.596773	0.000241073	0.000670348	TRUE	CG42807	protein_coding	3.67156	248.535	1045.85	1467.66	839.535	1046.96	562.845	110.234	153.547	39.6929	45.0662	448.757	51.581	320	1325	1931	1037	1205	764	121	149	40	51	239	44
FBgn0025686	127.099	2.19003	0.188553	4.1216e-31	1.59971e-29	TRUE	Amnionless	protein_coding	11.6	175.177	243.867	258.741	202.84	203.045	180.725	31.7784	59.6352	44.036	39.6612	32.2411	62.1871	225	302	335	250	244	240	35	59	46	47	17	55
FBgn0030204	5.73638	2.18953	0.567915	0.000196075	0.000554996	TRUE	Or9a	protein_coding	3.72402	6.11407	19.8011	22.7413	12.9722	4.25236	11.1125	1.90676	2.01567	0	3.45667	7.43005	0	8	25	30	16	5	15	2	2	0	4	4	0
FBgn0040958	5.5061	2.18563	0.784681	0.00821937	0.0159679	TRUE	Peritrophin-15b	protein_coding	2.64292	0	42.3209	7.32552	6.787	14.3334	13.2923	1.02484	2.62303	0.587236	0	4.25007	0	0	47	8	7	13	16	1	2	1	0	2	0
FBgn0029091	430.107	2.18292	0.36962	3.56244e-09	2.02148e-08	TRUE	Chs2	protein_coding	5.90333	239.041	1369.37	822.191	886.657	797.039	882.381	130.071	266.806	88.4487	68.6736	349.072	107.892	312	1725	1084	1097	950	1183	135	267	91	80	188	96
FBgn0263106	9793.85	2.18285	0.167141	5.6127e-39	3.98834e-37	TRUE	DnaJ-1	protein_coding	13.0595	12416.3	24559.2	22316.3	22813.9	16577.1	19389.4	3869.21	6358	4007.64	3969.07	3558.56	3810.3	16228	30845	29325	28077	19619	26041	4046	6299	4130	4648	1914	3390
FBgn0029716	1.15532	2.18204	0.800599	0.00894497	0.0171811	TRUE	CG3546	protein_coding	2.61415	3.06216	3.96698	4.55038	4.85428	0	0.744333	0	0	0	0	0	0	4	5	6	6	0	1	0	0	0	0	0	0
FBgn0039811	4.06318	2.17969	0.594188	0.000476986	0.00124465	TRUE	CG15550	protein_coding	3.49336	12.1114	6.28601	15.9106	7.3674	0.887577	8.70929	1.84551	1.03381	1.97925	0	0	3.42019	16	8	21	9	1	12	2	1	2	0	0	3
FBgn0038886	19.8576	2.17854	0.420498	2.79967e-07	1.24516e-06	TRUE	Ugt49B2	protein_coding	5.13646	25.2484	34.0962	24.2649	32.3854	37.1908	43.102	0	18.071	5.84584	6.03089	0	6.75459	33	43	32	40	44	58	0	18	6	7	0	6
FBgn0085265	44.149	2.17103	0.241291	3.26611e-19	4.79879e-18	TRUE	CG34236	protein_coding	8.95935	54.6629	81.0483	64.0538	69.032	56.5529	67.3063	12.3313	19.4268	11.1656	20.4383	8.30678	10.8576	70	97	84	87	60	94	16	17	13	23	4	13
FBgn0052270	1.24749	2.1614	0.769399	0.0106765	0.0199984	TRUE	CG32270	protein_coding	2.55311	2.29623	6.34608	3.03345	4.85533	1.68671	2.23193	0	2.00506	0	0	0	0	3	8	4	6	2	3	0	2	0	0	0	0
FBgn0266818	5.76419	2.16066	0.495265	2.54273e-05	8.31253e-05	TRUE	lncRNA:CR45280	ncRNA	4.21097	5.35814	15.0727	13.6507	16.9925	9.27426	16.3699	0.959906	2.0047	0	5.16291	1.857	4.50044	7	19	18	21	11	22	1	2	0	6	1	4
FBgn0041246	41.5557	2.15538	0.226956	3.59243e-21	6.23312e-20	TRUE	Gr32a	protein_coding	9.44387	49.7273	65.0149	59.9025	78.5433	60.0421	60.1791	14.3644	9.0383	15.5914	19.8206	11.1431	9.00714	65	82	79	97	71	81	15	9	16	23	6	8
FBgn0033733	37.1312	2.1477	0.668193	0.00102039	0.00247313	TRUE	CG8834	protein_coding	3.28484	7.65249	38.8614	75.0735	57.4701	58.2598	49.817	5.75282	2.00654	2.9219	13.7777	14.8567	1.12549	10	49	99	71	69	67	6	2	3	16	8	1
FBgn0033931	8.44228	2.14166	0.464242	6.73269e-06	2.41737e-05	TRUE	Obp50e	protein_coding	4.50197	8.38398	26.8558	11.3615	23.5896	27.6223	19.1192	5.65484	3.05171	1.96185	2.6114	1.85831	7.91808	11	34	15	29	32	26	6	3	2	3	1	7
FBgn0286788	134.511	2.14037	0.270346	2.61818e-15	2.7106e-14	TRUE	Orc1	protein_coding	7.90788	157.006	352.429	321.599	342.029	200.863	234.764	63.5135	89.0303	43.7618	45.534	66.8447	41.5984	205	444	424	423	239	315	66	89	45	53	36	37
FBgn0053329	162.342	2.14027	0.175684	4.58435e-34	2.26079e-32	TRUE	Sp212	protein_coding	12.1683	362.658	470.21	291.937	349.763	354.163	351.501	71.8491	94.3716	79.8935	68.925	102.143	73.175	474	593	385	432	419	473	75	94	82	80	55	65
FBgn0031735	358.007	2.13997	0.470503	6.07946e-06	2.19746e-05	TRUE	CG11029	protein_coding	4.52361	84.94	838.269	922.107	1066.88	1395.11	782.13	106.412	526.776	98.3764	70.6167	81.7124	113.679	111	1057	1216	1318	1652	1052	111	525	101	82	44	101
FBgn0004426	19.2301	2.13496	0.616627	0.000654083	0.00165484	TRUE	LysC	pseudogene	3.40814	3.80731	52.2326	68.9503	45.6548	45.7269	47.6368	12.384	8.29154	4.18482	0	20.3062	0	6	70	77	52	45	66	15	8	4	0	12	0
FBgn0061209	1.45683	2.13451	0.754002	0.0031903	0.0069135	TRUE	His2B:CG17949	protein_coding	2.94878	0.759794	2.36315	3.02845	2.44837	1.75204	2.19028	0	0	0	0	0	0	1	3	4	3	2	3	0	0	0	0	0	0
FBgn0039666	3.57074	2.13368	0.763846	0.00918797	0.017583	TRUE	Diedel	protein_coding	2.60498	2.24398	3.90689	0.763051	3.29571	6.3801	36.6502	3.6194	2.09293	0	0	0	0	3	5	1	4	7	51	4	2	0	0	0	0
FBgn0036738	7.87703	2.13263	0.562268	0.000213405	0.000599488	TRUE	CG7542	protein_coding	3.7026	10.9646	7.73469	9.46628	9.63391	10.1859	10.6742	2.2415	4.80929	0	0	2.20218	1.33929	14	12	14	12	10	14	2	4	0	0	1	1
FBgn0050375	119.277	2.12585	0.504488	2.89252e-05	9.36399e-05	TRUE	CG30375	protein_coding	4.18177	45.8832	202.095	287.347	340.262	570.446	244.889	33.4562	185.051	31.2063	37.098	9.2866	29.2887	60	255	379	420	673	330	35	184	32	43	5	26
FBgn0267205	4.04724	2.12529	0.678997	0.00159411	0.00369743	TRUE	lncRNA:CR45645	ncRNA	3.15698	3.04656	0	3.78654	5.6986	7.79718	2.20208	0.939835	0	0	0	0	1.13213	4	0	5	7	9	3	1	0	0	0	0	1
FBgn0036584	412.918	2.12262	0.465513	5.07652e-06	1.86469e-05	TRUE	CG13054	protein_coding	4.5616	118.515	1122.07	992.41	910.764	531.016	734.384	137.566	112.694	68.2808	22.4398	449.482	85.628	155	1416	1309	1124	626	990	144	112	70	26	242	76
FBgn0051463	3.16666	2.12226	0.708737	0.00221778	0.00499864	TRUE	CG31463	protein_coding	3.0594	1.52897	5.54597	6.82296	3.24185	1.69815	5.19014	0	0	0	0	1.85742	1.12693	2	7	9	4	2	7	0	0	0	0	1	1
FBgn0065108	6.16036	2.12043	0.547294	0.00016672	0.000478227	TRUE	ppk16	protein_coding	3.76474	6.12718	23.8133	7.58493	14.554	8.40338	14.9065	2.88723	2.00054	0	3.43634	3.71358	2.2485	8	30	10	18	10	20	3	2	0	4	2	2
FBgn0065109	6.16036	2.12043	0.547294	0.00016672	0.000478227	TRUE	ppk11	protein_coding	3.76474	6.12718	23.8133	7.58493	14.554	8.40338	14.9065	2.88723	2.00054	0	3.43634	3.71358	2.2485	8	30	10	18	10	20	3	2	0	4	2	2
FBgn0032283	92.7201	2.11979	0.434764	1.22708e-06	4.92882e-06	TRUE	CG7296	protein_coding	4.85121	197.558	296.113	142.22	180.764	119.066	363.727	34.4473	119.51	20.729	14.3943	24.8003	50.9914	263	375	190	221	136	499	36	121	23	16	13	49
FBgn0031254	7.75417	2.11268	0.505945	4.47657e-05	0.000140583	TRUE	CG13692	protein_coding	4.0814	12.178	16.5658	17.4158	9.77622	11.3006	19.786	4.68706	1.0216	0	5.24056	1.85856	3.3991	16	21	23	12	13	27	5	1	0	6	1	3
FBgn0264496	8.4738	2.11175	0.509503	5.24149e-05	0.000162644	TRUE	asRNA:CR43898	ncRNA	4.04459	7.64485	7.13053	10.6135	9.72554	21.2268	11.1217	1.90922	0	4.8787	3.45388	0	1.12693	10	9	14	12	25	15	2	0	5	4	0	1
FBgn0028999	86.1557	2.1117	0.609503	0.000765371	0.00191074	TRUE	nerfin-1	protein_coding	3.36502	84.2487	431.02	219.204	255.505	126.892	185.585	12.5113	180.049	16.5317	9.44996	1.85679	12.3668	110	543	289	316	151	249	13	180	17	11	1	11
FBgn0003231	11500.6	2.10989	0.185124	4.35455e-30	1.55381e-28	TRUE	ref(2)P	protein_coding	11.3965	11753.7	32004.9	27791.4	30348.3	19558.2	22879.9	5007.87	7131.23	4825.66	4801.19	5726.75	5292.15	15352	40335	36644	37516	23226	30730	5212	7120	4959	5583	3084	4705
FBgn0085319	1.80462	2.10955	0.683421	0.00523683	0.010717	TRUE	CG34290	protein_coding	2.79209	5.34358	4.74668	6.82003	4.87153	2.56779	2.21539	0	2.02375	0.978263	0	1.85786	0	7	6	9	6	3	3	0	2	1	0	1	0
FBgn0243514	412.861	2.10911	0.206856	2.09662e-24	4.62292e-23	TRUE	eater	protein_coding	10.1946	513.166	934.301	485.439	737.378	578.061	562.021	118.391	123.021	124.467	90.1968	233.954	179.874	670	1177	640	912	688	754	123	123	128	105	126	160
FBgn0266414	3.2663	2.10704	0.715267	0.00408982	0.00861672	TRUE	lncRNA:CR45054	ncRNA	2.87115	3.06135	7.93182	3.03337	10.5212	6.75046	6.69398	1.91857	0	0	0	3.7141	0	4	10	4	13	8	9	2	0	0	0	2	0
FBgn0261560	2865.34	2.10637	0.192683	8.22544e-28	2.41254e-26	TRUE	Thor	protein_coding	10.9307	3180.58	7245.53	6064.79	6810.08	5782.56	6637.29	1358.1	1844.25	1218.31	999.298	1259.93	1439.96	4173	9173	8007	8372	6699	9026	1441	1813	1242	1148	678	1273
FBgn0265738	4.5547	2.10614	0.712602	0.000834554	0.00206499	TRUE	lncRNA:CR44545	ncRNA	3.34107	2.27467	0.786564	3.02922	0.817568	1.76568	4.36486	0	0	0	0	0	0	3	1	4	1	2	6	0	0	0	0	0	0
FBgn0040565	17.2702	2.10459	0.798931	0.00401829	0.00848662	TRUE	CG7606	protein_coding	2.87672	11.2723	98.8092	18.2284	70.641	17.1325	72.5027	0	8.29446	0	0	0	4.69821	4	45	14	37	24	32	0	2	0	0	0	1
FBgn0033204	152.739	2.09966	0.401481	1.66656e-07	7.64029e-07	TRUE	CG2065	protein_coding	5.23314	67.321	316.28	265.36	255.436	267.726	258.958	61.2216	41.5566	29.3714	13.8651	140.143	19.2205	88	399	351	315	314	349	64	42	30	16	76	17
FBgn0262570	271.435	2.09868	0.154275	4.14261e-42	3.50062e-40	TRUE	CG43110	protein_coding	13.5975	359.763	484.88	332.913	544.602	421.226	310.432	84.1507	111.248	82.687	103.602	103.738	80.2351	501	651	464	718	490	497	87	114	77	122	63	87
FBgn0037406	894.694	2.09537	0.505277	4.39883e-05	0.000138336	TRUE	Osi1	protein_coding	4.08547	2767.21	1640.22	2106.57	3051.95	1537.34	2248.04	211.593	1267.12	271.431	313.746	39.0082	568.229	3621	2071	2779	3764	1807	3035	222	1257	278	363	21	504
FBgn0038416	29.9802	2.09272	0.545548	0.000126906	0.000370136	TRUE	CG17930	protein_coding	3.83239	9.94592	54.7102	80.3766	55.0581	54.1088	81.7351	4.78908	8.03277	4.87192	1.72332	39.0005	7.88079	13	69	106	68	64	110	5	8	5	2	21	7
FBgn0265872	2.96135	2.09025	0.655346	0.00270259	0.00595653	TRUE	lncRNA:CR44661	ncRNA	2.99968	2.26256	6.27345	3.79435	7.38523	11.6543	7.95087	2.74772	0	0	0	0	3.43365	3	8	5	9	13	11	3	0	0	0	0	3
FBgn0024249	1.56217	2.08669	0.784857	0.0130629	0.0239147	TRUE	cato	protein_coding	2.48205	0	7.89426	6.81591	4.88387	2.59743	1.46849	0	2.03826	0	0	0	0	0	10	9	6	3	2	0	2	0	0	0	0
FBgn0267602	11.5495	2.07873	0.428288	1.75887e-06	6.8948e-06	TRUE	lncRNA:CR45940	ncRNA	4.77932	18.2282	16.5375	31.0426	8.16394	30.7063	18.9691	3.7234	0	7.88798	7.01879	0	5.67914	24	21	41	10	35	26	4	0	8	8	0	5
FBgn0052301	99.7137	2.07631	0.18243	6.51505e-30	2.26333e-28	TRUE	CG32301	protein_coding	11.3613	152.533	146.149	150.346	126.444	120.769	111.602	36.3809	22.2851	36.0558	40.9553	28.2134	21.1727	199	183	199	156	144	151	38	22	37	48	15	19
FBgn0062412	395.274	2.07045	0.243107	1.68396e-17	2.1316e-16	TRUE	Ctr1B	protein_coding	8.51375	232.858	737.415	1006.39	915.701	824.521	647.865	167.055	203.295	187.783	117.853	154.199	173.835	305	932	1328	1128	964	877	176	201	192	136	83	154
FBgn0036229	3.22199	2.06949	0.720054	0.00603669	0.012166	TRUE	CG7248	protein_coding	2.74578	6.89138	4.76146	3.79221	8.08815	10.098	5.21363	0	0	3.89157	0.859673	0	0	9	6	5	10	12	7	0	0	4	1	0	0
FBgn0035886	3.23099	2.06721	0.759174	0.00965592	0.0183371	TRUE	Jon66Ci	protein_coding	2.58791	3.05137	1.58109	0.75762	6.5009	2.57769	28.7447	0	0	0	3.47407	0	1.12997	4	2	1	8	3	39	0	0	0	4	0	1
FBgn0265687	11.1213	2.06408	0.494958	3.96256e-05	0.000125297	TRUE	lncRNA:CR44494	ncRNA	4.10965	15.2758	10.2901	18.1898	15.4163	17.9211	15.5308	0	0	2.93202	11.253	1.8577	1.12822	20	13	24	19	21	21	0	0	3	13	1	1
FBgn0039827	782.307	2.06323	0.295057	2.67614e-12	2.096e-11	TRUE	CG1544	protein_coding	6.99376	1570.7	1367.54	968.569	1360.98	871.925	1116.18	232.799	254.159	152.703	132.336	668.458	217.009	2051	1723	1277	1683	1037	1498	242	254	157	154	360	193
FBgn0283461	7603.67	2.06267	0.29718	4.00596e-12	3.08043e-11	TRUE	Drs	protein_coding	6.93697	5100.45	18146.4	22670.2	16787.4	24255.1	14132.4	3822.96	4521.91	3125.01	2404.63	5595.18	3518.18	6871	23289	29522	20315	26304	19728	4261	4304	3119	2671	3031	3026
FBgn0264904	140.294	2.06217	0.280508	2.08706e-13	1.83195e-12	TRUE	asRNA:CR44095	ncRNA	7.3431	456.659	357.897	207.55	221.188	153.449	289.179	60.3786	106.724	64.7147	30.4467	52.0312	71.2425	599	453	274	272	178	393	64	105	66	35	28	63
FBgn0266430	11.8763	2.06172	0.510913	6.43513e-05	0.000197062	TRUE	CG45060	protein_coding	3.99626	3.78133	19.6336	27.2849	28.6696	28.479	10.1493	5.52549	1.03526	0	6.18467	9.2885	2.28237	5	25	36	35	32	14	6	1	0	7	5	2
FBgn0033968	610.971	2.05689	0.228697	2.4807e-19	3.68288e-18	TRUE	hui	protein_coding	8.98963	796.125	1710.59	1539.66	1562.86	1179.95	1404.71	389.408	471.321	299.271	311.947	127.998	306.207	1045	2176	2049	1938	1379	1923	412	466	304	356	69	271
FBgn0042086	470.354	2.0566	0.318724	1.11484e-10	7.46397e-10	TRUE	Tsp42Eb	protein_coding	6.4505	676.789	684.776	867.543	1004.11	946.573	1018.48	281.175	265.549	201.693	44.2676	156.073	227.061	887	866	1145	1236	1103	1381	297	262	206	51	84	201
FBgn0265376	88.8796	2.05575	0.21158	3.07238e-22	5.76596e-21	TRUE	lncRNA:CR44317	ncRNA	9.69808	199.053	240.789	143.475	217.087	141.51	209.091	49.7328	44.8689	33.0285	37.2586	49.9798	57.5031	253	311	198	257	165	281	50	49	35	45	29	51
FBgn0038221	135.655	2.05285	0.185487	2.11787e-28	6.60851e-27	TRUE	IFT54	protein_coding	11.0531	206.62	356.102	354.136	335.911	284.524	223.069	68.0788	80.2581	74.9938	65.4417	37.1417	85.5358	270	449	467	415	337	300	71	80	77	76	20	76
FBgn0264549	1.28785	2.05248	0.772525	0.0138831	0.025219	TRUE	lncRNA:CR43928	ncRNA	2.46027	2.18196	5.65311	3.2341	2.81517	0	5.02737	0.662809	0	0	0	0	1.62015	2	5	5	5	0	6	1	0	0	0	0	1
FBgn0027657	1832.31	2.05115	0.239212	1.00534e-17	1.30971e-16	TRUE	glob1	protein_coding	8.57333	6360.64	3885.94	2092.64	4689.42	2578.05	2198.9	740.845	878.988	712.071	711.495	1168.43	884.917	7827	4715	2673	5477	2924	2858	810	886	756	848	628	816
FBgn0039428	3.67251	2.05007	0.745095	0.0086902	0.0167638	TRUE	CG14237	protein_coding	2.62401	3.68156	8.54756	0.773527	12.429	20.49	3.57425	0	1.05355	0	2.71703	0	2.34281	5	11	1	15	22	5	0	1	0	3	0	2
FBgn0000395	2168.53	2.04867	0.160421	2.43196e-37	1.49094e-35	TRUE	cv-2	protein_coding	12.7693	2898.16	6094.67	4690.85	5698.38	3740.66	4100.89	1171.67	1361.09	990.44	942.58	868.933	1148.59	3783	7676	6184	7050	4458	5498	1216	1362	1019	1098	468	1022
FBgn0014179	51.2293	2.04838	0.320555	1.96705e-10	1.28611e-09	TRUE	gcm	protein_coding	6.36389	49.8907	189.211	108.913	142.798	82.8047	126.534	18.9562	37.4996	24.6185	27.7634	9.03188	40.1372	67	217	142	162	101	160	20	37	26	33	5	34
FBgn0266676	18.7757	2.04769	0.365754	2.86234e-08	1.45424e-07	TRUE	lncRNA:CR45166	ncRNA	5.54965	19.8589	38.7865	37.8957	30.8318	19.6258	48.0742	5.70551	9.08933	3.90922	13.8491	3.71539	5.64098	26	49	50	38	23	65	6	9	4	16	2	5
FBgn0029848	12.1871	2.03915	0.470026	1.77664e-05	5.93466e-05	TRUE	Btnd	protein_coding	4.29126	19.1328	34.1057	12.8917	25.0899	13.5033	15.6179	9.59153	2.00596	2.92146	0	5.57118	5.62684	25	43	17	31	16	21	10	2	3	0	3	5
FBgn0037126	1593.89	2.03897	0.197556	5.8407e-25	1.35271e-23	TRUE	CG14567	protein_coding	10.318	3353.78	5267.25	3825.38	3250.28	2862.22	3587.76	765.952	1225.27	937.407	830.378	423.718	1085.31	4402	6671	5051	3994	3309	4884	814	1203	955	953	228	959
FBgn0266025	2.43636	2.03889	0.665772	0.00249684	0.00554763	TRUE	lncRNA:CR44790	ncRNA	3.02372	3.05149	1.58115	2.27288	1.62514	5.15423	4.42278	0	0	0	0.868415	0	1.12991	4	2	3	2	6	6	0	0	0	1	0	1
FBgn0261681	7.69345	2.03847	0.588465	0.000659355	0.0016671	TRUE	CG42728	protein_coding	3.40594	1.51864	10.2357	24.2284	8.16575	14.9288	14.5848	4.65089	0	1.97258	4.38882	1.85862	0	2	13	32	10	17	20	5	0	2	5	1	0
FBgn0000591	7.75771	2.03764	0.63438	0.00215633	0.00487277	TRUE	E(spl)m8-HLH	protein_coding	3.06781	3.81156	26.86	17.4217	17.8919	19.8362	30.8982	2.82933	14.2333	0	1.74017	1.85828	1.13094	5	34	23	22	23	42	3	14	0	2	1	1
FBgn0034664	48.0824	2.03616	0.680556	0.00183	0.00418741	TRUE	CG4377	protein_coding	3.11652	3.81231	82.968	18.1805	34.1492	51.6886	71.3995	12.271	2.03193	4.90149	2.60885	16.7239	0	5	105	24	42	60	97	13	2	5	3	9	0
FBgn0029147	411.256	2.03547	0.141349	5.46397e-47	7.17801e-45	TRUE	NtR	protein_coding	14.3962	747.029	776.649	634.11	713.073	459.247	669.213	157.263	166.498	163.596	145.493	154.122	177.799	976	979	836	881	544	900	164	166	168	169	83	158
FBgn0261566	40.955	2.03469	0.303402	2.56087e-11	1.82887e-10	TRUE	CG42680	protein_coding	6.66984	99.1434	103.519	52.0641	110.346	69.6981	133.947	23.2972	28.1316	21.922	16.9951	13.6801	27.8686	154	138	59	127	69	186	28	27	21	17	8	21
FBgn0031261	292.823	2.03454	0.183112	1.15797e-28	3.68688e-27	TRUE	nAChRbeta3	protein_coding	11.1071	292.965	573.946	501.189	531.281	408.799	402.509	105.269	121.579	107.22	88.7986	115.148	112.611	383	724	661	656	483	542	110	121	110	103	62	100
FBgn0003448	5.19446	2.03394	0.557314	0.000458691	0.00120112	TRUE	sna	protein_coding	3.50379	5.35561	20.6159	6.82447	15.3835	10.1442	17.0911	1.91582	5.02009	5.84607	0.861607	0	1.1258	7	26	9	19	12	23	2	5	6	1	0	1
FBgn0035076	604.259	2.0308	0.173889	1.68942e-31	6.77198e-30	TRUE	Ance-5	protein_coding	11.6761	1841.7	1085.25	1098.89	1065.65	752.827	991.169	239.035	306.7	313.458	243.506	222.839	317.274	2406	1368	1449	1317	893	1332	249	306	322	283	120	282
FBgn0038613	141.252	2.0288	0.397668	3.63031e-07	1.59156e-06	TRUE	Vha100-4	protein_coding	5.08739	232.789	458.714	379.227	383.35	194.324	243.591	79.813	86.0808	59.3401	48.9935	89.1292	59.6	304	578	500	474	231	327	83	86	61	57	48	53
FBgn0033855	8.30605	2.02862	0.457158	1.36168e-05	4.64277e-05	TRUE	link	protein_coding	4.34995	20.6472	21.3981	14.4052	12.9626	8.4767	13.3572	0.955846	3.01725	3.90086	0	1.85732	10.1385	27	27	19	16	10	18	1	3	4	0	1	9
FBgn0034899	1.76103	2.02838	0.744096	0.0128492	0.0235764	TRUE	CG13560	protein_coding	2.48792	2.83326	2.10151	2.86737	11.0086	3.23809	2.81099	0	2.53649	0	1.08422	0	0	3	3	5	15	3	4	0	2	0	1	0	0
FBgn0286785	3024.96	2.02003	0.164648	1.3469e-34	6.92636e-33	TRUE	scb	protein_coding	12.2679	6177.81	8239.79	5750.23	6502.42	4610.64	5233.6	1475.37	2218.84	1252.11	1204.66	1314.9	1402.29	8033	10334	7550	8008	5468	6995	1550	2242	1293	1421	706	1263
FBgn0031937	120.763	2.01949	0.382642	1.29017e-07	6.01709e-07	TRUE	CG13795	protein_coding	5.28024	190.062	214.339	193.805	166.871	162.589	207.731	21.2969	55.4649	18.9788	16.85	125.812	23.5202	249	267	253	203	203	279	23	56	20	19	69	23
FBgn0260986	134.322	2.01895	0.316186	1.78212e-10	1.17009e-09	TRUE	mei-38	protein_coding	6.37903	117.023	348.205	322.734	301.831	212.939	208.837	55.3036	122.772	56.3117	27.2949	61.9982	28.8443	153	439	426	370	248	282	58	118	58	31	34	26
FBgn0034639	436.032	2.01835	0.209575	6.10283e-22	1.11978e-20	TRUE	CG15673	protein_coding	9.62779	665.585	879.845	691.31	1102	771.925	852.397	174.372	311.559	188.462	116.703	239.624	168.002	871	1111	912	1359	907	1151	183	309	193	135	129	149
FBgn0260011	1688.44	2.01677	0.163311	5.0042e-35	2.66091e-33	TRUE	NimC4	protein_coding	12.3478	2765.96	3821.25	3380.42	4202.14	2931.53	3872.05	730.337	1092.3	937.653	704.555	607.374	1031.11	3618	4823	4459	5185	3453	5222	765	1085	961	816	327	915
FBgn0022355	30002.5	2.01561	0.28309	1.12565e-12	9.1083e-12	TRUE	Tsf1	protein_coding	7.1142	116553	76605.4	52226.5	65028.6	47391.1	65012.8	18477.6	30902.3	15187.1	13613.9	5432.8	16362.9	152204	96542	68823	80339	56172	87353	19255	30831	15590	15810	2924	14531
FBgn0263037	5.52559	2.01506	0.501458	0.000109241	0.000321735	TRUE	CG43332	protein_coding	3.86909	11.481	12.692	10.617	26.7047	6.74725	11.9033	4.79822	1.00257	3.89445	2.5819	0	4.5008	15	16	14	33	8	16	5	1	4	3	0	4
FBgn0262532	24.7571	2.01499	0.296746	1.53622e-11	1.11857e-10	TRUE	CR43086	pseudogene	6.74444	18.9759	52.7494	41.3813	60.117	33.9993	48.4249	12.3867	10.1261	6.85836	13.0172	7.44847	9.02428	25	67	55	74	40	65	13	10	7	15	4	8
FBgn0034335	2886.6	2.01416	0.144797	5.56524e-44	5.613e-42	TRUE	GstE1	protein_coding	13.9093	3910.79	7542.91	6691.19	7458.73	5042.82	5773.67	1245.32	1533.97	1462.53	1327.32	1841.38	1510.89	5127	9542	8832	9178	5867	7835	1317	1512	1493	1528	991	1337
FBgn0259230	1.19553	2.01371	0.80329	0.0220027	0.0378986	TRUE	lectin-22C	protein_coding	2.29032	0.76296	3.16273	10.6073	3.24981	0	1.47473	0	0	0	0.868141	0	0	1	4	14	4	0	2	0	0	0	1	0	0
FBgn0042187	1.38302	2.01324	0.80394	0.0154696	0.0277718	TRUE	CG17234	protein_coding	2.42119	1.52525	0.790328	10.6059	4.87725	0	1.47296	0	0	0	0	0	0	2	1	14	6	0	2	0	0	0	0	0	0
FBgn0034356	2310.16	2.01275	0.160811	6.18299e-36	3.48948e-34	TRUE	Pepck2	protein_coding	12.515	6420.06	4823.43	4570.34	4969.41	3822.53	5009.64	1217.06	1859.92	1007.08	912.427	1067.17	1171.26	8580	6184	6178	6191	4512	6594	1230	1857	1038	1069	580	1051
FBgn0044811	2.38913	2.01268	0.803121	0.0148339	0.0267565	TRUE	TotF	protein_coding	2.43641	0	5.4985	4.54673	0	8.00133	16.6813	0.921639	0	0	0	0	1.14074	0	7	6	0	9	23	1	0	0	0	0	1
FBgn0039522	2.62273	2.01254	0.660947	0.00417834	0.008767	TRUE	CG13972	protein_coding	2.86437	1.52926	9.50919	4.54888	4.05136	6.7855	5.19286	0.955389	4.02454	0	0	0	0	2	12	6	5	8	7	1	4	0	0	0	0
FBgn0038142	3.27787	2.0106	0.706778	0.00519142	0.0106366	TRUE	CheA87a	protein_coding	2.79491	3.80386	5.51964	3.02863	10.5961	4.35572	7.32037	0	0	0	0.874355	3.71722	1.13366	5	7	4	13	5	10	0	0	0	1	2	1
FBgn0286885	2.40491	2.00805	0.617541	0.00252728	0.00560729	TRUE	CR46407	pseudogene	3.02006	6.08508	7.884	7.57149	4.07625	3.48751	3.65873	0	0	1.96813	1.74943	0	2.2678	8	10	10	5	4	5	0	0	2	2	0	2
FBgn0265996	3.0979	2.00689	0.667393	0.00438031	0.00914616	TRUE	lncRNA:CR44771	ncRNA	2.84939	5.32231	4.7289	7.5712	9.78676	4.36724	8.77335	0.934007	0	1.96925	0	5.57596	0	7	6	10	12	5	12	1	0	2	0	3	0
FBgn0086266	0.79127	2.00548	0.791937	0.0144255	0.0260921	TRUE	Vm26Ac	protein_coding	2.44649	0.760472	4.72964	2.27142	2.4462	0.87264	0.731422	0	0	0	0	0	0	1	6	3	3	1	1	0	0	0	0	0	0
FBgn0034761	862.745	2.00405	0.129561	5.92963e-54	1.40451e-51	TRUE	CG4250	protein_coding	15.4655	1509.3	1919.97	1783.95	2007.94	1435.79	1701.97	412.815	482.076	410.849	308.498	515.034	438.487	1986	2437	2357	2462	1643	2329	442	470	417	352	277	387
FBgn0267206	1.23564	2.00313	0.785019	0.00929632	0.0177556	TRUE	lncRNA:CR45646	ncRNA	2.60096	0	1.57293	3.78675	0.817722	4.41724	2.1818	0	0	0	0	0	0	0	2	5	1	5	3	0	0	0	0	0	0
FBgn0267038	9.78231	1.99853	0.580665	0.000689637	0.00173609	TRUE	lncRNA:CR45482	ncRNA	3.39367	14.5354	15.8569	22.7477	8.09747	29.6018	14.1152	0.957535	0	0	14.6509	0	3.37777	19	20	30	10	35	19	1	0	0	17	0	3
FBgn0004191	1.23671	1.9965	0.786236	0.0099134	0.0187486	TRUE	snRNA:U2:34ABa	snRNA	2.57884	0.641616	5.79513	0.933916	0.953261	1.0369	3.63751	0	0	0	0	0	0	1	8	1	1	1	5	0	0	0	0	0	0
FBgn0063491	1736.54	1.99648	0.434657			FALSE	GstE9	protein_coding	4.59287	3370.84	3585.8	2908.88	3305.97	2238.12	3450.73	573.903	510.013	279.385	164.358	2443.54	232.913	4421	4538	3840	4066	2598	4688	608	502	285	189	1315	206
FBgn0259186	4.55634	1.99607	0.729561	0.0098862	0.018704	TRUE	Ir60c	pseudogene	2.57978	2.29378	7.13157	20.4697	15.396	9.33237	12.6097	0	7.04404	0.975488	0	0	2.25345	3	9	27	19	11	17	0	7	1	0	0	2
FBgn0052633	128.79	1.99381	0.676652	0.00346288	0.00744639	TRUE	CG32633	protein_coding	2.92335	24.3893	228.693	469.773	411.408	340.71	193.37	44.074	28.2207	17.3009	7.71454	180.238	6.33508	32	281	584	478	394	255	53	32	17	9	97	6
FBgn0265266	182.856	1.99166	0.66514	0.00240215	0.00537082	TRUE	CG13639	protein_coding	3.0354	70.869	180.332	280.081	270.023	462.966	401.036	28.3767	117.449	27.8037	34.5984	37.1281	32.058	94	230	369	329	516	555	31	113	28	39	20	28
FBgn0267934	5.1696	1.98777	0.568325	0.000782704	0.00194965	TRUE	lncRNA:CR46214	ncRNA	3.35884	24.508	11.1125	5.30941	14.5546	6.72384	11.9242	1.92457	8.003	0.972503	2.57747	1.8568	0	32	14	7	18	8	16	2	8	1	3	1	0
FBgn0040950	3.32479	1.98767	0.757041	0.0164004	0.0292313	TRUE	Muc26B	protein_coding	2.39988	0	45.9894	0.758275	5.66757	0	7.43098	0	0	0	0	0	0	0	58	1	7	0	10	0	0	0	0	0	0
FBgn0031562	797.895	1.98762	0.397421	6.02531e-07	2.54371e-06	TRUE	CG3604	protein_coding	4.9904	330.842	1849.02	2200.82	1772.44	3126.39	1462.8	294.258	1028.64	179.452	185.324	472.416	309.517	438	2348	2898	2167	3546	2005	315	998	181	210	256	273
FBgn0264604	1.55409	1.98558	0.704752	0.0115692	0.0214824	TRUE	lncRNA:CR43953	ncRNA	2.52502	2.28349	5.52219	2.27164	8.14647	3.47607	2.19874	0.937611	1.02143	0.983033	0	0	1.13298	3	7	3	10	4	3	1	1	1	0	0	1
FBgn0035313	7.64611	1.98441	0.538997	0.000299883	0.000817165	TRUE	CG13810	protein_coding	3.6154	5.35464	19.0265	10.6153	10.528	6.76967	11.1407	3.82857	1.00466	0	3.44816	1.85722	2.25212	7	24	14	13	8	15	4	1	0	4	1	2
FBgn0265803	2.24138	1.97758	0.665924	0.00537517	0.0109728	TRUE	asRNA:CR44592	ncRNA	2.78365	1.52456	2.3699	6.81713	1.62663	4.3133	4.41349	0	0	0	1.74039	0	1.13099	2	3	9	2	5	6	0	0	0	2	0	1
FBgn0034279	48.6728	1.97402	0.305395	1.11414e-10	7.46247e-10	TRUE	CG18635	protein_coding	6.45059	39.0371	117.406	91.0042	112.477	64.9267	78.8687	19.1965	16.0387	18.4972	11.1869	46.4251	15.7519	51	148	120	139	77	106	20	16	19	13	25	14
FBgn0265137	3469.11	1.9734	0.112525	7.51997e-69	5.11129e-66	TRUE	Spn42Da	protein_coding	17.5367	6584.88	8484.07	7021.26	8358.98	5265.37	6546.02	1728.44	2072.6	1648.67	1538.89	1896.91	1808.74	8563	11097	9511	10785	6398	9038	1767	2024	1625	1748	1013	1574
FBgn0039818	16.4417	1.97072	0.452237	1.50839e-05	5.10623e-05	TRUE	CG11318	protein_coding	4.32746	11.4865	38.8882	18.203	38.8194	25.2346	44.6976	2.88502	5.0044	5.83656	9.45446	14.8548	3.37351	15	49	24	48	30	60	3	5	6	11	8	3
FBgn0038973	11.3794	1.9685	0.613736	0.00119659	0.00285592	TRUE	Pebp1	protein_coding	3.23969	8.36891	11.8287	15.9004	13.8557	9.57966	16.1072	0	1.02275	1.96739	0	7.43449	4.53428	11	15	21	17	11	22	0	1	2	0	4	4
FBgn0264556	1.26742	1.9675	0.790791	0.0147498	0.0266171	TRUE	Gr39a	protein_coding	2.43846	0	7.97678	2.28348	4.09025	1.7	0.751882	0	1.02434	0	0	0	0	0	10	3	5	2	1	0	1	0	0	0	0
FBgn0031104	35.4316	1.96732	0.310563	2.82825e-10	1.81801e-09	TRUE	jb	protein_coding	6.30791	42.5431	69.3128	92.369	51.4211	75.3768	72.26	21.4253	9.23948	14.7856	26.3082	7.43467	15.8973	56	88	122	63	86	99	23	9	15	30	4	14
FBgn0015522	397.961	1.96535	0.221692	7.84897e-19	1.11245e-17	TRUE	olf186-M	protein_coding	8.86214	594.536	867.547	922.088	837.881	642.925	860.016	192.63	149.543	171.451	174.855	356.568	141.831	777	1094	1216	1035	761	1157	201	149	176	203	192	126
FBgn0014018	3362.24	1.96507	0.118716	1.55005e-61	6.058e-59	TRUE	Rel	protein_coding	16.5519	5478.64	8654.75	7022.94	7532.96	6113.41	5918.42	1606.94	2034.85	1573.04	1433.88	1934.08	1776.05	7179	11079	9303	9313	7199	7912	1655	2027	1590	1664	1045	1546
FBgn0039551	2.6068	1.96349	0.766062	0.0211385	0.0366322	TRUE	Or98a	protein_coding	2.3055	0.764297	5.54458	9.09665	14.5928	5.1014	5.92751	4.76794	0	0	0	0	1.12728	1	7	12	18	6	8	5	0	0	0	0	1
FBgn0035619	9.03452	1.96276	0.610386	0.0015144	0.00353316	TRUE	Alp10	protein_coding	3.17191	14.5383	22.2042	6.82467	27.5244	10.9827	17.0964	0.958375	5.01814	5.84489	5.16807	0	1.12564	19	28	9	34	13	23	1	5	6	6	0	1
FBgn0001148	49.1213	1.96118	0.245093	1.51623e-15	1.61137e-14	TRUE	gsb	protein_coding	7.97562	84.1573	137.964	118.29	119.833	77.784	68.3591	22.987	36.1482	24.3598	33.6052	14.8574	15.7617	110	174	156	148	92	92	24	36	25	39	8	14
FBgn0053679	3.02121	1.95928	0.597319	0.00192214	0.00437901	TRUE	CG33679	protein_coding	3.10201	7.6218	6.31901	6.81693	7.32092	2.58959	2.20606	1.88495	0	1.96185	0.870468	0	1.13115	10	8	9	9	3	3	2	0	2	1	0	1
FBgn0040796	39.7598	1.95923	0.454553	1.9696e-05	6.54427e-05	TRUE	CG13064	protein_coding	4.26831	107.864	113.843	88.9073	76.795	66.1925	111.838	21.5808	66.1294	11.0102	15.2783	0	13.9226	145	146	116	93	72	156	24	63	11	17	0	12
FBgn0283451	1833.11	1.95813	0.451583	1.53971e-05	5.20325e-05	TRUE	br	protein_coding	4.32293	576.215	5056.83	5302.87	6145.82	3808.03	3423.67	497.967	3075.55	435.737	405.177	622.231	497.182	799	5344	5545	6081	3739	3753	550	2437	476	497	362	491
FBgn0039241	6144.1	1.95674	0.173691	1.9478e-29	6.53432e-28	TRUE	CG11089	protein_coding	11.2653	14998.8	14158.2	9435.31	11826.9	8291.52	11904.3	2689.45	3631.09	2515.63	2073.23	4029.83	2969.2	19527	17781	12406	14575	9806	15941	2805	3631	2592	2429	2170	2644
FBgn0036352	92.2902	1.9558	0.46098	2.75141e-05	8.93308e-05	TRUE	CG14110	protein_coding	4.19312	278.855	218.524	179.638	301.737	194.292	173.923	115.181	53.4815	24.4222	64.8755	1.85762	47.37	365	276	237	372	228	235	121	53	25	75	1	42
FBgn0266973	20.8418	1.95534	0.334042	6.47823e-09	3.56851e-08	TRUE	lncRNA:CR45424	ncRNA	5.80392	27.1094	57.066	47.4017	46.9307	36.1217	52.5961	13.3656	16.9253	3.31125	13.7803	5.19248	13.4333	35	79	73	55	40	75	12	16	5	13	3	9
FBgn0053462	154.712	1.95469	0.238244	2.46254e-16	2.79774e-15	TRUE	CG33462	protein_coding	8.1971	184.834	332.444	532.05	292.915	318.339	166.395	71.3084	93.9342	55.7098	73.5802	72.4505	90.2595	242	420	702	361	373	225	75	93	57	85	39	80
FBgn0085340	0.855847	1.94715	0.804308	0.0242784	0.0413177	TRUE	CR34311	pseudogene	2.25269	3.74544	3.12715	0	4.11719	1.81847	1.43838	0	0	0	0	0	0	5	4	0	5	2	2	0	0	0	0	0	0
FBgn0042102	21.8771	1.94567	0.509776	0.000135006	0.000392004	TRUE	CG18745	protein_coding	3.81714	6.11974	39.6396	43.2197	40.4909	37.2279	44.5658	5.74349	1.00457	2.92387	6.03386	27.8582	5.63011	8	50	57	50	44	60	6	1	3	7	15	5
FBgn0283427	4145.8	1.94122	0.182571	2.10625e-26	5.5062e-25	TRUE	FASN1	protein_coding	10.6324	9973.91	8540.33	7576.83	6153.07	5328.11	6243.3	1878.2	2065.38	1410.77	1438.61	2739.64	1684.92	13007	10839	9998	7619	6356	8347	1947	2071	1448	1676	1471	1498
FBgn0266853	1.25793	1.94088	0.789838	0.0156259	0.0280299	TRUE	lncRNA:CR45314	ncRNA	2.41754	2.29263	0.791992	0.75803	4.86495	0.850767	6.66635	0.953121	0	0	0	0	0	3	1	1	6	1	9	1	0	0	0	0	0
FBgn0010300	2407.27	1.94018	0.328142	3.48988e-09	1.98174e-08	TRUE	brat	protein_coding	5.90672	2700.31	8004.25	6354.47	6499.47	3513.46	5061.05	1292.93	3143.25	939.211	868.32	567.508	1075.93	3612	8339	6483	6642	3736	5559	1499	3235	1108	1149	331	1060
FBgn0058298	111.013	1.93979	0.427216	5.92497e-06	2.14907e-05	TRUE	CG40298	protein_coding	4.52905	9.17054	10.2959	15.1606	3.2433	15.3138	7.40705	0.953121	0	0.97637	1.72863	9.28766	2.25488	12	13	20	4	18	10	1	0	1	2	5	2
FBgn0036948	21.1938	1.93942	0.382289	4.79478e-07	2.05755e-06	TRUE	CG7298	protein_coding	5.03435	20.6437	62.5984	59.1345	33.2236	38.1811	51.9199	7.64113	8.05076	7.80412	22.4424	9.28689	7.88722	27	79	78	41	45	70	8	8	8	26	5	7
FBgn0038838	365.582	1.93928	0.182115	1.81619e-26	4.79604e-25	TRUE	TotB	protein_coding	10.6462	480.278	353.744	390.867	407.445	374.573	486.759	109.073	113.577	138.444	118.103	37.1644	112.773	634	450	516	498	423	670	118	110	140	134	20	99
FBgn0265660	2.36803	1.93917	0.751187	0.00555257	0.0112981	TRUE	lncRNA:CR44467	ncRNA	2.7731	2.28569	0	8.33094	0	4.32426	1.4693	0	0	0	0	1.85841	0	3	0	11	0	5	2	0	0	0	0	1	0
FBgn0035868	175.776	1.93664	0.167637	7.8039e-31	2.98285e-29	TRUE	CG7194	protein_coding	11.5452	221.752	314.61	350.268	332.193	223.868	296.771	67.8454	99.5925	70.224	54.3644	91.0099	68.7225	290	397	462	410	264	400	71	99	72	63	49	61
FBgn0037811	233.053	1.93584	0.153957	3.18238e-36	1.85635e-34	TRUE	CG12592	protein_coding	12.5676	325.389	348.339	397.411	318.72	439.549	463.861	128.756	68.1055	114.826	107.493	96.5598	74.2356	425	439	524	394	522	623	134	68	118	125	52	66
FBgn0039315	11.5927	1.93401	0.599865	0.00143262	0.00335826	TRUE	CG13658	protein_coding	3.188	1.52921	2.37722	6.06512	7.29273	5.93837	5.93417	0.955256	0	0	0	1.85737	2.25341	2	3	8	9	7	8	1	0	0	0	1	2
FBgn0041194	1735.7	1.93291	0.367426			FALSE	Prat2	protein_coding	5.26281	2004.55	2989.55	2625.66	2863.31	2705.86	2900.61	542.374	565.035	326.845	204.667	1947.04	317.011	2621	3772	3465	3539	3210	3904	566	564	336	238	1039	282
FBgn0266653	10.097	1.93143	0.432412	1.09711e-05	3.8063e-05	TRUE	asRNA:CR45160	ncRNA	4.39709	13.5902	6.27692	23.5117	10.6605	24.139	13.0245	5.50676	3.11292	0	6.19891	1.85706	3.42962	18	8	31	13	27	18	6	3	0	7	1	3
FBgn0261503	15.8851	1.92788	0.347576	3.88991e-08	1.94346e-07	TRUE	lncRNA:CR42651	ncRNA	5.49578	25.2594	22.212	27.3013	29.1307	23.6094	24.5536	3.83935	2.00482	4.86766	4.30262	11.142	13.5016	33	28	36	36	28	33	4	2	5	5	6	12
FBgn0038250	1472.94	1.9272	0.193719	2.59276e-23	5.31924e-22	TRUE	CG3505	protein_coding	9.94724	3341.41	3321.89	2582.67	3005.42	2307.07	2901.27	718.912	856.598	669.69	456.255	1144.22	663.992	4372	4194	3407	3707	2713	3916	754	850	686	528	616	589
FBgn0263495	42.491	1.92689	0.273266	2.03038e-12	1.60551e-11	TRUE	lncRNA:CR43484	ncRNA	7.03238	62.056	52.4106	63.3135	48.9192	63.0567	52.7864	14.8934	13.6035	15.6908	24.0253	8.22923	7.03066	75	61	80	56	67	64	18	15	18	31	5	7
FBgn0000594	7.86672	1.92478	0.474096	6.80162e-05	0.000207392	TRUE	Est-P	protein_coding	3.98312	11.4774	22.204	6.06636	24.2866	16.0527	11.1495	6.70828	1.00367	2.92251	5.16824	3.71425	1.12565	15	28	8	30	19	15	7	1	3	6	2	1
FBgn0002629	16.4439	1.92313	0.617761	0.00244357	0.00544553	TRUE	E(spl)m4-BFM	protein_coding	3.03024	6.09773	85.3107	27.2681	47.99	38.8338	30.8888	7.54129	28.4781	0.980845	0.870359	3.71659	6.78654	8	108	36	59	45	42	8	28	1	1	2	6
FBgn0003719	289.202	1.91949	0.167363	2.0184e-30	7.51275e-29	TRUE	tld	protein_coding	11.4632	608.917	667.597	644.727	642.766	465.428	488.997	166.531	206.022	158.496	139.154	100.266	140.523	795	841	850	795	554	656	173	206	163	162	54	125
FBgn0026320	147.212	1.9179	0.562613	0.000870897	0.00214582	TRUE	Tom	protein_coding	3.32922	136.671	486.627	369.822	410.736	298.406	458.825	88.2957	269.993	27.3825	52.8521	3.71561	32.7327	179	615	488	506	349	621	93	267	28	61	2	29
FBgn0036950	37.6186	1.91754	0.292937	6.91107e-11	4.71794e-10	TRUE	CG6996	protein_coding	6.52257	56.0103	43.7342	58.7117	63.4324	102.086	72.2156	15.3426	12.1114	24.4645	24.2417	13.0453	9.04291	73	55	79	81	120	97	16	12	25	28	7	8
FBgn0053200	47.287	1.91374	0.307143	4.93144e-10	3.08126e-09	TRUE	VepD	protein_coding	6.22127	37.6887	75.4946	44.8186	69.0887	73.7619	56.3091	14.7974	33.3911	13.5199	7.88818	16.7525	5.47097	61	92	58	86	75	79	18	27	11	9	9	6
FBgn0250869	4459.28	1.91261	0.223395	1.11951e-17	1.44519e-16	TRUE	CG42240	protein_coding	8.56094	4936.28	11594.5	10360.6	9703.27	6289.74	7716.9	2032.09	2730.85	1755.94	1258.35	3337.37	1981.9	6449	14534	13535	11985	7547	10285	2097	2733	1815	1491	1786	1768
FBgn0086347	3654.15	1.91231	0.176605	2.54027e-27	7.25997e-26	TRUE	Myo31DF	protein_coding	10.8279	5608.29	8190.49	6127.18	7465.81	4830.03	6109.4	1493.03	1778.07	1348.58	1212.39	2720.68	1478.06	7378	10374	8123	9266	5758	8196	1545	1769	1378	1408	1460	1305
FBgn0264516	71.5443	1.91186	0.207908	4.43079e-20	6.99662e-19	TRUE	CG43915	protein_coding	9.17705	86.2337	68.0141	83.3485	64.9782	83.1695	83.3737	23.6841	7.09088	26.428	23.4256	26.0115	15.812	113	86	110	80	97	113	25	7	27	27	14	14
FBgn0051464	0.920797	1.91031	0.803328	0.0289686	0.0483521	TRUE	CG31464	protein_coding	2.18391	1.52409	7.89732	2.27222	0.813595	0	2.94001	0	0	0	0	0	0	2	10	3	1	0	4	0	0	0	0	0	0
FBgn0259748	44.5087	1.90866	0.567953	0.000728714	0.00182769	TRUE	CG42397	protein_coding	3.37854	11.4136	92.2708	15.1437	44.0062	66.154	173.56	8.42807	3.06728	5.90122	13.9842	53.8997	2.26688	15	117	20	54	76	237	9	3	6	16	29	2
FBgn0043865	138.114	1.9054	0.283729	1.94182e-11	1.3957e-10	TRUE	SA-2	protein_coding	6.71033	208.325	195.269	282.918	187.585	246.216	235.524	69.2943	26.0068	96.2721	92.7805	37.1358	21.3607	272	246	373	232	293	316	72	26	99	108	20	19
FBgn0262148	99.8766	1.90499	0.243324	5.36202e-15	5.40106e-14	TRUE	lncRNA:CR42874	ncRNA	7.81812	148.347	249.633	156.939	285.193	144.14	192.912	45.8715	78.461	37.0613	35.378	33.4321	73.2269	194	315	207	352	170	260	48	78	38	41	18	65
FBgn0036466	3.84301	1.90235	0.633453	0.00367969	0.0078564	TRUE	CG18581	protein_coding	2.90439	9.89368	4.73262	5.3004	2.44435	10.4361	2.19794	1.87415	2.04379	0	0	0	2.26635	13	6	7	3	12	3	2	2	0	0	0	2
FBgn0027929	125.692	1.90065	0.227432	6.88218e-17	8.2507e-16	TRUE	NimB1	protein_coding	8.34904	184.947	371.635	135.722	311.147	171.492	208.326	62.0149	69.5065	47.7736	60.4335	61.3093	59.7369	242	469	179	384	202	281	65	69	49	70	33	53
FBgn0037162	3.21191	1.89901	0.693662	0.00988545	0.018704	TRUE	CG11449	protein_coding	2.57981	5.3552	11.1	6.06606	14.5752	0.845707	7.42932	2.87276	3.01286	0	0.861788	1.85719	0	7	14	8	18	1	10	3	3	0	1	1	0
FBgn0265671	1.65099	1.89689	0.740923	0.0174707	0.0309133	TRUE	lncRNA:CR44478	ncRNA	2.37665	0	3.12151	5.35537	4.9504	3.66546	4.30518	1.80271	0	0.999793	0	0	0	0	4	7	6	4	6	2	0	1	0	0	0
FBgn0020376	1.22689	1.89595	0.761638	0.0118448	0.0219473	TRUE	Sr-CIII	protein_coding	2.51674	3.05692	2.37604	3.79018	0.8108	0.850651	2.22227	0	0	0.976327	0	0	0	4	3	5	1	1	3	0	0	1	0	0	0
FBgn0034215	2747.52	1.89078	0.162493	2.72715e-31	1.07661e-29	TRUE	Mtap	protein_coding	11.6353	3701.41	6453.07	6001.34	6485.06	4381.83	5604.19	1358.2	2085.91	1204.58	1057.69	1542.7	1433.52	4827	8117	7889	7955	5150	7540	1422	2058	1232	1235	837	1275
FBgn0036648	188.193	1.89057	0.118562	3.90667e-57	1.19751e-54	TRUE	CG4098	protein_coding	15.9303	175.764	190.865	170.556	205.145	199.958	182.201	47.6509	59.4803	43.9386	50.1337	59.4413	42.844	230	241	225	253	235	246	50	59	45	58	32	38
FBgn0035977	189.08	1.88415	0.178541	5.35673e-26	1.35724e-24	TRUE	PGRP-LF	protein_coding	10.545	492.43	427.13	359.364	413.228	254.429	368.713	93.6361	90.5461	119.971	87.1613	105.869	121.676	644	539	474	510	300	497	98	90	123	101	57	108
FBgn0265048	1320.77	1.88133	0.164902	3.80789e-30	1.36848e-28	TRUE	cv-d	protein_coding	11.4081	1718.47	2706.1	2347.74	2731.76	2015.6	1997.11	559.018	688.381	496.619	438.59	920.909	525.923	2243	3408	3095	3380	2403	2677	580	689	511	511	496	468
FBgn0265828	21.5059	1.87919	0.415842	6.89495e-06	2.47222e-05	TRUE	lncRNA:CR44617	ncRNA	4.49691	21.0908	25.0785	34.9333	11.496	56.6467	28.8794	3.65567	6.24272	5.96206	14.2094	0	11.4604	28	32	46	14	63	40	4	6	6	16	0	10
FBgn0031554	195.855	1.87832	0.249568	5.33853e-14	4.9006e-13	TRUE	CG15418	protein_coding	7.52336	273.81	241.965	379.903	246.663	301.279	333.488	95.9443	27.1561	86.9492	133.843	69.8819	51.8407	349	306	487	295	320	444	108	28	93	153	39	49
FBgn0035934	77.3428	1.87712	0.369528	3.89857e-07	1.69957e-06	TRUE	TrpA1	protein_coding	5.07384	33.7481	160.863	134.419	291.454	93.5062	103.965	43.0224	46.4232	25.6336	24.6704	49.5013	18.3571	43	203	174	362	111	138	45	48	26	30	27	17
FBgn0286723	3734.88	1.87649	0.171166	5.80921e-28	1.72653e-26	TRUE	hll	protein_coding	10.9622	8298.96	8242.35	7855.41	8476.7	6320.22	6073.25	1891.76	3163.43	1716.01	1349.77	1925.68	2099.22	10841	10389	10358	10477	7500	8160	1970	3157	1763	1569	1037	1866
FBgn0026397	14.9508	1.87282	0.447089	3.03667e-05	9.78607e-05	TRUE	Or22b	protein_coding	4.1707	26.7587	21.393	26.5342	12.156	23.7657	25.9552	8.59383	3.01972	2.92689	0	18.574	3.38052	35	27	35	15	28	35	9	3	3	0	10	3
FBgn0039736	39.1104	1.86988	0.335007	2.82358e-08	1.43595e-07	TRUE	CG7912	protein_coding	5.55204	42.8612	115.811	109.203	140.003	43.0211	78.1084	23.0283	30.0803	26.289	19.7962	16.7133	20.2544	56	146	144	173	51	105	24	30	27	23	9	18
FBgn0038602	8.76215	1.86876	0.545104	0.000825967	0.00204601	TRUE	CG7126	protein_coding	3.34394	28.9279	28.4035	15.9018	19.5484	17.3695	11.7302	15.0091	5.10512	1.96567	3.49219	1.85856	0	38	36	21	24	20	16	16	5	2	4	1	0
FBgn0053269	2.7811	1.86805	0.715822	0.0108072	0.0202165	TRUE	CG33269	protein_coding	2.54887	7.38432	5.51423	8.62899	1.37268	3.87003	6.08708	2.55144	0	0	3.79398	0	0	7	5	8	4	3	8	2	0	0	3	0	0
FBgn0267787	4.05795	1.86711	0.510829	0.000441516	0.00116101	TRUE	lncRNA:CR46118	ncRNA	3.51394	7.60079	3.15184	8.32833	10.6054	6.9966	8.76774	0.933065	3.076	0.985017	3.50415	1.85869	0	10	4	11	13	8	12	1	3	1	4	1	0
FBgn0085222	7.98132	1.862	0.597846	0.00280391	0.00616246	TRUE	CG34193	protein_coding	2.98846	14.8152	27.356	27.5212	13.4722	13.2219	18.0528	8.17594	12.369	1.41166	0	0	4.98167	12	42	33	29	21	29	4	12	2	0	0	4
FBgn0265804	7.24407	1.86034	0.509311	0.000339727	0.000913949	TRUE	lncRNA:CR44593	ncRNA	3.58296	7.6473	4.75524	15.1635	9.72162	4.23777	7.42116	1.9119	0	0.975173	2.58814	5.57195	1.12647	10	6	20	12	5	10	2	0	1	3	3	1
FBgn0020416	446.764	1.85933	0.462994	5.65152e-05	0.000174285	TRUE	Idgf1	protein_coding	4.02691	263.854	764.868	407.15	714.463	575.219	708.147	93.7176	81.4348	57.5264	34.5005	520.041	47.3066	345	965	537	882	679	954	98	81	59	40	280	42
FBgn0285958	390.354	1.85764	0.133648	6.79806e-44	6.7803e-42	TRUE	Fuca	protein_coding	13.8949	648.665	944.013	788.777	851.038	542.642	729.322	206.471	264.141	209.015	171.751	193.563	186.114	876	1189	1036	1049	645	978	213	260	212	197	103	165
FBgn0266161	1.57381	1.8572	0.784957	0.0337656	0.0553078	FALSE	lncRNA:CR44867	ncRNA	2.12286	0.738238	6.99931	0.771692	3.31163	6.50002	5.72216	0	3.15817	0	0	0	0	1	9	1	4	7	8	0	3	0	0	0	0
FBgn0036138	1.59551	1.85536	0.795391	0.0252327	0.0427881	TRUE	CG14143	protein_coding	2.23782	4.53528	0	1.51617	0	13.3698	2.8979	0	0	0	0.884209	0	1.14182	6	0	2	0	15	4	0	0	0	1	0	1
FBgn0038114	17.4627	1.84838	0.485807	0.000166839	0.000478479	TRUE	CG11670	protein_coding	3.76457	19.1426	37.7281	27.2225	42.787	52.7157	44.2155	6.84908	29.2468	6.50465	8.84005	0	1.154	25	48	36	53	63	60	7	30	7	10	0	1
FBgn0041622	2.08178	1.84648	0.730693	0.0101032	0.0190684	TRUE	Or69a	protein_coding	2.57228	3.82133	3.96025	1.51609	2.43225	0	5.92685	0	0	0	0	0	2.25467	5	5	2	3	0	8	0	0	0	0	0	2
FBgn0053258	11.7597	1.8448	0.632961	0.00352181	0.00755647	TRUE	CG33258	protein_coding	2.91809	5.78589	59.2115	13.639	14.6089	8.09884	8.39846	5.39602	1.91566	5.83201	0.820705	5.2793	3.20743	8	79	19	19	10	12	6	2	5	1	3	3
FBgn0025709	60.173	1.841	0.37016	6.5217e-07	2.73628e-06	TRUE	CNT2	protein_coding	4.97509	30.6534	87.3359	113.846	80.9643	97.0205	73.6278	22.1026	14.0499	13.6452	10.3382	44.6202	23.6553	40	110	150	100	116	99	23	14	14	12	24	21
FBgn0039101	47.5746	1.84078	0.25197	3.26414e-13	2.81363e-12	TRUE	CG16710	protein_coding	7.28303	78.728	121.989	80.3553	132.945	81.5917	87.4473	33.3854	9.06677	33.1858	28.5084	27.8621	25.9252	103	154	106	164	96	118	35	9	34	33	15	23
FBgn0063495	354.864	1.84055	0.42126	1.27192e-05	4.36528e-05	TRUE	GstE5	protein_coding	4.36488	336.795	985.502	577.131	1070	510.002	635.626	133.684	99.7754	74.584	69.6855	594.678	73.5497	442	1248	762	1315	590	865	142	98	76	80	320	65
FBgn0029856	273.448	1.83722	0.204445	2.65139e-19	3.9214e-18	TRUE	CG11700	protein_coding	8.98231	324.979	545.214	576.956	516.119	513.898	555.692	166.264	82.4928	155.08	213.147	105.869	103.648	425	688	761	637	606	749	174	82	159	247	57	92
FBgn0037646	325.32	1.83528	0.313899	5.07224e-09	2.82689e-08	TRUE	CAHbeta	protein_coding	5.84478	589.152	588.713	544.439	716.553	528.299	566.75	142.988	227.779	102.889	57.5977	325.724	88.9518	771	743	715	879	624	768	151	223	104	66	176	79
FBgn0038020	1152.2	1.83394	0.170711	6.48439e-27	1.77221e-25	TRUE	GstD9	protein_coding	10.7417	1495.81	2672	2324.45	2739.57	1923.84	1929.02	548.355	416.94	674.929	833.781	635.821	506.856	1963	3383	3072	3377	2231	2624	581	410	688	958	342	448
FBgn0032491	2.29012	1.83386	0.683493	0.0125559	0.0230953	TRUE	CG16815	protein_coding	2.49612	1.52362	7.10556	7.57338	3.25557	4.32712	8.07852	0	0	3.92692	0	1.85842	1.13185	2	9	10	4	5	11	0	0	4	0	1	1
FBgn0264960	0.854392	1.83376	0.800611	0.0359668	0.0584716	FALSE	lncRNA:CR44129	ncRNA	2.0973	0.714525	5.39324	0.796841	0.835658	2.87006	3.56549	0	0	0	0	0	1.20325	1	7	1	1	3	5	0	0	0	0	0	1
FBgn0267647	0.621631	1.83371	0.786605	0.0231891	0.0396886	TRUE	lncRNA:CR45985	ncRNA	2.2703	1.31088	1.50798	0.867797	2.58094	1.00262	2.15563	0	0	0	0	0	0	2	2	1	3	1	3	0	0	0	0	0	0
FBgn0041621	1.48468	1.83355	0.804365	0.0439607	0.0695584	FALSE	Or82a	protein_coding	2.01447	0	1.58397	9.85436	7.29752	0.850817	5.18478	0	0	1.95278	0	0	0	0	2	13	9	1	7	0	0	2	0	0	0
FBgn0041243	10.6281	1.833	0.611772	0.00289122	0.00633741	TRUE	Gr43a	protein_coding	2.97907	5.23188	5.72098	41.6353	5.53977	43.8398	6.53038	5.91659	5.18313	3.01606	2.52745	5.393	1.16139	7	7	56	7	53	9	6	5	3	3	3	1
FBgn0032387	209.647	1.83163	0.26624	6.32371e-12	4.7551e-11	TRUE	CG16965	protein_coding	6.87216	818.392	476.85	398.921	419.875	255.24	355.085	111.426	176.316	120.68	139.338	51.9945	134.986	1069	601	526	519	303	477	116	176	124	162	28	120
FBgn0000357	21.8017	1.83118	0.280652	9.07233e-11	6.12912e-10	TRUE	Cp18	protein_coding	6.48165	23.5868	52.0486	53.7587	41.5636	37.4364	35.8803	9.36311	7.15796	12.7869	10.4891	18.5863	10.2013	31	66	71	51	43	49	10	7	13	12	10	9
FBgn0284237	132.66	1.82657	0.522111	0.000517371	0.00134086	TRUE	CG46321	protein_coding	3.4716	219.15	775.894	232.887	326.457	44.4193	181.359	162.992	95.8644	13.6023	54.0509	31.5625	68.5368	286	977	307	404	53	243	169	96	14	63	17	61
FBgn0037397	2.28624	1.82417	0.623851	0.00599941	0.0121002	TRUE	CR1075	pseudogene	2.74781	3.05179	4.74402	4.54597	4.87481	6.00993	2.21199	1.89278	0	0	0.868179	0	2.25954	4	6	6	6	7	3	2	0	0	1	0	2
FBgn0265715	2.37771	1.81725	0.740123	0.0178065	0.0314257	TRUE	lncRNA:CR44522	ncRNA	2.36962	0.743453	5.45694	7.66844	9.9109	0.920121	3.58384	1.79732	0	0	0	1.84719	1.16086	1	7	10	12	1	5	2	0	0	0	1	1
FBgn0035132	871.716	1.81667	0.164786	2.96745e-28	9.18615e-27	TRUE	mthl10	protein_coding	11.0228	1397.66	2122.08	1539.96	2029.74	1343.52	1532.44	455.109	709.467	437.026	389.422	347.622	448.1	1810	2631	1990	2481	1577	2026	473	719	445	456	188	398
FBgn0003892	1275.08	1.81655	0.336079	6.68206e-08	3.24613e-07	TRUE	ptc	protein_coding	5.39952	1401.42	3492.53	3629.8	3651.87	1718.6	2542.38	654.71	1892.67	484.872	565.47	291.492	507.881	1829	4398	4785	4519	2050	3407	679	1895	499	659	157	452
FBgn0039832	41.8091	1.81297	0.235784	1.78015e-14	1.70731e-13	TRUE	CG15563	protein_coding	7.66559	50.9816	96.2179	81.019	78.2331	53.0916	76.1649	14.0478	18.4029	21.637	26.219	24.1618	17.0012	67	122	107	96	61	104	15	18	22	30	13	15
FBgn0036264	33.3719	1.81228	0.370164	1.04924e-06	4.26933e-06	TRUE	CG11529	protein_coding	4.88217	19.8746	80.8044	54.5821	79.4353	70.5127	48.1805	21.9463	10.0715	6.83143	13.8193	29.7192	13.5249	26	102	72	98	83	65	23	10	7	16	16	12
FBgn0267762	40.6428	1.81077	0.276774	7.06458e-11	4.81852e-10	TRUE	asRNA:CR46093	ncRNA	6.51928	104.605	99.7016	51.533	99.0283	62.4092	77.5842	22.7883	32.3561	23.4697	9.53011	18.578	29.3457	137	126	68	122	73	105	24	32	24	11	10	26
FBgn0036956	55.02	1.81045	0.376975	1.55989e-06	6.16267e-06	TRUE	CG13813	protein_coding	4.80341	29.0668	72.9317	74.3062	66.4108	64.3276	46.785	20.0961	2.00963	4.87373	25.8643	14.8579	24.7747	38	92	98	82	76	63	21	2	5	30	8	22
FBgn0266855	2.8786	1.81035	0.71805	0.0096011	0.0182374	TRUE	lncRNA:CR45316	ncRNA	2.58987	2.29374	0	6.06507	4.86202	1.69699	2.22511	0.955119	0	0	0.863182	0	0	3	0	8	6	2	3	1	0	0	1	0	0
FBgn0004110	13.5129	1.81014	0.346455	2.39254e-07	1.07294e-06	TRUE	tin	protein_coding	5.16592	13.0064	37.267	33.364	36.4348	21.9797	24.5216	9.57885	7.02827	8.76919	7.75459	3.71432	6.75482	17	47	44	45	26	33	10	7	9	9	2	6
FBgn0010246	2578.51	1.80948	0.261769	4.7549e-12	3.63489e-11	TRUE	Myo61F	protein_coding	6.91271	2707.05	5582.97	4098.07	4872.81	3460.52	3876.07	1076.07	1248.51	698.102	604.251	2252.95	904.534	3520	7033	5379	6036	4090	5216	1127	1270	725	712	1206	813
FBgn0039024	559.402	1.80946	0.495082			FALSE	Nepl15	protein_coding	3.66899	290.132	938.565	687.861	731.401	787.897	727.908	83.5465	72.1453	42.8267	25.8079	679.65	120.372	379	1183	907	904	935	978	87	72	44	30	366	107
FBgn0052641	189.101	1.80779	0.23012	4.04086e-15	4.11536e-14	TRUE	CG32641	protein_coding	7.85365	214.093	188.949	174.58	299.585	233.339	213.145	83.2843	72.765	79.4454	30.1654	24.1326	73.2838	284	241	230	365	260	295	91	70	80	34	13	64
FBgn0267275	1.51532	1.80658	0.763223	0.0181241	0.0319393	TRUE	lncRNA:CR45711	ncRNA	2.36307	2.28198	3.15379	7.57152	3.26081	0	1.46364	0	0	0	0	1.85864	1.13383	3	4	10	4	0	2	0	0	0	0	1	1
FBgn0265549	5.59974	1.80647	0.454526	0.000109224	0.000321735	TRUE	lncRNA:CR44399	ncRNA	3.86913	8.34758	8.65717	12.115	7.35291	11.4415	10.9275	2.78588	0	2.96097	4.39359	3.71721	1.13689	11	11	16	9	13	15	3	0	3	5	2	1
FBgn0267571	2.68695	1.80617	0.652012	0.00941786	0.0179519	TRUE	lncRNA:CR45911	ncRNA	2.5965	8.69338	14.8259	1.56539	2.23483	6.93945	3.84501	0.992898	2.06481	3.01079	0.886645	0	1.16023	11	19	2	3	8	5	1	2	3	1	0	1
FBgn0036009	3.19123	1.80571	0.650692	0.00756269	0.014877	TRUE	Or67a	protein_coding	2.67099	3.82436	6.34153	4.54929	6.47956	5.92672	9.65256	1.91346	0	0	2.58682	3.71451	0	5	8	6	8	7	13	2	0	0	3	2	0
FBgn0041229	4.20552	1.80467	0.560039	0.0018684	0.00426841	TRUE	Gr93a	protein_coding	3.11039	9.94243	7.92617	5.30737	9.72046	8.47107	11.877	1.91269	7.03732	1.95001	0	1.85728	0	13	10	7	12	10	16	2	7	2	0	1	0
FBgn0040729	17.0499	1.8027	0.680831	0.0075506	0.0148626	TRUE	CG15126	protein_coding	2.67153	5.43055	22.8208	13.4213	50.0504	22.687	57.242	1.70369	4.2143	1.03094	2.86399	24.6944	0	8	30	16	59	23	80	2	4	1	3	14	0
FBgn0001257	5319.1	1.80208	0.145932	4.98183e-35	2.65805e-33	TRUE	ImpL2	protein_coding	12.3482	6455.65	11514.6	10208.8	12213.2	10668.6	12418.7	2800.58	3958.57	2764.69	2394.86	2764.9	3330.99	8615	14608	13577	15065	12421	16564	2906	4028	2774	2811	1478	2949
FBgn0267408	1441.53	1.80169	0.283294	2.01715e-10	1.31611e-09	TRUE	AOX1	protein_coding	6.36003	1205.82	2416.07	2539.6	3027.08	2302.69	2273.35	597.351	466.717	477.254	535.7	1347.97	370.883	1574	3043	3348	3745	2744	3048	620	467	491	624	726	330
FBgn0030310	615.076	1.80147	0.189369	1.90923e-21	3.38401e-20	TRUE	PGRP-SA	protein_coding	9.50986	1068.19	1627.39	1335.46	1524.32	1146.85	1202.17	319.854	640.154	312.634	313.575	240.238	398.221	1408	2068	1765	1883	1337	1644	339	620	317	355	132	352
FBgn0043470	48.5641	1.79991	0.658511	0.000464359	0.00121495	TRUE	lambdaTry	protein_coding	3.50052	1.52693	2.37364	1.51564	0.811797	3.42136	2.95487	0	0	0	0	0	0	2	3	2	1	4	4	0	0	0	0	0	0
FBgn0002869	2377.1	1.79888	0.287217	3.81506e-10	2.41071e-09	TRUE	MtnB	protein_coding	6.26141	1162.38	4811.95	6223.73	6433.61	4545.27	4443.36	917.125	1818.62	1346.42	1342.29	848.601	1336.46	1627	6243	7786	7678	4740	6218	1054	1717	1333	1452	468	1107
FBgn0266239	18.6647	1.79502	0.399721	7.95781e-06	2.83059e-05	TRUE	lncRNA:CR44934	ncRNA	4.46632	21.332	18.1598	43.1689	26.856	32.8735	33.0544	9.4087	0	14.7244	11.3282	9.29194	1.13175	28	23	57	33	38	45	10	0	15	13	5	1
FBgn0267097	29.1518	1.79492	0.266105	1.8862e-11	1.35884e-10	TRUE	lncRNA:CR45537	ncRNA	6.71457	45.1205	53.8944	75.8182	42.1254	48.3025	46.7573	11.4729	5.02779	23.4029	20.7034	11.1438	13.5171	59	68	100	52	57	63	12	5	24	24	6	12
FBgn0264569	23.6056	1.7931	0.389636	4.61091e-06	1.70408e-05	TRUE	lncRNA:CR43941	ncRNA	4.58175	24.4684	33.2826	49.2797	34.0309	39.8621	48.2211	1.91088	1.00609	20.4831	18.123	5.57206	12.3931	32	42	65	42	47	65	2	1	21	21	3	11
FBgn0004589	69.7678	1.79058	0.297172	1.90769e-09	1.12074e-08	TRUE	Eig71Eb	protein_coding	6.00548	85.7191	240.661	202.519	129.178	125.852	163.186	30.8749	80.5503	41.7632	47.55	21.1337	38.4694	116	310	264	158	144	229	37	79	43	53	11	33
FBgn0040582	33.116	1.79001	0.645084	0.00523056	0.0107076	TRUE	CG5791	protein_coding	2.79248	20.5734	29.6248	19.8361	56.0692	50.1004	206.743	5.05103	2.33705	1.8238	4.0839	76.1275	2.5405	19	29	17	42	35	157	9	7	8	14	22	2
FBgn0037850	27.3629	1.78734	0.328336	5.97494e-08	2.92561e-07	TRUE	CG14695	protein_coding	5.41955	39.7323	56.2218	34.1097	87.5874	36.6171	54.0461	9.52427	5.04321	11.72	18.1589	20.4334	21.4259	52	71	45	108	43	73	10	5	12	21	11	19
FBgn0037436	0.612395	1.78416	0.784486	0.0256611	0.0433921	TRUE	Hr83	protein_coding	2.2313	0.762823	1.58108	1.51524	1.62524	1.71854	1.47405	0	0	0	0	0	0	1	2	2	2	2	2	0	0	0	0	0	0
FBgn0032139	491.174	1.78392	0.324366	3.78045e-08	1.89059e-07	TRUE	CG13116	protein_coding	5.50081	436.598	819.433	915.145	800.887	834.553	701.171	183.131	115.355	151.062	99.717	562.736	135.61	570	1033	1209	980	974	948	191	113	153	114	300	119
FBgn0033732	194.514	1.78161	0.357475	6.89475e-07	2.88505e-06	TRUE	CG13157	protein_coding	4.96431	769.902	628.178	215.367	525.272	242.219	339.129	120.852	163.487	165.55	117.084	29.713	144.048	1006	792	284	649	287	456	126	163	170	136	16	128
FBgn0036351	554.493	1.78048	0.404541	1.20869e-05	4.16291e-05	TRUE	CG14107	protein_coding	4.37601	1590.79	1329.01	993.439	1756.29	1041.07	1098.7	336.704	552.57	447.102	369.333	20.4367	365.811	2084	1680	1311	2163	1216	1488	355	546	457	426	11	324
FBgn0037012	440.743	1.77728	0.14198	6.23173e-36	3.50434e-34	TRUE	Rcd2	protein_coding	12.5143	638.459	1024.27	970.748	1010.5	706.065	720.513	257.388	284.549	217.044	215.051	217.264	272.235	834	1291	1280	1249	838	968	268	284	223	250	117	242
FBgn0004512	1221.32	1.77606	0.151343	8.54021e-32	3.495e-30	TRUE	Mdr49	protein_coding	11.7339	2965.35	2741.13	2390.95	2637.83	1696.69	2078.69	694.038	904.341	583.545	556.545	856.151	602.209	3890	3484	3198	3296	2008	2743	716	881	593	644	470	544
FBgn0036891	860.956	1.77518	0.31047	1.08087e-08	5.77094e-08	TRUE	CG9372	protein_coding	5.71752	775.061	1733.38	1498.36	1458.13	1424.97	1777.65	299.872	336.304	260.133	201.596	980.574	339.975	1013	2186	1976	1801	1686	2392	313	335	267	234	528	302
FBgn0266099	104.227	1.7746	0.227659	7.1273e-15	7.10593e-14	TRUE	CG44836	protein_coding	7.7822	162.025	246.957	207.342	269.286	164.663	137.358	45.8196	33.0627	67.1252	86.052	64.932	42.5689	266	513	388	481	259	269	43	24	62	73	27	35
FBgn0052268	32.4436	1.7738	0.672768	0.0122555	0.0226092	TRUE	Drsl6	protein_coding	2.5047	8.16547	28.0506	130.545	52.0605	189.032	68.7709	11.6636	69.3415	11.0212	6.30192	0	6.97591	11	36	170	63	205	96	13	66	11	7	0	6
FBgn0033051	222.318	1.77215	0.204978	5.55072e-18	7.37878e-17	TRUE	Strica	protein_coding	8.64144	302.183	462.362	511.123	465.587	311.132	439.362	104.794	168.951	77.9849	107.741	154.573	104.182	406	574	613	554	357	559	109	172	80	131	87	94
FBgn0000075	388.732	1.7703	0.263226	1.83299e-11	1.32173e-10	TRUE	amd	protein_coding	6.71874	747.269	1135.88	750.764	1195.79	659.763	751.273	236.441	407.799	224.079	243.187	76.2789	293.169	980	1438	994	1483	784	1014	247	407	230	283	41	261
FBgn0030443	8.00833	1.77002	0.526507	0.000942608	0.00230031	TRUE	CG12715	protein_coding	3.30712	7.69919	17.943	13.7317	23.6097	17.8235	13.4687	0.965102	13.1141	1.95907	0.865917	1.86812	4.52802	10	24	18	29	21	18	1	13	2	1	1	4
FBgn0038299	1184.64	1.76969	0.12435	5.96333e-46	7.1164e-44	TRUE	Spn88Eb	protein_coding	14.2301	1624.38	2281.85	2562.67	2734.01	2254.64	2073.8	589.963	779.239	646.474	625.372	664.912	634.157	2124	2879	3380	3375	2661	2794	617	775	663	725	358	563
FBgn0266883	11.0559	1.76812	0.411101	2.10233e-05	6.95278e-05	TRUE	lncRNA:CR45344	ncRNA	4.25374	12.8857	11.0098	22.7211	8.99546	17.6748	15.2703	3.70298	5.15711	4.94133	4.40253	3.71679	1.13835	17	14	30	11	20	21	4	5	5	5	2	1
FBgn0002734	30.21	1.7673	0.662333	0.0103298	0.0194303	TRUE	E(spl)mdelta-HLH	protein_coding	2.56459	35.1316	114.765	97.7682	92.5062	55.4931	42.1463	1.90106	79.8102	6.84229	5.19474	0	3.38499	46	145	129	114	65	57	2	79	7	6	0	3
FBgn0030492	2.16295	1.76387	0.719083	0.00793053	0.0154798	TRUE	CG15754	protein_coding	2.65501	1.52737	0	3.7894	3.24608	0.854034	2.21784	0	0	0	0	1.85774	0	2	0	5	4	1	3	0	0	0	0	1	0
FBgn0265185	414.872	1.76223	0.3111	1.48272e-08	7.76269e-08	TRUE	CG44250	protein_coding	5.66355	522.492	829.4	700.149	837.311	634.987	774.487	196.586	208.817	124.507	85.1369	456.384	142.039	683	1049	927	1035	748	1047	207	207	127	98	247	126
FBgn0052945	248.862	1.76209	0.191515	3.611e-20	5.74341e-19	TRUE	CG32945	protein_coding	9.19906	289.431	245.493	308.226	271.894	383.731	301.707	85.5351	46.8933	108.022	122.942	81.7719	73.5852	380	311	407	334	443	411	91	46	110	141	44	65
FBgn0261634	1.43143	1.76116	0.793696	0.0493019	0.0769429	FALSE	CG42717	protein_coding	1.96597	2.95407	8.55624	4.62845	4.96696	0	1.4307	0.89296	0	0	0	0	2.33629	4	11	6	6	0	2	1	0	0	0	0	2
FBgn0044810	28.3732	1.75776	0.483261	0.000283293	0.000776969	TRUE	TotX	protein_coding	3.63012	69.9159	27.5742	23.4709	8.97547	34.1341	130.74	8.39292	9.23184	5.9115	6.13436	29.7391	19.2963	92	35	31	11	39	179	9	9	6	7	16	17
FBgn0039299	9.63975	1.75726	0.548994	0.00180447	0.00413746	TRUE	CG11854	protein_coding	3.12066	8.40212	16.6233	31.0748	25.1512	23.8878	29.5869	4.75528	12.1177	5.86348	1.73098	0	9.02519	11	21	41	31	28	40	5	12	6	2	0	8
FBgn0264359	2.29741	1.757	0.719972	0.0175162	0.0309759	TRUE	lncRNA:CR43811	ncRNA	2.37569	3.03824	3.15011	0.757131	4.08175	1.75414	7.29673	1.86213	0	0	0	0	1.13573	4	4	1	5	2	10	2	0	0	0	0	1
FBgn0042106	31.9631	1.75579	0.306057	1.09302e-08	5.82782e-08	TRUE	CG18754	protein_coding	5.71562	67.9128	79.6605	60.4609	59.2663	48.3535	41.8055	15.698	19.2395	10.9617	28.9964	22.5019	5.84575	78	91	77	65	53	65	16	14	13	26	14	6
FBgn0034290	2352.45	1.75463	0.349897	5.47638e-07	2.32959e-06	TRUE	CG5773	protein_coding	5.00882	9687.24	3566.47	5100.54	3577.95	3333.84	4828.91	1306.49	1414.35	947.653	620.993	3046.29	1052.03	12677	4488	6656	4328	3703	6568	1391	1343	939	688	1615	905
FBgn0041336	2.04467	1.75137	0.702793	0.0143768	0.0260169	TRUE	Cyp6t2Psi	pseudogene	2.44771	1.52965	7.13375	1.5164	5.67008	1.69397	2.2271	0.956453	0	0	0	3.71455	0	2	9	2	7	2	3	1	0	0	0	2	0
FBgn0260429	28.9412	1.7492	0.267707	7.69226e-11	5.21932e-10	TRUE	CG42524	protein_coding	6.5065	38.891	67.3581	58.1877	53.842	43.8047	46.7846	17.1625	18.7618	7.28947	12.8857	6.13203	24.7869	48	84	75	68	53	66	18	20	8	16	3	21
FBgn0034457	0.828092	1.74826	0.798396	0.0400709	0.0641063	FALSE	Ir56c	protein_coding	2.05302	3.82563	3.17184	1.51657	1.61921	2.53532	0	0.958123	0	0	0	0	0	5	4	2	2	3	0	1	0	0	0	0	0
FBgn0264785	2574.85	1.74819	0.212282	1.80385e-16	2.07656e-15	TRUE	Hph	protein_coding	8.23445	2007.92	6207.63	4805.41	6100.6	4324.58	5529.99	1213.05	1817.96	1184.79	1233.95	1850.26	1144.12	2581	7252	5967	7065	4903	7036	1296	1846	1238	1483	1020	1060
FBgn0028430	5.878	1.74769	0.473094	0.00030792	0.00083673	TRUE	He	protein_coding	3.60854	11.7062	17.6226	7.04738	7.85885	6.46727	18.1258	2.61877	2.68448	4.57384	0.81261	5.43198	3.16297	16	24	10	10	8	23	3	2	5	1	3	3
FBgn0034663	14.1142	1.74729	0.698564	0.011451	0.0212927	TRUE	CG4363	protein_coding	2.52863	0.761428	56.8181	10.6018	4.88606	26.0267	28.6069	5.63301	4.08155	1.965	4.36296	3.717	4.53007	1	72	14	6	30	39	6	4	2	5	2	4
FBgn0014417	156.75	1.7464	0.199827	2.48528e-18	3.39916e-17	TRUE	CG13397	protein_coding	8.73276	225.24	385.121	290.907	376.51	242.079	315.15	91.665	103.073	81.5086	83.2941	123.898	57.4406	294	483	382	464	288	422	96	102	83	99	67	51
FBgn0284414	1.36583	1.74484	0.756467	0.0166095	0.0295737	TRUE	lncRNA:CR46328	ncRNA	2.39524	0.763051	3.16311	3.03077	1.62467	0	2.95042	0	0	0.978999	0	0	0	1	4	4	2	0	4	0	0	1	0	0	0
FBgn0036781	351.186	1.74471	0.278988	4.09684e-10	2.57938e-09	TRUE	CG13699	protein_coding	6.25029	780.567	851.852	727.424	681.483	482.788	572.654	140.606	205.946	220.685	177.756	96.5503	332.713	1019	1073	959	843	575	768	146	206	227	207	52	296
FBgn0040764	5.43516	1.74452	0.529248	0.00139874	0.00328919	TRUE	CG13230	protein_coding	3.19491	7.12456	5.38934	6.39395	7.52611	2.87615	2.85247	2.61486	0	0	2.77537	0	1.20641	10	7	8	9	3	4	3	0	0	3	0	1
FBgn0042207	16.0839	1.74412	0.355905	1.12875e-06	4.55964e-06	TRUE	CG18530	protein_coding	4.86775	21.3999	30.8906	30.322	30.8078	18.7072	31.1177	9.53506	6.04636	5.85724	4.32048	20.4325	3.38192	28	39	40	38	22	42	10	6	6	5	11	3
FBgn0032473	311.043	1.74309	0.226105	1.29765e-14	1.25689e-13	TRUE	kmg	protein_coding	7.70606	447.111	647.464	550.608	635.036	699.006	483.183	181.582	80.1318	190.737	292.404	139.27	121.481	584	816	726	785	830	649	189	80	196	340	75	108
FBgn0285912	46.421	1.74165	0.574227	0.00303872	0.00662913	TRUE	mah	protein_coding	2.96379	129.283	114.165	62.9345	127.137	82.0577	144.85	57.442	83.3713	6.82201	7.75721	5.57161	3.37794	169	144	83	157	97	195	60	83	7	9	3	3
FBgn0262722	4.02762	1.74159	0.731831	0.00619052	0.0124375	TRUE	lncRNA:CR43166	ncRNA	2.73752	0	2.99064	1.78232	2.62311	1.01465	1.44257	0	0	0	0	0	0	0	4	2	3	1	2	0	0	0	0	0	0
FBgn0035861	53.2362	1.73494	0.287103	1.6358e-09	9.7049e-09	TRUE	CG7213	protein_coding	6.03037	79.5639	93.5581	103.123	85.8307	85.4113	95.0982	23.9408	7.02975	38.004	49.9822	11.1431	22.5178	104	118	136	106	101	128	25	7	39	58	6	20
FBgn0036996	3.86641	1.73098	0.55559	0.00255611	0.00566481	TRUE	mag	protein_coding	3.01662	3.05937	3.9633	9.85669	10.5298	6.77484	8.9091	2.8697	0	1.94982	1.72473	3.71453	1.12626	4	5	13	13	8	12	3	0	2	2	2	1
FBgn0039288	1.60826	1.7305	0.725577	0.0309562	0.0512267	FALSE	CG13653	protein_coding	2.15764	3.81696	5.53797	8.33579	2.43567	1.71156	2.21558	0.948773	1.01176	2.93462	0	0	0	5	7	11	3	2	3	1	1	3	0	0	0
FBgn0267039	8.08691	1.73016	0.549146	0.00178161	0.00409287	TRUE	lncRNA:CR45483	ncRNA	3.12441	7.6195	8.68599	16.6624	2.44118	13.8336	15.4298	2.82385	1.01825	6.87006	1.74229	1.85838	1.13159	10	11	22	3	16	21	3	1	7	2	1	1
FBgn0003495	1101.68	1.72807	0.140582	1.01148e-34	5.23594e-33	TRUE	spz	protein_coding	12.2911	2064.14	2733.16	1946.62	2182.26	1546.16	1985.76	547.1	703.48	538.965	474.144	847.437	627.386	2722	3474	2601	2704	1859	2693	566	697	566	559	446	566
FBgn0053774	125.494	1.72539	0.150624	2.48467e-30	9.13277e-29	TRUE	CG33774	protein_coding	11.4452	176.643	140.587	139.443	193.616	150.425	171.895	57.2728	35.9491	47.9208	63.2332	36.0384	44.9624	250	183	173	231	156	241	66	34	47	68	20	37
FBgn0051769	852.595	1.72434	0.200869	9.19476e-18	1.20286e-16	TRUE	CG31769	protein_coding	8.5836	1148.28	1581.93	1777.43	1512.74	1269.69	1493.53	359.827	515.635	392.705	251.714	672.459	424.072	1503	1998	2345	1865	1490	2018	378	511	402	291	362	376
FBgn0034629	156.923	1.72366	0.19427	7.64258e-19	1.08418e-17	TRUE	Acox57D-d	protein_coding	8.86511	192.151	372.104	326.869	406.948	268.769	302.947	91.2405	87.1668	109.981	87.7398	103.99	77.6203	251	469	431	503	319	407	95	87	113	102	56	69
FBgn0031689	574.901	1.72233	0.380169	5.7805e-06	2.10106e-05	TRUE	Cyp28d1	protein_coding	4.53426	804.046	826.157	692.289	834.027	575.081	924.208	187.687	166.712	90.6267	69.8048	670.444	129.479	1051	1042	913	1030	680	1244	196	166	93	81	361	115
FBgn0033202	1.44101	1.72192	0.791596	0.0251983	0.0427343	TRUE	CG1339	protein_coding	2.23835	3.82373	1.58512	0	5.67079	3.38981	0	0	0	0.975135	0	0	0	5	2	0	7	4	0	0	0	1	0	0	0
FBgn0046253	46.0934	1.71565	0.39558	1.4364e-05	4.87734e-05	TRUE	CG3502	protein_coding	4.33822	22.9766	80.964	73.5735	86.5172	68.913	69.3126	11.5482	9.00286	14.5871	13.7459	50.1335	17.9883	30	102	97	107	82	93	12	9	15	16	27	16
FBgn0031074	23.0945	1.71273	0.35424	1.49049e-06	5.90792e-06	TRUE	SkpE	protein_coding	4.81251	31.9933	33.9458	42.4102	47.2099	40.6898	38.9165	6.58233	4.07632	9.81854	27.8947	11.1507	6.79156	42	43	56	58	47	53	7	4	10	32	6	6
FBgn0260026	127.563	1.71173	0.220599	8.95717e-15	8.81784e-14	TRUE	CG42494	protein_coding	7.75325	162.725	207.467	233.18	277.179	222.145	239.943	80.8087	33.7436	67.5857	96.4611	76.4253	44.5806	213	255	310	327	263	327	87	31	68	123	39	40
FBgn0033978	233.427	1.71038	0.391703	1.22228e-05	4.20786e-05	TRUE	Cyp6a23	protein_coding	4.37358	208.895	321.966	337.444	314.906	247.512	267.608	78.5921	37.1323	38.9648	24.9779	248.854	56.2807	273	406	445	389	293	360	82	37	40	29	134	50
FBgn0030326	717.085	1.7098	0.215476	2.11926e-15	2.21757e-14	TRUE	CG2444	protein_coding	7.93416	807.693	1159.36	1051.6	874.239	1672.02	1243.81	310.232	483.891	341.166	350.496	195.525	349.881	1066	1472	1388	1074	1931	1700	331	472	347	400	105	308
FBgn0035761	114.57	1.7076	0.331397	2.66893e-07	1.19006e-06	TRUE	RhoGEF4	protein_coding	5.14544	125.757	328.372	247.007	325.465	139.702	164.671	54.2606	150.165	42.2988	48.433	49.7464	40.1155	162	429	340	416	173	231	59	152	42	57	25	35
FBgn0052269	3.25775	1.70713	0.76569	0.0425245	0.0675184	FALSE	CG32269	protein_coding	2.02835	3.05065	9.255	13.2536	4.65399	8.6216	7.73323	0	1.50469	0	0	10.5667	0	4	12	14	7	8	9	0	2	0	0	4	0
FBgn0035665	40.6462	1.70711	0.799299	0.00322461	0.00698107	TRUE	Jon65Aiii	protein_coding	2.94547	0	8.69876	62.8888	46.3017	9.43592	40.5709	1.89406	0	0.978959	0.86781	1.85799	2.25909	0	11	83	57	11	55	2	0	1	1	1	2
FBgn0024291	3058.77	1.70628	0.153699	1.24095e-28	3.94303e-27	TRUE	Sirt1	protein_coding	11.101	3859.98	6979.24	6474.78	6634.45	4390.12	5703.63	1734.55	2336.29	1455.32	1387.65	1747.19	1659.04	5039	8791	8536	8207	5229	7649	1801	2337	1497	1616	941	1476
FBgn0267738	19.4952	1.7062	0.479096	0.00038326	0.00101862	TRUE	asRNA:CR46069	ncRNA	3.55135	14.5344	23.7838	34.8791	16.1963	29.6128	20.0547	4.78628	0	11.6954	17.2395	0	1.12602	19	30	46	20	35	27	5	0	12	20	0	1
FBgn0014464	3.87061	1.70533	0.634176	0.00781719	0.0152872	TRUE	Cp7Fa	protein_coding	2.65987	4.72413	8.15968	3.9064	7.52735	6.15704	7.62415	0	0	1.00743	0	9.57483	0.974378	6	10	5	9	7	10	0	0	1	0	5	1
FBgn0266810	1.21115	1.70486	0.791844	0.030708	0.0508806	FALSE	asRNA:CR45272	ncRNA	2.16084	0	3.96927	1.51702	1.61691	0	5.96425	0	0	0	0.858853	0	0	0	5	2	2	0	8	0	0	0	1	0	0
FBgn0053474	21.2879	1.70352	0.348322	1.10948e-06	4.4876e-06	TRUE	CG33474	protein_coding	4.87115	37.4857	36.6219	22.6721	42.4937	28.666	49.1066	6.39462	14.3153	6.36616	12.254	28.6603	3.35461	47	48	29	51	38	57	9	10	7	10	12	4
FBgn0267052	2.22939	1.70316	0.754488	0.0148611	0.0267994	TRUE	CR45496	pseudogene	2.43575	0	5.51812	0.757146	3.26141	0	2.92601	0	0	0	0.874984	0	0	0	7	1	4	0	4	0	0	0	1	0	0
FBgn0052529	4142.47	1.70105	0.237993	8.93268e-13	7.28834e-12	TRUE	Hers	protein_coding	7.14602	4395.81	10951.7	8473.57	12399.4	6451.58	7512.26	2546.41	4390.39	1801.15	1884.96	1846.15	2558.46	5414	11947	9716	13050	6697	8640	2795	4181	2019	2291	1102	2475
FBgn0264264	16.4753	1.70092	0.368082	4.36683e-06	1.62e-05	TRUE	lncRNA:CR43764	ncRNA	4.59311	22.9591	31.7259	38.675	21.8528	21.1001	25.2854	4.79554	2.00603	5.84303	12.0531	12.9994	10.1285	30	40	51	27	25	34	5	2	6	14	7	9
FBgn0039677	17.6161	1.70069	0.372343	5.61291e-06	2.04585e-05	TRUE	ppk30	protein_coding	4.54047	24.5408	19.0752	18.24	43.8125	24.5528	40.2313	7.68473	4.02331	11.7157	12.9486	5.58386	5.6407	32	24	24	54	29	54	8	4	12	15	3	5
FBgn0262035	357.821	1.70019	0.209067	4.28641e-16	4.74907e-15	TRUE	CG42846	protein_coding	8.13018	273.98	786.279	711.008	628.221	732.917	630.963	175.55	176.968	226.984	159.906	241.618	156.874	361	999	939	769	833	866	189	172	230	182	130	138
FBgn0016054	185.129	1.6967	0.190658	5.69768e-19	8.19267e-18	TRUE	phr6-4	protein_coding	8.89778	254.484	194.831	257.147	226.09	213.706	188.808	86.0522	34.6789	58.0945	54.7145	78.8706	95.5266	335	246	339	276	255	251	91	35	61	65	43	84
FBgn0032040	107.899	1.69668	0.504596	0.000910219	0.00223102	TRUE	CG13386	protein_coding	3.3169	348.972	278.559	338.763	172.062	176.875	195.86	68.393	100.068	96.796	73.6227	0	69.9698	457	352	447	212	207	265	72	99	99	85	0	62
FBgn0030494	43.9082	1.69654	0.503024	0.000802134	0.00199233	TRUE	Cpr12A	protein_coding	3.35206	39.6743	141.533	112.892	108.867	76.4017	62.6774	14.1973	90.223	11.7503	15.6262	0	12.4271	52	179	149	134	89	85	15	89	12	18	0	11
FBgn0042146	17.3465	1.69637	0.318758	1.25341e-07	5.85788e-07	TRUE	CG18823	protein_coding	5.28553	31.9683	26.8216	41.6466	25.2546	27.8112	24.185	5.62526	6.12896	3.93225	17.4672	13.0101	6.79803	42	34	55	31	32	33	6	6	4	20	7	6
FBgn0267173	15.6246	1.69498	0.340136	7.6325e-07	3.17675e-06	TRUE	lncRNA:CR45613	ncRNA	4.94454	29.8241	37.2489	28.0524	38.077	23.7333	11.1313	10.5148	11.0628	4.87598	9.49019	3.71464	7.88541	39	47	37	47	28	15	11	11	5	11	2	7
FBgn0035144	572.569	1.69414	0.259343	6.50124e-11	4.44593e-10	TRUE	Kah	protein_coding	6.53173	749.705	1166.68	855.546	1270.48	678.707	947.662	315.467	427.335	143.961	167.589	430.788	215.897	979	1470	1128	1571	807	1272	328	427	148	195	232	192
FBgn0023495	6.10167	1.69257	0.573351	0.00390721	0.00828671	TRUE	Lip3	protein_coding	2.88556	12.2364	10.3037	15.922	17.0115	13.5562	6.6802	1.91241	0	1.95013	2.5877	14.8584	1.12638	16	13	21	21	16	9	2	0	2	3	8	1
FBgn0267151	0.59153	1.68738	0.804638	0.0521666	0.0810254	FALSE	lncRNA:CR45591	ncRNA	1.94176	0.728525	1.54909	2.34471	0.831198	3.76659	1.42743	0	0	0	0	0	0	1	2	3	1	4	2	0	0	0	0	0	0
FBgn0038469	2.36533	1.68551	0.60043	0.00798789	0.015584	TRUE	CG4009	protein_coding	2.65258	4.67151	4.03458	6.94253	5.7615	3.43051	4.24569	0.976355	0	1.98046	2.62584	1.88889	0	6	5	9	7	4	6	1	0	2	3	1	0
FBgn0260396	9.17465	1.68364	0.464879	0.000347914	0.000934365	TRUE	CG42521	protein_coding	3.57673	25.6038	16.4558	22.7853	10.6762	7.19707	13.7153	5.48144	3.12208	3.97547	8.88322	1.85581	2.29256	34	21	30	13	8	19	6	3	4	10	1	2
FBgn0001226	8563.49	1.68169	0.378148	9.17189e-06	3.22865e-05	TRUE	Hsp27	protein_coding	4.43583	9893.64	26894.4	21209.9	23949.1	14818.3	18048	5294.56	16613.5	3036.85	3540.2	1645.55	3260.22	12963	33948	27936	29521	17446	24328	5563	16500	3129	4103	883	2906
FBgn0267473	47.5242	1.68135	0.212039	2.55253e-15	2.64965e-14	TRUE	lncRNA:CR45823	ncRNA	7.91104	74.7784	69.5879	56.069	82.8588	88.3696	89.2484	23.6726	23.3078	23.4963	31.2437	26.012	12.4255	98	88	74	102	103	121	25	23	24	36	14	11
FBgn0051002	2.33884	1.68128	0.659753	0.0154227	0.0276951	TRUE	Ugt35D1	protein_coding	2.4223	2.29525	6.3433	4.54963	7.28697	2.53614	5.20154	2.87364	0	0	0	1.85716	2.25161	3	8	6	9	3	7	3	0	0	0	1	2
FBgn0030815	40.6573	1.68098	0.446206	0.000185245	0.000526629	TRUE	CG8945	protein_coding	3.73833	88.1019	120.687	80.406	144.682	44.4705	64.893	44.324	57.9602	12.6355	15.4519	3.71339	17.9817	115	152	106	179	53	87	46	58	13	18	2	16
FBgn0085456	5.10204	1.68022	0.533981	0.00204844	0.00464846	TRUE	CG34427	protein_coding	3.08312	3.81505	7.11661	12.8806	9.74866	6.86544	8.11245	4.73358	0	2.93728	1.73598	1.85801	1.12966	5	9	17	12	8	11	5	0	3	2	1	1
FBgn0264825	7.21824	1.6788	0.518752	0.00137503	0.00323976	TRUE	lncRNA:CR44033	ncRNA	3.19984	11.451	5.53804	7.57802	16.2375	8.55719	11.0783	1.89765	0	1.95637	6.06738	3.7157	2.25784	15	7	10	20	10	15	2	0	2	7	2	2
FBgn0263200	1874.67	1.67796	0.254867	4.59908e-11	3.19119e-10	TRUE	Galt	protein_coding	6.58337	4093.76	3469.11	2538.83	3406.22	2255.38	3081.93	851.563	944.411	602.862	569.48	1983.06	770.24	5342	4375	3352	4207	2662	4144	887	937	616	660	1066	685
FBgn0262951	16.6406	1.67613	0.45518	0.000260351	0.000719536	TRUE	lncRNA:CR43270	ncRNA	3.65186	9.19171	21.4342	55.3715	51.7409	20.9964	40.2592	13.4799	14.9986	5.8336	8.58841	11.1405	2.24821	12	27	73	64	25	54	14	15	6	10	6	2
FBgn0038470	125.903	1.67487	0.204783	3.03693e-16	3.42542e-15	TRUE	CG18213	protein_coding	8.17185	139.356	289.568	266.893	293.396	204.205	181.029	61.5443	103.072	58.3274	73.0162	72.3815	53.9676	182	365	352	363	243	243	64	103	60	85	39	48
FBgn0037127	620.98	1.67311	0.341786			FALSE	CG14566	protein_coding	4.89034	873.516	1389.2	1440.39	1361.94	1296.42	1231.96	246.42	1053.03	243.5	183.075	310.283	214.029	1147	1760	1902	1673	1497	1678	262	1033	248	210	167	189
FBgn0038431	36.0466	1.67293	0.261583	1.83699e-10	1.20511e-09	TRUE	CG10405	protein_coding	6.37438	48.8547	64.0789	94.7222	66.5792	65.9137	59.8123	12.3314	34.406	11.7396	24.2737	16.7208	21.4512	64	81	125	82	77	81	13	34	12	28	9	19
FBgn0041184	2325.84	1.66782	0.146393	4.58137e-30	1.62037e-28	TRUE	Socs36E	protein_coding	11.392	2735.59	5391.32	4790.95	5396.26	3714	4528.66	1437.39	1747.23	1193.39	1163.89	1271.04	1463.88	3579	6787	6257	6646	4387	6068	1495	1751	1230	1358	686	1305
FBgn0003980	4.35674	1.66777	0.545585	0.00291966	0.00639257	TRUE	Vm26Ab	protein_coding	2.97607	6.8552	8.68489	6.06702	14.7021	5.24555	7.3254	0	4.10318	1.972	2.62981	3.72339	1.13607	9	11	8	18	6	10	0	4	2	3	2	1
FBgn0040104	0.670376	1.66706	0.804386	0.0524428	0.0814022	FALSE	lectin-24A	protein_coding	1.93948	0.763571	0.791315	6.82062	0.811668	0.854731	0.738979	0	0	0	0	0	0	1	1	9	1	1	1	0	0	0	0	0	0
FBgn0035743	14.7134	1.66663	0.501236	0.000937804	0.00229002	TRUE	Acbp6	protein_coding	3.30855	13.9052	46.6664	16.0359	29.1813	25.3033	34.9232	10.2665	8.80778	1.4147	12.7852	10.5618	3.80522	20	49	16	29	23	46	11	8	3	13	5	7
FBgn0266815	1.13314	1.66565	0.793372	0.0295575	0.0492037	TRUE	lncRNA:CR45277	ncRNA	2.17597	1.5077	0.784021	0	1.64156	3.58983	2.16757	0	0	0	0	0	0	2	1	0	2	4	3	0	0	0	0	0	0
FBgn0037750	246.198	1.66517	0.26706	4.56235e-10	2.86209e-09	TRUE	Whamy	protein_coding	6.23346	197.482	431.464	586.447	467.312	386.521	449.42	126.75	120.93	82.6432	80.7976	236.995	126.468	259	552	771	597	464	599	132	116	83	95	128	113
FBgn0030773	2.62277	1.66411	0.739397	0.0242403	0.0412699	TRUE	CG9676	protein_coding	2.2533	2.29058	6.33015	10.6097	0.811725	3.42001	5.17203	0	1.01119	0	0	5.57341	0	3	8	14	1	4	7	0	1	0	0	3	0
FBgn0017448	39.2838	1.66188	0.447393	0.000182209	0.000518752	TRUE	CG2187	protein_coding	3.74249	10.8481	33.3847	18.9998	30.038	11.7387	25.8332	6.22736	14.0965	1.05303	1.86167	9.98772	3.65092	15	46	26	41	16	33	6	13	1	2	6	3
FBgn0263492	455.796	1.66106	0.376253	1.07872e-05	3.74749e-05	TRUE	asRNA:CR43481	ncRNA	4.40076	444.093	1365.94	1228.9	1435.98	658.326	1022.69	272.348	718.214	248.265	306.042	70.7743	202.504	556	1756	1646	1787	821	1413	297	721	207	333	40	189
FBgn0052793	5.33399	1.66057	0.476691	0.000662473	0.00167309	TRUE	CG32793	protein_coding	3.40466	9.9546	7.93607	11.3768	11.3229	8.41324	6.70396	1.92304	3.00303	0	5.15749	0	4.49823	13	10	15	14	10	9	2	3	0	6	0	4
FBgn0033782	1070.79	1.66045	0.155194	1.04036e-26	2.80414e-25	TRUE	sug	protein_coding	10.698	2475.13	2104.27	1458.75	2588.32	1573.12	2019.42	615.269	780.813	617.98	508.747	672.947	630.356	3238	2656	1923	3199	1856	2723	644	777	633	590	362	559
FBgn0266986	1.79773	1.66016	0.747819	0.0428697	0.0679766	FALSE	lncRNA:CR45437	ncRNA	2.02498	0	5.967	2.40013	10.8449	1.77682	4.87364	0.864593	0.936499	1.10741	0	0	2.55206	0	8	3	14	2	7	1	1	1	0	0	2
FBgn0010314	205.873	1.65943	0.197726	4.88858e-17	5.93808e-16	TRUE	Cks30A	protein_coding	8.38935	186.458	411.815	420.701	339.757	263.812	307.349	101.962	124.012	124.987	101.139	78.017	66.5231	244	520	555	419	310	415	107	123	128	117	42	59
FBgn0266229	16.8977	1.65841	0.32433	3.78544e-07	1.65532e-06	TRUE	lncRNA:CR44924	ncRNA	5.07944	25.9925	14.2611	22.7432	19.4511	21.2268	22.9849	4.77304	6.04077	12.6846	7.77124	5.57226	0	34	18	30	24	25	31	5	6	13	9	3	0
FBgn0041225	6.11777	1.65706	0.533762	0.00257702	0.00570632	TRUE	Gr94a	protein_coding	3.01415	2.29305	18.2192	9.09683	18.6448	16.9983	17.7859	4.76935	4.02968	6.83237	0.86389	1.85748	4.50873	3	23	12	23	20	24	5	4	7	1	1	4
FBgn0034782	0.846498	1.65549	0.786351	0.0643007	0.0972724	FALSE	CG12490	protein_coding	1.85009	0	1.58579	2.2748	8.09688	2.53648	0.743028	0	0	0	0	0	0	0	2	3	10	3	1	0	0	0	0	0	0
FBgn0265809	2.35602	1.65405	0.676691	0.0181047	0.0319088	TRUE	lncRNA:CR44598	ncRNA	2.36347	2.26606	3.92413	2.27486	6.55845	2.67889	2.89582	1.83719	0	0.991507	0	0	1.14267	3	5	3	8	3	4	2	0	1	0	0	1
FBgn0025679	4.35371	1.65259	0.567348	0.00454071	0.00944459	TRUE	Klf15	protein_coding	2.83793	11.457	4.74936	10.6108	7.30227	5.97306	7.39603	3.80367	4.0397	2.93192	0	0	1.1282	15	6	14	9	7	10	4	4	3	0	0	1
FBgn0038492	893.78	1.64983	0.512134	0.00148935	0.00348132	TRUE	Mur89F	protein_coding	3.17675	4254.54	1868.79	1190.98	1775.87	1285.82	2065.57	936.822	1842.77	202.057	247.88	40.8438	212.334	5552	2353	1570	2198	1535	2767	971	1846	208	289	22	189
FBgn0039671	2.81181	1.64854	0.699977	0.0235905	0.0402918	TRUE	CG11470	protein_coding	2.26373	3.86613	9.61604	3.8431	5.78105	1.75542	8.94686	0	1.03356	1.99225	2.65267	1.88604	0	5	12	5	7	2	12	0	1	2	3	1	0
FBgn0034783	14.708	1.64809	0.683965	0.00242673	0.00541648	TRUE	CG9825	protein_coding	3.03233	3.05974	1.58552	2.2747	1.61972	0.846283	0	0	0	0	0	0	0	4	2	3	2	1	0	0	0	0	0	0	0
FBgn0052679	5.50949	1.64712	0.719406	0.0299769	0.0498171	TRUE	CG32679	protein_coding	2.1704	3.05248	16.6079	17.4274	5.6857	23.1522	11.8046	1.89461	13.1695	1.95768	0	0	0	4	21	23	7	27	16	2	13	2	0	0	0
FBgn0052189	0.962466	1.64522	0.803039	0.039828	0.0637615	FALSE	CG32189	protein_coding	2.05553	0.750045	0	3.04598	1.64583	4.53534	0.719776	0	0	0	0	0	0	1	0	4	2	5	1	0	0	0	0	0	0
FBgn0034301	28.3687	1.64321	0.35072	3.17017e-06	1.20319e-05	TRUE	CG5756	protein_coding	4.65947	33.1239	94.8138	59.3362	48.0404	69.4941	41.0841	21.512	24.8986	12.7364	14.2559	13.159	17.694	46	140	101	66	92	68	21	24	12	17	7	16
FBgn0051683	25.1532	1.64293	0.694731	0.0183608	0.0323164	TRUE	CG31683	protein_coding	2.35826	13.6337	7.43674	93.4738	2.27594	147.065	15.3442	7.1261	25.5676	0	4.57175	13.8031	10.7556	19	10	117	3	186	22	7	24	0	5	7	9
FBgn0265953	1.65253	1.64206	0.738583	0.0370495	0.0599395	FALSE	lncRNA:CR44740	ncRNA	2.08522	2.25859	7.05169	6.07718	0.821356	0.90013	3.60852	1.82638	0	0	0.888613	0	1.14659	3	9	8	1	1	5	2	0	0	1	0	1
FBgn0265001	14.5721	1.6397	0.45975	0.000375739	0.0010005	TRUE	ppk18	protein_coding	3.55656	9.94605	33.3023	17.4403	26.7189	9.29926	21.5491	10.5366	3.01215	0	7.75465	11.143	2.25162	13	42	23	33	11	29	11	3	0	9	6	2
FBgn0034275	399.434	1.63939	0.204055	9.52229e-16	1.02805e-14	TRUE	CG5002	protein_coding	8.03286	435.502	817.027	693.136	667.638	551.665	771.426	180.393	188.5	190.837	194.516	345.407	148.531	569	1030	914	825	654	1037	188	188	196	226	186	132
FBgn0265733	1.85438	1.63868	0.756438	0.0406064	0.0648615	FALSE	lncRNA:CR44540	ncRNA	2.04753	4.57458	3.16056	6.0601	0	0.861677	8.09594	0	1.01611	1.96074	0	0	1.13071	6	4	8	0	1	11	0	1	2	0	0	1
FBgn0266971	17.0871	1.63852	0.338749	1.54175e-06	6.10027e-06	TRUE	lncRNA:CR45422	ncRNA	4.80575	26.3609	20.0176	35.966	25.087	27.8028	34.9428	6.97295	7.40205	7.11852	19.4276	5.42952	3.61922	37	26	45	30	29	49	8	7	7	21	3	3
FBgn0034674	982.7	1.63567	0.122139	6.88614e-41	5.49567e-39	TRUE	CG9304	protein_coding	13.3903	2207.72	2146.01	1711.84	1936.1	1461.01	1646.41	582.798	737.625	621.582	537.171	464.212	601.603	2883	2704	2257	2394	1737	2210	606	737	639	625	250	535
FBgn0267933	1.64732	1.6352	0.675425	0.0254718	0.0431327	TRUE	lncRNA:CR46213	ncRNA	2.23417	3.68649	3.10954	3.09049	1.65657	3.71976	6.43559	1.78339	0	0	0.904829	1.84045	1.16997	5	4	4	2	4	9	2	0	0	1	1	1
FBgn0267284	2.20743	1.63487	0.732693	0.0284803	0.0476439	TRUE	lncRNA:CR45720	ncRNA	2.19061	3.05047	3.9516	0	4.06442	4.30291	2.94584	0	0	1.95996	0.869169	0	0	4	5	0	5	5	4	0	0	2	1	0	0
FBgn0019928	13.103	1.63481	0.468163	0.000534572	0.00137988	TRUE	Ser8	protein_coding	3.46281	16.0198	21.3449	27.2744	29.2538	42.1002	13.2671	9.45852	1.01428	7.83576	4.34249	16.7228	5.6498	21	27	36	36	49	18	10	1	8	5	9	5
FBgn0263650	28.5027	1.63326	0.342269	2.15317e-06	8.34419e-06	TRUE	lncRNA:CR43641	ncRNA	4.73849	45.3735	58.1127	65.1804	87.6521	55.1901	68.14	18.4148	41.4152	13.8673	18.5563	3.71541	18.2602	60	74	86	107	62	94	20	40	14	21	2	16
FBgn0265745	21.954	1.63123	0.309539	1.53671e-07	7.08771e-07	TRUE	lncRNA:CR44552	ncRNA	5.24811	20.9699	22.6704	17.5333	33.7637	22.7387	24.4507	2.71874	7.31909	5.98432	10.721	11.1149	6.91584	28	29	23	41	25	34	3	7	6	12	6	6
FBgn0033304	415.771	1.63059	0.13592	3.75949e-33	1.74917e-31	TRUE	Cyp6a13	protein_coding	11.9953	767.361	569.299	517.897	523.056	483.613	592.941	158.993	173.712	203.648	150.793	221.003	204.902	1003	718	683	646	572	798	166	173	209	175	119	182
FBgn0042199	2.58266	1.63044	0.67939	0.0230338	0.0394529	TRUE	CG13713	protein_coding	2.27287	3.76567	7.83681	9.11341	7.39078	2.69812	2.88771	2.74125	0	3.97511	0.888231	0	0	5	10	12	9	3	4	3	0	4	1	0	0
FBgn0263096	4.6681	1.63039	0.69663	0.0199344	0.0347689	TRUE	CR43364	pseudogene	2.32758	0	5.25371	5.28722	8.67664	7.06513	12.963	4.99584	0	1.04347	0	1.71191	0	0	7	6	10	7	18	6	0	1	0	1	0
FBgn0065046	0.706189	1.62946	0.804546	0.0523892	0.0813468	FALSE	snoRNA:U3:9B	snoRNA	1.93992	0.623534	0.733482	4.63069	0	3.09297	1.45218	0	0	0	0	0	0	1	1	5	0	3	2	0	0	0	0	0	0
FBgn0038852	12.3665	1.62909	0.36524	1.01969e-05	3.55506e-05	TRUE	HHEX	protein_coding	4.41295	33.6366	23.7679	24.2593	28.367	11.8885	25.2076	13.3632	5.03437	8.78201	6.90819	5.57228	4.50784	44	30	32	35	14	34	14	5	9	8	3	4
FBgn0265303	1.15427	1.62878	0.79034	0.0371137	0.0600247	FALSE	lncRNA:CR44276	ncRNA	2.08451	0	3.12695	2.28695	0.823506	3.63819	2.15741	0	0	0	0	1.85248	0	0	4	3	1	4	3	0	0	0	0	1	0
FBgn0020506	5.23852	1.62866	0.495822	0.00136595	0.00322176	TRUE	Amyrel	protein_coding	3.20175	6.11955	7.1349	6.82411	12.1477	15.2322	17.0821	6.69984	1.00468	2.92403	4.31026	1.85722	1.12607	8	9	9	15	18	23	7	1	3	5	1	1
FBgn0011274	2073.36	1.6272	0.163529	2.52193e-23	5.18073e-22	TRUE	Dif	protein_coding	9.95	4156	4653.14	3112.81	4523.21	2310.11	3167.31	1035.42	1396.45	991.462	1054.23	1227.47	1310.14	5121	5646	3951	5320	2642	4072	1078	1374	997	1224	687	1162
FBgn0010258	432.142	1.627	0.211364	1.40501e-14	1.35499e-13	TRUE	Rbp4	protein_coding	7.6959	570.614	662.712	866.648	731.349	823.662	786.386	227.734	126.616	250.52	414.715	219.155	167.797	746	836	1143	903	973	1059	238	126	257	481	118	149
FBgn0265668	14.4445	1.62599	0.592378	0.00775511	0.0151867	TRUE	CG44475	protein_coding	2.66255	14.5418	17.8049	42.2834	19.1276	9.43234	98.4815	6.17653	25.3467	3.03077	6.39349	1.82835	11.8492	20	23	54	23	10	138	7	24	3	7	1	10
FBgn0050371	68.2215	1.62387	0.490527	0.000800461	0.00198939	TRUE	CG30371	protein_coding	3.35264	14.5245	78.432	12.8876	37.2835	45.0129	74.1348	11.4529	6.04178	3.9033	6.04509	42.721	6.76198	19	99	17	46	53	100	12	6	4	7	23	6
FBgn0037560	275.677	1.62153	0.276153	4.31823e-09	2.43093e-08	TRUE	CR18228	pseudogene	5.87152	252.992	557.426	404.357	588.404	385.306	418.963	109.06	127.844	99.3777	65.9561	301.356	123.241	330	696	537	722	446	570	115	125	101	77	162	110
FBgn0086708	7527.72	1.62099	0.233928	4.23545e-12	3.24891e-11	TRUE	stv	protein_coding	6.92909	5644.69	16213.5	14756.2	16410.5	11441.9	13412.5	3522.21	5356.85	3025.64	2680.98	6464.88	3658.31	7276	20263	19031	20025	13182	17658	3741	5229	3071	3207	3410	3331
FBgn0039543	952.124	1.62015	0.142944	8.98242e-30	3.0862e-28	TRUE	CROT	protein_coding	11.3332	1354.5	2175.62	1412.6	2137.01	1235.52	1427.49	496.104	531.252	486.175	452.966	615.974	564.365	1758	2708	1853	2612	1453	1897	517	542	500	531	329	509
FBgn0025682	4427.41	1.61991	0.109102	7.24135e-50	1.21725e-47	TRUE	scf	protein_coding	14.8473	5936.9	9257.8	8618.27	8493.88	6257.24	7792.29	2479.72	2800.99	2450.83	2411.25	2210.94	2645.92	7764	11682	11371	10494	7401	10494	2591	2790	2516	2799	1191	2351
FBgn0261833	4.24748	1.61599	0.730621	0.0139284	0.0252953	TRUE	lncRNA:CR42765	ncRNA	2.45911	2.14783	4.56316	2.29844	1.22336	0.382492	2.01202	0	0	0	0.382621	2.69596	0	2	4	2	1	1	3	0	0	0	1	1	0
FBgn0003086	1.1937	1.61561	0.793752	0.0515505	0.080168	FALSE	Pig1	protein_coding	1.94687	3.04584	0	5.30094	0.814293	4.33673	2.20081	0	0	1.96487	0	0	0	4	0	7	1	5	3	0	0	2	0	0	0
FBgn0032132	788.788	1.61378	0.432272	0.000211426	0.000594678	TRUE	CG4382	protein_coding	3.70496	2473.26	2095.32	1459.76	1501.53	1465.03	1850.6	954.919	1330.39	315.572	285.035	76.1408	289.255	3232	2642	1925	1855	1735	2489	996	1326	324	331	41	257
FBgn0264987	20.2182	1.61368	0.343252	3.00347e-06	1.14242e-05	TRUE	lncRNA:CR44138	ncRNA	4.67058	20.4066	54.9551	26.5327	47.53	40.1185	50.7085	11.956	18.6512	19.8204	9.72752	7.43001	5.70972	27	70	35	58	45	70	13	18	20	11	4	5
FBgn0267925	6.89833	1.61242	0.519072	0.00222916	0.00501996	TRUE	lncRNA:CR46206	ncRNA	3.05787	6.11092	12.666	9.09518	15.4144	13.6466	18.4942	1.9025	1.00964	7.81732	6.05766	0	3.38425	8	16	12	19	16	25	2	1	8	7	0	3
FBgn0266974	2.61453	1.61082	0.662373	0.0206025	0.0358183	TRUE	lncRNA:CR45425	ncRNA	2.31519	4.56069	5.51582	3.02848	8.97373	2.62345	8.76825	0.933151	0	4.92485	0	0	2.26963	6	7	4	11	3	12	1	0	5	0	0	2
FBgn0030667	190.646	1.607	0.205071	4.78554e-15	4.84536e-14	TRUE	CG15599	protein_coding	7.83242	331.678	323.905	354.229	320.133	348.476	339.999	104.966	55.9883	116.665	170.894	135.542	67.4432	433	408	467	396	415	456	109	56	120	199	73	60
FBgn0041180	2684.29	1.60499	0.154957	3.90255e-25	9.10575e-24	TRUE	Tep4	protein_coding	10.3567	4349.49	7387.51	5381.47	6204.71	4541.86	5188.63	1754.15	2245.62	1623.39	1496.23	1904.87	1731.65	5677	9306	7097	7682	5418	6956	1819	2247	1671	1743	1026	1540
FBgn0266955	10.6278	1.60441	0.331568	1.7328e-06	6.80454e-06	TRUE	lncRNA:CR45406	ncRNA	4.78232	19.7931	11.835	18.9308	21.992	22.5782	16.8629	8.44316	3.06296	4.91402	6.98406	5.57564	5.66384	26	15	25	27	26	23	9	3	5	8	3	5
FBgn0286833	2.29581	1.60297	0.737743	0.0362783	0.0588943	FALSE	CG46387	protein_coding	2.09379	3.8112	8.68934	3.78727	8.13353	1.72565	0	0	3.05085	0	0.870277	0	1.13104	5	11	5	10	2	0	0	3	0	1	0	1
FBgn0035667	9.36759	1.60279	0.670748	0.0216949	0.0374593	TRUE	Jon65Ai	protein_coding	2.29567	4.70802	8.945	24.9348	40.1052	22.9521	28.8184	0.973465	21.8926	4.37236	5.35659	0	0	6	11	32	48	26	38	1	21	5	6	0	0
FBgn0266534	10.5136	1.60276	0.367345	1.66102e-05	5.58425e-05	TRUE	CG45095	protein_coding	4.30617	23.6815	26.1256	9.85331	18.6578	24.7245	25.8971	7.61239	8.07511	7.8163	3.46084	3.7153	9.02384	31	33	13	23	29	35	8	8	8	4	2	8
FBgn0015336	63.8945	1.60232	0.440627	0.00028315	0.000776713	TRUE	CG15865	protein_coding	3.63025	39.0634	132.57	125.154	133.401	111.723	140.893	29.8435	44.0015	38.8932	9.44819	48.276	34.8488	51	167	165	165	133	189	31	44	40	11	26	31
FBgn0036923	37.3185	1.60102	0.252876	2.70962e-10	1.74607e-09	TRUE	CG17732	protein_coding	6.31454	35.9834	90.4551	65.9821	54.2001	69.8983	49.8825	19.2155	23.0374	15.5702	24.94	14.8554	17.997	47	114	87	67	83	67	20	23	16	29	8	16
FBgn0011774	185.038	1.59872	0.18448	4.64289e-18	6.24632e-17	TRUE	Irbp	protein_coding	8.66182	194.146	376.388	319.167	443.711	309.225	308.933	108.715	136.359	86.0405	101.366	134.63	70.8109	255	474	422	548	365	418	112	137	89	118	73	62
FBgn0038734	68.5386	1.59833	0.43005	0.000186073	0.000528695	TRUE	CG11453	protein_coding	3.73721	42.0887	80.8951	72.0402	80.9439	37.1514	69.8922	17.2584	8.0262	11.6876	4.30554	68.7123	10.1294	55	102	95	100	44	94	18	8	12	5	37	9
FBgn0265895	10.3408	1.59665	0.436934	0.000294562	0.00080477	TRUE	lncRNA:CR44684	ncRNA	3.62004	11.411	15.77	21.9576	20.3783	9.5848	20.4951	7.48569	0	6.88703	9.61879	3.71728	1.13373	15	20	29	25	11	28	8	0	7	11	2	1
FBgn0038833	5.24308	1.59614	0.696406	0.0131098	0.0239786	TRUE	CG15696	protein_coding	2.48077	0.761346	3.15622	0.757241	1.62886	2.60403	5.86662	0	0	1.96535	0	0	0	1	4	1	2	3	8	0	0	2	0	0	0
FBgn0267137	2.59062	1.59558	0.695649	0.0232087	0.0397134	TRUE	lncRNA:CR45577	ncRNA	2.26998	1.52326	0	4.54383	4.8846	2.59927	7.33997	0	0	0.982096	1.74408	1.85847	0	2	0	6	6	3	10	0	0	1	2	1	0
FBgn0039023	405.351	1.59264	0.231837	6.4972e-12	4.88086e-11	TRUE	Nepl14	protein_coding	6.8683	753.304	733.112	723.514	682.819	449.036	754.049	190.176	257.48	194.652	159.99	259.973	266.604	984	924	954	844	533	1013	198	257	200	186	140	237
FBgn0266311	5.52627	1.59117	0.594423	0.0089504	0.0171873	TRUE	asRNA:CR44976	ncRNA	2.61394	7.61859	11.0538	12.1176	16.2764	5.19055	15.4254	0.94087	1.01861	0.981627	2.61419	1.85839	11.3175	10	14	16	20	6	21	1	1	1	3	1	10
FBgn0286939	11.3452	1.58988	0.390201	5.30301e-05	0.00016439	TRUE	CG46433	protein_coding	4.04185	17.2456	26.5975	24.9863	22.1973	13.4393	21.6947	4.94571	15.7463	5.48283	5.07455	2.01697	5.03806	27	24	29	23	13	23	6	19	4	6	2	5
FBgn0035084	100.104	1.58814	0.218651	4.06556e-13	3.45418e-12	TRUE	CG15861	protein_coding	7.25336	127.426	194.479	173.791	264.946	173.584	194.486	51.1147	82.7536	62.2887	45.6175	61.3228	65.7726	166	280	267	354	237	272	47	71	57	47	28	54
FBgn0259683	17.7873	1.58685	0.375564	2.5732e-05	8.40159e-05	TRUE	Ir40a	protein_coding	4.20828	38.1275	34.9329	23.9459	27.5158	25.9072	22.9964	5.7605	1.87681	11.1692	9.18035	10.9292	18.2267	44	44	31	36	35	33	5	3	12	12	5	12
FBgn0264889	3.92022	1.58674	0.74049	0.0343538	0.0561427	FALSE	lncRNA:CR44080	ncRNA	2.11589	2.29205	3.95892	0.757974	4.05542	28.1154	2.9607	1.90412	0	2.93046	0	0	3.38341	3	5	1	5	33	4	2	0	3	0	0	3
FBgn0261445	2518.39	1.58528	0.152906	3.50181e-25	8.23214e-24	TRUE	sgl	protein_coding	10.367	3463.37	6187.03	4260.7	6069.31	3751.47	4324.83	1399.44	1852.44	1279.83	1230.88	1821.67	1678.36	4524	7798	5618	7502	4453	5810	1457	1849	1315	1431	981	1492
FBgn0067903	355.765	1.58438	0.393387	5.67242e-05	0.000174802	TRUE	IM18	protein_coding	4.02604	346.144	253.848	400.247	333.273	1940.26	456.734	216.859	78.682	169.916	312.052	206.453	167.38	399	345	471	413	827	452	243	109	321	430	113	174
FBgn0033170	175.879	1.58384	0.268023	3.46369e-09	1.96758e-08	TRUE	sPLA2	protein_coding	5.90796	285.581	310.832	221.944	322.561	241.197	286.696	84.7486	84.6968	76.2293	68.1511	151.736	78.7635	369	389	288	390	274	385	92	86	82	81	80	69
FBgn0038851	35.7417	1.58336	0.400051	8.18283e-05	0.000246051	TRUE	dmrt93B	protein_coding	3.93898	37.4158	79.1333	82.6059	92.5275	70.0792	74.6416	19.9451	3.03273	39.1118	47.6425	11.1467	12.4145	49	100	109	114	82	101	21	3	40	55	6	11
FBgn0034085	153.007	1.58199	0.257355	7.95164e-10	4.85958e-09	TRUE	Ptp52F	protein_coding	6.14589	160.122	312.052	214.671	280.458	187.911	253.632	70.352	74.9386	62.2014	40.3425	146.678	69.6757	209	393	283	347	224	340	73	75	64	47	79	62
FBgn0263442	109.432	1.58145	0.239981	4.59855e-11	3.19119e-10	TRUE	asRNA:CR43465	ncRNA	6.58339	95.5284	242.355	263.796	235.133	185.445	183.706	65.7714	74.5904	72.2486	75.1911	65.0134	39.4593	125	306	348	290	218	248	69	74	74	87	35	35
FBgn0085205	31.5725	1.58098	0.582479	0.00598636	0.0120801	TRUE	CG34176	protein_coding	2.74853	2.98135	24.9699	52.8001	39.6071	32.0843	50.2219	15.3186	5.24326	1.99989	0	27.7359	5.79042	4	32	69	48	35	70	17	5	2	0	15	5
FBgn0053687	0.754923	1.58064	0.8001	0.0483835	0.0756606	FALSE	CG33687	protein_coding	1.97398	0.762505	1.58041	0.757529	3.25214	0.861279	1.47232	0	0	0	0	0	0	1	2	1	4	1	2	0	0	0	0	0	0
FBgn0004783	63.808	1.57653	0.398155	7.37383e-05	0.000223142	TRUE	Ccp84Aa	protein_coding	3.96389	12.1965	99.5356	107.559	49.6123	112.146	32.3656	16.0298	9.15145	26.48	34.8078	20.4409	20.3578	16	126	142	61	130	44	17	9	27	40	11	18
FBgn0262101	38.8604	1.57612	0.24138	7.39586e-11	5.02475e-10	TRUE	CG42854	protein_coding	6.5124	56.5984	53.1083	71.2714	63.1787	82.1449	70.5304	30.6102	14.072	22.4229	31.9074	16.7154	11.2626	74	67	94	78	97	95	32	14	23	37	9	10
FBgn0265888	1.38564	1.57584	0.800448	0.0733884	0.109278	FALSE	lncRNA:CR44677	ncRNA	1.79041	0	4.75384	1.51623	5.67302	3.39572	4.44907	0	0	0	2.5902	0	0	0	6	2	7	4	6	0	0	0	3	0	0
FBgn0266443	2.26721	1.57492	0.67089	0.0292834	0.0487889	TRUE	CG45073	protein_coding	2.17965	1.52536	7.1135	1.51516	10.5664	6.02122	5.15643	0.945023	0	0.979833	1.73794	1.85812	3.39076	2	9	2	13	7	7	1	0	1	2	1	3
FBgn0267073	26.0379	1.57291	0.355851	1.04963e-05	3.65292e-05	TRUE	lncRNA:CR45517	ncRNA	4.40669	31.2565	68.7337	17.422	71.5629	27.5897	42.6753	16.0366	15.2474	7.8445	6.08969	16.7244	21.4864	41	87	23	88	32	58	17	15	8	7	9	19
FBgn0266204	5.86023	1.57253	0.536029	0.00373269	0.00795761	TRUE	lncRNA:CR44899	ncRNA	2.89991	1.52187	11.8303	1.51438	7.33418	6.9621	6.59152	1.87319	2.04463	1.96694	0.873923	1.85859	1.13338	2	15	2	9	8	9	2	2	2	1	1	1
FBgn0038930	74.3468	1.57164	0.436707	0.000318614	0.000862643	TRUE	CG5778	protein_coding	3.59968	47.0316	155.686	100.339	109.445	96.2752	185.895	24.4919	24.111	18.7326	10.0429	121.709	17.6534	56	210	147	149	97	256	29	16	20	12	72	13
FBgn0053057	156.571	1.57049	0.210598	9.09664e-14	8.21061e-13	TRUE	CG33057	protein_coding	7.4534	200.401	299.854	254.735	371.665	225.524	252.942	89.5361	86.3015	49.4275	102.811	115.244	90.0369	262	378	336	460	268	339	93	86	51	120	62	80
FBgn0263113	351.679	1.56881	0.193452	5.18248e-16	5.70146e-15	TRUE	Cc2d2a	protein_coding	8.10714	490.298	732.843	706.963	649.061	631.88	568.345	207.15	110.931	250.775	332.233	183.813	165.211	640	923	932	803	753	762	215	111	258	387	99	147
FBgn0038647	35.6387	1.56806	0.676467	0.0213979	0.0370119	TRUE	CG14302	protein_coding	2.30089	5.43055	47.1631	104.854	115.371	59.1836	81.5699	34.0737	0	1.03094	0.954665	63.5	3.77769	8	62	125	136	60	114	40	0	1	1	36	3
FBgn0260870	91.4587	1.5668	0.211081	1.20853e-13	1.07898e-12	TRUE	CG42580	protein_coding	7.41584	103.88	149.968	198.526	127.759	171.605	142.946	60.5608	27.2221	47.931	70.7192	55.5303	33.4964	139	192	260	155	188	199	67	26	48	79	30	29
FBgn0041709	21.8513	1.56564	0.480653	0.00111581	0.0026799	TRUE	yellow-g	protein_coding	3.25957	14.5278	22.188	23.5025	41.3242	33.9289	34.8656	6.68751	17.1047	6.82796	1.72609	11.1442	7.88669	19	28	31	51	40	47	7	17	7	2	6	7
FBgn0267440	3.5281	1.56482	0.581367	0.00905948	0.0173754	TRUE	lncRNA:CR45790	ncRNA	2.6098	8.39343	8.69841	9.09225	4.87409	4.28997	4.42545	0.946873	0	0.979026	6.0753	0	2.2592	11	11	12	6	5	6	1	0	1	7	0	2
FBgn0264776	328.819	1.56419	0.278926	2.00773e-08	1.0369e-07	TRUE	CG44014	protein_coding	5.61133	193.775	415.861	312.145	394.896	364.181	433.462	92.7168	109.52	74.4317	68.6001	271.277	82.4808	254	526	412	486	424	588	98	108	76	79	146	73
FBgn0028871	3.12872	1.5638	0.649387	0.0218677	0.0376941	TRUE	Cpr35B	protein_coding	2.29266	2.28798	19.7592	6.06058	4.06414	5.16186	4.41946	0	2.03022	1.95977	3.47614	0	3.39089	3	25	8	5	6	6	0	2	2	4	0	3
FBgn0034291	1.07639	1.5632	0.78266	0.0423521	0.0672856	FALSE	CG5770	protein_coding	2.03004	0.763259	1.582	0.757751	4.87234	0.856622	1.47633	0	0	0	0	1.85791	0	1	2	1	6	1	2	0	0	0	0	1	0
FBgn0034605	257.122	1.5592	0.430903	0.000290176	0.000793895	TRUE	Ugt49C1	protein_coding	3.62392	283.922	521.676	205.885	455.753	302.852	275.668	89.3303	80.5981	36.1042	18.9799	346.059	67.6553	371	661	271	562	358	372	93	81	37	22	186	60
FBgn0054010	37.1108	1.55888	0.26566	4.70658e-09	2.63349e-08	TRUE	Glyat	protein_coding	5.85723	31.286	46.6573	62.1313	82.0426	44.6043	56.8005	17.0471	19.2517	12.7263	12.1491	29.7278	19.2021	41	59	82	101	52	77	18	19	13	14	16	17
FBgn0265719	13.8341	1.55655	0.314603	9.26441e-07	3.81133e-06	TRUE	lncRNA:CR44526	ncRNA	4.90665	25.6885	29.8275	15.9225	27.048	23.2009	26.7932	5.51448	9.32994	11.8957	6.19293	9.28666	6.85409	34	38	21	33	26	37	6	9	12	7	5	6
FBgn0034168	3.24414	1.55438	0.625978	0.0152207	0.0273752	TRUE	CG15614	protein_coding	2.42709	3.05964	6.34185	4.54935	8.09894	3.38576	3.71304	0	4.01934	0	0	0	3.37839	4	8	6	10	4	5	0	4	0	0	0	3
FBgn0035508	1316.52	1.55295	0.464254	0.000885118	0.002177	TRUE	CG15005	protein_coding	3.32471	1836.97	3120.4	2693.24	4290.66	2303.79	3160.37	427.839	2361.54	425.139	1189.73	44.5649	910.914	2399	3932	3551	5305	2738	4243	445	2359	437	1384	24	810
FBgn0266168	2.15946	1.55253	0.719087	0.0351865	0.057317	FALSE	lncRNA:CR44874	ncRNA	2.10621	2.29005	7.91093	7.57777	1.6239	0	0.738411	0.94854	1.01197	0.978308	0	0	1.12902	3	10	10	2	0	1	1	1	1	0	0	1
FBgn0035553	3784.39	1.55	0.416597	0.000199273	0.000563335	TRUE	CG13722	protein_coding	3.71994	766.472	12614.6	8172.21	5788.72	6324.88	3990.61	1344.91	3093.58	1131.48	858.823	4042.43	1365.29	1001	15896	10775	7157	7516	5358	1399	3090	1163	999	2177	1214
FBgn0051406	365.244	1.54914	0.246138	3.10658e-10	1.98549e-09	TRUE	CG31406	protein_coding	6.29336	438.31	456.612	534.233	445.433	512.212	485.511	174.86	76.7721	212.085	277.889	89.1578	119.587	574	577	705	549	600	655	184	76	217	321	48	106
FBgn0262572	0.826937	1.5475	0.804182	0.0728492	0.108555	FALSE	CG43112	protein_coding	1.79377	1.4512	0.773708	0	1.66424	6.61456	1.42699	0	0	0	0	1.82657	0	2	1	0	2	7	2	0	0	0	0	1	0
FBgn0033600	163.808	1.54749	0.324759	1.97269e-06	7.68479e-06	TRUE	Cpr47Ec	protein_coding	4.7562	116.597	404.365	499.892	409.219	334.298	311.672	70.6449	169.954	108.909	97.5259	55.7507	174.228	153	512	660	503	387	424	75	167	111	112	30	154
FBgn0038033	30.0916	1.54706	0.29584	1.87213e-07	8.52767e-07	TRUE	CG10097	protein_coding	5.21161	54.3079	40.8554	68.7636	49.8935	59.3309	61.9751	15.2299	18.9633	21.3756	27.0102	8.76577	21.1712	56	49	65	58	50	64	14	33	14	21	10	12
FBgn0267929	1.46466	1.54544	0.712367	0.0381749	0.0615119	FALSE	lncRNA:CR46210	ncRNA	2.07297	3.79806	1.57516	5.29991	1.63257	1.75365	0.729766	0.931259	0	0	0.877122	0	1.13563	5	2	7	2	2	1	1	0	0	1	0	1
FBgn0267625	12.7764	1.54459	0.369888	3.35315e-05	0.000107351	TRUE	lncRNA:CR45963	ncRNA	4.14805	11.4441	16.6039	15.1532	12.1871	22.3236	17.6956	3.78543	1.01386	1.9585	11.2866	1.85804	9.03823	15	21	20	15	26	24	4	1	2	13	1	8
FBgn0266911	4.37612	1.54279	0.643687	0.0175185	0.0309759	TRUE	asRNA:CR45371	ncRNA	2.37564	3.06013	7.13575	6.06607	13.7654	3.38274	4.45765	3.83043	0	0	1.72355	1.85718	2.2518	4	9	8	17	4	6	4	0	0	2	1	2
FBgn0039434	20.6875	1.53963	0.475332	0.00134331	0.00317508	TRUE	TwdlM	protein_coding	3.20656	3.05518	42.7438	55.3275	66.5326	70.8272	25.1458	11.4105	8.07967	21.5011	17.3118	5.5731	16.9231	4	54	73	82	83	34	12	8	22	20	3	15
FBgn0030746	21.1411	1.53789	0.35174	1.33077e-05	4.54829e-05	TRUE	CG9981	protein_coding	4.35498	31.0702	46.0984	38.6569	39.2038	32.3224	21.8043	15.3331	4.16013	8.09009	16.9726	22.8213	2.33836	39	61	49	49	37	30	16	4	8	19	13	2
FBgn0038201	49.5178	1.53616	0.427196	0.000314696	0.000853068	TRUE	PK1-R	protein_coding	3.60289	57.5618	55.6851	35.8642	41.9271	36.0748	105.479	15.6202	14.5693	15.3688	17.2013	26.3845	16.3642	73	71	52	57	37	128	15	16	17	22	15	16
FBgn0264447	23.5391	1.53604	0.311475	8.82508e-07	3.64402e-06	TRUE	asRNA:CR43865	ncRNA	4.91618	31.3408	24.5583	33.3558	31.6119	24.6366	37.8035	8.58781	10.0714	11.711	16.4103	7.4298	4.50827	41	31	44	39	29	51	9	10	12	19	4	4
FBgn0085484	3703.29	1.53205	0.184724	1.10072e-16	1.29672e-15	TRUE	Pdxk	protein_coding	8.29338	5657.91	7549.25	7034.28	6910.65	5235.34	6320.85	2004.81	2593.46	1682.08	1453.15	3589.97	1882.62	7396	9522	9277	8534	6189	8509	2094	2582	1726	1686	1933	1672
FBgn0002735	7.7246	1.53204	0.664555	0.0269081	0.0453389	TRUE	E(spl)mgamma-HLH	protein_coding	2.21285	1.52653	29.2671	24.2481	20.3012	14.562	16.24	2.84425	18.2225	1.95701	5.2032	0	0	2	37	32	25	17	22	3	18	2	6	0	0
FBgn0052797	16.4758	1.52765	0.314842	1.41057e-06	5.61679e-06	TRUE	CG32797	protein_coding	4.8235	25.9544	22.9421	28.7956	23.5459	29.1027	28.0611	11.3834	3.03569	7.82619	8.66888	1.85787	18.0638	34	29	38	29	34	38	12	3	8	10	1	16
FBgn0267930	4.34	1.52595	0.519316	0.00405232	0.00855155	TRUE	lncRNA:CR46211	ncRNA	2.87406	3.26562	7.12362	7.72752	7.51036	8.3063	9.46406	1.83359	1.05982	6.0651	0	1.87575	2.3375	5	9	10	9	9	13	2	1	6	0	1	2
FBgn0028867	5.43089	1.52315	0.445203	0.000833403	0.00206279	TRUE	CR15280	pseudogene	3.34146	12.9937	7.92122	6.82258	8.91728	9.35004	19.267	4.76895	2.01497	3.90435	4.31967	3.71496	2.25442	17	10	9	11	11	26	5	2	4	5	2	2
FBgn0051148	13.77	1.52209	0.334938	6.46009e-06	2.32429e-05	TRUE	Gba1a	protein_coding	4.51074	18.3648	21.412	20.4742	38.0468	16.8931	25.2755	6.70967	10.035	4.87042	12.0577	11.1427	2.25117	24	27	27	47	20	34	7	10	5	14	6	2
FBgn0261683	130.598	1.52101	0.194159	4.90507e-15	4.95996e-14	TRUE	B9d2	protein_coding	7.82932	185.305	197.605	254.838	194.111	219.608	199.619	74.031	38.0408	73.9371	109.172	74.2749	58.4784	242	249	336	240	261	268	77	38	76	127	40	52
FBgn0261697	130.598	1.52101	0.194159	4.90507e-15	4.95996e-14	TRUE	tctn	protein_coding	7.82932	185.305	197.605	254.838	194.111	219.608	199.619	74.031	38.0408	73.9371	109.172	74.2749	58.4784	242	249	336	240	261	268	77	38	76	127	40	52
FBgn0050181	1.95809	1.51845	0.77476	0.0745547	0.110748	FALSE	ppk3	protein_coding	1.78319	0	7.92845	12.1321	4.85849	2.53732	0.742903	0	2.00868	0	1.72364	0	2.25185	0	10	16	6	3	1	0	2	0	2	0	2
FBgn0041237	2.16751	1.51796	0.683489	0.0333518	0.054716	FALSE	Gr58c	protein_coding	2.12782	2.29322	3.96099	6.06468	4.05284	5.09739	2.96493	0	1.00716	3.90369	0.863716	0	0	3	5	8	5	6	4	0	1	4	1	0	0
FBgn0035583	323.017	1.51752	0.267165	1.33399e-08	7.01457e-08	TRUE	CG13704	protein_coding	5.68165	174.351	448.19	433.9	465.029	449.587	402.614	129.517	114.313	68.7852	101.243	249.045	147.24	229	568	573	571	518	549	138	112	70	116	134	130
FBgn0261506	22.076	1.51551	0.286412	1.35086e-07	6.28324e-07	TRUE	CG42654	protein_coding	5.27181	27.0147	32.7465	34.5384	22.5515	39.5843	24.6872	9.62004	6.69804	17.4335	12.8683	9.00566	4.42746	36	41	44	26	45	33	11	6	17	14	6	4
FBgn0031418	2415.62	1.51444	0.183242	1.40425e-16	1.63216e-15	TRUE	CG3609	protein_coding	8.26438	3740.7	4552.26	4019.66	4562.69	3383.45	4082.93	1307.31	1369.04	1143.91	1136.46	2101.87	1353.14	4954	5763	5293	5654	3953	5494	1385	1359	1174	1310	1132	1203
FBgn0002719	13556.2	1.51379	0.140334	3.9681e-27	1.10774e-25	TRUE	Men	protein_coding	10.7869	24510.8	27977.9	23733.5	26499.4	19273.6	23059.4	8004.73	7054.7	7740.46	7758.08	12952.7	6893.01	31296	34356	30513	31962	22457	30175	8341	7000	8002	9110	7068	6145
FBgn0036940	69.0802	1.51269	0.283905	1.02974e-07	4.87076e-07	TRUE	obst-J	protein_coding	5.3214	81.7904	157.645	93.2441	141.851	127.443	111.922	34.3485	14.1008	46.8453	67.3721	50.1513	29.3044	107	199	123	175	150	151	36	14	48	78	27	26
FBgn0035923	897.513	1.51026	0.192332	4.11884e-15	4.19204e-14	TRUE	CG6511	protein_coding	7.85126	871.392	2119.46	1996.57	1993.31	1335.66	1396.94	600.97	738.235	583.813	551.144	420.7	459.132	1137	2660	2624	2453	1597	1866	625	743	600	647	226	406
FBgn0052549	3926.37	1.50912	0.142064	2.34082e-26	6.06866e-25	TRUE	CG32549	protein_coding	10.6225	5411.31	8424.63	6305.85	8938.34	5500.25	6624.38	2267	2471.66	2163.48	2120.57	3196.73	2147.91	7071	10614	8295	11048	6530	8817	2355	2438	2235	2494	1718	1910
FBgn0053272	0.938161	1.50758	0.802191	0.0554923	0.0854944	FALSE	CG33272	protein_coding	1.915	0	0.756061	0.858825	2.56871	1.99576	2.86969	0	0	0	0	0	0	0	1	1	3	2	4	0	0	0	0	0	0
FBgn0037960	368.699	1.50722	0.217305	4.10796e-12	3.15708e-11	TRUE	mthl5	protein_coding	6.93342	626.092	870.17	573.374	845.754	633.619	646.423	254.228	367.141	150.885	200.533	269.207	207.085	818	1097	756	1045	751	869	265	366	155	233	145	184
FBgn0024361	527.864	1.50675	0.218943	5.92709e-12	4.47408e-11	TRUE	Tsp2A	protein_coding	6.88139	468.207	987.416	872.174	1001.73	788.049	876.635	286.86	284.186	213.284	188.063	490.105	268.677	603	1247	1149	1235	918	1171	303	281	219	218	264	239
FBgn0033628	368.872	1.50645	0.166244	1.32469e-19	2.00668e-18	TRUE	CG13203	protein_coding	9.05832	719.257	591.07	925.437	732.003	686.918	572.926	258.515	206.859	305.831	281.388	140.483	268.702	1012	840	1308	980	858	824	254	204	300	299	67	238
FBgn0034094	856.421	1.50333	0.172399	2.79909e-18	3.82168e-17	TRUE	Tsf3	protein_coding	8.71931	1183.63	1901.94	1608.6	1515.17	1165.52	1343.12	463.099	640.034	452.507	294.117	683.349	512.913	1546	2397	2121	1873	1384	1804	482	639	465	342	368	456
FBgn0033587	22.3013	1.50259	0.37366	6.43223e-05	0.000197012	TRUE	CG13218	protein_coding	3.99637	14.3904	59.7368	63.6312	43.3677	38.0995	47.9384	18.4795	4.13142	15.8249	15.8691	7.43274	26.2051	19	76	84	53	43	66	20	4	16	18	4	23
FBgn0267516	3.49029	1.50242	0.780014	0.0490804	0.0766201	FALSE	pre-rRNA:CR45856	rRNA	1.96789	9.96108	10.3238	2.27575	0	8.38246	0	4.82157	0	0	0	0	0	13	13	3	0	10	0	5	0	0	0	0	0
FBgn0051015	4.43572	1.50201	0.589928	0.0120011	0.0221948	TRUE	PH4alphaPV	protein_coding	2.51211	2.29604	3.96596	9.10013	3.23723	13.5	5.20661	4.79668	0	0	2.58242	1.85705	1.12531	3	5	12	4	16	7	5	0	0	3	1	1
FBgn0259977	305.073	1.50193	0.168941	6.19245e-19	8.86507e-18	TRUE	Tdc1	protein_coding	8.88853	478.474	580.781	495.995	554.179	452.389	446.631	157.524	163.301	120.683	153.106	308.254	160.861	625	732	654	685	537	600	164	163	124	178	166	143
FBgn0032774	1039.83	1.50155	0.286785	1.6532e-07	7.58791e-07	TRUE	CG17549	protein_coding	5.23463	1479.42	2351.13	1634.56	1958.9	1513.73	2047.52	610.146	943.244	363.669	411.011	1035.74	386.853	1922	2965	2137	2415	1783	2759	635	924	370	475	554	338
FBgn0086356	283.516	1.50036	0.171604	2.32609e-18	3.19541e-17	TRUE	tum	protein_coding	8.74024	309.3	645.079	540.748	552.527	483.428	470.516	156.597	245.41	171.276	192.647	144.841	133.855	404	813	713	683	574	632	163	245	176	224	78	119
FBgn0038465	3251	1.49936	0.158783	3.64153e-21	6.31131e-20	TRUE	Irc	protein_coding	9.44245	4254.51	6823.88	5905.03	6454.58	4928.8	5481.29	1937.01	2812.46	1844.06	1385.42	1624.81	2243.97	5557	8600	7786	7979	5853	7362	2016	2808	1895	1611	875	1995
FBgn0265819	2.99149	1.49664	0.696345	0.0387164	0.0622002	FALSE	lncRNA:CR44608	ncRNA	2.06719	0	5.50498	3.78681	14.7194	5.30167	7.27213	4.62933	2.06263	0	0.880404	1.85835	0	0	7	5	18	6	10	5	2	0	1	1	0
FBgn0034274	227.173	1.49634	0.259258	7.91107e-09	4.31973e-08	TRUE	CG10931	protein_coding	5.77034	352.35	281.197	417.691	304.817	347.695	337.893	129.703	32.2421	162.037	182.301	113.307	82.2886	461	355	551	376	409	456	136	32	166	211	61	73
FBgn0265956	4.87315	1.49453	0.60571	0.0179717	0.0316958	TRUE	lncRNA:CR44743	ncRNA	2.3662	4.96418	6.43079	9.96041	26.0399	11.6043	7.21723	3.11258	11.1909	1.41667	2.47346	0	0.915455	8	10	13	34	12	12	3	11	1	3	0	1
FBgn0034486	8.79776	1.49224	0.497781	0.00305749	0.00666634	TRUE	CG13869	protein_coding	2.9619	21.3405	21.3262	18.1784	17.8961	3.45325	14.7061	6.59666	7.1211	3.92387	3.4821	3.71663	5.65594	28	27	24	22	4	20	7	7	4	4	2	5
FBgn0031305	3.54773	1.49203	0.732036	0.0400157	0.0640292	FALSE	Iris	protein_coding	2.05359	1.53038	3.17211	5.30811	5.66663	10.1366	5.94698	0	2.0071	0	1.72258	3.71423	0	2	4	7	7	12	8	0	2	0	2	2	0
FBgn0035193	1548.98	1.49153	0.320465	3.31378e-06	1.25404e-05	TRUE	CG9192	protein_coding	4.65035	648.109	2812.62	4016.9	3933.68	4272.98	3080.62	854.329	1866.33	1106.05	951.379	508.956	1099.13	848	3551	5299	4852	5025	4158	896	1852	1133	1101	274	975
FBgn0267461	8.28803	1.49145	0.513805	0.00429588	0.00898909	TRUE	lncRNA:CR45811	ncRNA	2.85558	2.29206	26.1291	19.7074	23.5212	11.9272	17.0244	7.61676	9.08032	0.976806	5.18939	5.57283	3.38337	3	33	26	29	14	23	8	9	1	6	3	3
FBgn0001168	1898.15	1.49141	0.153745	3.0082e-22	5.6523e-21	TRUE	h	protein_coding	9.70023	2497.87	3453.16	3143.86	3326.73	2652.42	3226.03	928.98	1262.01	794.37	810.335	1641	1023.56	3298	4398	4225	4137	3185	4353	959	1262	811	935	885	899
FBgn0278597	0.873488	1.49106	0.79467	0.0799426	0.11787	FALSE	lncRNA:CR46267	ncRNA	1.75102	1.52963	0.792629	1.5164	6.48019	0.847041	1.48469	0	2.01056	0	0	0	0	2	1	2	8	1	2	0	2	0	0	0	0
FBgn0261113	11943.2	1.49006	0.130781	4.51288e-30	1.6034e-28	TRUE	Xrp1	protein_coding	11.3934	16449.7	25370.5	19293.9	26840.9	15884.4	17236.9	6828.73	7946.16	6885.51	6128.76	7346.09	7673.78	21281	31207	23584	31062	17647	21428	7271	7928	6711	7013	4106	6946
FBgn0036806	181.84	1.48989	0.261004	1.15451e-08	6.13268e-08	TRUE	Cyp12c1	protein_coding	5.70631	275.236	360.361	299.147	375.242	250.336	278.609	115.567	100.876	85.3976	48.5524	185.176	107.162	371	462	386	476	285	389	126	104	93	61	103	103
FBgn0033588	5.23625	1.48934	0.601213	0.015112	0.0272047	TRUE	CG13228	protein_coding	2.42968	1.50852	19.6053	7.58854	5.74353	8.96258	15.1802	2.74831	0	2.97804	2.65999	1.85659	6.86655	2	25	10	7	10	21	3	0	3	3	1	6
FBgn0039469	4.28787	1.48885	0.580577	0.0121239	0.0223955	TRUE	TwdlC	protein_coding	2.50852	6.88244	9.5103	8.33988	6.48124	8.47649	7.42075	1.91173	0	1.95042	0	0	10.1385	9	12	11	8	10	10	2	0	2	0	0	9
FBgn0037139	12.9194	1.48834	0.460872	0.00141238	0.00331677	TRUE	CG14563	protein_coding	3.19211	6.04923	43.1899	31.0756	27.8537	15.1361	33.3411	6.4442	3.10649	7.92485	9.72081	20.434	5.70691	8	55	41	34	17	46	7	3	8	11	11	5
FBgn0037627	89.5483	1.48709	0.246829	1.71813e-09	1.01549e-08	TRUE	CG13318	protein_coding	6.02243	113.143	143.401	81.8753	136.97	158.786	168.303	39.137	40.2734	41.9577	30.2224	94.7286	40.57	148	181	108	169	187	227	41	40	43	35	51	36
FBgn0041780	19.6055	1.48616	0.327297	6.01379e-06	2.17624e-05	TRUE	Ssl2	protein_coding	4.5259	28.3014	30.9162	29.5707	29.9664	16.0832	18.5647	12.4397	17.0827	7.79817	2.58653	7.42896	4.50457	37	39	39	37	19	25	13	17	8	3	4	4
FBgn0004192	14.5199	1.48479	0.529081	0.00558922	0.0113564	TRUE	snRNA:U2:34ABb	snRNA	2.77095	5.13293	28.9757	55.101	25.7381	43.55	21.0975	3.15236	23.876	14.0042	2.33663	3.20928	8.91757	8	40	59	27	42	29	4	24	14	2	2	6
FBgn0003950	213.082	1.4822	0.13004	4.53731e-30	1.60843e-28	TRUE	unc	protein_coding	11.3929	279.941	364.679	431.019	393.676	419.506	357.46	157.396	123.653	131.921	160.908	95.1638	120.209	366	454	571	482	497	475	166	121	136	191	51	108
FBgn0085325	379.574	1.48052	0.37637	8.90337e-05	0.000266182	TRUE	CG34296	protein_coding	3.91868	872.919	711.255	1057.66	962.851	696.255	722.548	289.856	660.985	224.459	185.008	37.0447	297.513	1166	910	1387	1169	765	1005	320	632	225	207	20	258
FBgn0036057	296.512	1.47801	0.178407	1.207e-16	1.41447e-15	TRUE	Hez	protein_coding	8.28242	435.637	516.426	537.636	520.388	467.652	532.162	190.348	117.473	233.589	267.628	113.174	138.803	581	609	705	650	580	694	206	132	257	344	74	144
FBgn0040506	96.8515	1.47734	0.231588	1.84857e-10	1.21168e-09	TRUE	ACXE	protein_coding	6.37342	127.148	164.324	206.314	146.336	156.24	172.205	70.2783	36.0006	54.45	97.9162	40.8488	38.221	166	207	272	181	186	231	73	36	56	114	22	34
FBgn0034493	246.785	1.47729	0.14408	1.18419e-24	2.66749e-23	TRUE	CG8908	protein_coding	10.2499	338.654	437.538	439.211	426.711	405.025	369.331	155.208	109.883	159.371	198.241	124.396	107.875	442	551	579	528	483	495	161	110	164	231	67	96
FBgn0036992	84.6214	1.47481	0.710958	0.0347964	0.056782	FALSE	Hpd	protein_coding	2.11072	9.76686	61.1954	27.0768	123.231	103.461	409.946	28.0865	13.1147	4.24063	0.750161	131.989	2.36738	14	76	34	147	120	535	28	15	5	1	69	2
FBgn0266752	10.6698	1.47458	0.329932	9.60676e-06	3.37034e-05	TRUE	lncRNA:CR45225	ncRNA	4.42584	16.0318	12.6587	20.4608	16.237	22.2456	17.7265	6.64248	9.10468	3.91257	6.06698	7.43137	3.38665	21	16	27	20	26	24	7	9	4	7	4	3
FBgn0065099	92.8804	1.47209	0.322279	5.13291e-06	1.88363e-05	TRUE	snRNA:7SK	snRNA	4.55928	38.3376	227.85	194.647	245.785	211.312	184.539	69.238	72.973	58.708	60.5234	51.9357	66.6036	51	291	256	299	234	256	76	70	59	68	28	58
FBgn0036876	528.22	1.47163	0.197847	1.02976e-13	9.24124e-13	TRUE	CG9451	protein_coding	7.43703	872.689	1139.67	1045.19	794.013	756.501	885.156	332.697	228.152	274.656	202.243	590.346	334.101	1158	1487	1403	1022	910	1217	348	226	270	230	314	293
FBgn0030108	1.5495	1.4684	0.718354	0.047894	0.0750152	FALSE	Gr8a	protein_coding	1.97831	4.58934	0	3.7911	2.42977	1.69314	1.4851	0	1.00493	0	1.72444	0	0	6	0	5	3	2	2	0	1	0	2	0	0
FBgn0030107	3.27976	1.46567	0.655877	0.027607	0.0463779	TRUE	CG15370	protein_coding	2.20283	7.64435	2.37669	3.79046	3.24211	0	10.3784	0.954336	3.02108	0.975855	0.863626	0	1.12702	10	3	5	4	0	14	1	3	1	1	0	1
FBgn0032085	5.64404	1.46496	0.555833	0.00931901	0.0177902	TRUE	CG9555	protein_coding	2.60012	8.11748	13.4602	2.41507	8.60729	9.92264	15.5481	3.04003	2.13887	1.03631	4.58569	7.99162	0	10	16	3	10	11	21	3	2	1	5	5	0
FBgn0038194	320.7	1.4649	0.304649	1.52556e-06	6.04082e-06	TRUE	Cyp6d5	protein_coding	4.80786	478.925	603.386	456.476	590.27	334.834	550.567	158.026	175.729	137.393	180.096	280.433	121.592	626	761	602	729	396	741	165	175	141	209	151	108
FBgn0267035	135.41	1.46436	0.201121	3.41302e-13	2.93168e-12	TRUE	asRNA:CR45479	ncRNA	7.27701	260.306	299.931	244.968	186.869	162.533	175.707	82.6274	98.1588	45.7373	92.8793	90.9894	65.239	340	378	323	231	193	236	86	98	47	108	49	58
FBgn0039440	1.37586	1.46363	0.791532	0.0616896	0.0937966	FALSE	TwdlJ	protein_coding	1.86852	0	0.790987	1.5155	6.49657	4.28337	1.47628	0	2.02487	0	0	0	0	0	1	2	8	5	2	0	2	0	0	0	0
FBgn0030538	66.05	1.46279	0.278663	1.57429e-07	7.25203e-07	TRUE	betaNACtes1	protein_coding	5.24365	101.61	82.3421	132.644	80.3015	121.862	120.634	32.3642	13.1183	36.1451	70.9313	50.1559	22.5573	133	104	175	99	143	163	34	13	37	82	27	20
FBgn0265530	9.12005	1.46185	0.424437	0.000617997	0.00157119	TRUE	lncRNA:CR44380	ncRNA	3.42359	8.40441	5.54265	9.09577	9.73266	11.074	15.5449	3.80872	2.0177	5.86062	0	5.57281	3.38329	11	7	12	12	13	21	4	2	6	0	3	3
FBgn0050272	1.28564	1.46172	0.804619	0.0636399	0.0964313	FALSE	MFS1	protein_coding	1.85469	0.765121	0.792954	0	7.2865	0	5.20229	0.958094	0	0	0	0	0	1	1	0	9	0	7	1	0	0	0	0	0
FBgn0050401	80.7982	1.46109	0.226672	1.20612e-10	8.0509e-10	TRUE	dany	protein_coding	6.43856	133.889	128.622	167.361	124.704	150.082	114.484	52.7089	30.5715	47.3041	84.6893	37.2634	34.9687	176	163	222	155	176	155	54	30	49	99	19	31
FBgn0053514	34.7035	1.46066	0.490457	0.00287103	0.00629668	TRUE	CG33514	protein_coding	2.98122	9.93537	52.2748	90.9652	41.3489	39.9721	47.4134	7.62704	11.0862	24.4065	16.4192	20.4326	11.2735	13	66	120	51	47	64	8	11	25	19	11	10
FBgn0050468	4.7352	1.4603	0.50699	0.00473365	0.00978852	TRUE	Ir52c	protein_coding	2.82462	3.8261	11.1028	6.06648	10.5232	10.1343	6.69112	0.958643	0	2.9221	6.02836	0	4.50217	5	14	8	13	12	9	1	0	3	7	0	4
FBgn0051220	5.52562	1.45947	0.507825	0.00470015	0.00972825	TRUE	CG31220	protein_coding	2.8269	8.41232	8.71826	10.6146	14.5818	5.08435	11.1328	1.91218	4.02217	0	2.58789	7.42922	4.50568	11	11	14	18	6	15	2	4	0	3	4	4
FBgn0014000	633.554	1.45652	0.184387	2.84199e-15	2.92487e-14	TRUE	Hf	protein_coding	7.89766	1443.18	1378.57	763.034	1458.63	862.216	1171.15	396.121	545.861	389.518	349.58	392.026	470.929	1891	1743	1007	1796	1006	1587	418	539	398	403	211	417
FBgn0052194	143.538	1.45606	0.187197	7.64905e-15	7.59705e-14	TRUE	lncRNA:CR32194	ncRNA	7.77326	292.268	293.385	232.791	248.559	178.352	251.919	79.512	123.487	95.483	66.3409	53.8575	115.955	382	370	307	307	211	339	83	123	98	77	29	103
FBgn0002569	89.0497	1.45558	0.481369	0.00237034	0.00530274	TRUE	Mal-A2	protein_coding	3.03942	38.2704	133.267	125.13	118.146	92.7695	75.1415	20.1534	7.01773	12.6567	20.6546	118.849	14.6274	50	168	165	146	110	101	21	7	13	24	64	13
FBgn0004378	290.956	1.4555	0.204747	1.1887e-12	9.60362e-12	TRUE	Klp61F	protein_coding	7.10668	324.032	659.746	596.203	507.659	473.482	406.406	156.996	306.891	125.405	181.178	152.252	139.375	423	831	786	628	564	545	163	307	129	211	82	124
FBgn0001227	2405.07	1.45504	0.431367	0.000796359	0.00197988	TRUE	Hsp67Ba	protein_coding	3.35406	2116.42	7227.32	6463.69	7021.35	3655.98	5220.06	1723.96	5037.58	1194.35	1313.63	170.856	1244.99	2766	9114	8524	8673	4327	7023	1799	5019	1226	1525	92	1106
FBgn0040959	6.1393	1.45428	0.593284	0.0175199	0.0309759	TRUE	Peritrophin-15a	protein_coding	2.37561	2.93839	27.1772	13.1796	13.2679	6.53648	15.7199	2.66715	8.43306	1.00646	1.81444	11.0241	1.17394	4	35	17	16	7	22	3	8	1	2	6	1
FBgn0267169	1.40657	1.45282	0.732216	0.0569938	0.0875661	FALSE	lncRNA:CR45609	ncRNA	1.90336	2.27334	3.93137	3.78704	3.27184	0.884552	0	0.925118	1.03191	0.988555	0	0	0	3	5	5	4	1	0	1	1	1	0	0	0
FBgn0038309	62.2575	1.45276	0.401032	0.000289095	0.000791328	TRUE	Amt	protein_coding	3.62488	38.2598	96.75	125.878	110.903	85.3127	85.4896	17.2531	36.1268	19.4819	8.61273	92.8556	15.7583	50	122	166	137	101	115	18	36	20	10	50	14
FBgn0032381	113.176	1.45269	0.75535	0.0238786	0.0407127	TRUE	Mal-B1	protein_coding	2.25908	32.1398	36.4814	18.9578	26.7122	26.1778	113.754	2.87614	2.00669	2.92201	1.72231	31.5706	3.37656	42	46	25	33	31	153	3	2	3	2	17	3
FBgn0265835	3.10915	1.45132	0.799788	0.110684	0.156266	FALSE	CG44624	protein_coding	1.59512	2.19216	6.20223	0.779226	3.322	31.9232	2.14191	0	7.38692	2.017	0	0	0	3	8	1	4	34	3	0	7	2	0	0	0
FBgn0262905	14.9412	1.45011	0.274831	1.63225e-07	7.50056e-07	TRUE	lncRNA:CR43260	ncRNA	5.23698	24.2115	29.065	28.0374	18.0152	28.4435	29.7388	11.9831	5.17279	10.8908	11.4786	5.57356	9.12505	32	37	37	22	32	41	13	5	11	13	3	8
FBgn0028562	22.7851	1.44997	0.430894	0.000733912	0.00183896	TRUE	sut2	protein_coding	3.37659	18.3604	36.4709	28.8137	25.1022	21.1443	31.2019	9.57528	1.00434	3.89802	2.58546	31.5722	10.1333	24	46	38	31	25	42	10	1	4	3	17	9
FBgn0264900	8.67261	1.44988	0.475811	0.0024336	0.0054264	TRUE	lncRNA:CR44091	ncRNA	3.03148	8.83575	6.21641	16.2441	12.429	12.1077	3.57425	0.890725	4.2142	6.03275	4.52838	0	2.34281	12	8	21	15	13	5	1	4	6	5	0	2
FBgn0039478	266.255	1.44958	0.12756	6.58327e-30	2.28196e-28	TRUE	Nep5	protein_coding	11.3604	359.77	539.697	461.381	502.038	389.687	434.371	163.222	129.141	162.623	181.008	187.311	157.609	473	680	615	619	465	578	174	125	168	211	98	139
FBgn0014466	28.4554	1.44943	0.553662	0.00947653	0.0180403	TRUE	Cp7Fc	protein_coding	2.59437	5.34891	64.9363	51.5445	89.2026	85.1269	43.6886	9.52682	65.5477	13.6718	2.59369	3.71513	11.2759	7	82	68	110	100	59	10	65	14	3	2	10
FBgn0053460	48.3247	1.44872	0.186086	7.85016e-15	7.78091e-14	TRUE	CG33460	protein_coding	7.76997	93.1391	78.3271	71.2343	69.8177	71.0076	93.8075	25.623	24.2776	18.5841	32.0667	46.4459	31.608	122	99	94	86	83	127	27	24	19	37	25	28
FBgn0034670	130.288	1.44443	0.176975	3.46675e-16	3.88778e-15	TRUE	CG13488	protein_coding	8.15587	168.211	246.059	273.022	234.652	217.668	246.142	87.2951	47.0063	82.4456	122.616	91.2815	72.0023	223	310	361	287	252	333	94	46	85	141	49	64
FBgn0026175	81.7212	1.44118	0.236583	1.16203e-09	6.98693e-09	TRUE	SkpC	protein_coding	6.0854	124.726	114.304	168.086	119.042	157.042	134.596	69.1754	20.4773	43.3073	71.7487	40.8904	46.4986	164	145	222	146	180	184	74	20	44	82	22	41
FBgn0263999	6.72966	1.4403	0.499874	0.00416434	0.0087431	TRUE	CG43742	protein_coding	2.86544	6.11911	7.13437	9.85685	4.85954	4.23289	5.19783	2.87044	2.00988	2.92442	0.862225	1.85725	1.12617	8	9	13	6	5	7	3	2	3	1	1	1
FBgn0263971	1.88608	1.43887	0.730063	0.0713139	0.10645	FALSE	CG43725	protein_coding	1.80347	0.752365	3.91639	2.27979	8.21651	3.6058	7.93455	1.82445	3.12491	0	0	0	2.29472	1	5	3	10	4	11	2	3	0	0	0	2
FBgn0016036	8.81464	1.43851	0.444536	0.00129099	0.00306393	TRUE	mei-P22	protein_coding	3.21797	8.4003	7.91413	5.30512	10.5501	5.97911	7.39227	2.85051	0	4.88812	3.46399	1.85775	1.12845	11	10	7	13	7	10	3	0	5	4	1	1
FBgn0035666	1.01968	1.4377	0.740081	0.104927	0.149256	FALSE	Jon65Aii	protein_coding	1.62142	2.28839	4.74306	9.84894	0	0	1.47389	0	0	0	0	0	0	3	6	13	0	0	2	0	0	0	0	0	0
FBgn0039053	1.34971	1.43471	0.78788	0.0529999	0.0820843	FALSE	CG6738	protein_coding	1.93492	0	2.37695	4.5487	1.62083	1.69773	0	0	1.00664	0	0	0	0	0	3	6	2	2	0	0	1	0	0	0	0
FBgn0051087	107.257	1.4291	0.286817	6.26934e-07	2.64032e-06	TRUE	CG31087	protein_coding	4.98273	122.387	163.304	153.938	203.355	76.2563	174.467	60.2567	34.188	44.8583	37.9567	107.74	41.6816	160	206	203	251	90	235	63	34	46	44	58	37
FBgn0052823	415.545	1.42874	0.122739	2.59269e-31	1.02611e-29	TRUE	Sdic3	protein_coding	11.6396	534.359	571.924	567.746	598.36	638.818	530.72	228.926	192.928	172.946	198.094	305.422	187.83	703	726	754	745	764	718	240	194	179	232	153	160
FBgn0031091	184.526	1.42804	0.188744	3.93592e-14	3.6647e-13	TRUE	Phf7	protein_coding	7.56309	263.769	311.618	328.597	321.365	274.958	302.913	114.381	60.247	106.933	166.241	146.811	68.8181	340	399	439	395	326	406	120	62	107	190	79	59
FBgn0025383	13.3857	1.42641	0.42423	0.000830691	0.00205673	TRUE	CG14780	protein_coding	3.34236	5.34784	26.1275	26.5287	30.8231	25.5666	22.2021	8.56668	16.1461	3.90763	4.32518	13.0034	2.25575	7	33	35	38	30	30	9	16	4	5	7	2
FBgn0261575	58.3029	1.42378	0.442371	0.00123938	0.00295085	TRUE	tobi	protein_coding	3.22966	45.1618	57.1181	50.811	42.0764	43.8401	55.0634	14.3991	14.0325	18.4963	17.2093	7.42799	27.0024	59	72	67	52	52	74	15	14	19	20	4	24
FBgn0265980	0.625459	1.4236	0.804689	0.0823237	0.120967	FALSE	lncRNA:CR44759	ncRNA	1.73736	0.755609	1.59149	2.28667	0.816688	2.58294	0	0	0	0	0	0	0	1	2	3	1	3	0	0	0	0	0	0	0
FBgn0262140	3.61164	1.42326	0.692469	0.0382292	0.0615744	FALSE	CG42866	protein_coding	2.07239	2.23729	7.0241	9.94368	2.47482	6.41189	0	0	4.19339	0	0	3.69888	0	3	9	13	3	7	0	0	4	0	0	2	0
FBgn0034005	47.4608	1.42269	0.174699	4.54391e-16	5.01659e-15	TRUE	ItgaPS4	protein_coding	8.12311	74.2955	96.0515	101.639	93.7871	89.8927	85.7237	29.8409	45.0047	32.0881	34.3589	24.1381	31.4772	97	121	134	116	107	115	31	45	33	40	13	28
FBgn0267464	36.681	1.4226	0.24972	1.29598e-08	6.82846e-08	TRUE	asRNA:CR45814	ncRNA	5.68659	33.513	47.3619	84.0615	58.6118	54.5712	40.3745	15.0391	22.4272	19.6403	19.1825	22.3014	18.1133	44	60	111	72	63	55	16	22	20	22	12	16
FBgn0034247	94.5576	1.42033	0.474601	0.00253083	0.00561437	TRUE	CG6484	protein_coding	3.01963	13.0049	38.0555	21.231	29.152	53.2923	111.426	16.2759	19.0843	4.87278	25.8567	11.1432	10.1337	17	48	28	36	63	150	17	19	5	30	6	9
FBgn0037503	366.32	1.41979	0.507187	0.00552909	0.0112567	TRUE	CG14598	protein_coding	2.77447	39.748	1717.44	977.922	735.21	903.224	357.247	229.929	383.764	118.093	80.3316	622.249	146.525	52	2168	1290	907	1063	482	241	381	121	93	335	130
FBgn0035608	528.053	1.4197	0.254634	2.48353e-08	1.27004e-07	TRUE	blanks	protein_coding	5.57442	730.069	723.338	1010.55	815.345	922.194	963.829	393.265	126.865	388.358	539.698	226.606	202.852	955	913	1333	1006	1086	1300	412	126	398	625	122	180
FBgn0010441	887.85	1.41909	0.145196	1.47902e-22	2.85805e-21	TRUE	pll	protein_coding	9.7724	1907.21	1906.8	1619.06	1706.06	1286.85	1398.27	529.511	820.364	529.734	576.769	473.548	710.085	2492	2404	2135	2108	1525	1880	552	818	544	670	255	631
FBgn0002570	188.325	1.41871	0.779996	0.0285862	0.0478006	TRUE	Mal-A1	protein_coding	2.18915	3.82622	69.7914	29.5744	36.425	32.0864	426.782	14.3816	3.00989	2.92194	6.88897	63.1411	0	5	88	39	45	38	574	15	3	3	8	34	0
FBgn0016076	1592.96	1.41843	0.260006	4.93426e-08	2.43874e-07	TRUE	vri	protein_coding	5.45366	2992.9	3963.64	2721.5	3366.06	2145.27	3029.18	1830.95	1684.87	693.701	832.389	632.796	957.857	3875	5002	3682	4235	2548	4072	1901	1691	684	974	340	847
FBgn0031263	3037.89	1.41775	0.293252	1.33591e-06	5.3317e-06	TRUE	Tspo	protein_coding	4.83434	2281.18	6029.54	4851.28	6299.19	3899.08	5428.73	1392.04	2333.96	1078.17	851.722	3545.14	1212.27	2990	7626	6403	7753	4541	7363	1471	2302	1101	981	1908	1073
FBgn0038804	474.658	1.41733	0.169713	6.82888e-17	8.19308e-16	TRUE	CG10877	protein_coding	8.34996	674.718	939.482	884.115	852.711	701.31	791.841	246.04	436.951	213.433	234.442	380.727	288.253	882	1185	1166	1053	829	1066	257	435	219	272	205	256
FBgn0053494	877.933	1.41661	0.135462	1.3658e-25	3.35717e-24	TRUE	CG33494	protein_coding	10.4567	1321.42	1848.18	1372.57	1613.06	1151.01	1553.01	536.869	687.617	526.906	396.092	545.691	604.452	1717	2314	1789	1965	1317	2092	562	676	529	459	297	528
FBgn0030340	5.87266	1.41648	0.565072	0.0138182	0.0251244	TRUE	CG15740	protein_coding	2.46196	25.2751	12.7006	4.55098	10.511	5.04155	8.19898	2.88745	4.00084	1.94484	6.01331	0	5.62114	33	16	6	13	6	11	3	4	2	7	0	5
FBgn0037354	826.617	1.41377	0.180406	4.65196e-15	4.71928e-14	TRUE	CG12171	protein_coding	7.83598	1064.65	1664.5	1215.66	1651.31	1091.9	1424.12	496.188	513.201	421.286	317.741	789.532	479.537	1394	2103	1604	2035	1279	1926	522	508	431	367	425	425
FBgn0025643	229.043	1.41254	0.413987	0.000638999	0.00162035	TRUE	CG3588	protein_coding	3.4145	70.3336	408.112	359.464	356.886	339.568	407.262	99.7381	79.1439	34.4066	53.8792	330.908	84.2594	92	522	472	448	411	562	101	79	36	63	172	82
FBgn0266232	8.18224	1.4119	0.434902	0.00126515	0.00300898	TRUE	lncRNA:CR44927	ncRNA	3.22377	6.11264	11.8778	13.6439	4.05499	15.3284	8.14385	2.85723	2.01731	3.90669	5.18831	3.71517	2.25537	8	15	18	5	18	11	3	2	4	6	2	2
FBgn0085471	2.51715	1.41131	0.678759	0.0476535	0.0746685	FALSE	CG34442	protein_coding	1.98045	1.52557	3.16198	7.57607	8.93943	6.87618	3.68454	0	6.08718	0	1.73732	0	1.13006	2	4	10	11	8	5	0	6	0	2	0	1
FBgn0032613	32.6299	1.40943	0.424398	0.000877586	0.00216018	TRUE	Nepl9	protein_coding	3.32709	13.7784	54.739	18.2011	42.8847	52.2663	33.486	13.4401	10.0227	9.73461	5.16258	12.9989	23.6266	18	69	24	53	62	45	14	10	10	6	7	21
FBgn0267322	6.18521	1.40929	0.59006	0.018421	0.0324115	TRUE	lncRNA:CR45758	ncRNA	2.35704	10.6684	11.8457	14.3907	10.5771	9.50537	5.87964	4.70845	0	0	12.1929	1.85835	0	14	15	19	13	11	8	5	0	0	14	1	0
FBgn0260745	22365.8	1.4076	0.166038	2.30733e-17	2.89258e-16	TRUE	mfas	protein_coding	8.47717	50027	49237.4	38809.9	49186.5	32756.9	38437.9	16749.3	21176.6	16802.6	16122	8419.71	17120.1	66053	63278	52010	61835	39266	52191	17304	20926	16993	18561	4472	15035
FBgn0052195	397.697	1.40692	0.152915	3.61512e-20	5.74341e-19	TRUE	CG32195	protein_coding	9.19894	625.343	852.207	526.487	803.763	575.84	622.855	216.721	319.082	234.297	183.617	288.175	260.722	834	1128	712	1012	691	867	227	320	238	218	153	230
FBgn0038240	1.59139	1.40605	0.748243	0.0661833	0.0997535	FALSE	CG14851	protein_coding	1.83718	0	2.3565	3.78894	4.91346	2.66711	0.725275	0	0	0.990139	1.76613	0	0	0	3	5	6	3	1	0	0	1	2	0	0
FBgn0030221	60.8636	1.40331	0.352502	7.00344e-05	0.000212922	TRUE	Rab9Db	protein_coding	3.97617	97.6697	72.751	107.592	75.5477	113.25	106.213	31.2479	18.2409	44.0556	77.2415	22.296	10.1663	128	92	142	93	132	144	33	18	45	89	12	9
FBgn0039630	24.4019	1.40313	0.277908	5.06673e-07	2.16593e-06	TRUE	CG11843	protein_coding	5.02377	47.6691	54.8644	58.6198	45.6338	31.6987	47.5548	13.3764	29.4101	12.7597	21.7308	7.46369	18.0353	63	69	77	56	37	64	14	29	13	25	4	17
FBgn0034480	58.0258	1.40223	0.552543	0.0114148	0.0212362	TRUE	CG16898	protein_coding	2.52974	96.3379	142.63	62.9252	161.255	79.7538	84.5565	35.341	10.0633	6.82854	6.0421	144.875	5.63369	126	180	83	199	94	114	37	10	7	7	78	5
FBgn0052248	1.05667	1.40208	0.776948	0.0958846	0.138204	FALSE	CG32248	protein_coding	1.66514	0.760331	1.5763	6.05696	0.815564	1.7469	2.92445	0	0	0	1.75093	0	1.13445	1	2	8	1	2	4	0	0	0	2	0	1
FBgn0037801	577.975	1.40162	0.24005	5.26717e-09	2.93135e-08	TRUE	CG3999	protein_coding	5.8385	1042.38	1059.69	931.428	895.079	564.723	889.906	266.582	377.108	218.803	221.647	625.739	291.183	1361	1335	1228	1107	672	1194	277	377	225	258	337	259
FBgn0266138	1.05644	1.40111	0.77966	0.0613839	0.0933841	FALSE	lncRNA:CR44844	ncRNA	1.87072	0.747672	2.34363	3.05312	0	2.73651	0	0	1.04673	0	0	0	0	1	3	4	0	3	0	0	1	0	0	0	0
FBgn0262794	35.7544	1.40087	0.302379	3.80215e-06	1.42437e-05	TRUE	CG43175	protein_coding	4.62191	67.0291	54.1813	52.9966	90.6362	80.8426	40.0967	19.5651	10.869	32.3523	30.926	22.0217	23.9608	80	63	66	95	88	54	22	10	37	39	15	23
FBgn0039678	3056.37	1.40055	0.187423	7.89905e-14	7.15445e-13	TRUE	Obp99a	protein_coding	7.47199	3387.31	5572.65	5516.17	5760.74	5420.16	8210.6	1765.15	2084.68	2400.51	2829.16	1773.81	1800.74	4470	7092	7289	7068	6174	11275	1900	2026	2429	3221	953	1584
FBgn0266780	24.4845	1.40022	0.391681	0.000362435	0.000968042	TRUE	lncRNA:CR45245	ncRNA	3.56603	32.1145	24.5655	44.7307	27.5491	67.854	37.0921	19.108	1.00613	12.6803	15.5344	18.5736	16.8999	42	31	59	34	80	50	20	1	13	18	10	15
FBgn0259171	1065.83	1.40015	0.12558	7.26064e-29	2.33071e-27	TRUE	Pde9	protein_coding	11.1488	1835.46	1892.65	1554.27	1780.34	1332.36	1601.31	663.378	818.254	601.012	467.883	496.641	715.214	2193	2238	1940	2118	1559	2037	645	680	586	550	253	598
FBgn0001228	887.605	1.39894	0.230903	1.38552e-09	8.27973e-09	TRUE	CG4456	protein_coding	6.05715	852.786	2034.6	1850.95	2408.25	1318.95	1568.03	511.762	1045	571.721	695.772	435.057	467.066	1165	2352	2301	2668	1449	2103	665	953	705	989	284	495
FBgn0029995	26.2568	1.39872	0.30702	5.72995e-06	2.08559e-05	TRUE	CG2256	protein_coding	4.53612	38.9727	70.4834	60.6415	62.4377	22.1266	42.2138	15.2464	27.2225	9.76465	11.2377	22.2906	24.8053	51	89	80	77	26	57	16	27	10	13	12	22
FBgn0035409	23.9303	1.39797	0.301713	3.7938e-06	1.42158e-05	TRUE	CG14963	protein_coding	4.62237	19.0842	28.4801	48.498	22.7338	42.7965	33.9693	7.58916	17.2019	11.7392	11.2694	11.1472	12.4188	25	36	64	28	50	46	8	17	12	13	6	11
FBgn0002466	272.345	1.39785	0.211125	3.61432e-11	2.53148e-10	TRUE	sti	protein_coding	6.61908	271.274	598.836	525.737	474.364	423.268	395.855	144.677	274.63	150.607	170.743	161.537	100.003	354	754	693	587	505	531	150	275	155	199	87	89
FBgn0034784	4.12641	1.39738	0.689663	0.0423416	0.0672757	FALSE	CG9826	protein_coding	2.03015	3.50839	0.72721	10.4279	8.1593	3.86435	4.09257	0	0	1.12138	2.36638	0	4.1255	5	1	15	11	5	6	0	0	1	3	0	4
FBgn0085283	2.95168	1.39644	0.662504	0.0438684	0.0694335	FALSE	CR34254	pseudogene	2.01535	0.763986	7.12579	7.57966	4.05561	11.9302	5.92078	2.85572	0	3.90755	2.59502	1.85762	0	1	9	10	5	14	8	3	0	4	3	1	0
FBgn0038151	75.6849	1.39606	0.245455	1.36968e-08	7.19255e-08	TRUE	yellow-e2	protein_coding	5.67714	81.8521	179.172	129.659	208.931	148.06	157.469	43.0774	60.2729	62.3751	76.7148	24.1437	65.3087	107	226	171	258	175	212	45	60	64	89	13	58
FBgn0039419	1220.5	1.39517	0.181062	1.30621e-14	1.26205e-13	TRUE	CG12290	protein_coding	7.70522	1254.9	2605.14	1893.34	2235.65	1528.64	1680.58	661.053	740.45	526.789	547.661	865.217	868.723	1638	3281	2496	2766	1822	2253	686	741	542	638	466	773
FBgn0052601	67.013	1.39489	0.273534	3.5076e-07	1.54072e-06	TRUE	betaNACtes3	protein_coding	5.09391	76.3541	98.1191	132.622	112.827	124.818	122.657	47.4755	22.2448	35.2046	51.9824	57.5917	33.8604	100	124	175	139	146	166	50	22	36	60	31	30
FBgn0051427	10.3826	1.39436	0.387928	0.000352365	0.00094421	TRUE	CR31427	pseudogene	3.57341	12.2283	8.71256	19.7092	12.1613	9.35465	11.8537	4.76711	5.03899	0.976242	6.04901	0	7.89135	16	11	26	15	11	16	5	5	1	7	0	7
FBgn0029932	177.355	1.39365	0.571423	0.0143987	0.0260527	TRUE	CG4607	protein_coding	2.44716	95.281	335.11	242.518	365.873	180.045	291.607	38.7951	45.7268	26.0742	28.9316	313.6	35.2721	126	433	346	456	220	370	42	44	29	31	161	31
FBgn0029907	21.9757	1.39228	0.316083	1.13931e-05	3.9422e-05	TRUE	Atx-1	protein_coding	4.38889	25.9472	44.2896	38.6437	38.9855	30.0048	36.1561	15.1597	5.0644	21.5328	13.8807	14.8636	7.90571	34	56	51	48	35	49	16	5	22	16	8	7
FBgn0051810	2.3782	1.39218	0.793095	0.0519233	0.0806796	FALSE	CG31810	protein_coding	1.94377	1.52829	0	0	5.67637	5.10698	4.44319	0	0	0	0	0	2.25512	2	0	0	7	6	6	0	0	0	0	0	2
FBgn0037662	151.755	1.38968	0.487883	0.00482207	0.00994766	TRUE	CG11997	protein_coding	2.81869	771.031	370.999	366.223	195.994	83.7968	199.762	251.676	140.676	39.9649	50.8669	161.58	43.919	1008	468	483	242	99	269	263	140	41	59	87	39
FBgn0264602	12.6659	1.38677	0.279308	9.01636e-07	3.71809e-06	TRUE	lncRNA:CR43951	ncRNA	4.91197	25.2008	24.5337	28.7992	29.2159	21.3546	25.1334	15.2024	10.1058	8.7987	9.52611	5.57326	6.77077	33	31	38	36	25	34	16	10	9	11	3	6
FBgn0032086	2.63113	1.38466	0.672307	0.0444457	0.0702264	FALSE	CG17906	protein_coding	2.00986	1.52712	7.12171	1.51569	4.05842	6.83849	4.43366	0	3.03314	0.977865	1.73264	0	1.12865	2	9	2	5	8	6	0	3	1	2	0	1
FBgn0040296	11.962	1.38382	0.574033	0.0199928	0.0348554	TRUE	Ocho	protein_coding	2.32648	13.8397	28.0193	31.8794	31.8605	11.4062	44.3047	13.6241	26.9393	5.42108	0.961234	2.05732	5.00362	18	33	38	41	12	60	13	24	5	1	1	4
FBgn0038466	407.148	1.38177	0.266188	2.09795e-07	9.50644e-07	TRUE	CG8907	protein_coding	5.19044	241.306	704.757	794.28	792.641	567.67	659.801	232.441	234.32	190.684	162.497	362.229	226.027	315	888	1047	980	674	886	242	234	196	189	195	201
FBgn0263019	13.4304	1.3803	0.384727	0.000349104	0.000936802	TRUE	lncRNA:CR43314	ncRNA	3.57584	13.2105	21.4506	10.7514	19.0278	17.265	20.9442	15.6838	4.31471	7.85822	2.90169	0	6.91887	24	29	17	22	27	37	10	5	9	3	0	6
FBgn0027836	2728.63	1.37881	0.133479	5.18916e-25	1.20538e-23	TRUE	Dgp-1	protein_coding	10.3294	2727.27	5390.2	4842.01	5746.64	4138.17	5289.38	1744.7	1716.04	1743.3	1907.43	1872.18	1764.59	3560	6944	6523	7273	4998	7274	1800	1707	1773	2190	999	1556
FBgn0030893	435.876	1.37759	0.187826	2.25344e-13	1.96915e-12	TRUE	RhoGAP16F	protein_coding	7.33283	491.371	956.728	778.49	927.213	601.149	768.825	266.216	443.177	308.627	205.818	207.948	283.028	640	1161	1006	1116	697	1000	281	445	323	246	112	263
FBgn0029728	629.259	1.3766	0.221343	5.02295e-10	3.13593e-09	TRUE	CG2861	protein_coding	6.21839	764.879	1100.05	1208.38	989.117	1147.53	970.813	456.35	180.764	417.169	654.284	323.079	300.928	1001	1380	1596	1228	1371	1304	472	178	430	763	175	266
FBgn0263869	28.7659	1.37659	0.392613	0.000465447	0.00121739	TRUE	lncRNA:CR43716	ncRNA	3.49989	19.7819	37.8524	42.4011	46.456	49.6359	50.5205	24.3404	8.18145	8.85293	17.4837	1.85861	26.0714	26	48	56	57	57	69	26	8	9	20	1	23
FBgn0250904	1057.55	1.37638	0.248934	3.226e-08	1.62947e-07	TRUE	CG34434	protein_coding	5.52871	1299.93	1429.68	1990.49	1322.92	1854.35	1900.26	727.157	232.906	741.432	985.59	525.573	469.437	1699	1803	2625	1634	2194	2557	759	232	761	1144	283	417
FBgn0023395	221.893	1.37619	0.208649	4.28875e-11	2.98513e-10	TRUE	Chd3	protein_coding	6.59374	313.237	343.687	423.233	334.765	371.534	359.941	162.611	61.0273	127.403	206.209	167.113	89.946	409	433	558	414	442	483	169	61	131	240	90	80
FBgn0264902	10.5226	1.37527	0.480771	0.00462063	0.00959414	TRUE	asRNA:CR44093	ncRNA	2.83236	10.5213	29.749	24.3352	24.6651	10.843	15.8553	12.7486	8.34184	1.9905	0.890354	9.27312	8.04108	14	38	32	30	12	22	14	8	2	1	5	7
FBgn0053983	10.0312	1.37269	0.606972	0.0263627	0.044487	TRUE	obst-H	protein_coding	2.22083	3.05314	33.223	24.2483	20.3006	26.5503	14.0265	3.79277	16.1963	6.84921	0.867136	11.1474	1.12914	4	42	32	25	31	19	4	16	7	1	6	1
FBgn0264077	252.212	1.36928	0.261864	1.7173e-07	7.85913e-07	TRUE	Cnx14D	protein_coding	5.22759	304.725	336.446	477.807	344.595	399.915	422.196	163.366	72.1052	175.15	282.903	76.1334	86.6053	398	424	630	426	475	567	170	72	180	329	41	77
FBgn0264979	420.405	1.36887	0.372914	0.000241572	0.000671614	TRUE	CG4267	protein_coding	3.67103	364.907	821.105	652.636	618.368	575.057	737.548	199.615	222.759	172.773	80.945	517.169	189.9	518	1093	891	794	721	1037	202	214	170	90	274	164
FBgn0036777	61.6634	1.36848	0.163567	6.72615e-17	8.07602e-16	TRUE	CG7341	protein_coding	8.35175	100.884	154.589	98.5858	103.711	110.165	108.392	37.3007	48.2711	39.0106	53.3305	48.3	33.7985	132	195	130	128	130	146	39	48	40	62	26	30
FBgn0034512	2319.91	1.36714	0.168205	4.38955e-16	4.85303e-15	TRUE	CG18067	protein_coding	8.1273	3807.25	3811.83	4186.79	4722.34	4679.01	3722.58	1493.62	2266.21	1321.32	1053.53	1782.06	1650.3	5001	4845	5528	5824	5432	5053	1577	2219	1347	1209	963	1455
FBgn0046297	4924.21	1.36708	0.220405	5.53262e-10	3.43493e-09	TRUE	lncRNA:CR9284	ncRNA	6.2032	5340.22	5031.38	5494.43	5692.57	5420.69	5010.98	2007.33	957.203	2483.54	3328.31	1780.04	1614.27	6999	6362	7252	7009	6321	6792	2119	945	2537	3836	958	1429
FBgn0265429	32.6012	1.36517	0.260317	1.66552e-07	7.63999e-07	TRUE	CG44341	protein_coding	5.23325	45.0427	55.3828	48.4999	44.6509	55.6084	42.1026	19.929	9.1041	18.5841	30.3334	18.5784	12.4174	59	70	64	55	65	57	21	9	19	35	10	11
FBgn0003356	48.0488	1.36474	0.647199	0.0396765	0.063558	FALSE	Jon99Cii	protein_coding	2.0571	84.692	120.189	87.8902	138.922	70.3801	120.204	25.5587	70.9541	34.2697	26.9095	9.29011	28.2422	111	152	116	171	82	163	27	70	35	31	5	25
FBgn0265893	4.12342	1.36437	0.562152	0.0174446	0.0308706	TRUE	lncRNA:CR44682	ncRNA	2.3772	6.03953	7.06126	9.86031	8.20069	9.83663	2.17058	0.917605	2.07549	5.95192	4.42831	0	0	8	9	13	10	11	3	1	2	6	5	0	0
FBgn0031888	513.455	1.36426	0.181055	4.93551e-14	4.54666e-13	TRUE	Pvf2	protein_coding	7.53361	568.732	1177.27	1008.64	1014.69	784.071	879.522	332.136	388.904	344.616	252.118	479.105	294.777	743	1484	1330	1254	930	1182	346	388	354	293	258	262
FBgn0266072	1.01461	1.36398	0.764659	0.0621685	0.0944491	FALSE	lncRNA:CR44825	ncRNA	1.86509	1.49468	2.34325	0.763561	2.47275	0	0.718322	0	0	0	0	0	1.15505	2	3	1	3	0	1	0	0	0	0	0	1
FBgn0003357	42.1142	1.36392	0.583273	0.0209804	0.0363984	TRUE	Jon99Ciii	protein_coding	2.30834	57.3746	93.3395	100.74	102.95	68.9649	97.5799	27.6521	69.3604	25.5141	13.1113	7.81508	28.5153	89	117	135	140	90	135	30	69	31	18	4	30
FBgn0034739	682.236	1.36384	0.259279	1.44058e-07	6.67278e-07	TRUE	CG3927	protein_coding	5.26	748.681	822.604	1149.82	856.581	1164.27	1070.82	426.391	137.252	495.312	596.91	336.232	206.407	980	1039	1517	1056	1366	1447	448	136	507	690	181	183
FBgn0037123	336.947	1.36228	0.572566	0.0169589	0.0301248	TRUE	CG14569	protein_coding	2.3876	97.632	506.685	347.737	445.363	511.543	884.918	101.157	110.601	44.0852	31.2756	616.896	18.082	128	641	459	548	595	1201	107	109	45	36	332	16
FBgn0267165	4.8783	1.36218	0.518419	0.00980639	0.0185822	TRUE	lncRNA:CR45605	ncRNA	2.58258	7.05089	5.57902	16.1735	3.99939	7.7318	5.38104	3.89266	0	0	4.52401	6.25184	2.78059	11	8	26	6	11	8	5	0	0	4	2	3
FBgn0267866	2.44746	1.36199	0.618643	0.0337494	0.055287	FALSE	CR46154	pseudogene	2.12305	2.01293	7.58484	6.78867	3.4078	4.96057	2.14935	0.847587	1.05166	1.03397	3.85213	0	1.27308	3	10	8	4	5	3	1	1	1	4	0	1
FBgn0267867	2.44746	1.36199	0.618643	0.0337494	0.055287	FALSE	CR46155	pseudogene	2.12305	2.01293	7.58484	6.78867	3.4078	4.96057	2.14935	0.847587	1.05166	1.03397	3.85213	0	1.27308	3	10	8	4	5	3	1	1	1	4	0	1
FBgn0028984	6072.99	1.36142	0.11373	5.08067e-33	2.34988e-31	TRUE	Spn88Ea	protein_coding	11.9704	8961.44	12733.1	10091.2	11717.3	9987.87	9854.63	3526.16	4780.93	3413.21	3621.75	4719.11	4485.28	11716	16061	13308	14467	11798	13270	3685	4758	3502	4201	2541	3983
FBgn0038873	10.3915	1.35796	0.440182	0.00219389	0.00495051	TRUE	CG5892	protein_coding	3.06265	8.42141	23.8033	18.9602	27.5055	11.792	14.1446	10.5672	3.00519	7.78551	0	11.1416	6.74913	11	30	25	34	14	19	11	3	8	0	6	6
FBgn0065047	0.692114	1.35788	0.777231	0.11981	0.167462	FALSE	snoRNA:U3:54Ab	snoRNA	1.55557	0	5.12951	1.85598	1.84713	0	2.9051	0	0	0	0	0	0	0	7	2	2	0	4	0	0	0	0	0	0
FBgn0065048	0.692114	1.35788	0.777231	0.11981	0.167462	FALSE	snoRNA:U3:54Aa	snoRNA	1.55557	0	5.12951	1.85598	1.84713	0	2.9051	0	0	0	0	0	0	0	7	2	2	0	4	0	0	0	0	0	0
FBgn0267690	9.93959	1.35756	0.556833	0.016361	0.0291677	TRUE	CG46026	protein_coding	2.40076	8.4199	43.6314	14.4091	34.7944	9.27444	7.44077	4.79946	5.01181	2.92053	10.3259	1.857	14.6265	11	55	19	43	11	10	5	5	3	12	1	13
FBgn0266737	2.03546	1.35751	0.7339	0.0645377	0.0976214	FALSE	asRNA:CR45210	ncRNA	1.84845	3.81477	6.32541	0	2.43738	1.71705	4.42409	0	0	0	0	1.85803	3.38927	5	8	0	3	2	6	0	0	0	0	1	3
FBgn0264709	7.10572	1.3571	0.7216	0.05593	0.0861178	FALSE	lncRNA:CR43978	ncRNA	1.91158	17.5597	7.12091	12.8829	18.6713	0.855341	8.8646	0.949151	0	0	1.73316	16.7204	0	23	9	17	23	1	12	1	0	0	2	9	0
FBgn0001321	1894.51	1.35687	0.177825	2.3557e-14	2.23463e-13	TRUE	knk	protein_coding	7.62955	3013.93	4458.46	3456.25	4406.24	3123.1	2840.19	1240.32	1928.99	1387.26	1371.92	720.465	1562.02	3936	5618	4557	5448	3712	3813	1290	1927	1426	1596	388	1389
FBgn0266984	16.3803	1.35672	0.394	0.000597893	0.00152477	TRUE	lncRNA:CR45435	ncRNA	3.43257	19.064	26.0786	22.7263	12.1945	31.8549	22.8254	12.2768	1.01559	6.86071	15.6484	3.71634	7.91342	25	33	30	15	37	31	13	1	7	18	2	7
FBgn0003963	854.904	1.35406	0.172114	3.6539e-15	3.74076e-14	TRUE	ush	protein_coding	7.86626	1016.86	1703.88	1766.38	1875.76	1197.07	1447.81	581.13	846.566	439.126	524.045	467.606	624.379	1333	2157	2321	2294	1420	1934	604	832	440	605	255	546
FBgn0037584	0.958943	1.35398	0.745631	0.0931558	0.134743	FALSE	CG7963	protein_coding	1.67898	3.05573	1.5834	1.5159	2.43358	2.55746	0.739955	0	0	0	1.73034	0	1.12795	4	2	2	3	3	1	0	0	0	2	0	1
FBgn0003683	1.10525	1.35397	0.752982	0.100961	0.144536	FALSE	term	protein_coding	1.64021	3.05933	0	2.27461	4.05	3.38771	2.22718	0.956503	0	1.94988	0.8624	0	0	4	0	3	5	4	3	1	0	2	1	0	0
FBgn0011692	212.821	1.35379	0.257164	1.42166e-07	6.58902e-07	TRUE	pav	protein_coding	5.26243	163.902	485.79	430.824	361.426	310.928	313.035	98.1652	246.068	105.025	130.581	115.121	92.1889	214	612	568	447	370	420	102	246	108	152	62	82
FBgn0037165	31.1459	1.35371	0.259942	2.11723e-07	9.59103e-07	TRUE	CG11437	protein_coding	5.18874	61.0918	71.2256	49.2615	64.9255	45.2758	61.3522	19.0016	31.3298	21.5086	32.9098	16.7198	11.2848	80	90	65	80	53	83	20	31	22	38	9	10
FBgn0041195	728.275	1.35171	0.256518	1.37509e-07	6.38836e-07	TRUE	Pkd2	protein_coding	5.26855	1103.68	1207.36	1334.2	1095.57	1280.54	1166.5	605.407	161.033	540.663	799.765	285.945	349.634	1441	1521	1759	1355	1524	1565	629	161	556	931	154	311
FBgn0032668	26.9928	1.34844	0.277369	1.20662e-06	4.85289e-06	TRUE	CG17681	protein_coding	4.85455	35.167	39.6149	25.0177	25.9342	41.6001	31.1425	8.5922	23.1547	10.7328	9.49768	18.5741	6.7614	46	50	33	32	49	42	9	23	11	11	10	6
FBgn0034120	53.6687	1.34758	0.305601	1.06394e-05	3.70107e-05	TRUE	CG15710	protein_coding	4.40375	76.328	80.684	84.8688	66.5864	99.3532	97.4454	43.6156	7.08603	28.3756	57.232	18.579	33.8745	100	102	112	82	116	132	46	7	29	66	10	30
FBgn0267626	6.76469	1.34738	0.457414	0.00358039	0.00766848	TRUE	lncRNA:CR45964	ncRNA	2.91294	11.4385	3.16107	12.8783	10.5684	8.60895	16.1991	2.83322	4.06221	2.94025	7.82398	0	3.39142	15	4	17	13	10	22	3	4	3	9	0	3
FBgn0031388	305.87	1.34727	0.251988	9.02911e-08	4.30211e-07	TRUE	CG12674	protein_coding	5.34525	433.251	436.508	552.719	427.937	577.954	446.193	197.468	71.5734	262.654	314.558	129.95	122.792	567	551	729	528	680	602	207	71	269	364	70	109
FBgn0267917	2.19868	1.34631	0.756462	0.0755591	0.112134	FALSE	lncRNA:CR46198	ncRNA	1.77706	5.31513	1.57464	5.29998	0.81661	4.39156	0.729191	3.72031	0	0	0	0	0	7	2	7	1	5	1	4	0	0	0	0	0
FBgn0262790	141.175	1.34342	0.16455	3.29161e-16	3.702e-15	TRUE	CG43171	protein_coding	8.16213	193.613	186.949	190.735	192.273	231.005	189.714	81.5171	44.6619	76.307	100.831	95.3836	65.0882	225	213	236	214	239	242	96	45	98	135	51	70
FBgn0262807	141.175	1.34342	0.16455	3.29161e-16	3.702e-15	TRUE	CG43178	protein_coding	8.16213	193.613	186.949	190.735	192.273	231.005	189.714	81.5171	44.6619	76.307	100.831	95.3836	65.0882	225	213	236	214	239	242	96	45	98	135	51	70
FBgn0263496	46.3228	1.3433	0.224277	2.20567e-09	1.28279e-08	TRUE	lncRNA:CR43485	ncRNA	5.98189	73.9545	60.3997	75.1067	55.7776	66.24	57.8594	27.5082	12.4591	27.7839	38.101	27.8529	16.0131	98	77	99	68	74	80	30	12	28	43	15	14
FBgn0038073	1135.92	1.34309	0.332554	5.48839e-05	0.000169666	TRUE	CG14395	protein_coding	4.03379	2304.55	2488.68	2169.44	3203.01	1432.58	2154.09	2122.84	1107.88	483.804	560.776	336.948	580.99	3072	3171	2898	4010	1713	2910	2228	1113	494	638	179	517
FBgn0032026	1189.33	1.34259	0.13387	1.14202e-23	2.40285e-22	TRUE	CG7627	protein_coding	10.0285	1450.18	2503.21	1904.15	2171.6	1504.73	1632.47	721.24	821.104	685.258	601.667	725.589	821.097	1891	3156	2509	2690	1797	2183	751	820	707	706	390	730
FBgn0263656	6.05093	1.34237	0.539504	0.0128045	0.0235	TRUE	CG43647	protein_coding	2.48916	3.00564	3.91405	7.60569	4.93324	1.80773	5.04446	0	0	1.99066	4.45245	0	1.14887	4	5	10	6	2	7	0	0	2	5	0	1
FBgn0039200	53.3869	1.34085	0.437478	0.00232177	0.005206	TRUE	CG13616	protein_coding	3.04565	187.449	97.926	111.351	89.5104	139.913	41.1744	15.0704	84.4709	27.4701	53.1215	3.71773	58.8415	246	124	147	110	162	56	16	83	28	61	2	52
FBgn0267579	0.606806	1.34069	0.802005	0.122008	0.169805	FALSE	lncRNA:CR45919	ncRNA	1.5464	0	3.18615	1.0145	2.70179	0.560516	1.99607	0	0	0	0	0	0.75133	0	6	2	5	1	4	0	0	0	0	0	1
FBgn0262033	45.6462	1.34026	0.304962	1.11184e-05	3.85396e-05	TRUE	lncRNA:CR42844	ncRNA	4.3942	49.1695	49.482	46.9861	58.968	40.0234	63.0865	23.0334	4.13971	33.6686	28.2637	18.5778	7.98617	65	63	62	72	45	87	25	4	34	32	10	7
FBgn0034869	64.1081	1.33996	0.275327	1.174e-06	4.72895e-06	TRUE	CG13558	protein_coding	4.85998	105.415	106.871	122.785	82.7494	118.546	117.628	52.3218	18.1727	29.3142	83.0734	27.865	37.2261	138	135	162	102	139	159	55	18	30	96	15	33
FBgn0010039	1080.84	1.33859	0.123658	2.65999e-27	7.58825e-26	TRUE	GstD3	protein_coding	10.8236	1677.39	2310.94	2063.2	2490.22	1849.18	1906.91	851.611	939.245	812.366	845.458	678.297	702.545	2201	2926	2724	3061	2141	2594	904	923	828	971	365	621
FBgn0035996	120.126	1.33809	0.173169	1.14913e-14	1.11788e-13	TRUE	CG3448	protein_coding	7.72156	129.08	246.17	212.973	238.547	201.399	198.942	82.723	85.8494	90.8926	83.099	57.5888	75.591	169	311	281	294	236	269	87	85	93	96	31	67
FBgn0030927	248.986	1.33791	0.157268	1.83002e-17	2.31088e-16	TRUE	CG15046	protein_coding	8.50411	292.32	571.015	509.587	441.154	385.904	437.178	193.663	188.627	162.658	136.922	189.424	165.451	382	720	672	545	457	588	202	188	167	159	102	147
FBgn0261016	128.156	1.33568	0.243899	4.39311e-08	2.1851e-07	TRUE	clos	protein_coding	5.47427	159.376	235.061	241.229	236.775	155.923	191.785	79.0702	59.924	64.1302	61.7795	154.101	61.7988	208	296	318	293	186	257	82	60	66	72	83	55
FBgn0030566	119.465	1.33381	0.2521	1.23944e-07	5.7978e-07	TRUE	betaNACtes4	protein_coding	5.28758	166.493	147.215	231.915	167.973	231.37	208.51	76.0409	24.2466	76.2434	131.602	70.5936	66.5718	218	186	306	207	271	282	80	24	78	152	38	59
FBgn0264719	2.0016	1.33333	0.718858	0.0671316	0.100978	FALSE	lncRNA:CR43987	ncRNA	1.83079	0.759941	0	2.27138	6.52767	4.37679	2.19105	0.932458	1.02585	0	1.7528	0	0	1	0	3	8	5	3	1	1	0	2	0	0
FBgn0035343	230.117	1.33248	0.513709	0.00949342	0.0180696	TRUE	CG16762	protein_coding	2.59375	270.909	375.657	130.327	311.086	465.597	621.97	120.311	48.6245	45.0261	19.9556	503.509	33.8832	355	475	172	383	543	843	127	48	46	23	271	30
FBgn0262604	2.10392	1.3313	0.710913	0.0591614	0.0904372	FALSE	lncRNA:CR43130	ncRNA	1.88699	4.84216	2.34903	1.75565	0.8805	2.05118	0.740075	0	0	0	2.98708	0	0	7	3	2	1	2	1	0	0	0	3	0	0
FBgn0266147	11.8072	1.33102	0.445807	0.00304228	0.00663503	TRUE	lncRNA:CR44853	ncRNA	2.96343	15.939	13.381	23.4728	13.8869	24.6285	28.4199	11.1485	1.02871	3.94715	19.3263	1.85859	4.54674	21	17	31	17	28	39	12	1	4	22	1	4
FBgn0037222	280.753	1.33073	0.185682	7.73081e-13	6.33748e-12	TRUE	CG14642	protein_coding	7.16585	318.613	381.881	408.339	413.816	363.724	323.257	142.9	85.5513	199.638	210.19	98.5637	124.071	421	485	542	514	431	438	150	86	206	245	53	110
FBgn0052302	6.36616	1.3303	0.655502	0.047583	0.0745804	FALSE	CG32302	protein_coding	1.98107	3.81983	7.1256	18.1911	18.6564	6.81824	20.7212	6.6626	3.02752	4.88466	0	9.28815	1.12789	5	9	24	23	8	28	7	3	5	0	5	1
FBgn0039644	1869.17	1.32991	0.210046	2.43151e-10	1.57269e-09	TRUE	rdog	protein_coding	6.33127	1470.36	3734.18	3502.6	3598.72	2675.22	2644.35	1118.77	1207.9	908.856	843.958	1735.04	1091.08	1926	4744	4638	4461	3202	3547	1162	1209	932	976	933	968
FBgn0267148	2.92019	1.32844	0.679681	0.0489406	0.0764324	FALSE	lncRNA:CR45588	ncRNA	1.96911	0	0.786939	3.78606	4.90267	4.40333	2.1849	1.85635	1.02942	0	0.87898	0	0	0	1	5	6	5	3	2	1	0	1	0	0
FBgn0039237	94.5731	1.32826	0.473925	0.0054473	0.0111041	TRUE	CG13640	protein_coding	2.77932	270.109	234.091	144.734	194.891	142.218	219.777	45.1672	255.536	54.4538	23.8401	14.8628	44.4846	357	298	191	238	160	303	49	247	55	27	8	39
FBgn0030159	3266.9	1.32761	0.253098	1.57445e-07	7.25203e-07	TRUE	CG9689	protein_coding	5.24363	4834.27	7290.13	6471.96	8993.12	5059.73	5658.46	2969.67	3639.71	2467.13	2111.62	956.279	2756.63	7245	10292	8834	11805	6188	8338	3251	3702	2423	2434	481	2388
FBgn0267741	0.615642	1.32699	0.804828	0.104352	0.1486	FALSE	CR46072	pseudogene	1.62411	1.38674	1.52919	0	1.68523	2.92596	0	0	0	0	0	0	0	2	2	0	2	3	0	0	0	0	0	0	0
FBgn0262105	19.6147	1.3262	0.474399	0.00538205	0.0109826	TRUE	lncRNA:CR42858	ncRNA	2.78323	33.4987	22.0933	28.7751	35.8357	39.9321	34.465	16.8913	3.06225	13.7579	21.8217	1.85852	11.3267	44	28	38	44	46	47	18	3	14	25	1	10
FBgn0034647	308.398	1.32589	0.696871			FALSE	pirk	protein_coding	1.85017	139.822	884.969	772.303	797.765	611.859	713.251	19.7315	1047.01	15.2011	16.0549	76.76	17.2544	178	1092	1000	962	706	941	20	1009	17	18	40	18
FBgn0038773	288.781	1.3254	0.231625	1.06147e-08	5.68482e-08	TRUE	CG10887	protein_coding	5.7206	396.532	443.489	552.865	428.818	481.216	501.619	197.806	77.1606	229.715	299.387	176.412	114.75	518	559	729	530	571	674	206	77	236	348	95	102
FBgn0038783	0.5652	1.32502	0.778355	0.131396	0.180916	FALSE	CG4367	protein_coding	1.50862	2.4855	0.858585	0.822822	4.40572	0	1.60098	0	0	0	0	0	0	3	1	1	6	0	2	0	0	0	0	0	0
FBgn0033787	1234.57	1.32345	0.281771	2.64261e-06	1.0123e-05	TRUE	CG13321	protein_coding	4.69681	724.111	2099.34	2070.28	2321.9	1908.32	2017.07	642.55	652.51	552.347	432.159	1451.03	597.093	962	2684	2782	2907	2263	2764	692	632	557	488	779	529
FBgn0052274	0.654286	1.32276	0.801525	0.135268	0.185608	FALSE	Drsl1	protein_coding	1.49365	0	1.46557	4.63994	1.84713	2.06454	0.726275	0	0	1.03367	0	0	0	0	2	5	2	2	1	0	0	1	0	0	0
FBgn0266884	14.8445	1.32128	0.345995	0.000138843	0.000402324	TRUE	lncRNA:CR45345	ncRNA	3.81022	18.3776	18.2529	12.8936	16.9844	16.8269	22.3462	12.4995	5.00513	0	5.15756	12.9981	6.74739	24	23	17	21	20	30	13	5	0	6	7	6
FBgn0035445	60.1578	1.32109	0.231007	1.12645e-08	5.99381e-08	TRUE	Ids	protein_coding	5.7105	114.758	126.861	86.4421	109.31	82.8658	106.991	38.3084	66.2762	34.105	18.0961	48.2866	43.9087	150	160	114	135	98	144	40	66	35	21	26	39
FBgn0033582	31.8983	1.3208	0.350221	0.000164986	0.000473688	TRUE	CG9084	protein_coding	3.76736	25.6653	60.5413	38.293	58.3447	28.9581	48.3978	31.2941	15.643	13.7712	16.1064	17.2347	4.65456	36	77	52	73	35	67	32	15	15	19	9	4
FBgn0035787	14.9789	1.32003	0.387813	0.000661453	0.00167133	TRUE	CG8543	protein_coding	3.40508	9.15089	11.0639	9.09058	26.0142	18.0778	16.9359	2.83334	4.06208	2.9402	9.56239	11.149	4.52184	12	14	12	32	21	23	3	4	3	11	6	4
FBgn0031461	725.11	1.31957	0.21984	1.957e-09	1.14755e-08	TRUE	daw	protein_coding	6.00134	1023.07	1697.14	1220.59	1408.79	1029.51	1260.22	457.379	516.338	348.499	311.778	934.186	449.968	1336	2123	1595	1721	1232	1693	484	512	352	360	501	404
FBgn0023129	3033.53	1.31905	0.254657	2.22582e-07	1.00364e-06	TRUE	aay	protein_coding	5.17942	5665.74	4814.3	4328.72	5235.9	3596.35	5133.78	1773.27	1360.5	1290.56	1175.95	4323.64	1346.84	7407	6073	5709	6465	4249	6913	1853	1354	1324	1364	2328	1196
FBgn0266639	3.28593	1.3186	0.638457	0.0409943	0.0654075	FALSE	asRNA:CR45146	ncRNA	2.04359	3.81385	0.790482	3.78802	13.0029	2.57882	2.94749	0.9455	2.02919	0.979625	1.73741	0	2.26017	5	1	5	16	3	4	1	2	1	2	0	2
FBgn0051869	690.861	1.31845	0.262634	5.19405e-07	2.21491e-06	TRUE	CG31869	protein_coding	5.019	970.372	1578.51	1407.85	1143.2	809.18	1200.36	431.169	643.873	263.775	274.599	838.883	333.568	1265	1996	1860	1424	968	1621	452	641	270	318	448	292
FBgn0266633	4.99823	1.31818	0.529159	0.0129852	0.023798	TRUE	asRNA:CR45140	ncRNA	2.48418	5.36975	11.1296	0.889036	6.67793	4.04021	7.77809	2.89696	0.767274	3.45032	0.65776	1.41284	3.97978	6	12	1	7	4	9	4	1	3	1	1	3
FBgn0031469	79.589	1.31731	0.324189	4.93858e-05	0.000153825	TRUE	CG18558	protein_coding	4.05851	94.1236	115.789	160.004	114.943	161.29	162.081	56.5638	10.0335	74.9985	93.005	42.7132	32.6401	123	146	211	142	191	218	59	10	77	108	23	29
FBgn0267705	70.8882	1.31706	0.165479	1.88978e-15	1.98675e-14	TRUE	asRNA:CR46038	ncRNA	7.94837	114.021	130.858	150.147	137.606	90.3508	120.449	50.814	52.1722	59.4133	44.7789	37.1419	48.3967	149	165	198	170	107	162	53	52	61	52	20	43
FBgn0038440	2.17154	1.31693	0.702185	0.0724647	0.108044	FALSE	Gr89a	protein_coding	1.79619	1.528	7.12591	5.30579	4.86663	3.40832	2.96053	3.8079	0	0	0	1.85762	2.25567	2	9	7	6	4	4	4	0	0	0	1	2
FBgn0028494	7347.87	1.31619	0.156975	5.09196e-17	6.16596e-16	TRUE	CG6424	protein_coding	8.38455	7756.08	14249.4	12743.9	15026.3	10196.9	11407.7	4626.46	4385.36	3991.79	3720.11	6660.44	5041.06	10099	18351	16917	18488	12105	15173	4846	4448	4027	4336	3545	4490
FBgn0058354	17.0799	1.31592	0.401209	0.00105162	0.00254175	TRUE	CR40354	pseudogene	3.27634	19.8828	22.9834	18.9543	22.6841	25.4282	29.6837	10.5149	5.02852	0	12.9411	22.2878	4.50594	26	29	25	28	30	40	11	5	0	15	12	4
FBgn0085249	289.236	1.31579	0.659699	0.0416737	0.0663494	FALSE	CG34220	protein_coding	2.03676	70.4363	189.64	237.384	227.314	170.105	766.87	77.8258	160.255	77.8497	59.3384	57.5647	75.3616	92	239	313	281	202	1030	81	160	80	69	31	67
FBgn0035570	0.771266	1.31571	0.79982	0.102373	0.146195	FALSE	CG13712	protein_coding	1.63346	1.52271	0.789067	0	1.62882	1.73586	2.93343	0	0	0.982646	0	0	0	2	1	0	2	2	4	0	0	1	0	0	0
FBgn0033659	93.7074	1.315	0.452391	0.00356898	0.00764823	TRUE	Damm	protein_coding	2.91394	26.2024	90.8786	150.307	169.54	77.2204	167.763	32.0186	17.9026	25.8681	25.7993	133.595	19.9288	34	113	203	211	85	235	38	17	27	29	75	17
FBgn0033850	14.7599	1.31274	0.353675	0.000211388	0.000594678	TRUE	CG13331	protein_coding	3.705	19.1185	15.8511	15.9218	23.4935	21.1871	7.42148	11.4721	3.01683	6.82602	1.72535	11.1439	6.75868	25	20	21	29	25	10	12	3	7	2	6	6
FBgn0040801	814.905	1.31247	0.599374	0.0345859	0.056468	FALSE	CG13053	protein_coding	2.11317	1480.14	2339.25	996.099	2066.44	1458.43	2504.18	521.896	2703.93	175.359	133.504	57.5823	192.459	1638	2414	1107	2080	1317	2751	491	2234	144	121	29	140
FBgn0086916	265.149	1.31113	0.202234	9.08825e-11	6.13722e-10	TRUE	snky	protein_coding	6.48139	421.042	407.801	506.608	399.674	464.275	384.065	202.637	81.1594	191.742	267.531	159.699	120.37	550	514	668	494	551	516	211	81	197	311	86	107
FBgn0066365	3885.54	1.31113	0.391809	0.000841092	0.00207985	TRUE	dyl	protein_coding	3.33891	9614.62	8231.95	7971.39	8552.9	6095.1	6490.15	3809.88	4831.16	2155.94	3263.62	272.643	3501.66	12530	10420	10580	10618	7250	8701	3945	4791	2171	3735	147	3096
FBgn0051116	2675.89	1.31112	0.341041			FALSE	ClC-a	protein_coding	3.84617	3077.51	3502.53	3105.03	4063.06	2786.43	3176.09	1074.11	911.076	618.868	513.656	3703.92	778.703	3977	4361	4040	4943	3281	4238	1110	892	617	585	2037	689
FBgn0284227	65.4543	1.31077	0.433895	0.00252473	0.00560242	TRUE	CG46311	protein_coding	3.02036	98.039	99.2262	157.768	55.7875	77.2932	89.4496	48.1294	0	26.2541	47.2442	51.9897	42.7193	128	125	208	69	92	120	50	0	27	55	28	38
FBgn0266950	0.63859	1.31041	0.793906	0.119933	0.167612	FALSE	lncRNA:CR45401	ncRNA	1.55506	0	1.56216	0	0.824251	5.47674	1.43664	0	0	0	0	0	0	0	2	0	1	6	2	0	0	0	0	0	0
FBgn0029590	22.4247	1.31012	0.28309	3.98258e-06	1.48662e-05	TRUE	CG14811	protein_coding	4.61229	32.0423	37.9502	42.4277	35.7508	27.4815	36.8616	14.1929	4.056	10.7725	22.5757	13.0064	18.0774	42	48	56	44	32	50	15	4	11	26	7	16
FBgn0266251	10.1366	1.30945	0.477615	0.00578344	0.011705	TRUE	lncRNA:CR44946	ncRNA	2.75981	2.29607	7.13882	9.10016	9.71154	2.53107	5.95063	0	4.01112	1.94744	1.72155	0	4.50115	3	9	12	12	3	8	0	4	2	2	0	4
FBgn0031719	5.0907	1.30943	0.51573	0.0124794	0.02296	TRUE	CG18269	protein_coding	2.49829	5.34314	11.8657	6.81988	12.9919	11.9887	3.69146	2.8449	0	5.87047	3.46829	1.85789	4.51641	7	15	9	16	14	5	3	0	6	4	1	4
FBgn0029931	0.613507	1.30798	0.804314	0.125174	0.173665	FALSE	CG14427	protein_coding	1.53341	0.764227	1.58402	0	3.24322	0.850667	2.22225	0	0	0.976333	0	0	0	1	2	0	4	1	3	0	0	1	0	0	0
FBgn0031512	0.582104	1.30623	0.774389	0.135754	0.186162	FALSE	CG15404	protein_coding	1.49179	1.74778	1.82829	0.637755	0	5.42347	0.840573	0	0	0	0	0	0	2	2	1	0	6	1	0	0	0	0	0	0
FBgn0040305	907.191	1.30554	0.147152	7.21767e-19	1.0267e-17	TRUE	MTF-1	protein_coding	8.87149	1217.18	1793	1401.58	1727.5	1135.88	1336.52	582.803	682.617	461.333	471.184	613.551	648.758	1597	2317	1822	2064	1377	1778	609	690	470	547	333	588
FBgn0037516	312.098	1.30529	0.200319	7.23061e-11	4.92317e-10	TRUE	CG11286	protein_coding	6.51579	365.582	330.291	411.462	405.433	423.985	403.95	154.916	89.4973	192.729	243.038	122.794	126.086	479	417	539	498	491	544	166	89	199	280	68	113
FBgn0267582	10.0218	1.30247	0.405084	0.0014114	0.00331496	TRUE	lncRNA:CR45922	ncRNA	3.19231	15.9336	7.86939	24.988	14.708	14.9713	13.1094	8.35357	4.11769	4.93584	12.3057	1.85856	1.13711	21	10	33	18	17	18	9	4	5	14	1	1
FBgn0004635	626.159	1.30231	0.137397	2.61584e-21	4.59993e-20	TRUE	rho	protein_coding	9.47705	859.096	1507.99	1277.18	1064.91	862.686	959.873	422.882	468.688	452.073	422.181	353.646	507.141	1109	1914	1667	1321	1030	1288	431	458	458	484	186	440
FBgn0265646	1.00008	1.30216	0.796726	0.0943014	0.136174	FALSE	lncRNA:CR44453	ncRNA	1.67313	1.51737	0	0.757221	0	3.52376	2.91278	0	0	0	0.879123	0	0	2	0	1	0	4	4	0	0	0	1	0	0
FBgn0266834	1.37032	1.30211	0.760792	0.0909386	0.13189	FALSE	lncRNA:CR45296	ncRNA	1.69047	2.26833	1.57046	3.03186	2.45781	0	4.34846	0	0	1.98129	0	1.85763	0	3	2	4	3	0	6	0	0	2	0	1	0
FBgn0267042	282.477	1.30201	0.285502	5.10375e-06	1.87381e-05	TRUE	CG45486	protein_coding	4.56048	387.252	380.095	324.822	462.127	434.568	267.965	198.453	56.2514	125.913	272.761	152.407	80.4835	509	482	429	567	499	366	212	55	128	312	82	71
FBgn0265917	0.690113	1.30144	0.793679	0.118695	0.16619	FALSE	CR44706	pseudogene	1.56028	2.9355	0	3.10397	3.31786	0	0	0	0	0	0	0	0	4	0	4	4	0	0	0	0	0	0	0	0
FBgn0028990	2952.92	1.301	0.151453	8.71586e-18	1.14212e-16	TRUE	Spn27A	protein_coding	8.58975	4560.61	6171.39	4733.8	5480.13	4358.4	5218.17	2244.81	2911.45	1595.6	1470.25	2052.46	2014.54	5936	7772	6179	6760	5109	6976	2348	2886	1648	1697	1116	1798
FBgn0029507	1078.78	1.30071	0.121526	9.90727e-27	2.67496e-25	TRUE	Tsp42Ed	protein_coding	10.7025	1643.74	1908.32	1516.79	1989.83	1344.96	1801.96	674.265	887.382	612.947	609.692	692.735	645.468	2176	2416	2004	2447	1562	2462	709	871	618	695	369	566
FBgn0036390	2.05381	1.30016	0.644339	0.0499781	0.0779162	FALSE	CG13738	protein_coding	1.96015	2.92946	3.87882	3.11043	2.48984	3.74707	1.42845	0	2.10966	1.00765	0.909074	1.83479	0	4	5	4	3	4	2	0	2	1	1	1	0
FBgn0051131	2.95262	1.29917	0.559909	0.0238503	0.0406688	TRUE	CG31131	protein_coding	2.25953	6.11504	6.33736	3.03231	4.86361	4.24861	4.44698	1.90807	0	1.95196	5.18277	0	0	8	8	4	6	5	6	2	0	2	6	0	0
FBgn0051253	2.95262	1.29917	0.559909	0.0238503	0.0406688	TRUE	CG31253	protein_coding	2.25953	6.11504	6.33736	3.03231	4.86361	4.24861	4.44698	1.90807	0	1.95196	5.18277	0	0	8	8	4	6	5	6	2	0	2	6	0	0
FBgn0052182	31.2953	1.29899	0.29281	9.80848e-06	3.43572e-05	TRUE	CG32182	protein_coding	4.42135	46.6522	62.6157	62.1717	65.6144	37.2761	69.7743	28.6883	37.1994	14.6255	18.1131	13.001	22.5271	61	79	82	81	44	94	30	37	15	21	7	20
FBgn0265527	8.35252	1.29897	0.422219	0.0022266	0.00501707	TRUE	lncRNA:CR44377	ncRNA	3.05821	6.12455	13.4883	15.1681	11.3261	7.58136	10.4218	1.92114	3.00539	1.94644	7.74101	1.85694	6.74929	8	17	20	14	9	14	2	3	2	9	1	6
FBgn0035763	6554.3	1.29839	0.16849	1.29953e-14	1.25719e-13	TRUE	mrva	protein_coding	7.70587	16519.1	10398.8	8636.33	9582.3	6978.59	9836.02	3999.82	4847.9	4104.79	3517.99	3403.67	5059.78	21574	13104	11387	11847	8292	13207	4161	4842	4219	4092	1833	4499
FBgn0037531	50.2216	1.2981	0.19834	6.37976e-11	4.36667e-10	TRUE	CG10445	protein_coding	6.53456	78.8984	90.1766	67.1761	94.4749	66.6921	77.4046	25.8489	49.4396	24.8273	35.4136	39.3251	15.8049	107	118	89	119	78	100	27	50	23	41	22	13
FBgn0028887	411.46	1.29783	0.220965	4.30453e-09	2.42409e-08	TRUE	CG3491	protein_coding	5.87204	596.906	735.378	820.789	707.071	766.103	528.376	300.883	127.828	315.779	471.039	258.071	184.267	779	926	1082	875	914	708	312	128	325	549	139	164
FBgn0052457	29.3717	1.29654	0.641611	0.0447307	0.0706339	FALSE	CG32457	protein_coding	2.00718	3.72593	22.4011	62.3292	48.755	101.225	79.5429	0	12.2972	2.89469	11.1528	72.8636	7.78218	5	29	84	61	117	111	0	10	3	13	40	7
FBgn0041236	1.15902	1.29601	0.77789	0.0845418	0.123749	FALSE	Gr59d	protein_coding	1.72492	3.05697	1.58405	2.27412	3.24313	0.850569	0	0	0	0	0	1.85752	1.12738	4	2	3	4	1	0	0	0	0	0	1	1
FBgn0265994	1.07985	1.29538	0.800813	0.109069	0.15439	FALSE	lncRNA:CR44769	ncRNA	1.60239	0.741286	3.89392	0	0	6.46637	1.43211	0.896062	0	0	0	0	0	1	5	0	0	7	2	1	0	0	0	0	0
FBgn0261260	3863.47	1.29507	0.18354	1.71716e-12	1.36682e-11	TRUE	mgl	protein_coding	7.05571	5558.27	8740.51	6382.91	8551.42	4867.27	5646.25	2836.81	3864.9	1921.64	2077.01	2688.45	2617.45	7253	11003	8413	10588	5818	7559	2936	3874	1978	2423	1448	2330
FBgn0259196	101.631	1.29349	0.250716	2.52732e-07	1.13046e-06	TRUE	CG42300	protein_coding	5.15567	123.426	153.18	208.273	139.97	178.173	152.801	79.9873	23.4247	71.6535	99.3282	44.6018	58.8477	162	194	275	172	206	208	85	23	73	114	24	52
FBgn0267079	1.29291	1.29303	0.802083	0.0837935	0.122803	FALSE	lncRNA:CR45523	ncRNA	1.72909	0	1.73615	0	2.954	2.85146	2.6786	0	0	0	0	1.68851	0	0	2	0	4	3	4	0	0	0	0	1	0
FBgn0085193	28.0364	1.29277	0.432241	0.00276349	0.00608303	TRUE	CG34164	protein_coding	2.99289	23.3141	53.2082	64.613	37.7732	36.3152	22.0211	28.8313	13.8608	12.2797	3.30046	13.2735	20.3126	42	56	45	59	31	37	18	9	12	9	11	18
FBgn0029831	1137.84	1.29216	0.300729	1.73347e-05	5.80285e-05	TRUE	CG5966	protein_coding	4.29672	1467	2097.11	1394.06	2105.77	1452.54	1512.93	589.576	779.353	597.586	526.807	803.975	664.255	1957	2709	1907	2663	1757	2058	617	763	603	604	429	580
FBgn0035167	5.21485	1.29199	0.440054	0.00377174	0.00803428	TRUE	Gr61a	protein_coding	2.89665	5.49895	8.03011	8.5894	7.48273	8.70792	8.39206	3.37247	6.01097	3.00603	0	3.26543	2.31883	7	11	11	9	10	11	4	6	3	0	2	2
FBgn0052507	13.1924	1.29145	0.39218	0.00104417	0.00252538	TRUE	CG32507	protein_coding	3.27835	11.4556	11.0804	27.2839	12.9839	23.9095	31.7914	7.60307	1.01038	14.663	8.65874	9.28867	4.51352	15	14	36	16	28	43	8	1	15	10	5	4
FBgn0052984	33.0853	1.29138	0.475229	0.0053659	0.0109582	TRUE	CG32984	protein_coding	2.78421	9.18425	6.3456	3.79173	8.09297	16.0303	5.95059	1.91876	1.00279	0.973723	6.88623	5.57113	1.12529	12	8	5	10	19	8	2	1	1	8	3	1
FBgn0031296	241.706	1.28928	0.196807	5.76953e-11	3.96462e-10	TRUE	CG4415	protein_coding	6.54959	353.888	310.801	379.675	329.928	398.593	380.886	163.414	72.9738	171.906	223.941	138.384	95.6836	463	395	502	410	470	517	170	72	175	262	74	85
FBgn0038660	1110.84	1.28916	0.277664	3.4884e-06	1.31344e-05	TRUE	CG14291	protein_coding	4.63974	3504.23	2334.96	1874.58	2174.84	1655.36	1794.37	1090.37	1385.31	764.504	785.234	308.274	971.243	4579	2944	2472	2687	1961	2413	1137	1381	785	912	166	863
FBgn0267952	0.797603	1.28878	0.794654	0.123265	0.171259	FALSE	CR46232	pseudogene	1.54121	0	2.37694	1.51623	0.81042	3.39551	2.2246	0.95478	0	0.975667	0	0	0	0	3	2	1	4	3	1	0	1	0	0	0
FBgn0037078	5.81247	1.28779	0.522673	0.0141936	0.0257053	TRUE	CG12971	protein_coding	2.45233	0.800671	11.02	9.54042	2.55702	8.10075	11.1196	3.97479	0.921369	2.67334	2.36842	1.94955	3.55563	1	14	12	3	9	16	4	1	3	3	1	3
FBgn0265075	0.956291	1.2874	0.793524	0.106383	0.151012	FALSE	lncRNA:CR44186	ncRNA	1.61466	1.51267	4.71227	0	2.45725	0	1.45002	0	0	0	0	0	0	2	6	0	3	0	2	0	0	0	0	0	0
FBgn0051004	1287.02	1.28664	0.263228	1.0167e-06	4.15315e-06	TRUE	mesh	protein_coding	4.88838	767.045	2585.27	1746.21	2073.92	1405.62	1638.8	674.973	550.037	521.502	544.359	1165.85	632.501	1001	3258	2301	2559	1678	2200	700	551	537	634	627	563
FBgn0267751	34.8262	1.28617	0.23337	3.71962e-08	1.86195e-07	TRUE	asRNA:CR46082	ncRNA	5.50367	59.7242	44.4394	40.1972	40.4418	58.9116	39.4724	13.4578	10.0121	17.5127	23.2124	35.2808	19.1189	78	56	53	50	70	53	14	10	18	27	19	17
FBgn0051933	468.549	1.28589	0.230153	2.32543e-08	1.19466e-07	TRUE	CG31933	protein_coding	5.58586	685.065	683.02	976.779	729.886	829.7	795.389	364.738	146.352	416.672	487.057	271.123	202.524	895	861	1288	902	984	1069	380	146	428	566	146	180
FBgn0033788	203.331	1.28446	0.333405	0.000115646	0.00033913	TRUE	CG13323	protein_coding	3.85518	99.8264	247.79	259.565	355.015	222.939	287.641	80.3479	84.3844	59.0481	58.092	210.436	93.2141	137	320	346	431	250	407	87	83	61	71	109	78
FBgn0038047	16.7001	1.28357	0.29026	1.0671e-05	3.70874e-05	TRUE	CG5245	protein_coding	4.40311	30.6014	34.0932	19.7148	19.4334	17.7589	24.5174	9.57627	13.0553	8.77017	14.65	3.71437	5.62946	40	43	26	24	21	33	10	13	9	17	2	5
FBgn0053923	0.633061	1.28149	0.777078	0.136525	0.187137	FALSE	CG33923	protein_coding	1.48886	2.27395	0	3.78686	1.63554	2.65122	0	0	0	0	0	0	0	3	0	5	2	3	0	0	0	0	0	0	0
FBgn0011703	348.012	1.2809	0.236791	6.34029e-08	3.09067e-07	TRUE	RnrL	protein_coding	5.40893	346.094	626.914	511.946	630.081	489.804	490.056	173.031	329.397	157.614	132.396	300.815	159.699	452	790	675	779	582	658	180	329	162	154	162	142
FBgn0033154	34655.5	1.28015	0.556929	0.0248705	0.0422196	TRUE	CG1850	protein_coding	2.24341	22954.8	104338	99316.4	75963.3	84168.8	68063.5	17843.1	99079.3	15394.5	13650.9	4087.08	16327.4	29982	131494	130952	93905	99956	91415	18570	98925	15820	15874	2201	14516
FBgn0030756	9.94543	1.28008	0.514752	0.0140134	0.0254232	TRUE	CG9903	protein_coding	2.45692	3.06017	32.5077	25.7809	17.0041	11.8388	22.289	5.74595	11.0465	2.92335	6.89398	7.42872	7.88117	4	41	34	21	14	30	6	11	3	8	4	7
FBgn0053222	67.3258	1.27914	0.276697	3.86867e-06	1.44721e-05	TRUE	CR33222	pseudogene	4.61832	99.3168	67.6402	120.415	103.023	95.381	145.474	50.0156	16.4964	53.3542	58.0924	33.4514	39.834	131	86	159	126	108	200	54	16	54	66	18	35
FBgn0039474	8.50345	1.27816	0.801332	0.0538584	0.0832973	FALSE	CG6283	protein_coding	1.92797	0.76398	0.791747	9.09557	16.2226	2.5566	10.3611	0.951871	2.01823	0	1.73005	0	0	1	1	12	20	3	14	1	2	0	2	0	0
FBgn0029980	480.201	1.27761	0.176757	4.93406e-13	4.12703e-12	TRUE	CG10778	protein_coding	7.2271	463.499	846.751	958.511	872.29	710.673	772.682	289.087	400.907	280.005	216.328	411.774	294.989	607	1070	1266	1078	839	1043	303	399	285	251	222	261
FBgn0031654	0.49804	1.27649	0.797643	0.134127	0.184141	FALSE	Jon25Bii	protein_coding	1.49802	0.767161	0	2.28517	3.26618	0.86203	0.741698	0	0	0	0	0	0	1	0	3	4	1	1	0	0	0	0	0	0
FBgn0267091	1.63594	1.27504	0.753451	0.108018	0.153068	FALSE	asRNA:CR45535	ncRNA	1.60717	4.58886	3.96313	2.27459	3.24011	0	5.19634	3.82555	0	0	0	1.85728	0	6	5	3	4	0	7	4	0	0	0	1	0
FBgn0036810	0.796614	1.27497	0.803802	0.141539	0.192977	FALSE	CG6885	protein_coding	1.47008	1.52868	3.16852	0.758067	1.6213	4.24979	0	0	0	1.95214	0	0	0	2	4	1	2	5	0	0	0	2	0	0	0
FBgn0033447	401.546	1.27457	0.217663	4.77786e-09	2.67044e-08	TRUE	dila	protein_coding	5.85473	588.093	598.564	718.034	557.835	616.067	638.662	314.335	107.641	307.007	388.94	210.171	179.341	768	754	951	690	732	858	326	106	315	451	113	160
FBgn0036227	1.39483	1.27363	0.797514			FALSE	CG17826	protein_coding	1.40373	0	18.2492	0	0.808987	1.68457	0	0.960653	1.00173	0	0	0	1.12485	0	23	0	1	2	0	1	1	0	0	0	1
FBgn0030390	7.66695	1.27323	0.423537	0.00312946	0.00679768	TRUE	CG15731	protein_coding	2.95473	10.6997	11.0886	14.4028	20.269	15.3082	19.2619	5.72037	14.1095	2.92876	1.72832	7.43005	4.50938	14	14	19	25	18	26	6	14	3	2	4	4
FBgn0086758	1287.65	1.27322	0.216076	3.81064e-09	2.15449e-08	TRUE	chinmo	protein_coding	5.89221	1659.09	1846.82	2271.58	1973.77	2051.64	1941.2	945.529	388.957	845.275	1402.5	609.807	587.938	1924	2391	2572	2242	2113	2224	995	580	880	1442	379	678
FBgn0029092	5900.5	1.273	0.156255	3.73969e-16	4.16697e-15	TRUE	ced-6	protein_coding	8.14671	6810.47	11469.3	10397.2	11674.2	7686.51	10030.1	3893.13	5452.95	3673.38	3010.64	3425.91	4368.47	8915	14457	13746	14400	9060	13459	4047	5503	3765	3513	1847	3905
FBgn0085223	26.1433	1.2715	0.315079	5.56149e-05	0.000171756	TRUE	CG34194	protein_coding	4.03068	24.6639	50.296	21.2443	44.6832	27.5229	49.4183	25.1289	17.8337	6.52858	12.6055	8.63706	17.8271	41	55	38	70	33	65	21	16	10	14	7	13
FBgn0015550	4.04009	1.27113	0.776822	0.124798	0.173212	FALSE	tap	protein_coding	1.53494	2.29641	23.0064	15.1676	4.85483	1.68595	5.95316	0	14.0315	0	0	0	0	3	29	20	6	2	8	0	14	0	0	0	0
FBgn0036747	69.8662	1.27098	0.266043	1.81737e-06	7.1063e-06	TRUE	CG6052	protein_coding	4.77274	100.372	109.585	125.923	105.059	115.711	97.7469	52.0612	19.9775	54.4175	74.6586	33.4197	26.9682	131	138	166	130	138	131	54	20	56	87	18	24
FBgn0039058	152.853	1.26852	0.217815	5.83334e-09	3.22806e-08	TRUE	VhaAC39-2	protein_coding	5.82147	189.569	182.994	272.151	223.722	248.948	296.478	104.951	45.3251	107.355	158.068	85.4431	73.2617	248	231	359	276	293	400	110	45	110	183	46	65
FBgn0034139	37.7236	1.26847	0.320853	7.31972e-05	0.000221676	TRUE	CG4927	protein_coding	3.96565	15.296	30.912	25.7786	50.2225	22.025	13.3616	9.56336	12.0641	8.77508	7.76245	11.1437	13.516	20	39	34	62	26	18	10	12	9	9	6	12
FBgn0265299	1.27307	1.26781	0.801208	0.109763	0.155147	FALSE	lncRNA:CR44272	ncRNA	1.59926	0	6.22161	1.54338	2.48372	1.85715	0.71527	0.892688	1.05272	0	0	0	0	0	8	2	3	2	1	1	1	0	0	0	0
FBgn0264957	3.01092	1.26707	0.624708	0.0449384	0.0709116	FALSE	lncRNA:CR44126	ncRNA	2.00523	3.05164	0	3.78819	6.50014	3.43519	5.16062	0.946191	0	0	4.34148	0	1.12984	4	0	5	8	4	7	1	0	0	5	0	1
FBgn0037164	780.674	1.26584	0.134131	3.86147e-21	6.6556e-20	TRUE	CG11438	protein_coding	9.43631	1377.76	1573.68	1169.52	1612.91	1162.51	1322.91	580.777	684.686	548.144	647.697	374.083	552.29	1571	1652	1434	1702	1289	1539	626	571	611	862	212	442
FBgn0039809	2588.72	1.2651	0.123758	1.58026e-24	3.52918e-23	TRUE	CG15547	protein_coding	10.222	4226.68	4390.73	4362.23	4768.68	3986.38	4396.36	1846.98	1340.84	1995.83	2445.06	1545.19	1633.74	5525	5538	5753	5889	4713	5918	1929	1335	2048	2837	832	1451
FBgn0262867	2552.02	1.26503	0.174599	4.3235e-13	3.65348e-12	TRUE	Ptr	protein_coding	7.24503	3506.92	5400.73	4065.05	4864.76	3400.07	3664.65	1583.35	2635.49	1418.16	1466.55	1282.67	1862.96	4569	6781	5344	6017	4066	4901	1622	2652	1452	1704	693	1669
FBgn0039808	633.236	1.26439	0.150142	3.7647e-17	4.62322e-16	TRUE	CG12071	protein_coding	8.42	1052.1	1394.34	1033	1353.12	781.691	1039.79	455.713	535.584	436.817	411.766	384.373	521.81	1374	1757	1362	1673	929	1396	474	535	449	479	207	464
FBgn0030377	212.458	1.2627	0.204461	6.6625e-10	4.1022e-09	TRUE	CG1924	protein_coding	6.1739	362.084	307.824	403.462	260.528	327.835	318.535	158.436	64.1336	151.846	213.357	122.56	100.125	473	388	532	322	389	428	165	64	156	248	66	89
FBgn0267085	1.60396	1.26055	0.686142	0.0819438	0.120483	FALSE	lncRNA:CR45529	ncRNA	1.73952	1.51406	3.14316	3.03051	1.63712	7.98669	1.45166	1.84577	0	0.989556	2.64678	0	0	2	4	4	2	9	2	2	0	1	3	0	0
FBgn0259730	838.155	1.26038	0.258107	1.06075e-06	4.30882e-06	TRUE	tal-1A	protein_coding	4.88002	1977.35	2085.74	1492.2	2021.42	1232.22	1362.05	947.484	1181.57	491.252	650.877	260.012	612.592	2585	2631	1968	2496	1456	1834	990	1176	504	755	140	544
FBgn0259731	838.155	1.26038	0.258107	1.06075e-06	4.30882e-06	TRUE	tal-2A	protein_coding	4.88002	1977.35	2085.74	1492.2	2021.42	1232.22	1362.05	947.484	1181.57	491.252	650.877	260.012	612.592	2585	2631	1968	2496	1456	1834	990	1176	504	755	140	544
FBgn0259732	838.155	1.26038	0.258107	1.06075e-06	4.30882e-06	TRUE	tal-3A	protein_coding	4.88002	1977.35	2085.74	1492.2	2021.42	1232.22	1362.05	947.484	1181.57	491.252	650.877	260.012	612.592	2585	2631	1968	2496	1456	1834	990	1176	504	755	140	544
FBgn0259733	838.155	1.26038	0.258107	1.06075e-06	4.30882e-06	TRUE	tal-AA	protein_coding	4.88002	1977.35	2085.74	1492.2	2021.42	1232.22	1362.05	947.484	1181.57	491.252	650.877	260.012	612.592	2585	2631	1968	2496	1456	1834	990	1176	504	755	140	544
FBgn0053500	1.65161	1.26035	0.704515	0.0863894	0.126064	FALSE	CG33500	protein_coding	1.71476	5.30178	3.7803	0.858825	3.42494	0.997881	2.86969	0.842919	3.14765	0	0	0	1.28809	8	5	1	4	1	4	1	3	0	0	0	1
FBgn0052598	36.6338	1.25918	0.262112	1.63532e-06	6.44114e-06	TRUE	betaNACtes6	protein_coding	4.79395	53.4479	51.4334	71.9946	56.0078	58.9895	64.284	26.5863	6.06677	37.1604	35.5213	18.578	19.1876	70	65	95	69	69	87	28	6	38	41	10	17
FBgn0086346	5050.06	1.25871	0.109534	1.45814e-30	5.44035e-29	TRUE	ALiX	protein_coding	11.4914	6499.42	9771.01	8591.18	9564.26	7308.19	7928.37	3206.04	4393.01	2970.5	3192.54	3587.4	3323.8	8487	12311	11327	11827	8691	10641	3333	4390	3054	3715	1932	2956
FBgn0043578	203.528	1.25796	0.310199	5.16315e-05	0.000160309	TRUE	PGRP-SB1	protein_coding	4.04812	867.617	341.291	370.998	376.751	192.071	345.889	174.719	275.524	156.532	139.17	68.7695	191.696	1141	433	490	462	220	473	187	269	159	159	37	169
FBgn0052259	291.063	1.25677	0.232963	6.91026e-08	3.34556e-07	TRUE	CG32259	protein_coding	5.39349	351.854	393.914	508.503	396.38	497.17	535.555	183.997	88.8625	244.685	303.952	148.44	128.419	472	497	669	491	579	731	194	86	248	346	80	114
FBgn0034822	179.711	1.25655	0.283641	9.53082e-06	3.3467e-05	TRUE	RpL37b	protein_coding	4.42755	239.656	254.846	378.109	236.346	352.905	325.769	151.343	46.0057	135.645	228.715	66.6893	94.5165	320	326	496	287	388	453	167	44	136	256	36	82
FBgn0031811	199.18	1.25328	0.221843	1.58996e-08	8.30248e-08	TRUE	CG13982	protein_coding	5.65156	383.085	155.848	188.181	175.474	172.958	221.449	75.9711	97.9974	82.5578	57.0052	136.396	91.4546	524	226	233	253	209	329	68	72	71	53	62	65
FBgn0037149	275.856	1.25208	0.131668	1.96811e-21	3.48048e-20	TRUE	CG14561	protein_coding	9.5067	285.387	495.25	549.191	460.883	489.532	448.45	194.885	195.725	203.05	204.625	163.758	172.057	367	641	734	561	569	607	208	196	214	226	85	150
FBgn0030918	94.6616	1.25177	0.259365	1.41608e-06	5.63584e-06	TRUE	CG15056	protein_coding	4.82273	133.069	126.812	171.35	132.855	181.335	159.573	63.1038	19.1049	67.2819	113.865	61.291	45.0564	174	160	226	164	214	215	66	19	69	132	33	40
FBgn0085294	22.6124	1.25144	0.277477	7.1554e-06	2.55915e-05	TRUE	CG34265	protein_coding	4.48901	27.8952	61.1561	34.1562	51.7066	33.1972	40.4649	19.2229	13.5119	13.9018	17.7428	11.1384	25.1884	37	78	45	63	37	56	21	13	14	20	6	22
FBgn0028394	1728.34	1.25113	0.184705	1.25783e-11	9.24047e-11	TRUE	CG17834	protein_coding	6.77341	1545.42	3371.21	2631.65	3588.68	2267.91	2594.32	1029.04	1257.77	944.233	751.293	1542.41	1127.05	2115	4472	3627	4640	2747	3638	1058	1169	938	864	786	1003
FBgn0039795	6967.44	1.2498	0.322242	0.000107483	0.000316854	TRUE	Spn100A	protein_coding	3.87305	13742.2	14350.1	13308.5	17956.6	10654	15895.1	9892.53	10598.7	3644.15	3217.8	1879.3	5594.41	17954	18090	17549	22190	12633	21365	10308	10572	3743	3739	1012	4972
FBgn0260447	61.7885	1.24977	0.287386	1.39634e-05	4.75161e-05	TRUE	CR11386	pseudogene	4.34444	85.6613	95.1622	121.933	76.0481	111.314	86.5446	44.4472	17.5305	24.7043	70.4265	46.4593	31.8705	113	121	161	93	126	119	48	17	25	80	25	28
FBgn0266155	9.33166	1.24976	0.433134	0.00414386	0.00870596	TRUE	lncRNA:CR44861	ncRNA	2.867	17.4623	8.66024	18.1715	17.9665	6.14987	17.4983	1.85976	2.05604	5.91861	10.5356	11.1518	3.40887	23	11	24	22	7	24	2	2	6	12	6	3
FBgn0267507	1338.88	1.24832	0.599573	0.0377798	0.0609444	FALSE	pre-rRNA:CR45847	rRNA	2.07724	1577.93	2877.61	2308.46	2154.74	2189.22	2272.66	568.383	0	1004.39	1512.89	939.425	726.818	2059	3623	3043	2667	2614	3044	589	0	1034	1764	506	647
FBgn0267192	0.722504	1.24746	0.770917	0.122107	0.169861	FALSE	lncRNA:CR45632	ncRNA	1.54599	0.744101	0.779852	2.29888	0.825641	1.8379	2.15091	0.899456	0	1.0008	0	0	0	1	1	3	1	2	3	1	0	1	0	0	0
FBgn0016794	1331.71	1.24697	0.127788	1.71607e-22	3.29169e-21	TRUE	dos	protein_coding	9.75733	2035.43	2901.76	2242.03	2726.77	1736.98	2392	987.26	1209.32	967.49	908.974	740.857	1059.99	2661	3694	2977	3392	2072	3222	1021	1206	992	1054	398	941
FBgn0033458	122.656	1.24635	0.213169	5.05218e-09	2.81772e-08	TRUE	CG18446	protein_coding	5.84544	172.994	177.702	152.434	182.059	162.706	174.868	83.518	69.1581	56.4614	34.4178	81.7077	102.383	226	224	201	225	193	235	87	69	58	40	44	91
FBgn0029694	46.889	1.24619	0.276812	6.91342e-06	2.47827e-05	TRUE	CG15375	protein_coding	4.49634	62.6799	65.751	88.6954	68.9001	66.2738	71.1541	31.4849	6.04341	34.1586	43.1883	22.2895	34.9403	82	83	117	85	78	96	33	6	35	50	12	31
FBgn0265047	145.419	1.24461	0.259942	1.71702e-06	6.75103e-06	TRUE	FDY	protein_coding	4.78416	212.398	246.877	299.871	214.842	293.432	290.364	132.403	40.2756	126.892	172.447	92.7191	75.4238	278	312	396	265	345	392	139	40	130	199	50	67
FBgn0036861	1.03265	1.2446	0.791433	0.11011	0.155565	FALSE	CG14089	protein_coding	1.5977	0.761346	0	4.54345	0.81443	1.73602	2.93331	0	0	0	0	1.85855	1.13264	1	0	6	1	2	4	0	0	0	0	1	1
FBgn0003068	639.401	1.2441	0.185829	2.16688e-11	1.55389e-10	TRUE	per	protein_coding	6.69431	582.845	1059.69	1000.23	1586.69	770.223	913.024	438.625	425.213	320.091	357.355	518.312	411.882	762	1332	1315	1955	915	1219	457	427	331	418	279	368
FBgn0039494	1681.16	1.24394	0.172605	5.74073e-13	4.77113e-12	TRUE	grass	protein_coding	7.2065	1669.62	3138.14	2942.39	2803.17	2466.74	3186.38	1163.69	1596.29	956.704	754.29	1194.23	1110.96	2184	3964	3889	3468	2912	4298	1217	1584	980	874	645	983
FBgn0038740	1295.99	1.24297	0.15158	2.40779e-16	2.73952e-15	TRUE	CG4562	protein_coding	8.1998	1267.17	2352.12	2198.38	2142.24	1934.21	1714.13	839.795	849.487	739.461	997.194	722.077	714.802	1616	2834	2785	2586	2232	2251	896	865	782	1150	407	658
FBgn0266747	3.82704	1.24277	0.570517	0.0315269	0.0520554	FALSE	lncRNA:CR45220	ncRNA	2.15036	7.03992	5.61644	5.00105	3.60395	8.12938	4.94661	3.98689	0	2.48904	2.92809	2.03149	0.955997	9	8	6	4	9	7	4	0	3	3	1	1
FBgn0250839	2916.96	1.24244	0.213043	5.4978e-09	3.04993e-08	TRUE	CG2016	protein_coding	5.83136	2187.13	4743.71	5952.13	5745.32	5696.11	5286.68	2096.38	2993.74	1554.68	1663.95	1711	2301.28	2887	6215	8217	7355	6824	7350	2122	2887	1592	1866	891	1992
FBgn0035049	4957.01	1.24178	0.557636	0.0254639	0.0431285	TRUE	Mmp1	protein_coding	2.23429	3910.46	6643.04	6030.4	6383.46	5437.88	9802.14	1675.62	3377.44	1522.51	1086.91	4813.11	1536.14	5384	8749	8254	8281	6710	12879	1806	3538	1601	1338	2420	1406
FBgn0030940	203.838	1.24169	0.351706	0.00041756	0.00110191	TRUE	CG15040	protein_coding	3.52873	241.373	373.257	446.809	328.879	277.402	251.518	174.569	28.9585	159.34	273.682	68.6948	67.4128	315	470	589	407	331	337	181	29	164	319	37	60
FBgn0026418	8883.05	1.24165	0.113435	6.95753e-28	2.05609e-26	TRUE	Hsc70Cb	protein_coding	10.9458	10871.3	17097.8	13704.6	16843.4	11198	12825	5556.93	6560.23	5545.99	5289.49	6278.17	5528.72	14128	21411	17965	20683	13262	17124	5763	6549	5709	6157	3400	4928
FBgn0030563	61.2697	1.24129	0.28856	1.73104e-05	5.7972e-05	TRUE	betaNACtes2	protein_coding	4.29703	80.9039	84.635	117.451	99.0735	95.0945	105.552	37.9188	7.08721	52.8419	66.7794	46.448	28.2304	106	107	155	122	111	143	40	7	54	77	25	25
FBgn0002891	223.564	1.24014	0.147898	5.15061e-17	6.23216e-16	TRUE	DNApol-zeta	protein_coding	8.3832	206.901	338.33	368.679	382.188	356.09	347.842	137.947	120.807	124.352	165.561	161.524	132.571	270	426	486	473	425	466	143	121	128	193	87	118
FBgn0035678	133.96	1.23798	0.224045	3.29606e-08	1.66217e-07	TRUE	CG10469	protein_coding	5.52494	193.274	235.924	157.653	184.954	168.8	181.284	67.5625	92.8609	75.2307	44.9898	135.608	58.6543	253	298	208	228	198	245	71	92	77	52	73	52
FBgn0259738	0.696269	1.23676	0.804648	0.121389	0.169134	FALSE	CG42392	protein_coding	1.54897	0.760717	1.57697	2.27146	0.815154	0	1.46386	0	0	0	0	0	0	1	2	3	1	0	2	0	0	0	0	0	0
FBgn0265823	1.08019	1.23554	0.788506	0.138982	0.190046	FALSE	lncRNA:CR44612	ncRNA	1.47959	0.765829	0	0.758474	4.85191	2.52229	4.47081	0.962026	0	0	0	1.85682	1.12438	1	0	1	6	3	6	1	0	0	0	1	1
FBgn0036809	142.762	1.23509	0.227621	5.82996e-08	2.86063e-07	TRUE	CG12477	protein_coding	5.42394	193.44	197.305	245.636	183.944	255.382	224.001	101.247	38.2404	106.33	145.874	92.8688	56.3369	253	249	324	227	301	302	106	38	109	169	50	50
FBgn0032280	53.0058	1.23453	0.343023	0.000332169	0.000895465	TRUE	CG17105	protein_coding	3.58883	119.166	73.466	73.5924	123.534	88.2514	111.34	19.3623	71.8521	48.0968	36.6569	4.34868	56.6415	162	117	99	169	106	174	23	72	46	41	2	45
FBgn0061476	150.585	1.23378	0.181729	1.15144e-11	8.48681e-11	TRUE	Zwilch	protein_coding	6.78618	179.134	227.702	277.572	245.953	264.578	227.759	111.402	78.1535	126.53	128.174	103.99	48.373	234	287	366	304	314	306	116	78	130	149	56	43
FBgn0032717	3534.72	1.23283	0.152612	6.59006e-16	7.19933e-15	TRUE	CG10600	protein_coding	8.07788	3760.48	7202.82	6946.58	7018.61	5564.25	5344.64	2524.95	3078.84	2392.66	2989.46	2101.38	2037.04	4908	9070	9153	8682	6632	7158	2619	3081	2463	3482	1131	1813
FBgn0032262	160.356	1.22995	0.291853	2.52784e-05	8.27078e-05	TRUE	CG7384	protein_coding	4.2123	225.836	288.799	305.635	317.142	193.776	247.126	94.1245	126.239	93.4341	55.0514	211.693	78.7446	295	364	403	392	230	332	98	126	96	64	114	70
FBgn0031715	80.2192	1.22961	0.323703	0.000147713	0.000426759	TRUE	tomb	protein_coding	3.79488	115.948	105.931	112.127	103.204	159.832	161.402	70.9311	19.2731	64.6481	99.0158	26.0133	28.25	152	134	148	127	186	219	75	19	66	114	14	25
FBgn0032645	73.4356	1.22909	0.22489	4.75203e-08	2.35388e-07	TRUE	CG15142	protein_coding	5.46035	102.916	96.3841	136.346	100.027	146.579	109.628	47.1642	31.5124	40.2039	86.1282	48.3149	35.0573	135	122	180	123	170	149	50	31	41	99	26	31
FBgn0265677	14.9939	1.22851	0.336938	0.000276275	0.00075892	TRUE	lncRNA:CR44484	ncRNA	3.63659	14.0597	15.5667	17.7115	23.163	27.7774	15.0295	10.7344	1.05193	9.03028	9.02468	7.37352	8.16269	19	20	23	28	30	21	12	1	9	10	4	7
FBgn0263041	40.5907	1.22851	0.273273	7.33162e-06	2.61559e-05	TRUE	CG43336	protein_coding	4.48383	103.748	59.2918	82.5809	72.321	33.5067	88.4494	29.3224	39.5558	32.322	25.1858	16.7227	38.4182	136	75	109	89	39	120	31	39	33	29	9	34
FBgn0263748	3.94875	1.22794	0.739872	0.0845078	0.123711	FALSE	CG43673	protein_coding	1.72511	3.05241	1.58167	2.27312	4.87359	1.71519	11.8039	0	2.02623	0	0.867704	1.85798	2.25896	4	2	3	6	2	16	0	2	0	1	1	2
FBgn0051326	242.601	1.22794	0.503434	0.0142795	0.025855	TRUE	CG31326	protein_coding	2.45015	159.923	199.841	229.765	230.715	420.686	300.316	55.5895	58.2073	25.3271	29.2845	391.852	34.894	209	252	303	285	498	404	58	58	26	34	211	31
FBgn0031753	359.791	1.22676	0.116448	5.90777e-26	1.49202e-24	TRUE	CG13999	protein_coding	10.5358	347.545	304.764	367.593	354.547	410.336	398.694	155.98	129.251	155.38	162.708	208.06	126.351	455	385	485	437	481	539	164	128	159	188	112	112
FBgn0265912	0.759744	1.22586	0.792436	0.13293	0.18269	FALSE	lncRNA:CR44701	ncRNA	1.50265	1.38482	1.52875	4.11299	0	1.95245	0	0	0	0	0	0	0	2	2	5	0	2	0	0	0	0	0	0	0
FBgn0052055	45.982	1.22583	0.227608	7.67476e-08	3.69054e-07	TRUE	CG32055	protein_coding	5.37461	69.6163	105.448	64.4516	101.219	61.7431	83.204	31.5978	42.1829	21.4393	43.9535	31.5723	32.6521	91	133	85	125	73	112	33	42	22	51	17	29
FBgn0023076	808.497	1.225	0.161121	2.89265e-14	2.72743e-13	TRUE	Clk	protein_coding	7.60303	985.094	1142.41	1049.41	1067.19	1091.06	811.12	427.399	232.464	463.579	544.37	493.523	446.898	1250	1418	1385	1320	1305	1089	445	233	478	634	270	397
FBgn0036332	192.353	1.22479	0.123198	2.84565e-23	5.80758e-22	TRUE	Cul6	protein_coding	9.93797	276.353	326.872	352.652	325.246	262.911	284.317	129.642	132.266	148.92	159.148	102.133	97.8725	361	412	465	402	312	382	135	132	153	185	55	87
FBgn0264395	38.4373	1.22324	0.255076	1.6962e-06	6.67085e-06	TRUE	CG43843	protein_coding	4.78661	69.5577	62.5807	78.0817	42.1519	64.5833	51.8796	19.0797	13.0952	42.9442	30.2338	22.2896	25.9243	91	79	103	52	76	70	20	13	44	35	12	23
FBgn0003510	80.9466	1.22279	0.393871			FALSE	Sry-alpha	protein_coding	3.10072	100.236	215.886	122.689	126.785	116.036	121.826	47.3447	172.535	30.3538	33.315	21.0764	21.2682	138	238	171	158	146	163	52	136	33	41	12	20
FBgn0040989	446.511	1.2222	0.214876	1.28798e-08	6.79089e-08	TRUE	CG5693	protein_coding	5.68765	545.438	519.821	627.657	606.468	764.404	589.723	238.45	140.659	320.362	395.531	239.771	204.403	718	660	829	743	872	808	256	137	325	451	129	180
FBgn0039787	100.557	1.22175	0.555234	0.0276487	0.0464216	TRUE	CG9702	protein_coding	2.20224	93.6821	139.952	140.931	185.903	191.18	149.107	25.5955	82.3722	3.99321	5.32896	210.143	13.1125	121	172	182	224	222	197	26	84	4	6	116	12
FBgn0262996	140.02	1.22153	0.255672	1.77962e-06	6.96564e-06	TRUE	lncRNA:CR43304	ncRNA	4.77696	170.428	152.125	206.426	188.742	204.45	177.072	89.7425	28.0562	109.211	117.957	61.2641	51.5101	226	194	272	230	228	245	98	27	110	133	33	45
FBgn0036938	1.35608	1.22131	0.71842	0.11016	0.155596	FALSE	CG14187	protein_coding	1.59747	1.7944	0.728691	0.908849	3.82424	1.65546	6.72357	1.08682	0	0	2.46278	0	1.06006	2	1	1	5	2	10	1	0	0	3	0	1
FBgn0061356	1355.27	1.22093	0.184085	3.31508e-11	2.33655e-10	TRUE	CG18003	protein_coding	6.63185	3585.12	2146.56	2038.62	2296.49	1540.84	2198.42	901.643	1292.16	889.673	728.52	1038.27	1008.44	4689	2709	2689	2834	1816	2964	944	1284	912	844	559	895
FBgn0085419	487.817	1.22053	0.153099	1.57905e-15	1.67585e-14	TRUE	Rgk2	protein_coding	7.9706	678.957	1004.15	776.442	1164.07	656.01	800.273	381.653	460.01	372.284	328.615	247.201	366.957	881	1284	1036	1449	788	1073	393	460	379	383	135	325
FBgn0000449	45.4166	1.2186	0.377614	0.00132754	0.00314442	TRUE	dib	protein_coding	3.20996	29.8492	109.463	116.786	123.011	100.392	76.6171	38.3778	78.2134	20.4476	32.7083	14.8563	41.6349	39	138	154	152	119	103	40	78	21	38	8	37
FBgn0034612	46.1705	1.21757	0.218753	2.63909e-08	1.34475e-07	TRUE	CG10505	protein_coding	5.56384	43.6684	46.8462	48.5472	71.1273	70.477	38.7879	22.1632	21.984	16.523	21.4603	25.9937	28.096	57	59	64	88	84	52	23	22	17	25	14	25
FBgn0028490	6704.42	1.21591	0.189582	1.4205e-10	9.42156e-10	TRUE	CG31705	protein_coding	6.41368	6480.4	10607.9	9946.45	10300.5	8594.42	9749.35	3476.35	3934	3088.23	2660.23	6940.28	3597.47	8397	13298	13018	12644	10159	13017	3603	3920	3160	3095	3733	3202
FBgn0038266	1075.3	1.21558	0.201572	1.63731e-09	9.71022e-09	TRUE	CG3610	protein_coding	6.03023	1573.08	1489.16	1676.56	1417.64	1797.67	1481.14	666.817	338.309	871.003	992.467	637.002	499.829	2056	1878	2211	1751	2127	1993	696	337	894	1152	343	444
FBgn0029986	103.101	1.21524	0.251723	1.40281e-06	5.58871e-06	TRUE	CG15332	protein_coding	4.82461	157.669	138.023	188.83	123.007	188.101	167.38	90.1984	24.0634	82.7602	105.003	57.5679	43.884	206	174	249	152	223	225	94	24	85	122	31	39
FBgn0264878	5.56049	1.21508	0.606631	0.0478267	0.0749226	FALSE	asRNA:CR44069	ncRNA	1.9789	6.88172	15.8488	3.0326	12.9642	10.1777	6.67672	2.86629	12.0732	0.975392	0	1.85736	2.25329	9	20	4	16	12	9	3	12	1	0	1	2
FBgn0044011	51.7894	1.2148	0.696885	0.0572431	0.0878799	FALSE	Spn43Ad	protein_coding	1.90145	3.0591	17.4369	26.5366	15.3914	26.2658	39.3385	2.86857	0	0	0	37.1459	0	4	22	35	19	31	53	3	0	0	0	20	0
FBgn0054029	106.247	1.21462	0.240281	4.36437e-07	1.88737e-06	TRUE	CG34029	protein_coding	5.05234	135.598	149.694	177.691	123.986	178.881	163.913	74.9589	36.411	77.5	110.106	33.4084	55.0029	180	191	234	151	199	227	82	35	78	124	18	48
FBgn0032058	29.9528	1.21325	0.312496	0.000105586	0.000311969	TRUE	CG9289	protein_coding	3.87738	32.1497	46.0128	65.9789	46.121	27.8184	46.8811	20.1605	20.045	8.76107	7.74376	37.1398	21.3763	42	58	87	57	33	63	21	20	9	9	20	19
FBgn0031381	2803.25	1.21258	0.116919	3.3693e-25	7.95653e-24	TRUE	Npc2a	protein_coding	10.3707	4582.94	5363.54	4604.45	5094.94	3696.79	5225.84	1955.31	2629.68	1813.64	1693.84	2081.64	2101.4	6023	6801	6081	6252	4247	7136	2088	2572	1844	1938	1120	1854
FBgn0037683	809.024	1.21253	0.169534	8.55742e-13	6.99676e-12	TRUE	CG18473	protein_coding	7.15192	1564.93	1361.96	905.185	1319.4	766.63	1067.74	447.749	507.39	511.27	362.639	599.944	562.323	2047	1719	1194	1628	903	1440	469	504	524	420	323	499
FBgn0050417	88.0901	1.212	0.259043	2.93425e-06	1.1169e-05	TRUE	tbrd-3	protein_coding	4.67537	107.565	139.142	147.737	119.448	159.781	151.849	72.8411	19.2691	70.5175	85.1047	57.6002	41.8067	141	176	195	147	186	206	77	19	72	98	31	37
FBgn0283499	768.144	1.21199	0.147545	2.15027e-16	2.45904e-15	TRUE	InR	protein_coding	8.21339	1182.13	1710.39	1340.68	1404.58	911.344	1254.02	543.056	672.186	564.427	490.86	398.57	669.759	1541	2156	1774	1744	1089	1678	563	674	580	572	214	595
FBgn0036583	1214.4	1.21114	0.115944	1.54225e-25	3.75545e-24	TRUE	CG13055	protein_coding	10.4451	2090.91	2502.51	2217.9	2099.76	1719.87	1735.1	956.433	810.638	909.444	848.14	694.622	1092.53	2704	3204	2831	2639	2025	2304	917	808	955	1007	392	995
FBgn0262534	34.786	1.21055	0.26775	6.42938e-06	2.31378e-05	TRUE	CG43088	protein_coding	4.51175	42.0351	40.395	72.7726	52.6982	64.6285	59.2701	29.5574	11.0854	23.4294	35.4289	11.145	25.9284	55	51	96	65	76	80	31	11	24	41	6	23
FBgn0034162	4177.87	1.2104	0.293745	3.78499e-05	0.000120022	TRUE	CG6426	protein_coding	4.12023	2192.3	6594.95	8485.83	6706.25	7418.53	7116.58	2344.25	5009.8	1508.13	1393.86	3681.58	2219.71	2878	8354	11205	8239	8569	9692	2493	4916	1536	1599	1981	1961
FBgn0031070	286.053	1.21001	0.130367	1.70575e-20	2.78933e-19	TRUE	CG12702	protein_coding	9.27931	392.786	532.01	458.397	522.596	455.554	391.061	209.34	177.446	207.848	253.924	169.231	158.179	502	660	602	632	532	535	223	169	222	301	94	138
FBgn0000079	129.65	1.20944	0.565185	0.0309685	0.0512416	FALSE	Amy-p	protein_coding	2.15748	65.4495	80.4476	102.269	167.901	88.9503	313.333	37.5839	24.2632	14.7135	8.67495	205.292	18.1329	85	104	134	206	107	421	39	24	15	10	112	16
FBgn0265194	2513.81	1.20937	0.178654	1.29518e-11	9.50586e-11	TRUE	Trpm	protein_coding	6.76918	2614.26	5152.89	4311.08	4516.66	3107.99	2990.72	1623.44	1629.97	1269.91	1192.52	2288.73	1714.64	3424	6566	5708	5635	3712	4022	1661	1642	1295	1383	1239	1520
FBgn0035083	3026.95	1.20875	0.143164	3.09632e-17	3.83556e-16	TRUE	Tina-1	protein_coding	8.44287	3571.74	5399.75	5296.13	6256.11	4052.46	5150.3	2042.38	2805.58	1920.75	1667.79	2316.35	2025.79	4654	6909	7088	7781	4818	7053	2145	2749	1957	1909	1245	1783
FBgn0001233	53871.3	1.20807	0.135943	6.3053e-19	9.01836e-18	TRUE	Hsp83	protein_coding	8.88652	55657.1	102265	91240	94033.9	72979.9	77262.1	33845.8	42930.5	36320.2	35781.6	29168	34244.1	72824	128382	120177	115969	86829	103547	35318	42746	37486	41939	15744	30440
FBgn0259215	39.8461	1.20765	0.251953	1.77846e-06	6.96285e-06	TRUE	Ir93a	protein_coding	4.77709	79.6389	96.8227	63.7103	112.416	45.4248	67.7894	26.9256	30.0275	37.9383	46.4141	18.5686	34.8601	104	122	84	139	54	91	28	30	39	54	10	31
FBgn0032140	770.539	1.20675	0.147106	2.35944e-16	2.68647e-15	TRUE	CG13117	protein_coding	8.20224	1096.64	1443.41	1285.46	1411.62	1121.57	1510.18	546.188	803.541	513.589	386.615	642.463	498.052	1466	1887	1732	1806	1324	2123	570	779	515	440	337	435
FBgn0031955	450.108	1.20619	0.161114	7.17167e-14	6.52589e-13	TRUE	CG14535	protein_coding	7.48469	622.685	1151	801.318	960.476	573.256	750.416	369.871	420.47	332.431	357.615	271.184	332.203	814	1450	1059	1188	682	1006	382	420	340	415	146	296
FBgn0037719	627.912	1.20522	0.110455	1.02841e-27	2.98278e-26	TRUE	bocks	protein_coding	10.9104	805.906	1167.09	901.09	1223	904.697	943.967	457.416	468.306	390.053	393.238	452.647	409.452	1057	1476	1196	1513	1070	1270	475	464	398	455	243	364
FBgn0023180	27.8278	1.20468	0.327324	0.000241046	0.000670348	TRUE	Orc6	protein_coding	3.67159	28.2518	65.6784	45.4707	39.7723	41.8844	47.2932	7.59702	33.3639	12.7121	19.0587	27.8668	13.5437	37	83	60	49	49	64	8	33	13	22	15	12
FBgn0037746	1118.67	1.20394	0.198348	1.28326e-09	7.68332e-09	TRUE	CG8478	protein_coding	6.06948	1408.3	1680.05	2061.94	1478.12	1803.5	1656.27	812.259	433.39	822.174	1196.69	527.37	524.181	1855	2112	2731	1831	2142	2237	847	420	849	1395	281	467
FBgn0002842	200.646	1.20281	0.201519	2.41668e-09	1.39925e-08	TRUE	sa	protein_coding	5.96699	243.551	272.975	416.046	242.72	322.421	346.481	133.844	69.7835	145.723	201.034	137.479	101.589	319	345	549	299	377	469	141	69	149	232	74	90
FBgn0263345	222.069	1.2006	0.127261	4.02076e-21	6.92253e-20	TRUE	asRNA:CR43426	ncRNA	9.43207	254.962	281.137	349.684	359.664	362.36	338.83	138.314	117.284	146.47	155.17	151.921	134.951	338	350	455	445	435	456	155	118	145	180	79	124
FBgn0002924	554.013	1.20021	0.11542	2.53789e-25	6.07578e-24	TRUE	ncd	protein_coding	10.3978	627.727	896.765	832.17	842.405	907.74	793.164	327.261	409.152	373.966	381.409	377.124	255.224	800	1102	1084	1017	1066	1053	346	404	381	458	213	241
FBgn0037916	177.784	1.19994	0.2277	1.38312e-07	6.42375e-07	TRUE	CG5342	protein_coding	5.26748	257.277	292.828	326.13	270.955	308.841	283.766	120.167	54.0627	158.583	208.904	103.985	95.5928	336	369	430	335	367	381	125	54	163	243	56	85
FBgn0085734	6.57684	1.19928	0.510552	0.0200127	0.0348822	TRUE	CR40450	pseudogene	2.32611	4.59068	3.17178	8.34109	12.1443	22.82	13.3769	6.70637	1.0039	0.974284	5.16916	9.28575	3.37724	6	4	11	15	27	18	7	1	1	6	5	3
FBgn0034394	334.874	1.19876	0.410629	0.00348879	0.00749591	TRUE	CG15096	protein_coding	2.92103	286.425	606.365	390.804	511.909	395.573	524.371	139.181	85.2098	106.892	48.9592	616.406	120.477	393	800	539	658	484	726	138	84	99	54	340	101
FBgn0034628	911.119	1.19855	0.128694	1.24691e-20	2.05839e-19	TRUE	Acox57D-p	protein_coding	9.31264	1180.08	1682.72	1415.04	1579.26	1141.72	1417.55	578.037	743.268	562.166	509.642	600.129	655.874	1508	2082	1805	1908	1331	1856	616	734	596	616	325	595
FBgn0265017	9.19048	1.19816	0.438214	0.00694245	0.0137939	TRUE	lncRNA:CR43751	ncRNA	2.69959	19.1486	19.8456	15.9286	25.0634	9.24064	15.6545	14.44	8.00048	9.72343	2.57683	5.57031	2.24833	25	25	21	31	11	21	15	8	10	3	3	2
FBgn0031042	57.0527	1.19791	0.168033	1.11042e-12	9.00373e-12	TRUE	CG14221	protein_coding	7.11608	103.99	118.532	90.9432	131.939	77.3045	93.9958	51.7142	48.3775	42.6234	39.183	44.615	40.3212	137	149	119	161	90	126	54	49	43	46	24	36
FBgn0039092	2.94402	1.19769	0.672505	0.0775717	0.114896	FALSE	CG16723	protein_coding	1.76495	3.06178	3.96648	1.51674	2.42753	1.68629	11.9051	4.7994	3.00711	0	0	0	0	4	5	2	3	2	16	5	3	0	0	0	0
FBgn0261793	2648.5	1.19769	0.141994	3.32522e-17	4.10285e-16	TRUE	Trf2	protein_coding	8.43454	2786.16	5511.84	4453.43	5291.64	3386.59	3698.73	1950.43	1808.14	1606.15	1755.94	1759.25	2003.7	3632	6925	5865	6544	4036	4948	2027	1816	1656	2041	947	1783
FBgn0052152	101.057	1.19713	0.216404	3.23878e-08	1.6354e-07	TRUE	CG32152	protein_coding	5.52801	139.807	146.46	188.839	196.716	170.889	138.704	98.004	28.7164	60.2225	101.573	64.0999	67.4674	183	183	254	239	200	184	100	30	63	118	35	58
FBgn0028526	2525.82	1.19652	0.231298	2.29413e-07	1.03117e-06	TRUE	CG15293	protein_coding	5.17377	2980.57	3073.51	2178.29	2902.66	2706.1	2872.81	1037.47	919.916	889.005	641.129	2399.72	1287.18	3911	3882	2894	3591	3186	3886	1085	911	909	741	1288	1142
FBgn0265081	4.90891	1.1956	0.651941	0.0632203	0.0958793	FALSE	asRNA:CR44192	ncRNA	1.85764	0.830442	7.28161	3.4848	8.87607	6.25132	10.8952	4.13403	0	0	0	9.45098	1.22693	1	10	5	11	7	16	4	0	0	0	5	1
FBgn0039297	4405.61	1.19531	0.44686	0.00790835	0.0154481	TRUE	CG11852	protein_coding	2.65596	4255.41	10186.4	10898.2	8837.51	10009.1	11240.9	2889.66	11196.7	2488.92	2270.01	910.262	2821.4	5571	12868	14379	10893	11734	15196	3038	11089	2547	2623	490	2501
FBgn0285993	0.760932	1.19456	0.788029	0.141505	0.192948	FALSE	hpRNA:CR46343	ncRNA	1.47021	0	0	4.61946	2.74641	2.05883	0	0	0	0	0	0	0	0	0	5	3	2	0	0	0	0	0	0	0
FBgn0028581	9.02724	1.19394	0.720692	0.0981314	0.14104	FALSE	mei-217	protein_coding	1.65398	13.7912	19.0577	18.9642	11.3145	24.3199	0	10.6037	9.98977	0	0	7.42664	0	18	24	25	14	29	0	11	10	0	0	4	0
FBgn0050121	4.35358	1.19354	0.666311	0.0668433	0.100621	FALSE	lncRNA:CR30121	ncRNA	1.83273	0.765567	11.108	3.03362	4.04504	5.05428	8.18853	0.960567	0	0	0	11.1417	1.12488	1	14	4	5	6	11	1	0	0	0	6	1
FBgn0030912	129.191	1.19339	0.228426	1.77177e-07	8.09883e-07	TRUE	CG6023	protein_coding	5.22182	152.905	267.12	276.341	167.702	144.574	224.539	101.058	115.387	60.856	51.2308	112.175	92.9764	202	341	370	209	173	306	105	114	62	59	60	82
FBgn0037897	1755.41	1.1928	0.131274	1.02834e-19	1.57453e-18	TRUE	CG5270	protein_coding	9.08591	3685.29	3253.19	3013.19	2628.3	2037.17	2577.03	1231.15	1433.49	1148.22	1073.87	1100.95	1490.77	4809	4096	3972	3253	2432	3452	1276	1436	1182	1252	593	1327
FBgn0002641	333.815	1.19266	0.167146	9.67274e-13	7.85527e-12	TRUE	mal	protein_coding	7.13508	332.547	579.461	416.586	588.997	391.675	462.701	204.499	206.607	166.27	134.727	277.427	220.97	431	725	546	722	461	612	215	206	178	157	147	196
FBgn0262023	1.44697	1.19259	0.760985	0.129429	0.178711	FALSE	CG42834	protein_coding	1.51636	0.757947	0.786378	0.757361	5.7246	2.65174	3.63541	0.925633	0	0	2.64175	0	0	1	1	1	7	3	5	1	0	0	3	0	0
FBgn0031513	171.595	1.19244	0.245877	1.24788e-06	5.00849e-06	TRUE	CG3347	protein_coding	4.84788	196.344	233.693	342.79	256.495	286.849	258.839	155.72	43.2212	143.594	169.102	76.3042	83.4573	256	294	452	321	340	352	162	43	148	196	41	74
FBgn0261924	20.6244	1.19204	0.364006	0.00113649	0.00272539	TRUE	lncRNA:CR42791	ncRNA	3.25436	17.1813	57.0101	22.9142	52.7615	23.751	61.0462	20.7777	28.2769	11.9853	12.5376	7.40277	16.1783	23	73	30	64	26	85	23	27	12	14	4	14
FBgn0030931	1.73046	1.19179	0.687199	0.092177	0.133488	FALSE	Xrcc2	protein_coding	1.68402	0.76413	3.95953	3.79003	0.810933	4.25635	2.22146	0.952682	1.00843	0.976557	0.864565	0	1.12759	1	5	5	1	5	3	1	1	1	1	0	1
FBgn0266196	2.7946	1.19176	0.558834	0.0386009	0.0620576	FALSE	asRNA:CR44891	ncRNA	2.06842	5.32589	3.94296	3.78581	7.33516	3.48322	5.85745	3.74467	2.04536	0	2.62255	1.85861	1.13354	7	5	5	9	4	8	4	2	0	3	1	1
FBgn0040949	0.875024	1.1916	0.792386	0.142938	0.194613	FALSE	CG13998	protein_coding	1.46494	0.720782	2.31662	3.15937	2.50089	0.950366	0	0.877473	0	1.01323	0	0	0	1	3	4	3	1	0	1	0	1	0	0	0
FBgn0034966	111.138	1.19032	0.339084	0.000455807	0.00119457	TRUE	CG13563	protein_coding	3.50547	362.066	167.39	153.192	188.531	136.567	182.313	120.961	164.372	23.3631	81.7408	51.9957	57.3789	473	211	202	233	162	245	126	164	24	95	28	51
FBgn0265417	17.7394	1.18981	0.268287	1.00286e-05	3.50104e-05	TRUE	CG44329	protein_coding	4.41656	25.833	19.6929	35.5843	24.4837	35.0408	22.6329	8.38707	7.18412	12.8117	14.9042	16.7281	11.3536	34	25	47	30	40	31	9	7	13	17	9	10
FBgn0260722	437.933	1.1898	0.155906	2.34345e-14	2.22571e-13	TRUE	lncRNA:CR42549	ncRNA	7.63022	620.104	864.059	725.947	835.164	523.275	761.24	337.583	448.839	267.943	230.148	311.274	288.35	810	1089	957	1031	619	1024	352	447	275	267	168	256
FBgn0284231	1481.66	1.18952	0.235858	4.58023e-07	1.97416e-06	TRUE	CG46315	protein_coding	5.04311	1286.48	3727.89	2633.06	2268.53	1680.02	1745.98	1060.99	1127.58	597.96	768.393	1112.16	1077.91	1686	4774	3479	2835	2017	2331	1089	1115	601	874	600	949
FBgn0033292	147.241	1.18778	0.184286	1.16358e-10	7.78024e-10	TRUE	Cyp4ad1	protein_coding	6.44401	207.411	159.196	245.155	183.948	167.356	199.043	106.611	45.1124	89.3938	114.005	77.1672	69.6635	266	214	318	221	194	266	107	44	84	126	41	58
FBgn0031209	107.717	1.18747	0.274792	1.54758e-05	5.22645e-05	TRUE	Ir21a	protein_coding	4.32181	245.795	122.212	71.2938	63.8956	108.548	128.854	56.7224	57.0633	55.4539	46.4212	27.8531	70.8498	321	154	94	79	129	173	59	57	57	54	15	63
FBgn0262960	84.715	1.18721	0.298134	6.8345e-05	0.000208232	TRUE	CG43271	protein_coding	3.98197	112.505	102.727	104.982	104.935	129.107	105.239	60.081	11.8934	65.924	70.6321	50.3441	22.218	152	127	131	127	136	149	66	14	69	80	30	22
FBgn0265317	1.73509	1.18658	0.757475	0.128586	0.177688	FALSE	CG44290	protein_coding	1.5197	1.4512	2.32112	6.27679	0.832121	0.944937	5.70798	0	0	2.02189	2.74367	0	0	2	3	8	1	1	8	0	0	2	3	0	0
FBgn0267208	3.06143	1.18639	0.563924	0.0411407	0.0655743	FALSE	asRNA:CR45648	ncRNA	2.04211	5.76626	5.40545	5.52891	8.33631	3.80146	4.27929	5.26484	0	1.01323	0.918466	3.64113	2.3883	8	7	7	10	4	6	6	0	1	1	2	2
FBgn0031549	183.709	1.18632	0.12766	1.54613e-20	2.53627e-19	TRUE	Spindly	protein_coding	9.28978	216.688	299.961	307.166	298.467	265.969	264.378	121.112	99.1258	141.079	152.177	98.4153	103.469	283	378	405	369	316	355	126	99	145	177	53	92
FBgn0267253	547.463	1.18627	0.138657	1.17683e-17	1.51668e-16	TRUE	CG32700	protein_coding	8.55518	665.687	637.316	823.901	761.798	724.528	710.7	322.448	205.721	294.792	439.852	328.791	298.636	807	764	996	812	811	885	288	195	285	376	221	254
FBgn0030103	12.1719	1.18625	0.521782	0.0231874	0.0396886	TRUE	Obp8a	protein_coding	2.27033	7.59846	16.5427	14.3851	17.1373	24.5221	23.3658	7.45664	0	2.95634	6.13629	7.43478	17.0291	10	21	19	21	28	32	8	0	3	7	4	15
FBgn0035751	8.98623	1.18549	0.571138	0.0362905	0.0589066	FALSE	CG14829	protein_coding	2.09366	4.58668	13.4681	13.6457	8.91565	10.1918	16.3095	1.90879	3.02092	0	0.863591	16.7169	5.63501	6	17	18	11	12	22	2	3	0	1	9	5
FBgn0032282	6.11042	1.1853	0.434419	0.0080849	0.015736	TRUE	CG7299	protein_coding	2.6485	8.31799	18.1413	8.27845	7.15446	13.3347	20.8099	5.11626	6.71065	6.45393	4.77993	2.03213	6.19752	10	22	10	9	14	26	5	6	6	5	1	5
FBgn0004581	822.954	1.184	0.190613	5.25861e-10	3.27391e-09	TRUE	bgcn	protein_coding	6.21119	1227.97	1148.82	1250.85	1154.29	1313.44	1104.57	579.975	255.862	601.696	788.141	488.32	414.729	1603	1447	1649	1428	1565	1481	602	256	619	918	263	369
FBgn0051559	399.54	1.18215	0.338108	0.000485028	0.00126395	TRUE	CG31559	protein_coding	3.48889	1075.37	1005.82	464.872	967.058	603.104	775.156	583.411	513.352	280.411	334.805	59.4249	300.436	1405	1268	613	1195	715	1042	608	512	288	389	32	267
FBgn0067102	1114.94	1.18188	0.103701	4.36336e-30	1.55381e-28	TRUE	GlcT	protein_coding	11.3963	1874.26	1864.69	1708.15	1997.8	1312.19	1915.79	751.83	972.069	759.404	651.943	798.412	757.69	2447	2349	2252	2471	1562	2570	781	972	781	759	430	674
FBgn0030778	1181.59	1.18169	0.395542	0.00291948	0.00639257	TRUE	CG4678	protein_coding	2.97609	4160.22	2326.65	1581.53	2943.63	1534.8	2073.29	1064.63	1425.45	520.045	1525.83	209.894	1363.72	5501	2955	2111	3685	1837	2825	1119	1435	540	1785	112	1221
FBgn0030524	59.9322	1.18149	0.255787	3.93796e-06	1.47137e-05	TRUE	CG10993	protein_coding	4.61463	72.3678	83.6827	102.24	89.533	112.529	95.463	29.1538	22.4176	41.2359	65.3732	61.3284	22.6378	95	106	135	110	130	130	31	22	42	75	33	20
FBgn0265792	10.1927	1.18128	0.491637	0.0169595	0.0301248	TRUE	lncRNA:CR44581	ncRNA	2.38758	14.5134	18.2074	18.1904	23.5272	13.6466	11.0965	2.85375	1.00964	14.6575	6.92304	9.28836	5.64041	19	23	24	29	16	15	3	1	15	8	5	5
FBgn0004959	326.159	1.18042	0.342241	0.000574442	0.00147217	TRUE	phm	protein_coding	3.4434	268.668	710.222	540.661	694.793	736.93	881.788	210.78	692.984	205.797	164.431	144.752	205.697	344	887	699	854	904	1174	219	706	218	186	81	190
FBgn0003358	2.82549	1.18024	0.737457	0.101086	0.144701	FALSE	Jon99Ci	protein_coding	1.63961	2.28973	6.32785	2.27324	5.68454	3.42683	4.42875	0	0	0	0	9.2896	0	3	8	3	7	4	6	0	0	0	0	5	0
FBgn0265725	2.91799	1.17893	0.673827	0.0852789	0.124653	FALSE	CG44532	protein_coding	1.72085	0.763523	8.70391	7.57833	2.43519	5.98521	2.9554	0	1.01121	3.91178	1.73286	3.71561	0	1	11	10	3	7	4	0	1	4	2	2	0
FBgn0002632	24.5949	1.17829	0.622869	0.0653296	0.0986379	FALSE	E(spl)m6-BFM	protein_coding	1.843	5.34901	113.245	62.9149	50.2766	40.0055	37.7667	10.4804	80.6688	9.76524	5.18712	0	10.1481	7	143	83	62	47	51	11	80	10	6	0	9
FBgn0039754	4193.79	1.17649	0.236102	6.28713e-07	2.64639e-06	TRUE	CG9747	protein_coding	4.98218	2640.54	7972.1	5918.45	11025.2	7804.47	8716.59	2815.05	4300.19	3179.55	2605.77	2428.53	3818.68	3447	10299	7931	13893	9372	11921	2909	4298	3243	3000	1296	3368
FBgn0266757	280.544	1.17499	0.218275	7.37592e-08	3.55449e-07	TRUE	mfr	protein_coding	5.38176	386.716	428.233	494.283	365.367	509.263	411.466	218.59	98.4293	223.142	305.493	121.068	159.423	503	538	650	456	609	551	227	97	230	356	65	144
FBgn0030051	1058.63	1.17475	0.207819	1.59063e-08	8.30259e-08	TRUE	spirit	protein_coding	5.65149	2185.79	2485.72	1614.06	1949.12	1498.93	2050.05	1130.06	1325.56	675.852	572.978	489.216	949.948	2847	3128	2125	2398	1769	2749	1178	1313	694	668	267	841
FBgn0004898	85.7741	1.1739	0.271373	1.56555e-05	5.2826e-05	TRUE	fd96Cb	protein_coding	4.31926	78.6916	201.108	167.511	201.966	129.519	172.449	61.8772	116.04	84.0103	57.9534	37.1524	51.8806	103	254	221	249	152	233	65	115	86	67	20	46
FBgn0259195	80.3112	1.17367	0.247869	2.23191e-06	8.62369e-06	TRUE	CG42299	protein_coding	4.73121	124.096	115.988	136.303	96.107	134.566	142.987	61.9306	18.3746	53.0666	95.1447	50.1802	45.3077	163	147	180	118	155	195	66	18	54	109	27	40
FBgn0037413	43.8553	1.17322	0.354785	0.000985553	0.00239502	TRUE	Osi5	protein_coding	3.29462	141.11	65.6134	66.6503	69.816	44.5591	115.811	44.5072	19.2584	33.2567	54.6476	24.1386	37.2569	185	83	88	86	52	157	47	19	34	63	13	33
FBgn0011704	586.035	1.1729	0.200809	5.20075e-09	2.89645e-08	TRUE	RnrS	protein_coding	5.84062	683.91	967.248	856.822	925.571	773.141	826.052	316.909	589.596	281.644	254.254	445.728	318.647	894	1220	1130	1143	914	1112	331	587	289	295	240	283
FBgn0039744	73.1892	1.17284	0.240774	1.11161e-06	4.49386e-06	TRUE	CG15526	protein_coding	4.87078	83.4899	73.989	90.8623	95.5743	102.032	91.8181	36.2326	14.402	57.2336	47.4373	50.182	29.5538	110	94	120	117	116	126	39	14	58	54	27	26
FBgn0019890	4651.08	1.17206	0.145337	7.37133e-16	8.02479e-15	TRUE	Smg5	protein_coding	8.06421	4577.95	9666.14	8587.63	8317.77	6970.45	6668.96	3364.54	4158.45	2874.66	3186.08	2850.08	3306.64	5960	12156	11332	10338	8377	8973	3474	4160	2967	3712	1538	2954
FBgn0031276	48.947	1.17205	0.623306	0.0604638	0.0921009	FALSE	CG12506	protein_coding	1.8774	5.27982	20.3895	55.3963	63.1788	178.355	151.079	3.66442	25.972	1.98536	15.9599	116.965	13.7331	7	26	73	77	199	209	4	25	2	18	63	12
FBgn0040063	212.985	1.16933	0.195888	2.40771e-09	1.39458e-08	TRUE	yip3	protein_coding	5.9676	272.57	295.483	386.023	278.83	378.428	394.063	150.688	85.7018	168.867	224.885	137.956	109.797	351	359	478	332	419	507	158	86	187	268	73	101
FBgn0267989	13.0621	1.16902	0.327542	0.000379752	0.00100981	TRUE	asRNA:CR46256	ncRNA	3.55377	11.4623	18.2143	21.2244	14.5963	23.8321	19.9946	10.4807	3.025	6.83557	13.832	3.71511	6.76532	15	23	28	18	28	27	11	3	7	16	2	6
FBgn0039131	1679.09	1.16868	0.184086	2.18199e-10	1.41657e-09	TRUE	CG12268	protein_coding	6.34795	1609.02	3486.73	3142.32	3148.88	3334.24	2726.03	1175.08	1776.45	1336.59	1269.07	762.101	1351.71	2107	4397	4145	3891	3948	3663	1226	1772	1373	1474	410	1201
FBgn0025692	359.028	1.16751	0.170283	7.14164e-12	5.33677e-11	TRUE	Lfg	protein_coding	6.85479	432.268	747.965	627.04	711.774	436.557	556.009	250.274	323.414	257.592	270.837	200.182	242.475	574	953	838	886	523	767	265	326	263	318	108	217
FBgn0038012	136.464	1.16562	0.182317	1.64857e-10	1.0861e-09	TRUE	CG10013	protein_coding	6.39095	169.855	189.514	242.65	167.592	225.668	217.002	110.175	51.1993	80.866	127.507	92.8575	70.9223	222	239	320	207	267	292	115	51	83	148	50	63
FBgn0265074	14.2988	1.16504	0.445537	0.00877126	0.016891	TRUE	lncRNA:CR44185	ncRNA	2.62084	22.8569	8.68556	16.6619	13.0202	32.8644	11.7544	7.52864	7.12894	5.88919	0.871269	22.3009	3.39501	30	11	22	16	38	16	8	7	6	1	12	3
FBgn0032689	2621.13	1.16459	0.111755	1.99511e-25	4.83558e-24	TRUE	CG10413	protein_coding	10.4207	3634.33	5095.38	4085.55	4432.67	3504.95	3748.05	1875.94	2409.77	1662.65	1524.71	1663.84	1747.45	4753	6418	5387	5474	4166	5023	1944	2395	1718	1788	894	1555
FBgn0050345	200.637	1.16451	0.221405	1.41729e-07	6.57075e-07	TRUE	CG30345	protein_coding	5.26299	189.084	245.154	178.222	206.312	179.486	173.419	74.9048	62.1245	75.9197	54.196	181.983	76.4979	247	309	235	255	213	233	78	62	78	63	98	68
FBgn0037279	1112.38	1.16449	0.140018	9.09944e-17	1.08176e-15	TRUE	CG1129	protein_coding	8.31598	1938.98	2453.52	1720.69	2078.73	1444.42	1849.34	836.2	1149.5	869.99	721.581	660.111	850.101	2504	3080	2261	2548	1701	2460	883	1145	901	841	360	753
FBgn0032405	2571.75	1.16446	0.203896	1.12899e-08	6.0053e-08	TRUE	firl	protein_coding	5.71012	5092.56	5932.71	3793.03	5530.5	4357.66	3934.32	1553.5	3191.49	2077.97	2168.87	1113.27	2499.04	6610	7424	4920	6759	5015	5228	1595	3092	2069	2457	607	2197
FBgn0053664	2.68369	1.16437	0.704851	0.106492	0.151152	FALSE	CG33664	protein_coding	1.61416	6.8432	1.57635	2.27136	2.4466	7.85923	6.58071	0	2.04878	2.95361	1.75075	0	2.26874	9	2	3	3	9	9	0	2	3	2	0	2
FBgn0036504	10.9984	1.16429	0.381439	0.00242819	0.00541819	TRUE	yellow-k	protein_coding	3.03215	16.04	18.2061	15.1583	17.0384	25.5974	14.0528	5.70575	4.03957	4.88644	12.1177	3.71539	13.5382	21	23	20	21	30	19	6	4	5	14	2	12
FBgn0035620	2.78031	1.16418	0.727887	0.122744	0.170626	FALSE	Alp9	protein_coding	1.54336	0.779117	4.03731	6.17667	3.90511	8.59888	7.89356	0.976036	0	0.991737	6.64646	0	1.146	1	5	8	5	10	11	1	0	1	8	0	1
FBgn0033412	8.26742	1.16364	0.439151	0.00893442	0.017165	TRUE	CG13955	protein_coding	2.61455	9.94327	16.6464	14.4061	26.7284	8.4671	14.8498	5.74018	8.04029	10.7234	1.72458	11.1435	2.25242	13	21	19	33	10	20	6	8	11	2	6	2
FBgn0263855	264.099	1.16346	0.118039	6.59595e-23	1.3186e-21	TRUE	BubR1	protein_coding	9.85386	350.124	482.769	512.784	408.157	412.721	391.644	206.243	218.816	192.434	187.118	185.668	144.969	457	608	676	505	492	525	214	219	198	218	100	129
FBgn0010053	921.124	1.16326	0.180994	1.3043e-10	8.66928e-10	TRUE	Jheh1	protein_coding	6.42667	1498.35	1984.86	990.981	1806.22	946.692	1360.19	588.334	563.851	570.305	519.118	861.769	698.263	1959	2504	1307	2230	1118	1832	615	561	585	602	464	620
FBgn0266915	1.43276	1.16293	0.759329	0.101846	0.145682	FALSE	lncRNA:CR45375	ncRNA	1.63597	1.48365	3.1159	3.07336	1.65315	0	0	0	0	1.00224	0	0	1.16334	2	4	4	2	0	0	0	0	1	0	0	1
FBgn0035267	1213.12	1.162	0.141959	2.73003e-16	3.0904e-15	TRUE	CG13921	protein_coding	8.18469	1882.38	2655.05	1997.74	2552.76	1812.9	1932.18	935.238	1282.81	927.065	873.887	630.962	1040.51	2532	3445	2707	3233	2170	2631	980	1309	975	1004	344	941
FBgn0052801	25.1857	1.16147	0.279312	3.4092e-05	0.000109012	TRUE	CG32801	protein_coding	4.14426	62.5982	41.9303	33.3432	44.6539	28.2407	45.0502	16.1291	25.2941	13.6949	17.336	16.7207	22.5787	82	53	44	55	33	61	17	25	14	20	9	20
FBgn0265153	17.3156	1.16035	0.460185	0.0114902	0.0213587	TRUE	lncRNA:CR44222	ncRNA	2.52742	12.2286	15.8414	10.6127	43.7791	17.8562	19.2637	19.0707	1.0077	4.88098	6.91264	14.86	3.38189	16	20	14	54	21	26	20	1	5	8	8	3
FBgn0032095	11.7054	1.16033	0.398339	0.00378512	0.0080551	TRUE	Toll-4	protein_coding	2.89554	19.1484	14.2887	25.7891	22.6381	18.4821	11.1815	7.70105	5.00044	16.5301	11.1665	5.57032	0	25	18	34	28	22	15	8	5	17	13	3	0
FBgn0085191	71.5282	1.16009	0.313251	0.000214915	0.000603299	TRUE	CG34162	protein_coding	3.70081	78.043	80.089	144.832	106.058	114.934	101.075	45.9902	11.0422	61.3779	84.4254	35.2857	30.3944	102	101	191	131	136	136	48	11	63	98	19	27
FBgn0037405	81.8536	1.15998	0.220039	1.38949e-07	6.44756e-07	TRUE	CG1077	protein_coding	5.26663	102.586	152.338	138.788	158.565	143.203	118.362	56.6739	42.0753	47.6878	104.073	63.1361	43.8704	134	192	183	196	170	159	59	42	49	121	34	39
FBgn0016031	1472.25	1.15974	0.142198	3.48925e-16	3.91021e-15	TRUE	lama	protein_coding	8.15509	2245.93	3065.13	2327.48	3491.89	2207.96	2387.04	1141.02	1306.98	1141.96	1080.35	903.476	1415.65	2926	3913	3067	4342	2609	3201	1170	1314	1155	1248	488	1251
FBgn0265542	11.3372	1.15944	0.326534	0.00041623	0.00109914	TRUE	lncRNA:CR44392	ncRNA	3.52957	11.4506	22.1513	16.6712	18.6741	18.8298	14.7695	8.53803	4.04741	3.91301	7.80173	13.005	9.03178	15	28	22	23	22	20	9	4	4	9	7	8
FBgn0035955	320.439	1.15938	0.206357	1.94043e-08	1.00546e-07	TRUE	CG5194	protein_coding	5.61723	420.458	418.792	557.25	451.628	558.76	515.358	243.754	114.964	253.881	346.681	165.288	161.224	550	529	735	557	656	696	256	114	260	401	89	143
FBgn0263023	177.666	1.15909	0.284066	4.52545e-05	0.000141975	TRUE	CG43318	protein_coding	4.07887	231.13	249.84	313.448	194.926	310.105	300.471	134.485	48.1569	141.789	217.129	83.6402	69.2037	304	317	414	239	355	411	144	47	144	248	45	61
FBgn0052391	62.6629	1.15894	0.314501	0.000232263	0.000647348	TRUE	CG32391	protein_coding	3.68106	83.0894	89.2671	121.194	96.7834	101.787	87.537	58.4646	13.2182	45.1132	78.3151	29.7322	23.7504	109	113	160	119	118	119	62	13	46	90	16	21
FBgn0034667	56.2614	1.15765	0.296623	9.73561e-05	0.000289292	TRUE	comr	protein_coding	3.89709	80.3645	89.6343	94.7941	77.6896	127.378	85.5468	45.0968	11.0295	55.4993	70.5782	31.5695	25.8807	105	113	125	96	151	115	47	11	57	82	17	23
FBgn0032313	395.062	1.15657	0.238985	1.3064e-06	5.21793e-06	TRUE	CG14070	protein_coding	4.83878	579.012	512.483	630.965	552.154	621.554	605.989	252.297	109.229	298.501	487.914	185.952	203.946	759	644	831	687	728	814	264	107	304	565	100	180
FBgn0266152	24.361	1.15589	0.33363	0.000552056	0.00141969	TRUE	lncRNA:CR44858	ncRNA	3.45414	27.4259	49.7402	34.0805	48.8318	51.0522	27.1752	13.17	3.05621	18.652	32.2454	18.5841	16.9772	36	63	45	60	59	37	14	3	19	37	10	15
FBgn0267642	4.47329	1.15523	0.544814	0.0362292	0.0588306	FALSE	lncRNA:CR45980	ncRNA	2.09435	4.5344	2.35512	9.85548	5.73655	6.24216	13.0383	0.919555	1.03631	2.97323	0.884409	3.7149	7.99425	6	3	13	7	7	18	1	1	3	1	2	7
FBgn0266730	86.5577	1.15454	0.201828	1.08084e-08	5.77094e-08	TRUE	lncRNA:CR45203	ncRNA	5.71753	136.071	96.9257	120.382	106.861	139.868	138.127	62.538	33.8263	65.0006	70.9415	63.1947	31.7713	179	123	159	131	160	189	67	33	66	81	34	28
FBgn0262656	590.967	1.15446	0.213353	6.28998e-08	3.0671e-07	TRUE	Myc	protein_coding	5.41036	750.024	1445.1	851.624	1099.13	606.821	762.098	418.736	524.749	330.118	306.032	432.42	431.192	979	1820	1123	1361	725	1021	434	526	340	357	233	384
FBgn0005683	142.47	1.15424	0.135102	1.34379e-17	1.72193e-16	TRUE	pie	protein_coding	8.53986	192.599	208.354	222.687	219.729	204.603	236.418	110.629	83.4613	80.0416	123.076	80.0546	91.3914	251	262	294	272	243	317	115	84	82	144	43	82
FBgn0033685	23.1326	1.1539	0.272743	2.41275e-05	7.92239e-05	TRUE	OSCP1	protein_coding	4.22281	25.9837	43.5605	34.1116	21.8917	28.072	35.5559	15.2513	21.1676	9.76333	9.50692	20.4328	9.01927	34	55	45	27	33	48	16	21	10	11	11	8
FBgn0266200	11.3031	1.15357	0.418221	0.00620393	0.0124629	TRUE	lncRNA:CR44895	ncRNA	2.7368	14.5125	22.9557	15.1584	22.7176	21.3301	20.71	15.216	0	16.6136	5.19314	3.71538	7.89718	19	29	20	28	25	28	16	0	17	6	2	7
FBgn0029589	52.4898	1.15349	0.349459	0.000974825	0.00237116	TRUE	CG14810	protein_coding	3.29769	69.2878	78.2982	116.566	63.4617	50.1095	83.8192	38.5097	11.263	44.1075	62.6509	33.4739	7.96215	91	99	154	78	58	114	41	11	45	72	18	7
FBgn0035587	196.643	1.15293	0.339826	0.000686474	0.00172952	TRUE	Gdap1	protein_coding	3.39493	206.284	328.687	227.456	285.758	161.334	240.739	118.173	63.0926	46.1566	46.7924	274.21	85.8183	270	416	301	349	189	323	124	63	47	55	147	75
FBgn0262098	300.035	1.15287	0.22445	2.7989e-07	1.24516e-06	TRUE	CG42851	protein_coding	5.13651	370.538	276.546	399.958	335.823	428.279	363.571	142.501	77.2273	236.274	235.7	124.501	142.471	486	350	528	413	497	494	151	76	241	271	67	126
FBgn0050187	74.2305	1.15214	0.159701	5.81869e-13	4.83334e-12	TRUE	CG30187	protein_coding	7.20466	159.888	136.369	119.046	142.516	105.724	123.321	52.6633	58.2522	57.4961	53.4334	57.573	73.1855	209	172	157	176	125	166	55	58	59	62	31	65
FBgn0266699	1.63583	1.15195	0.72025	0.120722	0.168429	FALSE	asRNA:CR45189	ncRNA	1.55175	3.05342	0.791097	1.51555	2.43582	6.84817	1.47685	0	0	0	1.73384	0	3.38702	4	1	2	3	8	2	0	0	0	2	0	3
FBgn0038887	528.724	1.1516	0.239754	1.56715e-06	6.18824e-06	TRUE	CG7907	protein_coding	4.80248	717.662	754.243	912.792	813.33	927.468	792.631	429.688	157.514	467.282	628.288	259.236	226.77	939	949	1202	1004	1101	1063	446	157	480	731	140	202
FBgn0085331	36.5039	1.151	0.242479	2.16389e-06	8.3795e-06	TRUE	CG34302	protein_coding	4.73748	64.0704	49.0081	51.5165	50.3883	75.6605	56.7335	24.5792	13.1913	36.2484	39.0955	16.7231	20.3425	84	62	68	62	88	77	26	13	37	45	9	18
FBgn0259140	239.164	1.14896	0.145262	2.56234e-15	2.65806e-14	TRUE	CG42255	protein_coding	7.91056	241.427	235.92	251.867	251.232	198.374	208.363	95.5782	126.717	118.484	91.7419	55.696	124.677	315	297	332	311	237	279	99	127	122	107	30	111
FBgn0030434	1077.92	1.14876	0.100997	5.66556e-30	1.98587e-28	TRUE	Brms1	protein_coding	11.3735	2017.73	1960.36	1513.99	1952.9	1306.64	1607.29	737.369	806.083	757.975	750.958	765.24	840.552	2639	2474	1997	2410	1540	2167	772	801	777	870	412	746
FBgn0039006	388.687	1.1484	0.169397	1.22233e-11	8.99229e-11	TRUE	Cyp6d4	protein_coding	6.77755	522.689	874.025	726.478	756.781	550.374	657.37	320.304	423.313	261.002	271.214	258.133	291.485	683	1102	958	935	652	884	334	422	268	315	139	259
FBgn0267629	6.4562	1.14826	0.47003	0.0158735	0.0284087	TRUE	lncRNA:CR45967	ncRNA	2.41181	13.687	8.67009	14.3857	12.2326	13.0971	3.65615	3.737	1.02434	6.89147	6.12723	3.71732	5.67167	18	11	19	15	15	5	4	1	7	7	2	5
FBgn0036492	211.207	1.14819	0.223994	2.97931e-07	1.32129e-06	TRUE	Best3	protein_coding	5.12475	270.086	261.673	382.174	267.174	341.45	357.464	150.416	66.2566	152.962	230.026	144.858	88.9336	353	330	504	330	404	481	157	66	157	267	78	79
FBgn0039659	139.345	1.14805	0.216861	1.20554e-07	5.64428e-07	TRUE	CG14506	protein_coding	5.29265	190.065	167.906	248.197	184.001	194.21	176.626	73.9549	52.4816	119.225	148.956	52.7991	65.0917	237	230	301	206	246	243	95	55	130	155	31	65
FBgn0263874	5.52477	1.14755	0.543788	0.0363502	0.0589912	FALSE	lncRNA:CR43721	ncRNA	2.09299	11.6326	6.09674	4.99365	8.46093	5.89402	10.0082	5.98357	0	4.11485	3.79726	1.77158	2.50045	17	8	6	10	6	14	7	0	4	4	1	2
FBgn0031592	109.964	1.14725	0.249897	4.46462e-06	1.65392e-05	TRUE	Art2	protein_coding	4.58849	159.429	141.199	181.37	150.606	193.964	170.053	73.2236	25.6344	108.894	118.641	56.2875	55.6445	204	181	234	183	241	226	80	27	113	136	30	50
FBgn0040649	209.388	1.14687	0.239863	1.74735e-06	6.85652e-06	TRUE	CG15461	protein_coding	4.78064	223.623	269.566	269.924	309.226	377.969	248.907	142.222	54.9629	171.188	203.806	85.5993	90.6878	310	349	342	371	398	349	162	52	169	222	47	76
FBgn0034568	5.24489	1.14636	0.549172	0.0389826	0.0625941	FALSE	CG3216	protein_coding	2.06437	9.23957	7.97991	9.91257	7.31523	5.06795	10.4904	8.70844	0	0	2.59069	1.86659	6.78093	12	10	13	9	6	14	9	0	0	3	1	6
FBgn0010109	27.7317	1.14612	0.35807	0.00142328	0.00333986	TRUE	dpn	protein_coding	3.18989	22.9623	61.8742	58.3938	41.2703	46.3847	55.0542	16.3147	37.0937	15.5775	29.2607	3.71403	19.1282	30	78	77	51	55	74	17	37	16	34	2	17
FBgn0030040	777.521	1.14448	0.158305	4.87146e-13	4.07903e-12	TRUE	CG15347	protein_coding	7.22884	1135.96	1478.37	1292.98	1351.87	963.287	1375.27	552.991	573.391	494.418	472.045	679.13	644.097	1488	1870	1707	1663	1125	1864	583	567	506	544	365	571
FBgn0086367	3802.9	1.14432	0.251972	5.58353e-06	2.03704e-05	TRUE	t	protein_coding	4.54158	7783.14	6454.57	4522.43	4093.25	3301.79	5167.05	2119.42	1781	1574.2	1292.26	4353.34	2772.09	10103	8129	5845	5101	3857	6881	2252	1818	1633	1520	2380	2500
FBgn0262036	852.408	1.14357	0.168239	1.06563e-11	7.86542e-11	TRUE	CG42847	protein_coding	6.79735	1106.66	1008.55	1018.19	1087.51	1110.43	920.078	426.222	282.164	627.083	652.579	405.07	406.887	1451	1276	1344	1338	1291	1249	451	278	640	751	218	360
FBgn0053641	1.0221	1.14312	0.794446	0.135737	0.186154	FALSE	CG33641	protein_coding	1.49186	0	0.789538	3.02938	4.06925	0	2.20348	0	0	0	0	1.8584	1.13179	0	1	4	5	0	3	0	0	0	0	1	1
FBgn0054026	2.82938	1.14275	0.778824	0.0629568	0.0955352	FALSE	CG34026	protein_coding	1.8595	0.73234	2.1212	2.06634	2.23269	4.92561	6.83083	0	1.41701	0	0	5.02637	0	2	2	2	2	4	7	0	1	0	0	2	0
FBgn0036880	2740.39	1.14273	0.436697	0.00927856	0.0177267	TRUE	Cpr76Bc	protein_coding	2.60162	7860.9	4003.93	3834.22	7258.84	4247.47	6587.73	1207.32	4173.01	1814.39	3817.39	127.513	3218.44	9858	4864	4850	8604	4817	8509	1212	3976	1781	4239	77	2738
FBgn0266031	24.3094	1.14263	0.273955	3.18618e-05	0.000102384	TRUE	lncRNA:CR44796	ncRNA	4.15973	31.7279	36.1035	42.4637	37.7083	44.6389	31.8566	10.1061	9.33191	30.735	21.238	18.5727	9.14059	42	46	56	46	50	44	11	9	31	24	10	8
FBgn0267599	1.41146	1.14227	0.786373	0.111288	0.15706	FALSE	lncRNA:CR45937	ncRNA	1.59243	0.75703	0.785789	0	0.818562	4.43705	0.725831	0	0	0.989556	0	0	0	1	1	0	1	5	1	0	0	1	0	0	0
FBgn0028518	99.3458	1.1418	0.322367	0.00039527	0.00104857	TRUE	CG18480	protein_coding	3.54322	58.1838	146.752	137.112	166.062	135.577	144.672	45.7611	60.4562	30.646	42.858	137.616	34.5368	85	190	182	205	169	196	45	57	32	48	70	29
FBgn0034736	196.931	1.14173	0.209871	5.26758e-08	2.59416e-07	TRUE	gas	protein_coding	5.44203	211.237	241.132	226.745	205.563	191.525	227.607	91.1393	98.2749	65.2401	64.5593	187.561	86.6479	276	304	299	254	227	306	95	98	67	75	101	77
FBgn0015033	228.274	1.13986	0.247932	4.27268e-06	1.58808e-05	TRUE	Cyp4d8	protein_coding	4.59766	323.594	290.173	301.025	255.08	248.695	267.425	92.8692	146.647	153.005	108.598	100.289	147.501	423	366	397	315	294	360	97	146	157	126	54	131
FBgn0085345	15.8343	1.13955	0.308327	0.000230348	0.000642811	TRUE	CG34316	protein_coding	3.68317	24.4238	20.5655	17.4282	17.8657	22.2744	33.2157	9.47971	5.06229	7.82843	16.478	16.7213	5.64609	32	26	23	22	26	45	10	5	8	19	9	5
FBgn0264310	114.069	1.13885	0.213446	9.66719e-08	4.59493e-07	TRUE	lncRNA:CR43785	ncRNA	5.33287	174.51	136.515	179.186	141.001	215.77	191.528	80.0441	39.0879	100.098	109.341	56.1643	76.3057	232	169	228	175	208	272	92	39	98	125	30	70
FBgn0032089	101.386	1.13828	0.285173	6.64212e-05	0.000202885	TRUE	Rcd-1r	protein_coding	3.98875	190.304	129.105	167.528	147.556	201.543	120.762	79.1364	18.1399	65.4075	134.804	70.5853	54.1116	249	163	221	182	237	163	83	18	67	156	38	48
FBgn0264901	1.07797	1.13813	0.799572	0.178161	0.236133	FALSE	lncRNA:CR44092	ncRNA	1.34644	0	3.93162	1.51477	4.08939	0	2.90788	0.92536	0	0	1.76146	0	0	0	5	2	5	0	4	1	0	0	2	0	0
FBgn0036522	619.736	1.13808	0.171888	3.59067e-11	2.51605e-10	TRUE	Phs	protein_coding	6.62005	899.377	1180.63	1162.08	994.222	981.889	930.793	480.749	686.609	434.495	523.697	256.225	377.632	1174	1487	1532	1230	1170	1248	499	687	447	610	138	336
FBgn0265532	5.6641	1.13723	0.50478	0.0254625	0.0431285	TRUE	asRNA:CR44382	ncRNA	2.23431	4.52965	10.1996	12.1358	13.1211	2.68272	6.51173	2.75282	8.30197	0.991986	2.65699	1.85701	3.42995	6	13	16	16	3	9	3	8	1	3	1	3
FBgn0036786	125.744	1.1356	0.210647	7.17423e-08	3.46691e-07	TRUE	skl	protein_coding	5.38675	136.115	345.53	208.495	256.019	177.19	196.632	89.8389	134.783	89.7243	75.9294	102.153	101.389	178	436	275	316	209	265	94	134	92	88	55	90
FBgn0015222	19314	1.13436	0.0970544	1.47128e-31	5.94329e-30	TRUE	Fer1HCH	protein_coding	11.6878	27878	35731.6	30197.5	36508.6	28183.9	30112.8	13561.8	17274.2	14729	13576.6	11867.8	14654.1	36809	45666	40392	45830	33320	40925	13689	16995	14407	15021	6229	12650
FBgn0011224	5102.79	1.13425	0.137291	1.43812e-16	1.66905e-15	TRUE	heph	protein_coding	8.26153	6624.41	8429.32	9156.3	8352.35	8154.18	8328.6	4066.64	4021.32	3645.36	4966.53	2860.88	2649.34	7057	8551	9030	8003	7340	8641	4585	5025	3696	4910	1788	3046
FBgn0263316	1491.49	1.13312	0.222055	3.34355e-07	1.47197e-06	TRUE	Mrp4	protein_coding	5.10298	1384.43	2786.29	2191.48	2348.68	1695.21	1832.97	873.214	905.194	591.863	570.772	1676.58	886.656	1807	3509	2889	2906	2021	2457	906	906	609	665	903	789
FBgn0035693	1065.48	1.13277	0.217755	1.97724e-07	8.97771e-07	TRUE	CG8219	protein_coding	5.20146	1548.41	1574.6	1983.38	1640.89	1804.93	1656.13	805.948	343.28	979.535	1259.96	583.05	610.592	2022	1984	2615	2029	2146	2223	838	343	1007	1466	314	543
FBgn0033584	598.156	1.13261	0.119056	1.87534e-21	3.3315e-20	TRUE	CG7737	protein_coding	9.51172	1156.5	1131.12	960.848	1249.38	871.769	916.456	487.359	605.312	480.962	449.611	336.246	485.019	1510	1425	1268	1545	1035	1231	509	604	494	523	181	431
FBgn0037853	274.06	1.13204	0.170471	3.16403e-11	2.23715e-10	TRUE	CG14696	protein_coding	6.63873	407.776	519.341	429.179	561.119	382.178	407.914	196.338	286.184	193.908	181.818	154.145	208.282	533	655	566	693	452	549	205	285	199	211	83	185
FBgn0037797	20.6097	1.13189	0.381541	0.00323293	0.00699811	TRUE	CG12420	protein_coding	2.94468	49.5916	40.3241	35.6101	44.6857	36.9182	34.6546	5.67834	30.4148	12.73	27.7817	1.85804	24.8549	65	51	47	55	43	47	6	30	13	32	1	22
FBgn0051469	14.0247	1.13036	0.505907	0.0233666	0.0399487	TRUE	CG31469	protein_coding	2.26739	6.8417	12.6088	16.6566	12.2356	13.1109	16.0792	5.60093	3.07486	0.98484	0.875763	24.1625	1.13465	9	16	22	15	15	22	6	3	1	1	13	1
FBgn0026063	849.028	1.13034	0.144147	4.47711e-15	4.5478e-14	TRUE	KP78b	protein_coding	7.84079	1253.18	1415.45	1458.68	1497.67	1499.06	1407.71	688.374	820.904	629.513	819.742	388.399	512.136	1679	1950	1954	1976	1771	1909	757	946	661	951	208	477
FBgn0266437	51.1282	1.12845	0.347495	0.0011859	0.002833	TRUE	CG45067	protein_coding	3.24225	78.1071	92.8543	106.184	67.9351	65.6147	78.218	48.0809	11.0102	53.503	59.3074	16.7117	23.615	102	117	140	84	78	105	50	11	55	69	9	21
FBgn0038610	1662.7	1.12785	0.32047	0.000437848	0.00115214	TRUE	CG7675	protein_coding	3.51615	3624.98	3217.14	2813.22	3599.06	2735.45	2881.22	1764.12	2738.24	1030.73	1239.97	250.548	1328.08	4750	4025	3678	4396	3200	3857	1851	2724	1058	1453	136	1180
FBgn0051089	1.66267	1.12649	0.743535	0.149366	0.202378	FALSE	CG31089	protein_coding	1.44177	4.58841	3.17018	6.06541	4.05064	0.847524	0	2.86793	1.00564	0	0	0	2.25292	6	4	8	5	1	0	3	1	0	0	0	2
FBgn0031197	16.4402	1.12508	0.271445	3.70581e-05	0.000117774	TRUE	CG17601	protein_coding	4.1251	28.2495	26.9025	27.2819	25.976	23.9432	25.8585	15.1895	6.06763	20.5375	8.6647	11.1469	9.0299	37	34	36	32	28	35	16	6	21	10	6	8
FBgn0040475	1777.74	1.1247	0.106904	6.96692e-26	1.75103e-24	TRUE	SH3PX1	protein_coding	10.5203	2419.68	3232.05	2892.46	3073.87	2365.22	2652.23	1262.51	1461.21	1082.45	1062.58	1487.44	1256.68	3161	4074	3814	3799	2806	3564	1315	1458	1112	1235	801	1117
FBgn0034834	190.43	1.12466	0.218996	2.84125e-07	1.26257e-06	TRUE	LS2	protein_coding	5.13368	272.247	270.259	327.533	275.442	286.456	336.931	137.663	87.4895	141.397	247.591	100.295	79.9781	356	341	432	340	338	454	144	87	145	287	54	71
FBgn0002633	96.0568	1.12359	0.378494	0.0030923	0.00673099	TRUE	E(spl)m7-HLH	protein_coding	2.95841	138.213	246.902	133.383	242.675	190.558	183.29	66.49	198.123	84.0871	66.6955	13.0044	66.5851	181	312	176	299	223	248	70	196	86	77	7	59
FBgn0031643	1512.36	1.1233	0.120885	1.51557e-20	2.49137e-19	TRUE	CG3008	protein_coding	9.2919	1684.97	2642.84	2320.7	3153.61	2008.52	2267.32	1082.44	1172.21	1001.49	929.849	1099.32	1150.79	2201	3331	3060	3898	2384	3046	1127	1170	1029	1081	592	1023
FBgn0031283	40.3696	1.1222	0.268834	3.07437e-05	9.90348e-05	TRUE	CG15880	protein_coding	4.16789	54.9493	63.2735	65.1647	39.7956	80.5649	64.2032	27.4821	21.2673	39.1475	44.2397	18.5794	11.2933	72	80	86	49	94	87	29	21	40	51	10	10
FBgn0035243	475.116	1.12119	0.184998	1.36507e-09	8.1638e-09	TRUE	CG13926	protein_coding	6.05955	455.609	821.169	942.907	919.568	615.82	797.064	334.064	531.64	351.397	282.301	263.894	304.424	598	1040	1245	1130	712	1085	355	522	358	324	142	269
FBgn0050383	27.037	1.12029	0.25892	1.58829e-05	5.35346e-05	TRUE	CG30383	protein_coding	4.31607	33.5956	50.6418	45.4702	36.5271	39.3276	42.8553	18.0403	10.1115	26.4037	32.0563	7.4312	13.5443	44	64	60	45	46	58	19	10	27	37	4	12
FBgn0034423	461.986	1.11969	0.245532	5.12597e-06	1.88153e-05	TRUE	tbrd-2	protein_coding	4.55957	554.283	695.057	783.436	652.042	807.741	670.758	347.759	138.238	383.435	549.58	274.827	183.351	724	876	1033	806	959	901	362	138	394	639	148	163
FBgn0031762	250.509	1.11936	0.261851	1.94725e-05	6.47274e-05	TRUE	CG9098	protein_coding	4.27086	528.015	675.397	387.912	562.684	302.36	439.817	263.685	391.341	198.635	169.422	110.197	169.283	652	821	487	676	345	565	265	373	202	194	62	148
FBgn0003174	2883.31	1.11845	0.24253	4.01367e-06	1.49715e-05	TRUE	pwn	protein_coding	4.61067	6478.08	5920.14	4534.24	5253.85	3558.25	4427.33	2908.74	3269.12	1721.72	2193.06	916.067	2631.46	8424	7641	6059	6658	4311	6048	2966	3222	1761	2522	495	2307
FBgn0031004	127.616	1.11826	0.2865	9.42995e-05	0.00028085	TRUE	CG7992	protein_coding	3.90481	136.955	183.964	133.458	168.401	122.551	199.912	63.2319	59.2297	44.8169	53.4144	157.858	52.91	179	232	176	208	145	269	66	59	46	62	85	47
FBgn0035970	91.5777	1.11779	0.225533	7.30927e-07	3.04953e-06	TRUE	CG4483	protein_coding	4.95296	124.675	130.002	148.61	123.111	157.478	163.353	66.972	28.1399	66.2889	105.196	76.1474	41.6692	163	164	196	152	186	220	70	28	68	122	41	37
FBgn0037263	44.9038	1.11728	0.167322	2.58397e-11	1.84453e-10	TRUE	slx1	protein_coding	6.66852	74.1226	56.2268	56.8509	77.0361	62.9847	54.0594	29.5365	33.275	27.3423	28.5286	27.8634	27.0613	97	71	75	95	74	73	31	33	28	33	15	24
FBgn0065032	154.968	1.11722	0.137381	4.3284e-16	4.7922e-15	TRUE	Arpc3B	protein_coding	8.129	240.542	228.097	231.083	251.849	228.657	259.897	96.7175	151.461	94.7218	93.785	113.81	111.763	317	288	304	308	263	357	103	150	96	107	61	99
FBgn0267196	0.415803	1.11702	0.804951	0.174515		FALSE	lncRNA:CR45636	ncRNA	1.35784	0.62375	1.47922	0	0.898042	2.05005	0.724267	0	0	0	0	0	0	1	2	0	1	2	1	0	0	0	0	0	0
FBgn0034411	188.266	1.1164	0.220067	3.95187e-07	1.72088e-06	TRUE	CG18605	protein_coding	5.07126	286.108	233.882	326.805	254.271	352.748	294.907	131.164	57.2533	135.464	233.573	128.147	106.967	374	295	431	314	417	397	137	57	139	271	69	95
FBgn0265716	3.16003	1.11612	0.618364	0.0760908	0.112848	FALSE	lncRNA:CR44523	ncRNA	1.77383	2.21995	4.67	1.54013	8.2725	5.55549	7.8726	0.894536	1.05193	6.02019	1.80494	1.84338	0	3	6	2	10	6	11	1	1	6	2	1	0
FBgn0029754	31.8049	1.11602	0.215119	2.24195e-07	1.00946e-06	TRUE	CG15930	protein_coding	5.17807	42.8564	42.0362	47.7748	59.0847	41.3597	46.8504	25.8942	16.0491	20.4512	25.8291	27.856	12.3795	56	53	63	73	49	63	27	16	21	30	15	11
FBgn0265201	51.4647	1.11494	0.318239	0.000466326	0.00121948	TRUE	CG44261	protein_coding	3.49939	70.936	66.6749	86.4865	69.722	76.0865	99.8075	42.1792	8.30609	48.6219	58.4806	35.2803	16.0131	94	85	114	85	85	138	46	8	49	66	19	14
FBgn0034728	292.292	1.11494	0.226791	8.87001e-07	3.66063e-06	TRUE	rad50	protein_coding	4.91518	273.485	562.912	384.578	585.232	418.818	457.166	180.145	352.824	132.2	177.723	226.519	150.607	357	709	507	724	499	613	187	353	136	207	122	134
FBgn0051975	6.32722	1.11438	0.54489	0.0424011	0.0673567	FALSE	CG31975	protein_coding	2.02956	3.71504	19.2507	6.44636	9.9818	10.3046	11.7134	8.12249	2.0219	5.87968	1.73586	0	8.21158	4	20	7	16	10	13	7	3	6	3	0	6
FBgn0052971	250.826	1.1137	0.222621	5.6888e-07	2.41403e-06	TRUE	CG32971	protein_coding	5.00149	315.114	331.759	430.63	335.725	422.442	432.257	188.371	81.5879	194.524	277.68	160.257	127.397	420	427	580	421	494	598	203	82	202	326	88	115
FBgn0021776	69.7103	1.11354	0.485583	0.0226638	0.0388874	TRUE	mira	protein_coding	2.27905	27.748	162.526	295.273	119.353	81.4196	114.154	32.6157	185.426	38.3679	28.9038	28.8632	25.9744	37	205	388	148	96	152	35	187	39	34	15	23
FBgn0036128	0.784569	1.11319	0.793456	0.16115	0.216282	FALSE	Elo68beta	protein_coding	1.40122	3.05142	0	3.03049	0	0	1.47416	0	0	0	0	0	0	4	0	4	0	0	2	0	0	0	0	0	0
FBgn0052246	49.3237	1.11306	0.233892	2.02048e-06	7.86118e-06	TRUE	CG32246	protein_coding	4.75136	61.2152	70.5794	100.096	67.9996	91.2293	92.9215	38.3389	28.0993	37.0161	59.429	29.7138	24.7633	80	89	132	84	108	125	40	28	38	69	16	22
FBgn0037176	236.266	1.11203	0.223277	6.39252e-07	2.68785e-06	TRUE	CG14456	protein_coding	4.97896	278.199	314.659	425.164	351.713	422.681	419.751	202.623	77.2283	195.368	259.488	140.425	128.845	363	392	569	436	490	568	217	70	197	304	75	118
FBgn0266987	4.53257	1.11186	0.443917	0.0138212	0.0251269	TRUE	lncRNA:CR45438	ncRNA	2.46188	6.99803	6.13088	8.95171	7.56394	7.76109	7.13626	2.59111	1.05696	7.15636	4.6771	1.79294	1.22543	10	8	11	9	8	10	3	1	7	5	1	1
FBgn0039486	165.459	1.11171	0.435742			FALSE	CAH9	protein_coding	2.55441	51.1963	229.651	251.658	212.466	238.365	280.638	90.5018	45.3803	38.0862	28.5312	293.496	56.38	67	290	332	262	280	379	95	45	39	33	158	50
FBgn0053795	1.58668	1.11147	0.727442	0.148878	0.201804	FALSE	CG33795	protein_coding	1.44351	1.51596	3.14565	1.51474	2.45331	6.18618	3.63578	0.925746	0	0	0	0	5.69173	2	4	2	3	7	5	1	0	0	0	0	5
FBgn0032287	660.916	1.11093	0.320969	0.000534721	0.00137988	TRUE	CG6415	protein_coding	3.46273	1327.07	743.115	579.184	624.102	579.26	744.289	294.897	279.947	173.7	178.768	872.996	265.975	1736	938	764	770	682	1004	309	278	178	207	470	236
FBgn0036327	327.555	1.11092	0.251268	9.85776e-06	3.44988e-05	TRUE	CG10748	protein_coding	4.42027	429.464	413.397	551.079	455.714	583.802	531.005	248.706	104.857	282.198	413.203	146.746	145.45	562	522	727	562	686	717	261	104	289	478	79	129
FBgn0052667	1242.1	1.10991	0.611488	0.0669841	0.100786	FALSE	ssp7	protein_coding	1.83178	2668.62	1305.84	779.864	1188.68	825.257	1247	256.72	380.236	59.3003	25.3434	2279.89	131.088	3621	1680	1009	1435	887	1744	288	361	59	28	1239	112
FBgn0033865	215.826	1.10893	0.221977	5.90593e-07	2.49871e-06	TRUE	CG6220	protein_coding	4.99427	247.784	294.839	428.375	279.48	355.032	367.396	196.01	67.3684	169.666	224.276	124.439	116.019	324	372	565	345	419	495	205	67	174	260	67	103
FBgn0265914	46.0313	1.10838	0.245141	6.37714e-06	2.29709e-05	TRUE	asRNA:CR44703	ncRNA	4.51348	84.0705	66.5332	88.6917	72.1557	58.6748	85.9425	33.3717	26.2015	52.7158	48.3903	22.2901	21.419	110	84	117	89	69	116	35	26	54	56	12	19
FBgn0262969	49.2994	1.10749	0.237158	3.10074e-06	1.17827e-05	TRUE	lncRNA:CR43280	ncRNA	4.66403	81.4673	62.163	87.6427	68.4023	89.6783	68.3514	35.1686	26.7901	37.3637	60.8661	25.3753	19.5149	106	78	119	76	96	88	36	23	42	74	15	19
FBgn0030596	22.3578	1.10656	0.337409	0.00107627	0.00259729	TRUE	CG12398	protein_coding	3.26979	40.5645	52.3522	43.9843	29.134	18.5594	24.5475	17.2703	21.0572	13.6317	10.3288	3.71407	25.8811	53	66	58	36	22	33	18	21	14	12	2	23
FBgn0039941	298.211	1.10638	0.206666	8.68449e-08	4.14548e-07	TRUE	CG17167	protein_coding	5.3523	325.602	492.572	436.987	681.25	358.669	484.055	206.946	314.488	163.399	164.882	176.413	246.853	426	621	576	844	427	650	216	315	168	192	95	220
FBgn0034288	2.72649	1.1061	0.658156	0.10371	0.147861	FALSE	CG5084	protein_coding	1.62713	1.77312	4.33734	10.8124	2.6788	6.62718	4.03937	1.03574	0	6.46016	2.86576	0	1.24172	3	5	13	3	7	5	1	0	6	3	0	1
FBgn0051279	161.371	1.1053	0.183989	1.90741e-09	1.12074e-08	TRUE	CG31279	protein_coding	6.0055	180.316	215.807	321.198	235.527	260.584	252.818	119.66	73.9967	133.717	167.414	81.8997	92.6711	244	288	400	260	268	337	130	83	156	190	43	94
FBgn0034553	34.5698	1.10478	0.575483	0.0491954	0.0767919	FALSE	CG9993	protein_coding	1.96689	23.7219	33.3086	15.1662	15.38	25.3354	30.482	13.4212	2.00679	1.94806	0.861188	40.8562	1.12554	31	42	20	19	30	41	14	2	2	1	22	1
FBgn0030598	303.904	1.10312	0.380578	0.00381692	0.00811725	TRUE	CG9503	protein_coding	2.89291	653.12	517.387	468.712	608.265	489.883	676.192	292.192	483.632	135.244	246.758	24.1396	331.781	853	652	618	752	582	908	304	483	139	287	13	295
FBgn0038531	2.1235	1.10238	0.63265	0.0967992	0.139381	FALSE	CG14325	protein_coding	1.66057	3.82346	5.54751	3.79082	8.10185	0.847787	2.96805	1.91149	4.02335	0.97526	2.58849	0	0	5	7	5	10	1	4	2	4	1	3	0	0
FBgn0263143	146.585	1.10038	0.13768	1.35652e-15	1.44754e-14	TRUE	vret	protein_coding	7.98935	179.912	229.305	238.899	246.741	199.622	214.403	95.1044	85.1471	97.3189	125.57	116.987	88.8636	235	289	315	305	237	288	99	85	100	146	63	79
FBgn0014949	1.30098	1.09864	0.755376	0.172233	0.22915	FALSE	btn	protein_coding	1.36506	2.26413	0.784476	0.758606	5.74157	3.5797	2.16991	0	3.1143	0	1.77192	0	0	3	1	1	7	4	3	0	3	0	2	0	0
FBgn0038504	1920.94	1.09842	0.0928338	2.67456e-32	1.15821e-30	TRUE	Sur-8	protein_coding	11.8318	3216.24	3562.77	2829.15	3017.32	2304.5	2834.28	1406.98	1519.76	1261.54	1268.68	1492.7	1331.89	4178	4481	3642	3719	2728	3785	1468	1525	1298	1436	812	1197
FBgn0262988	52.6754	1.09768	0.216376	4.00837e-07	1.74257e-06	TRUE	CG43296	protein_coding	5.06856	59.3947	70.4745	85.9089	69.8656	87.5692	68.4902	36.4482	15.6352	44.774	49.8357	24.1132	28.7052	79	90	113	85	97	95	40	15	45	56	13	25
FBgn0041249	9.33898	1.09719	0.344205	0.00152324	0.0035515	TRUE	Gr22f	protein_coding	3.17022	16.8112	8.71113	12.8862	11.3528	11.9165	13.3294	4.7638	5.0418	8.78871	5.18712	1.85756	6.76538	22	11	17	14	14	18	5	5	9	6	1	6
FBgn0050087	24.9188	1.0968	0.211101	2.24179e-07	1.00946e-06	TRUE	CG30087	protein_coding	5.17808	46.531	40.3164	46.2144	27.6301	35.2353	47.1656	19.8592	21.3032	17.6319	17.372	16.7229	19.2104	61	51	61	34	41	64	21	21	18	20	9	17
FBgn0263335	23.375	1.09645	0.349727	0.00174059	0.00400628	TRUE	lncRNA:CR43416	ncRNA	3.13126	29.7216	26.8527	34.0836	24.4063	35.4141	34.5497	19.782	5.08822	19.6228	16.544	9.29175	11.3133	39	34	45	30	41	47	21	5	20	19	5	10
FBgn0266892	0.602182	1.09608	0.793603	0.180228	0.23853	FALSE	lncRNA:CR45352	ncRNA	1.34005	3.00994	1.56669	0.759862	1.64319	0	0	0	0	0	0	0	0	4	2	1	2	0	0	0	0	0	0	0	0
FBgn0036663	6160.65	1.09605	0.162332	1.46013e-11	1.06615e-10	TRUE	CG9674	protein_coding	6.75181	6235.86	11927	10527	10193.2	8020.89	8977.59	4255.21	5170.73	3292.2	3294.32	5855.75	4076.71	8153	15061	13885	12609	9574	11988	4426	5218	3382	3844	3151	3635
FBgn0031255	44.069	1.09579	0.188119	5.97171e-09	3.29995e-08	TRUE	BBS8	protein_coding	5.81755	50.526	73.7866	50.0543	72.0043	65.7159	68.4805	25.9321	36.0684	26.2784	27.5258	25.9974	33.7477	66	93	66	89	78	92	27	36	27	32	14	30
FBgn0051848	127.078	1.09442	0.268424	4.59916e-05	0.000144028	TRUE	CG31848	protein_coding	4.07512	160.163	168.353	219.698	160.121	257.192	187.841	91.6672	45.6755	137.177	145.987	53.8855	49.7312	210	213	290	197	299	255	97	45	140	168	29	44
FBgn0053194	4.67994	1.09421	0.555022	0.0551229	0.0850258	FALSE	CheA29a	protein_coding	1.91791	3.80708	13.4152	6.81541	16.2872	2.6029	11.0022	4.69387	9.184	0.982526	0.872629	5.57552	2.26503	5	17	9	20	3	15	5	9	1	1	3	2
FBgn0261976	89.9597	1.09403	0.215552	3.88976e-07	1.69667e-06	TRUE	Psf2	protein_coding	5.07428	96.6758	143.496	114.442	130.029	108.482	145.508	59.6315	61.5026	37.9672	49.2067	96.9751	42.676	124	180	152	161	127	198	63	61	39	57	52	38
FBgn0039592	5.138	1.09344	0.610967	0.082948	0.12177	FALSE	CG14062	protein_coding	1.73383	9.17114	19.0091	9.85457	15.4044	3.40182	4.44505	0	12.0939	3.90502	4.3208	3.71502	1.12735	12	24	13	19	4	6	0	12	4	5	2	1
FBgn0037063	1780.52	1.0933	0.0996605	5.33532e-28	1.60707e-26	TRUE	CG9391	protein_coding	10.9699	3388.75	3068.46	2450.32	3072.18	2202.55	2718.06	1209.55	1194.39	1296.26	1297.37	1379.91	1525.41	4428	3859	3227	3773	2595	3662	1280	1178	1335	1517	739	1352
FBgn0038342	363.912	1.09314	0.233294	2.80152e-06	1.07055e-05	TRUE	B9d1	protein_coding	4.68486	442.6	481.617	581.161	483.298	660.349	568.802	245.328	130.692	305.411	448.603	156.07	192.012	580	609	767	595	770	771	259	129	312	517	84	170
FBgn0266956	4.19404	1.09284	0.587578	0.0663671	0.0999938	FALSE	lncRNA:CR45407	ncRNA	1.83594	3.01145	3.13408	2.27894	9.03492	15.3022	7.21704	0.91319	0	7.95214	2.66584	3.71132	1.14659	4	4	3	11	17	10	1	0	8	3	2	1
FBgn0062565	13.9554	1.0919	0.441872	0.0140413	0.0254649	TRUE	Or19b	protein_coding	2.45621	9.17063	20.592	36.3855	21.892	11.91	40.74	7.62532	13.1042	9.76352	6.91432	13.0027	12.4017	12	26	48	27	14	55	8	13	10	8	7	11
FBgn0032175	497.042	1.09186	0.21835	5.74443e-07	2.435e-06	TRUE	CG13131	protein_coding	4.99962	706.319	855.89	853.357	746.079	833.383	726.42	445.087	145.921	465.606	553.757	276.65	292.218	922	1078	1125	923	993	974	462	146	479	645	149	260
FBgn0267797	21.0555	1.09184	0.305004	0.000353718	0.000947222	TRUE	lncRNA:CR46122	ncRNA	3.57241	31.2917	21.3556	32.5827	20.303	37.7038	30.9977	15.1648	6.07563	18.5939	20.8167	13.0055	4.5171	41	27	43	25	44	42	16	6	19	24	7	4
FBgn0266432	189.196	1.09112	0.189301	8.30432e-09	4.52024e-08	TRUE	CG45062	protein_coding	5.76216	255.846	291.356	332.246	216.042	342.646	282.385	143.293	73.115	157.303	199.529	118.888	103.507	334	367	440	267	407	379	149	73	162	232	64	92
FBgn0039490	4.33938	1.09091	0.584513	0.0687611	0.103053	FALSE	CG5882	protein_coding	1.81999	11.4856	7.14215	6.82597	15.3676	0.841527	6.70313	5.76801	6.00697	1.9458	0	1.85688	4.49848	15	9	9	19	1	9	6	6	2	0	1	4
FBgn0266228	7.03646	1.09088	0.405774	0.00793027	0.0154798	TRUE	lncRNA:CR44923	ncRNA	2.65502	11.4397	16.5974	5.30298	19.5083	6.8832	13.2577	4.72417	5.07588	4.89958	6.95264	3.71627	6.78193	15	21	7	24	8	18	5	5	5	8	2	6
FBgn0264488	0.648284	1.09087	0.713643	0.200743	0.262152	FALSE	CG43896	protein_coding	1.27944	0	0	5.17193	4.40525	1.10757	0.984369	0	0	0	0	0	0	0	0	6	5	1	1	0	0	0	0	0	0
FBgn0036836	129.403	1.09085	0.256979	2.21557e-05	7.3118e-05	TRUE	CG11619	protein_coding	4.24198	155.422	203.927	197.189	237.016	212.187	283.683	94.168	132.201	90.4969	74.8139	113.272	89.9817	203	257	260	293	252	381	98	132	93	87	61	80
FBgn0028939	658.302	1.09019	0.229331	2.00881e-06	7.8177e-06	TRUE	NimC2	protein_coding	4.75254	1576.94	1154.76	1246.21	974.918	706.063	1228.54	541.446	883.08	477.81	408.864	310.419	559.681	2072	1468	1628	1207	876	1661	572	880	494	498	175	510
FBgn0265364	83.0466	1.09008	0.244071	8.00504e-06	2.84545e-05	TRUE	lncRNA:CR44305	ncRNA	4.46505	117.712	89.5136	138.727	96.4638	116.424	90.4172	50.5599	19.1395	75.1531	68.2432	46.4367	38.3231	154	113	183	119	137	122	53	19	77	79	25	34
FBgn0262888	1.44448	1.0897	0.71632	0.133184	0.183006	FALSE	asRNA:CR43243	ncRNA	1.50167	0.761812	1.57901	2.27201	4.88335	2.59627	0.734411	0.940605	2.03767	0	0	1.85842	0	1	2	3	6	3	1	1	2	0	0	1	0
FBgn0036005	600.907	1.08968	0.189292	8.61795e-09	4.67956e-08	TRUE	pall	protein_coding	5.7559	454.775	1153.32	1189.4	1068.47	851.749	901.08	374.824	613.58	384.585	364.59	458.799	417.072	595	1456	1569	1318	1002	1216	393	609	394	422	247	370
FBgn0052756	515.538	1.08954	0.120265	1.32256e-19	2.00539e-18	TRUE	CG32756	protein_coding	9.0585	574.305	854.239	933.69	904.486	752.498	760.296	358.685	372.968	343.07	407.604	409.042	347.895	742	1086	1196	1103	875	1014	375	381	355	472	221	324
FBgn0032209	79.5715	1.0893	0.180796	1.73711e-09	1.02631e-08	TRUE	Hand	protein_coding	6.02066	104.359	127.099	129.503	141.63	96.0973	108.673	47.0166	41.7823	76.5846	60.1479	27.8767	70.1795	137	161	171	174	111	148	50	41	78	69	15	62
FBgn0039768	4.70112	1.08904	0.777945	0.0791494	0.116896	FALSE	CG15533	protein_coding	1.75564	0	0	2.27517	2.42724	1.68541	2.2328	0	0	0	0	0	1.12498	0	0	3	3	2	3	0	0	0	0	0	1
FBgn0030900	45.4103	1.08873	0.357728	0.00242919	0.00541888	TRUE	Him	protein_coding	3.03203	41.2188	127.359	103.056	85.2601	85.6302	74.5687	38.8814	96.1542	27.3952	28.6129	14.8631	25.9691	54	161	136	105	100	101	41	95	28	33	8	23
FBgn0265468	1.09451	1.08835	0.804356	0.153253	0.206927	FALSE	lncRNA:CR44361	ncRNA	1.42813	0	0.787015	3.02874	0	4.40059	0	0.928626	0	0	0	0	0	0	1	4	0	5	0	1	0	0	0	0	0
FBgn0003502	2719.32	1.08774	0.276575	8.40733e-05	0.000252511	TRUE	Btk29A	protein_coding	3.93248	3821.08	5312.39	4001.34	4515.05	2926.2	4169.38	1857.62	2877.3	1612.43	1611.76	1257.27	2152.97	5088	6818	5318	5677	3536	5645	1949	2943	1695	1891	663	1910
FBgn0034554	225.621	1.08756	0.261157	3.13598e-05	0.000100874	TRUE	CAH14	protein_coding	4.16336	275.993	287.613	376.027	327.405	345.473	350.756	148.953	62.4099	193.178	297.855	105.872	92.402	361	363	496	404	407	473	156	62	198	345	57	82
FBgn0265978	7.54136	1.08747	0.440398	0.014005	0.0254169	TRUE	lncRNA:CR44757	ncRNA	2.45713	13.5371	10.1807	6.08104	6.57482	13.5331	9.3744	4.55805	2.08409	7.95833	8.0067	1.85509	0	18	13	8	8	15	13	5	2	8	9	1	0
FBgn0264291	133.758	1.08625	0.181559	2.22633e-09	1.29432e-08	TRUE	Det	protein_coding	5.98037	115.658	242.901	247.6	203.732	197.592	199.923	88.0265	135.983	95.4031	88.2755	74.3444	78.2075	152	308	327	250	227	273	94	133	97	101	40	69
FBgn0031456	535.991	1.0859	0.167705	9.53163e-11	6.4283e-10	TRUE	Tnpo-SR	protein_coding	6.4742	490.833	1155.92	957.89	959.576	823.787	712.207	414.423	504.727	346.011	324.523	367.921	424.67	650	1477	1281	1204	995	969	417	506	361	370	198	366
FBgn0261385	913.007	1.08589	0.186584	5.91276e-09	3.26969e-08	TRUE	scra	protein_coding	5.81921	973.799	1786.58	1759.92	1549.34	1415.15	1363.38	626.673	1193.14	571.965	638.152	527.16	565.6	1272	2257	2334	1894	1702	1799	661	1148	587	731	293	511
FBgn0263246	8.80676	1.0857	0.3481	0.00204159	0.00463562	TRUE	CG43389	protein_coding	3.08411	10.6866	13.4481	17.4287	17.0516	22.2614	12.5519	4.74204	13.157	5.87019	6.93609	7.43154	4.51626	14	17	23	21	26	17	5	13	6	8	4	4
FBgn0265766	7.18337	1.08534	0.41136	0.00870743	0.0167908	TRUE	lncRNA:CR44573	ncRNA	2.62333	13.7722	9.51547	6.06627	8.09608	10.1415	9.66147	5.74863	2.00771	1.94852	6.89197	5.57143	3.37718	18	12	8	10	12	13	6	2	2	8	3	3
FBgn0263330	1.49862	1.08532	0.787208	0.150461	0.203597	FALSE	lncRNA:CR43411	ncRNA	1.4379	6.62089	0	0	4.1441	0	2.1443	0.890012	0	1.00589	0	1.83857	0	9	0	0	5	0	3	1	0	1	0	1	0
FBgn0037964	150.791	1.08266	0.213472	3.9867e-07	1.73363e-06	TRUE	CG14731	protein_coding	5.06959	198.246	198.319	271.495	213.628	273.213	218.743	109.415	60.1471	124.615	176.413	70.5663	93.3876	259	250	358	264	324	294	114	60	128	205	38	83
FBgn0034994	1.14202	1.08211	0.777637	0.174173	0.231515	FALSE	Ir60a	protein_coding	1.35892	0.765484	1.58668	3.79191	3.23649	1.68579	0	0	3.00656	0	0	0	0	1	2	5	4	2	0	0	3	0	0	0	0
FBgn0020653	10165.7	1.08192	0.117102	2.48728e-20	4.00038e-19	TRUE	Trxr-1	protein_coding	9.23904	13036.8	18656	15340.6	20559.3	12645.8	15384.7	7016.97	8981.58	7015.82	6874.91	7696.02	7408.67	16721	23051	19908	24952	14841	20300	7349	8957	7266	8097	4163	6669
FBgn0267983	1.35227	1.08159	0.785825	0.130897	0.180419	FALSE	lncRNA:CR46250	ncRNA	1.51057	0	1.58246	0	0.811773	1.71045	0.738766	0	0	0	0	0	0	0	2	0	1	2	1	0	0	0	0	0	0
FBgn0058053	53.9201	1.08152	0.360022	0.00268302	0.00591924	TRUE	lncRNA:CR40053	ncRNA	3.0019	78.7593	73.6988	71.2665	67.2497	89.891	51.9335	45.8654	18.1083	50.7182	57.8176	3.7147	15.7726	103	93	94	83	106	70	48	18	52	67	2	14
FBgn0030898	206.868	1.08121	0.220167	9.10013e-07	3.75066e-06	TRUE	Andorra	protein_coding	4.91016	289.344	249.224	275.086	285.763	313.963	275.518	112.934	55.635	161.386	209.73	117.044	127.56	379	315	363	352	367	373	119	55	165	242	63	113
FBgn0263088	58.9155	1.08063	0.291889	0.000215074	0.000603637	TRUE	lncRNA:CR43356	ncRNA	3.70062	71.0742	52.6104	90.9558	66.361	96.1796	77.5475	46.9432	14.4986	34.6725	63.635	22.2916	23.9706	94	67	120	81	108	107	51	14	35	72	12	21
FBgn0263399	1.30601	1.08023	0.782755	0.130108	0.17954	FALSE	CG43445	protein_coding	1.51367	1.51972	0	2.27133	0	0.875688	0	0	0	0	0	0	0	2	0	3	0	1	0	0	0	0	0	0	0
FBgn0267478	0.861517	1.07951	0.786755	0.150715	0.203865	FALSE	asRNA:CR45828	ncRNA	1.43701	0.755466	0.784893	2.27473	1.63937	0	0.724074	0.918925	0	0	0	0	0	1	1	3	2	0	1	1	0	0	0	0	0
FBgn0053696	112.311	1.07913	0.204973	1.42852e-07	6.61888e-07	TRUE	CNMaR	protein_coding	5.26154	119.456	207.927	207.057	247.483	132.923	164.623	83.6552	82.0804	62.2598	77.3607	115.126	88.8391	156	262	273	306	158	221	87	82	64	90	62	79
FBgn0286198	450.618	1.07826	0.21707	6.82088e-07	2.85644e-06	TRUE	LKRSDH	protein_coding	4.9664	935.314	774.739	710.383	684.886	565.01	670.996	305.978	488.08	310.335	269.978	348.693	305.293	1205	967	937	870	680	907	330	492	330	312	195	282
FBgn0039622	34.1104	1.07774	0.286852	0.000176252	0.000503261	TRUE	eIF4E6	protein_coding	3.75083	46.4882	39.0505	54.0978	41.9376	61.6529	63.8232	36.8249	9.03578	17.6027	37.6114	18.5645	20.3405	61	50	71	52	71	87	39	9	18	43	10	18
FBgn0052103	3666.79	1.07774	0.143766	6.56006e-14	5.99027e-13	TRUE	SCaMC	protein_coding	7.49639	4121.34	6782.58	5349.2	6148.32	4667.16	5341.36	2498.11	2543.55	2224.4	2142.43	3098.44	2762.63	5224	8114	6937	7475	5532	7046	2668	2642	2361	2587	1702	2515
FBgn0031653	4.28568	1.07765	0.641027	0.0913426	0.132402	FALSE	Jon25Biii	protein_coding	1.68836	4.57654	6.32374	3.0304	3.25079	5.15816	7.36836	0.945427	4.05862	5.87793	0	0	0	6	8	4	4	6	10	1	4	6	0	0	0
FBgn0085312	26.5955	1.07698	0.257001	2.8976e-05	9.37463e-05	TRUE	CG34283	protein_coding	4.18137	28.0843	24.401	44.6736	40.8429	52.7676	45.912	23.2286	14.4008	16.7748	24.5947	18.5862	11.3662	37	31	59	50	60	63	25	14	17	28	10	10
FBgn0036278	151.133	1.0767	0.298281	0.000304998	0.000829656	TRUE	CrzR	protein_coding	3.61102	251.217	194.477	137.288	152.007	135.288	140.125	75.0709	76.0182	78.7672	69.5842	70.558	95.5604	328	245	181	188	161	188	78	76	81	81	38	85
FBgn0267551	9.60305	1.07657	0.338753	0.00162401	0.00375898	TRUE	asRNA:CR45891	ncRNA	3.15156	12.1719	20.5013	16.6575	17.9324	13.0687	14.6401	6.55065	10.2299	7.87057	4.37204	3.71725	10.2033	16	26	22	22	15	20	7	10	8	5	2	9
FBgn0035904	1819	1.07462	0.115936	1.88535e-20	3.07337e-19	TRUE	GstO3	protein_coding	9.26864	2420.56	3546.09	2830.03	3748.61	2398.7	2608.67	1355.46	1461.92	1523.14	1248.63	1218.83	1489.79	3172	4484	3735	4615	2797	3536	1431	1443	1556	1439	656	1319
FBgn0262998	149.108	1.07459	0.224008	1.61025e-06	6.34882e-06	TRUE	lncRNA:CR43306	ncRNA	4.79704	197.692	145.812	197.608	190.019	199.974	163.055	85.9434	46.0976	86.6393	148.813	89.2162	53.3154	260	185	261	233	229	223	92	45	88	170	48	47
FBgn0034165	15.9042	1.07349	0.560742	0.0535454	0.0828623	FALSE	CG6435	protein_coding	1.9305	6.86269	22.1261	26.5137	17.0733	12.9177	19.8774	5.66499	2.03149	5.88114	8.69472	18.5819	4.52224	9	28	35	21	15	27	6	2	6	10	10	4
FBgn0039201	166.848	1.07321	0.247713	1.48629e-05	5.03469e-05	TRUE	CG13617	protein_coding	4.33071	254.065	256.074	268.32	259.318	251.576	227.788	112.343	54.5354	144.266	232.378	76.7556	82.7847	332	322	357	319	299	307	116	54	148	270	41	73
FBgn0035325	20.3161	1.07271	0.417666	0.0102599	0.0193222	TRUE	CG13806	protein_coding	2.56694	24.456	23.7609	34.8699	33.2418	24.6655	31.1139	17.1598	3.02364	6.83399	8.642	35.2928	10.1463	32	30	46	41	29	42	18	3	7	10	19	9
FBgn0260968	23.5217	1.07165	0.310329	0.000569302	0.0014602	TRUE	CG42591	protein_coding	3.44583	34.0492	19.6395	34.0999	40.1227	44.4322	31.9174	15.6725	4.13781	19.7999	28.2528	14.8634	10.2651	45	25	45	49	50	44	17	4	20	32	8	9
FBgn0085415	12.4432	1.07095	0.397444	0.00737604	0.0145593	TRUE	CG34386	protein_coding	2.67937	9.42494	20.579	33.502	21.2838	17.7563	17.1763	8.07063	7.38546	6.14618	16.8083	4.98046	9.47014	13	27	42	25	20	23	8	7	6	20	3	8
FBgn0036568	623.505	1.07067	0.2409	8.841e-06	3.12201e-05	TRUE	ATPsynbetaL	protein_coding	4.44374	871.035	778.98	1187.59	793.847	1086.25	1062.4	487.521	199.504	534.504	820.16	341.691	317.302	1138	982	1566	981	1288	1428	508	199	549	953	184	282
FBgn0031622	43.5385	1.07041	0.265083	5.49075e-05	0.000169705	TRUE	CG3251	protein_coding	4.03369	55.8527	57.0915	75.0696	59.1031	75.2256	58.7083	29.6983	13.0511	24.3575	52.5545	40.8574	18.0122	73	72	99	73	89	79	31	13	25	61	22	16
FBgn0003209	2021.23	1.07022	0.115397	1.79237e-20	2.92792e-19	TRUE	raw	protein_coding	9.27403	2521.84	3559.49	3044.98	3528.21	2594.34	2959.14	1385.32	1771.01	1250.59	1242.07	1500.93	1491.6	3366	4693	4100	4446	3111	3998	1433	1731	1233	1402	813	1299
FBgn0030485	598.73	1.06995	0.136994	5.7361e-15	5.76672e-14	TRUE	CG1998	protein_coding	7.80962	708.091	878.905	851.588	1075.26	854.249	908.251	436.608	626.527	329.577	358.504	373.994	374.019	878	1057	1066	1239	977	1157	436	561	335	427	210	316
FBgn0265496	1.26875	1.06987	0.778086	0.131811	0.18139	FALSE	lncRNA:CR44365	ncRNA	1.507	0	2.38076	0.758445	2.42641	0	0.744827	0	0	0.972872	0	0	0	0	3	1	3	0	1	0	0	1	0	0	0
FBgn0034200	1242.11	1.06907	0.173356	6.97309e-10	4.285e-09	TRUE	Gbp2	protein_coding	6.1667	2234.08	1917.88	1759.67	1682.94	1665.2	1610.93	726.527	857.652	716.004	607.813	1322.84	916.642	2856	2435	2322	2078	1941	2140	749	831	704	690	708	799
FBgn0261633	0.607057	1.06889	0.773239	0.227705	0.292379	FALSE	CG42716	protein_coding	1.20629	2.86874	3.08463	0	3.33917	0	0.713117	0	0	0	0.921357	0	0	4	4	0	4	0	1	0	0	0	1	0	0
FBgn0085466	131.636	1.06877	0.232203	4.25115e-06	1.58083e-05	TRUE	CG34437	protein_coding	4.59871	346.436	286.27	178.059	211.199	144.964	229.415	95.6531	131.722	137.052	72.8945	63.1716	152.487	454	362	235	260	169	311	101	130	140	84	34	135
FBgn0010278	1120.36	1.06772	0.154787	5.29155e-12	4.01762e-11	TRUE	Ssrp	protein_coding	6.89753	1241.15	2390.91	1685.99	2261.61	1610.3	1501.29	786.194	1130.52	803.692	813.377	753.901	774.915	1621	3013	2223	2796	1913	2016	818	1129	826	946	406	689
FBgn0031792	9.30727	1.06752	0.533377	0.0513852	0.0799468	FALSE	CG13983	protein_coding	1.94825	35.1017	25.3059	9.8501	14.6213	13.7238	17.7044	14.2064	14.1851	2.9368	15.6199	1.85799	1.12952	46	32	13	18	16	24	15	14	3	18	1	1
FBgn0052580	60.4948	1.06672	0.242905	1.13875e-05	3.94113e-05	TRUE	Muc14A	protein_coding	4.389	75.1257	85.0123	90.2822	87.2218	89.4596	76.2195	32.8544	23.9294	35.9202	68.5535	51.9808	23.5813	98	107	119	108	107	102	34	24	37	80	28	21
FBgn0267455	10.1293	1.06639	0.462124	0.0218114	0.037623	TRUE	lncRNA:CR45805	ncRNA	2.29364	3.05147	18.1831	20.4559	21.9396	16.3222	14.0052	5.67573	11.1561	3.9177	5.21062	0	14.689	4	23	27	27	19	19	6	11	4	6	0	13
FBgn0033312	15.4433	1.06556	0.443374	0.0161285	0.0288107	TRUE	CG8642	protein_coding	2.40599	22.1915	24.5849	12.8913	20.2368	15.2011	23.0474	5.75195	5.01696	6.8182	7.75067	22.2852	7.87877	29	31	17	25	18	31	6	5	7	9	12	7
FBgn0035571	999.22	1.06524	0.216103	8.25739e-07	3.42408e-06	TRUE	CG12493	protein_coding	4.92918	1130.3	1199.14	1739.33	1175.94	1518.2	1530.43	758.171	275.199	735.118	990.502	686.97	462.042	1479	1514	2295	1450	1785	2066	795	273	753	1146	370	410
FBgn0037412	392.232	1.06499	0.510749	0.0401196	0.0641626	FALSE	Osi4	protein_coding	2.05252	1483.98	535.837	547.49	718.251	581.635	1003.11	421.86	599.98	52.614	574.283	18.5561	477.506	1940	676	722	887	687	1351	441	597	54	666	10	424
FBgn0029603	545.613	1.06493	0.185335	9.16262e-09	4.95981e-08	TRUE	CG14053	protein_coding	5.74554	706.45	693.991	786.715	809.009	792.601	805.456	396.371	208.387	508.404	508.476	232.108	313.605	922	837	1037	973	933	1086	421	215	542	589	131	290
FBgn0266982	2.85119	1.06492	0.599565	0.0945896	0.136539	FALSE	lncRNA:CR45433	ncRNA	1.67167	2.98937	8.5919	3.8178	6.594	4.56395	7.90155	0.903893	2.094	2.99569	0	7.40404	3.46515	4	11	5	8	5	11	1	2	3	0	4	3
FBgn0267788	0.502301	1.06389	0.765392	0.209771	0.272552	FALSE	lncRNA:CR46119	ncRNA	1.2542	4.1826	1.53111	1.63416	0.841345	0	0	0	0	0	0	0	0	6	2	2	1	0	0	0	0	0	0	0	0
FBgn0264863	16.3988	1.0638	0.356776	0.00289506	0.00634405	TRUE	asRNA:CR44054	ncRNA	2.97867	32.8909	25.3672	13.648	16.198	11.0042	25.2481	7.65524	19.0924	3.89907	6.03521	11.1434	10.1353	43	32	18	20	13	34	8	19	4	7	6	9
FBgn0038847	5.59882	1.06346	0.604388	0.0829951	0.121827	FALSE	CG12278	protein_coding	1.73357	19.0711	3.95272	7.5762	12.1892	5.15538	8.84453	1.89163	7.10019	0	6.07962	0	7.90981	25	5	10	15	6	12	2	7	0	7	0	7
FBgn0262970	38.0064	1.06321	0.196748	6.67601e-08	3.2442e-07	TRUE	CR43281	pseudogene	5.39968	45.8678	42.782	47.7604	47.8189	43.3095	51.8973	17.1808	26.1792	26.3463	15.5437	20.4317	27.0472	60	54	63	59	51	70	18	26	27	18	11	24
FBgn0031522	102.874	1.06314	0.599158	0.078306	0.115792	FALSE	CG3285	protein_coding	1.7606	187.924	133.799	143.858	308.855	141.853	178.794	55.4636	115.314	34.0553	129.07	20.9469	100.055	246	169	190	382	168	241	58	115	35	150	11	89
FBgn0024352	4230.88	1.06268	0.119844	7.51342e-19	1.06701e-17	TRUE	Stip1	protein_coding	8.86701	4901.62	7585.84	7124.03	7572.01	5367.49	6182.97	2966.24	4002.28	2878.01	2886.57	2696.39	3033.55	6404	9563	9394	9357	6364	8311	3091	3992	2956	3354	1452	2696
FBgn0260867	11.4984	1.06207	0.314813	0.000798542	0.00198499	TRUE	CG42577	protein_coding	3.3533	13.4698	17.1933	18.3072	18.9466	14.573	22.2833	9.05307	9.41545	8.98037	10.7295	7.40758	2.30723	18	22	24	23	16	31	10	9	9	12	4	2
FBgn0040502	5.47751	1.05914	0.654417	0.109156	0.154498	FALSE	CG8343	protein_coding	1.602	6.84488	14.9786	9.84286	6.52257	6.10585	9.51071	5.60971	0	0	2.62469	11.152	3.4021	9	19	13	8	7	13	6	0	0	3	6	3
FBgn0265162	6.76274	1.05888	0.456685	0.0220614	0.0379705	TRUE	lncRNA:CR44231	ncRNA	2.28931	6.08639	7.09711	12.1146	8.96546	16.5485	19.0349	5.61616	4.0912	2.9512	13.1139	1.85864	2.26721	8	9	16	11	19	26	6	4	3	15	1	2
FBgn0038626	122.784	1.058	0.257446	3.99059e-05	0.000126081	TRUE	CG7691	protein_coding	4.10802	172.779	152.123	216.063	143.446	199.495	174.256	84.0177	27.1803	97.5682	151.094	70.5815	65.3591	226	192	285	177	235	235	88	27	100	175	38	58
FBgn0267489	60.8404	1.05667	0.230631	4.66708e-06	1.72402e-05	TRUE	PRY	protein_coding	4.57922	92.6873	66.6872	90.2642	69.5228	94.8796	83.5114	31.7804	24.9937	46.6649	61.8287	51.9887	19.1086	121	84	119	86	113	112	33	25	48	72	28	17
FBgn0034468	5306.78	1.05629	0.445371	0.0184684	0.0324766	TRUE	Obp56a	protein_coding	2.35609	19821.2	10301.4	7379.6	7836.96	7152.46	11938.9	6783.3	14797.1	2091.05	2192.34	728.524	2545.15	26137	13095	9745	9587	8107	16406	7318	14360	2117	2492	392	2237
FBgn0031470	300.422	1.05628	0.132767	1.80844e-15	1.90893e-14	TRUE	CG18557	protein_coding	7.95382	428.574	492.445	579.078	510.229	462.002	477.294	225.551	336.086	236.428	193.789	178.333	235.737	561	622	764	629	542	645	237	333	242	224	96	209
FBgn0035160	473.118	1.05612	0.171435	7.32815e-10	4.49435e-09	TRUE	hng3	protein_coding	6.15884	979.288	879.407	761.25	843.294	782.792	790.986	423.712	663.608	345.377	393.867	244.218	323.283	1283	1126	1014	1053	931	1087	452	673	356	441	128	282
FBgn0051041	9.67425	1.05582	0.480842	0.0281693	0.0471944	TRUE	CG31041	protein_coding	2.19492	10.6624	14.2074	6.81567	12.2122	13.8659	15.4121	1.8792	6.11827	2.94652	10.4657	9.29244	2.26442	14	18	9	15	16	21	2	6	3	12	5	2
FBgn0263329	44.8501	1.05495	0.273513	0.000115477	0.000338696	TRUE	lncRNA:CR43410	ncRNA	3.85553	35.5175	52.5954	62.9262	39.3389	89.1951	61.5647	34.0168	16.5823	34.6908	31.8418	26.0045	15.9897	47	67	83	48	100	85	37	16	35	36	14	14
FBgn0264383	116.17	1.05495	0.242182	1.33938e-05	4.57272e-05	TRUE	lncRNA:CR43835	ncRNA	4.35357	176.072	176.941	208.298	165.118	147.569	191.216	82.0115	44.7512	91.2186	148.831	61.3237	72.3897	231	224	275	203	171	260	87	44	93	171	33	64
FBgn0040784	85.7128	1.0547	0.255874	3.79095e-05	0.000120186	TRUE	karr	protein_coding	4.11986	94.2311	91.7305	138.905	114.088	148.08	138.002	72.3018	25.9875	70.5078	86.9473	44.5525	38.932	125	117	183	139	165	191	79	25	71	98	24	34
FBgn0052205	135.132	1.05452	0.191174	3.49842e-08	1.75685e-07	TRUE	hpRNA:CR32205	ncRNA	5.51447	174.796	171.487	206.599	201.542	186.29	205.518	70.0085	60.0989	107.106	112.177	99.4275	98.2311	225	216	273	250	218	273	73	59	107	129	52	88
FBgn0265887	4.64381	1.05325	0.504305	0.0411298	0.0655703	FALSE	lncRNA:CR44676	ncRNA	2.04222	6.64124	4.66587	10.808	12.4202	3.71623	12.1585	1.78474	2.10567	6.02725	4.52132	3.68229	4.67636	9	6	14	15	4	17	2	2	6	5	2	4
FBgn0004372	163.263	1.05316	0.315132	0.000836082	0.00206844	TRUE	aly	protein_coding	3.34056	213.579	184.913	294.444	220.189	264.651	287.435	131.778	22.9627	156.306	192.6	104.989	75.2161	276	235	386	269	310	389	136	23	160	223	56	67
FBgn0262141	43.049	1.0528	0.23583	8.31932e-06	2.95112e-05	TRUE	CG42867	protein_coding	4.4568	54.8272	83.7461	74.5593	72.3715	60.6165	64.1141	25.4741	37.5583	58.742	17.818	24.106	29.8851	73	107	98	88	67	89	28	36	59	20	13	26
FBgn0031288	92.7684	1.0527	0.26654	7.80323e-05	0.000235407	TRUE	CG13949	protein_coding	3.95036	91.5686	84.9945	126.911	107.313	113.884	108.014	51.5366	12.8753	58.9671	79.1814	56.5474	39.2217	119	105	163	134	142	148	63	13	67	92	32	40
FBgn0035795	3.06959	1.05241	0.581752	0.0803873	0.118433	FALSE	CG16998	protein_coding	1.74844	10.6733	1.58014	5.30239	5.69227	3.44808	7.35847	0	2.03275	2.94152	5.21937	3.71651	1.13082	14	2	7	7	4	10	0	2	3	6	2	1
FBgn0040385	1.25421	1.05103	0.782098	0.198715	0.259872	FALSE	CG12496	protein_coding	1.28522	0	2.37825	1.51646	1.61974	4.23166	4.45594	0	2.00951	0	0	1.85723	1.1261	0	3	2	2	5	6	0	2	0	0	1	1
FBgn0035887	2.31191	1.05067	0.805152			FALSE	Jon66Cii	protein_coding	1.23299	0.762777	0.79049	0	0	1.71913	25.0543	0.945536	3.04369	0	2.60605	0	0	1	1	0	0	2	34	1	3	0	3	0	0
FBgn0040849	36.4252	1.05065	0.217622	1.41316e-06	5.62564e-06	TRUE	Ir41a	protein_coding	4.82314	44.4043	42.8464	61.4313	44.4937	47.1651	47.6465	24.9781	8.01353	33.0878	25.8012	29.7109	16.8726	58	54	81	55	56	64	26	8	34	30	16	15
FBgn0032929	154.208	1.05016	0.115321	8.56759e-20	1.31828e-18	TRUE	Mcm10	protein_coding	9.10575	175.365	203.176	216.92	179.534	168.207	143.042	84.6366	86.0682	94.3533	73.9116	103.983	85.4596	229	256	286	222	200	192	88	86	97	86	56	76
FBgn0038292	92.0295	1.0498	0.488328	0.0296102	0.0492757	TRUE	CG3987	protein_coding	2.17527	16.8268	71.3403	50.8	59.1279	67.744	74.2449	20.0889	8.04082	12.6736	7.76102	94.7204	11.2624	22	90	67	73	80	100	21	8	13	9	51	10
FBgn0030455	102.656	1.04949	0.302186	0.000517576	0.00134117	TRUE	CG4318	protein_coding	3.47149	142.257	145.846	175.903	139.322	147.374	136.596	78.4298	18.0942	72.1467	133.676	78.0056	36.0413	186	184	232	172	174	184	82	18	74	155	42	32
FBgn0267156	0.851033	1.04831	0.80323	0.203357	0.265299	FALSE	lncRNA:CR45596	ncRNA	1.27205	0	0.782617	2.2826	0.822443	4.5251	0.720325	0	0	0	0	3.70841	0	0	1	3	1	5	1	0	0	0	0	2	0
FBgn0040251	31.4813	1.04766	0.405995	0.0101825	0.0191925	TRUE	Ugt302K1	protein_coding	2.56957	31.5772	78.9715	46.5862	70.9552	56.0121	50.2521	17.2255	55.1217	12.4677	8.87533	48.9584	14.1282	37	99	61	85	64	77	21	49	14	9	28	12
FBgn0262901	2.5399	1.04728	0.718505	0.109598	0.154969	FALSE	lncRNA:CR43256	ncRNA	1.6	6.90747	1.21323	0	2.15745	1.44945	1.4391	0	0	0	2.82154	2.87243	0	6	1	0	4	1	3	0	0	0	2	1	0
FBgn0286827	83.4599	1.04602	0.371704	0.00501843	0.0103083	TRUE	lncRNA:CR43334	ncRNA	2.80585	33.9983	195.477	176.224	234.262	156.471	167.719	37.1053	124.606	39.4254	52.3473	83.1051	116.353	41	134	125	150	104	110	65	69	56	56	39	80
FBgn0020556	3.33135	1.04594	0.61355	0.084474	0.123673	FALSE	lncRNA:bxd	ncRNA	1.7253	2.46545	0.982481	3.35574	4.89595	1.21481	4.90358	1.02603	0	3.14716	1.2386	0	1.21157	3	1	6	5	2	6	1	0	3	2	0	1
FBgn0015572	114.079	1.04461	0.148602	2.1241e-12	1.67751e-11	TRUE	alpha-Est4	protein_coding	7.02608	209.657	196.666	156.209	139.241	136.862	186.574	76.67	78.283	99.3631	61.1555	85.4277	95.679	274	248	206	172	162	251	80	78	102	71	46	85
FBgn0050082	2.36859	1.04456	0.599408	0.0870357	0.126901	FALSE	CG30082	protein_coding	1.71125	5.34011	3.16231	3.78814	3.25028	3.43616	1.47426	2.83796	3.04249	0	0.868415	1.85807	0	7	4	5	4	4	2	3	3	0	1	1	0
FBgn0036730	139.823	1.04429	0.237611	1.11654e-05	3.86941e-05	TRUE	qjt	protein_coding	4.39328	203.802	154.189	224.099	178.442	253.254	207.296	77.8154	68.1788	107.492	170.827	65.502	88.3938	254	194	304	231	298	274	80	61	117	193	37	75
FBgn0052476	365.89	1.04174	0.192941	6.70234e-08	3.25397e-07	TRUE	mthl14	protein_coding	5.39897	561.837	638.605	502.042	478.221	419.036	462.072	249.572	126.298	220.013	267.613	402.969	213.772	734	805	662	591	497	621	260	126	226	311	217	190
FBgn0067052	78.7588	1.03968	0.243241	1.94548e-05	6.46824e-05	TRUE	Rab9D	protein_coding	4.27106	79.3718	84.629	143.969	109.64	154.267	138.003	66.338	34.4319	68.5073	80.6708	33.4429	51.9485	104	107	190	135	180	187	70	34	70	93	18	46
FBgn0264473	59.7432	1.0394	0.230924	6.9223e-06	2.48089e-05	TRUE	lncRNA:CR43881	ncRNA	4.49606	72.1284	88.2877	120.326	95.401	104.441	79.1144	48.1988	21.9604	57.9729	66.9021	33.5826	37.501	98	104	160	120	118	107	45	25	57	76	18	34
FBgn0263504	50.7411	1.03936	0.258791	5.89809e-05	0.000181256	TRUE	lncRNA:CR43493	ncRNA	4.01685	63.5318	70.6033	55.3611	81.7267	37.9414	63.9902	25.9168	35.083	22.3908	21.5125	57.567	21.3773	83	89	73	101	45	86	27	35	23	25	31	19
FBgn0037128	607.675	1.03931	0.75639	0.163368	0.218828	FALSE	CG14572	protein_coding	1.39383	96.1694	735.618	528.151	849.426	1301.29	1651.96	152.628	50.6217	12.721	2.60175	1519.78	3.38762	126	930	697	1046	1519	2238	161	50	13	3	818	3
FBgn0010222	734.153	1.03706	0.117499	1.09449e-18	1.53869e-17	TRUE	Nmdmc	protein_coding	8.82501	961.937	1460.43	1264.55	1429.45	1081.99	1226.73	556.905	640.38	564.174	628.197	519.164	691.215	1278	1901	1703	1792	1308	1707	577	632	571	732	275	619
FBgn0000140	625.086	1.03683	0.157445	4.55643e-11	3.1644e-10	TRUE	asp	protein_coding	6.58475	803.824	1041.96	1106.79	818.544	951.967	816.538	492.88	318.525	477.034	653.719	376.892	356.157	1049	1312	1459	1013	1136	1094	511	319	491	762	203	317
FBgn0086687	9040.3	1.03589	0.158676	6.65202e-11	4.54705e-10	TRUE	Desat1	protein_coding	6.5283	11438.6	13558	12023.8	13635.8	11989.7	11770.8	4986.92	6248.82	4978.75	4321.83	10114.4	5403.14	15016	17207	15953	16941	14273	15871	5174	6241	5113	5015	5438	4780
FBgn0000180	302.164	1.03569	0.161931	1.61807e-10	1.06731e-09	TRUE	bib	protein_coding	6.39381	414.359	669.167	537.774	543.337	393.233	545.61	254.1	364.072	246.993	227.644	172.681	231.59	541	843	709	672	468	732	264	364	254	265	93	206
FBgn0031471	163.15	1.03556	0.130009	1.70769e-15	1.80502e-14	TRUE	CG3117	protein_coding	7.96092	243.829	281.211	233.486	327.497	316.157	263.829	126.868	166.221	139.574	138.22	100.304	130.752	319	355	308	404	372	356	133	165	143	160	54	116
FBgn0031998	824.085	1.03408	0.135789	2.64326e-14	2.4968e-13	TRUE	SLC5A11	protein_coding	7.61469	1489.34	1602.27	1192.28	1485.75	830.448	1208.9	602.837	679.717	668.346	566.486	575.63	699.487	1945	2019	1572	1837	987	1623	627	679	687	659	310	622
FBgn0263607	200.18	1.03379	0.218633	2.2743e-06	8.7723e-06	TRUE	l(3)72Dp	protein_coding	4.72738	145.477	344.395	376.182	320.312	314.811	269.58	123.987	204.27	125.515	80.8206	178.262	143.96	190	434	496	396	374	362	129	204	129	94	96	128
FBgn0052625	45.8494	1.03351	0.264837	9.52776e-05	0.000283547	TRUE	CG32625	protein_coding	3.90231	51.666	74.0455	52.9978	65.2898	35.9169	65.7083	22.3655	25.6576	30.5511	22.7946	52.043	17.0304	68	94	70	80	41	90	24	25	31	26	28	15
FBgn0033960	393.876	1.03341	0.0908809	5.94687e-30	2.07054e-28	TRUE	CG10151	protein_coding	11.3693	506.395	670.88	677.66	643.644	529.087	620.032	296.193	274.954	280.689	330.601	311.613	285.665	658	835	887	784	630	832	307	277	292	387	166	256
FBgn0264433	80.2178	1.03339	0.260419	7.27067e-05	0.000220319	TRUE	CG43851	protein_coding	3.96725	97.3483	95.6982	125.178	68.0815	119.053	121.505	65.1027	18.6887	66.4829	65.5692	53.8488	29.7386	129	122	165	83	133	168	71	18	67	74	29	26
FBgn0001149	22013.8	1.03328	0.115384	3.39635e-19	4.98079e-18	TRUE	GstD1	protein_coding	8.95503	28700.3	45395.4	36517.1	44917.6	31191.9	31336.4	18737.6	17654.7	17072.3	15228.5	17969.1	19488.9	37632	57437	48206	55277	36283	42532	19818	17398	17425	17529	9670	17244
FBgn0267672	6.6106	1.03315	0.499586	0.0399539	0.0639499	FALSE	lncRNA:CR46008	ncRNA	2.05423	12.1952	8.68885	13.634	8.13412	6.90468	6.6186	3.77027	0	4.90443	12.1858	1.8583	1.13112	16	11	18	10	8	9	4	0	5	14	1	1
FBgn0051642	566.369	1.03245	0.215968	1.75446e-06	6.88095e-06	TRUE	CG31642	protein_coding	4.77983	773.765	791.606	941.864	814.972	974.526	987.027	443.215	213.601	542.374	711.884	324.983	308.333	1011	998	1242	1007	1155	1327	462	213	557	827	175	274
FBgn0001218	17273.4	1.03235	0.15367	1.84466e-11	1.32953e-10	TRUE	Hsc70-3	protein_coding	6.71782	24042.7	38274.9	28619.2	32749	22623.7	24112.3	14987.2	19320.7	12239.3	12547.1	9462.63	14207.9	31478	48739	38043	40825	27200	32590	15425	19177	12494	14478	5063	12531
FBgn0267197	0.670514	1.03155	0.804721	0.236078	0.301545	FALSE	lncRNA:CR45637	ncRNA	1.18485	2.24055	0.780881	0	3.29782	2.74151	0	0.903125	0	0	0	0	1.15581	3	1	0	4	3	0	1	0	0	0	0	1
FBgn0085252	0.605693	1.0303	0.773313	0.2416	0.30759	FALSE	CG34223	protein_coding	1.171	0	1.5236	2.50067	1.69296	3.93338	0	0	0	0	0	0	1.25187	0	2	3	2	4	0	0	0	0	0	0	1
FBgn0259834	857.8	1.03029	0.161397	1.73488e-10	1.14147e-09	TRUE	out	protein_coding	6.38314	1011.75	1445.83	1467.02	1252.99	1197.5	1249.54	609.929	631.831	565.267	743.421	523.432	628.427	1309	1835	1933	1586	1388	1643	635	684	583	828	279	574
FBgn0030120	151.444	1.02998	0.210758	1.03389e-06	4.21566e-06	TRUE	CG17440	protein_coding	4.88508	220.187	221.854	269.891	212.323	235.953	221.735	130.82	49.3212	113.172	164.892	94.7273	112.683	288	280	356	262	278	299	137	49	116	191	51	100
FBgn0085494	26.8424	1.02948	0.320676	0.00132207	0.00313245	TRUE	Mst77Y-16Psi	pseudogene	3.21115	23.68	34.0402	27.2856	29.2058	29.8504	36.9894	12.3667	6.05767	16.6115	26.8261	16.719	6.76841	31	43	36	36	35	50	13	6	17	31	9	6
FBgn0265067	183.241	1.02887	0.246593	3.02557e-05	9.75634e-05	TRUE	lncRNA:CR44178	ncRNA	4.17153	248.932	272.227	275.346	223.054	276.833	219.969	130.813	50.5085	170.508	194.235	105.967	75.5292	326	344	364	275	323	298	138	50	174	224	57	67
FBgn0037411	5202.43	1.02869	0.623006	0.116285	0.163185	FALSE	Osi3	protein_coding	1.57056	23099.5	7335.72	8410.25	10838.1	7463.97	8025.9	8943.44	7924.39	1217.7	5217.31	8.49827	5100.77	31450	9631	11035	13781	9253	11566	9851	8162	1300	6529	4	4738
FBgn0265892	20.5275	1.02661	0.434073	0.0184393	0.0324363	TRUE	lncRNA:CR44681	ncRNA	2.35668	19.5981	29.7904	34.1596	23.8039	55.6574	32.5094	13.7258	2.07927	23.8357	25.733	16.7069	8.01637	26	38	45	29	62	45	15	2	24	29	9	7
FBgn0035552	2.88177	1.02651	0.625076	0.10507	0.149432	FALSE	CG11350	protein_coding	1.62076	6.11898	6.34153	4.54929	1.61989	0	5.94003	1.91346	4.02004	0	2.58682	0	1.1262	8	8	6	2	0	8	2	4	0	3	0	1
FBgn0028900	180.719	1.02466	0.230475	8.8066e-06	3.11197e-05	TRUE	CG18518	protein_coding	4.44457	253.649	220.904	308.494	204.397	306.741	291.615	121.855	58.5227	167.041	207.59	109.599	100.377	332	279	407	252	360	394	128	58	171	240	59	89
FBgn0037223	14.2001	1.02257	0.446015	0.0232639	0.0397991	TRUE	TwdlU	pseudogene	2.26907	21.3906	26.9183	32.5921	36.5026	19.6048	22.2	21.8894	2.0185	13.6776	6.92094	13.0035	16.9189	28	34	43	45	23	30	23	2	14	8	7	15
FBgn0038051	58.4656	1.02246	0.277057	0.000226511	0.000632783	TRUE	CG17207	protein_coding	3.68745	73.3999	72.8994	93.2505	77.7919	99.2708	89.7473	46.8019	16.1015	49.7512	70.7799	40.8623	18.0279	96	92	123	96	117	121	49	16	51	82	22	16
FBgn0010040	66.6841	1.02205	0.219535	3.42369e-06	1.29157e-05	TRUE	GstD4	protein_coding	4.64361	169.899	145.282	90.1249	160.317	94.2828	116.066	57.3994	78.4255	73.6183	63.6072	39.0267	62.2438	223	184	119	197	109	158	61	77	75	73	21	55
FBgn0085263	27.4134	1.02197	0.233662	1.27876e-05	4.38779e-05	TRUE	CG34234	protein_coding	4.36371	38.0136	34.676	59.8125	29.3632	44.5607	40.2046	25.2109	14.3466	18.7099	26.2684	22.3039	12.4799	50	44	79	36	51	55	27	14	19	30	12	11
FBgn0264817	1138.56	1.02182	0.0775601	1.24084e-39	9.1071e-38	TRUE	pre-lola-G	protein_coding	13.1739	1894.21	1805.05	1577.02	1886.06	1540.39	1833.77	965.241	948.751	836.348	750.987	786.055	888.266	2475	2273	2084	2331	1830	2461	1001	946	861	873	427	793
FBgn0265868	1.07879	1.02174	0.802728	0.243859	0.309913	FALSE	lncRNA:CR44657	ncRNA	1.1654	7.65662	2.38058	0	1.61776	1.6836	0	0.961091	0	0	2.57946	0	0	10	3	0	2	2	0	1	0	0	3	0	0
FBgn0267674	29.3458	1.02155	0.263161	0.000105946	0.000312855	TRUE	lncRNA:CR46010	ncRNA	3.87655	41.5796	43.9686	36.385	39.328	33.8561	44.9265	27.605	5.17903	23.7794	24.7522	18.5756	14.8415	55	56	48	48	38	62	30	5	24	28	10	13
FBgn0030540	1.18274	1.01925	0.793674	0.225295	0.28957	FALSE	CG11581	protein_coding	1.21257	2.57306	0	1.7018	6.37357	2.86916	0	2.13763	0	0	1.94186	0	0	3	0	2	7	3	0	2	0	0	2	0	0
FBgn0029880	18.8942	1.01899	0.271162	0.000178557	0.000509283	TRUE	CG14443	protein_coding	3.74757	27.5587	19.8344	28.8189	25.0813	26.9657	32.004	20.1663	6.01214	11.68	18.0656	11.1418	8.99981	36	25	38	31	32	43	21	6	12	21	6	8
FBgn0052249	4.18119	1.01893	0.55413	0.0731161	0.108911	FALSE	CG32249	protein_coding	1.79211	3.81729	4.74725	12.8829	3.24721	14.5413	7.38704	2.84738	8.09168	2.93417	0.866596	0	5.64407	5	6	17	4	17	10	3	8	3	1	0	5
FBgn0026388	4.42405	1.0181	0.554948	0.0680591	0.102118	FALSE	Or46a	protein_coding	1.82462	2.35347	4.02522	9.22137	9.7361	4.97021	4.4528	5.13411	1.08502	4.95839	0	0	3.47016	3	5	12	12	6	6	5	1	5	0	0	3
FBgn0032294	178.262	1.01775	0.281135	0.000295962	0.000808312	TRUE	Vha16-5	protein_coding	3.61881	212.564	223.45	316.573	226.234	284.578	312.203	122.327	42.7776	184.537	237.002	76.1949	93.9316	279	283	418	278	329	425	130	42	188	272	41	83
FBgn0043841	13366.9	1.01773	0.147742	5.64002e-12	4.27183e-11	TRUE	vir-1	protein_coding	6.88846	16117.8	22691.5	22478.6	22766.3	16953	19528.3	9212.2	11322	8300.5	7082.42	13754.4	9514.16	20714	28464	29196	27641	19713	26107	9625	11214	8499	8146	7468	8467
FBgn0028667	122.959	1.01663	0.294884	0.000569707	0.001461	TRUE	Vha16-3	protein_coding	3.44564	159.964	154.489	214.943	164.488	231.708	193.374	109.585	20.5705	97.7105	149.511	90.8084	69.7734	215	190	283	197	268	259	119	19	102	173	49	62
FBgn0035257	17.1286	1.01645	0.342728	0.00328048	0.00709514	TRUE	CG12011	protein_coding	2.94016	38.2573	36.4771	21.2321	44.5267	37.1791	21.5544	16.29	23.0861	13.6389	16.367	3.71427	20.2623	50	46	28	55	44	29	17	23	14	19	2	18
FBgn0033326	76.8549	1.01562	0.192121	1.27912e-07	5.9691e-07	TRUE	CG14743	protein_coding	5.28181	94.8914	114.205	141.047	117.368	130.026	118.967	50.8176	46.1497	63.3073	92.137	59.4268	37.1409	124	144	186	145	154	160	53	46	65	107	32	33
FBgn0003507	1225.81	1.01536	0.14018	4.39152e-13	3.70695e-12	TRUE	srp	protein_coding	7.24291	2430.32	1743.5	1602.97	1835.19	1320.29	1868.51	837.947	1133.6	777.813	778.04	807.376	979.175	3243	2227	2066	2196	1491	2383	842	1089	747	879	441	849
FBgn0031533	139.635	1.01535	0.207141	9.6175e-07	3.94828e-06	TRUE	CG2772	protein_coding	4.89931	204.916	183.048	250.187	187.988	241.763	235.148	106.038	49.3044	137.538	164.848	89.1536	86.7553	268	231	330	232	285	317	111	49	141	191	48	77
FBgn0025615	1004.87	1.01495	0.175395	7.20279e-09	3.95092e-08	TRUE	Torsin	protein_coding	5.78613	2416.98	1658.94	1234.39	1659.39	1090.95	1526.35	747.401	1099.52	683.94	628.016	837.119	710.051	3169	2099	1637	2055	1285	2075	782	1087	698	725	449	631
FBgn0020304	7096.39	1.01491	0.147659	6.27619e-12	4.72391e-11	TRUE	drongo	protein_coding	6.87324	7494.98	11894.1	11004.5	12588.9	9369.83	11632.3	4948.81	6526.3	4670.29	4898.99	4922.79	5505.69	9845	14853	14221	15280	10732	15342	5130	6617	4800	5770	2680	5023
FBgn0026598	370.388	1.01471	0.292979	0.000536058	0.0013831	TRUE	Apc2	protein_coding	3.46206	255.99	756.827	929.853	686.898	465.968	471.469	224.763	618.927	217.228	242.768	200.086	216.682	338	905	1163	807	558	639	236	623	226	286	109	195
FBgn0052369	1566.32	1.01461	0.165649	9.08513e-10	5.52852e-09	TRUE	CG32369	protein_coding	6.12471	1384.43	2990.43	2544.62	3260.68	2331.38	2468.08	1154.18	1513.33	1095.31	1026.98	1215.47	1353.79	1816	3720	3337	3894	2733	3322	1203	1523	1133	1203	658	1211
FBgn0014850	280.526	1.01409	0.628984	0.124882	0.17329	FALSE	Eig71Ej	protein_coding	1.5346	73.8307	823.381	838.329	753.17	313.267	706.848	302.944	443.451	331.885	253.812	3.69888	203.719	99	1055	1096	913	342	985	336	423	332	283	2	176
FBgn0038897	287.042	1.01406	0.336484	0.00255513	0.00566345	TRUE	CG5849	protein_coding	3.01674	113.94	305.447	368.245	360.084	279.673	293.411	152.615	131.263	75.9751	56.7954	310.196	102.257	149	385	485	445	333	394	159	131	78	66	167	91
FBgn0265500	7.41695	1.0139	0.455489	0.0267674	0.0451261	TRUE	lncRNA:CR44369	ncRNA	2.21489	7.5665	13.3548	6.0622	5.73181	17.7729	10.8809	4.60957	0	4.94998	9.71191	3.71585	4.56226	10	17	8	7	20	15	5	0	5	11	2	4
FBgn0038717	5.21015	1.01334	0.575889	0.0768658	0.113921	FALSE	CG17751	protein_coding	1.76917	0.765085	4.7575	8.34101	13.7642	3.38144	5.2016	6.70528	1.00403	0.97435	0	5.57148	2.2516	1	6	11	17	4	7	7	1	1	0	3	2
FBgn0033997	11.3765	1.01289	0.493779	0.0372147	0.0601632	FALSE	Ir51a	pseudogene	2.0834	5.35571	6.34347	15.1656	8.90601	2.53578	4.45879	2.87396	4.01581	4.87156	0.861563	0	5.62884	7	8	20	11	3	6	3	4	5	1	0	5
FBgn0030016	7.05334	1.01245	0.421386	0.0174928	0.030949	TRUE	Or7a	protein_coding	2.37618	15.2882	15.8441	6.06469	11.3478	8.49522	12.6013	2.86264	9.06416	2.92772	8.63695	7.4298	2.25413	20	20	8	14	10	17	3	9	3	10	4	2
FBgn0031337	435.376	1.01201	0.208311	1.18536e-06	4.76859e-06	TRUE	CG14346	protein_coding	4.85807	487.353	421.525	586.227	557.885	659.744	555.32	225.301	156.307	299.885	472.261	199.699	241.893	649	544	756	691	764	744	239	149	325	548	107	211
FBgn0265801	35.9355	1.01177	0.27923	0.000288389	0.000789698	TRUE	lncRNA:CR44590	ncRNA	3.62551	50.4553	34.8599	34.8728	36.4714	48.4009	32.6224	27.682	8.05475	12.6849	25.9051	31.5762	11.2695	66	44	46	45	57	44	29	8	13	30	17	10
FBgn0263844	1.18919	1.01059	0.752498	0.19484	0.255253	FALSE	lncRNA:CR43705	ncRNA	1.29639	2.27807	1.57475	0.757134	0.816537	1.75609	5.10516	0	0	1.97252	0	1.85865	1.13611	3	2	1	1	2	7	0	0	2	0	1	1
FBgn0267916	1.27193	1.01007	0.763017	0.212779	0.275987	FALSE	lncRNA:CR46197	ncRNA	1.24596	3.05457	1.58278	0	5.68101	3.41714	0.739172	1.90012	2.02132	0	0	0	1.12849	4	2	0	7	4	1	2	2	0	0	0	1
FBgn0028533	8.31796	1.00988	0.715471	0.15671	0.211031	FALSE	CG7953	protein_coding	1.41622	1.54943	6.42299	19.9835	17.2716	16.4152	8.25583	1.79955	12.2775	3.9621	1.75412	0	6.38691	2	8	26	21	19	11	2	12	4	2	0	6
FBgn0031086	2.1599	1.00891	0.67718	0.15882	0.213412	FALSE	fd19B	protein_coding	1.40905	0.763601	0.791347	8.33641	8.11628	5.98181	2.21718	2.8495	2.0217	1.95553	2.59856	0	1.12857	1	1	11	10	7	3	3	2	2	3	0	1
FBgn0267772	9.35766	1.0067	0.424506	0.0181926	0.0320456	TRUE	lncRNA:CR46103	ncRNA	2.36167	19.0256	7.09882	13.6296	11.407	15.6557	10.9892	6.55906	1.02196	8.84978	10.4841	5.57572	3.39962	25	9	18	14	18	15	7	1	9	12	3	3
FBgn0033224	3698.39	1.00627	0.081434	4.48479e-35	2.4093e-33	TRUE	Nop17l	protein_coding	12.3566	5038.96	6245.38	6245.74	5987.12	5156.58	5712.24	2962.34	2826.74	2956.1	3284.32	2291.62	2747.37	6579	7884	8255	7420	6153	7671	3074	2826	3038	3822	1233	2441
FBgn0266727	7.65348	1.00603	0.469864	0.0332879	0.0546169	FALSE	lncRNA:CR45200	ncRNA	2.12859	19.0307	10.2564	5.30055	7.33115	6.0809	19.7921	5.62723	2.04241	5.89757	0.873151	11.1512	7.93011	25	13	7	9	7	27	6	2	6	1	6	7
FBgn0031900	4.084	1.00597	0.633713	0.122274	0.170033	FALSE	CG13786	protein_coding	1.5453	6.12403	13.4871	7.58387	9.70912	0.842771	6.69814	0.960214	2.00419	1.94675	6.8825	0	6.75003	8	17	10	12	1	9	1	2	2	8	0	6
FBgn0033740	96.9451	1.00563	0.138834	4.5166e-13	3.80431e-12	TRUE	dgt5	protein_coding	7.2391	116.439	168.996	169.259	145.936	138.709	127.5	72.1572	71.4955	70.9262	73.1516	86.0764	59.0847	153	212	223	179	164	170	76	73	73	85	46	54
FBgn0032967	249.173	1.0051	0.246817	4.67833e-05	0.000146156	TRUE	CG1428	protein_coding	4.07114	368.16	324.441	388.281	333.402	426.75	395.046	192.893	69.1759	230.744	320.15	148.561	130.522	481	409	512	412	506	531	201	69	237	372	80	116
FBgn0030647	102.906	1.00494	0.171466	4.70669e-09	2.63349e-08	TRUE	CG6324	protein_coding	5.85722	161.622	169.093	158.53	160.072	158.728	143.892	81.8442	38.9956	95.281	108.212	83.5539	61.8251	211	213	209	198	189	193	85	39	98	126	45	55
FBgn0032167	2026.92	1.0049	0.182525	3.6865e-08	1.84596e-07	TRUE	CG5853	protein_coding	5.50525	2416.56	3879.49	3180.53	3751.59	2641.92	3116.91	1452.52	2348.29	1301.4	1205.74	1488.11	1579.11	3153	4881	4190	4635	3141	4185	1511	2354	1338	1398	801	1401
FBgn0036654	599.218	1.00482	0.203298	7.72121e-07	3.21026e-06	TRUE	CG9692	protein_coding	4.94229	735.885	696.375	791.31	872.345	1014.51	840.883	392.797	195.008	515.952	641.064	334.235	356.093	962	879	1044	1077	1197	1133	411	194	529	743	180	316
FBgn0013811	1092.4	1.00467	0.181887	3.32777e-08	1.67708e-07	TRUE	Dhc62B	protein_coding	5.52325	1693.86	1552.18	1642.45	1643.07	1783.49	1439.95	914.348	469.918	869.175	1292.03	659.067	607.644	2210	1954	2165	2034	2131	1928	947	471	895	1507	355	541
FBgn0052304	1.3293	1.0037	0.738924	0.192578	0.252798	FALSE	obst-I	protein_coding	1.30299	3.80985	3.15862	0.757388	0.8137	3.45789	1.46961	2.82416	0	0	1.7422	0	0	5	4	1	1	4	2	3	0	0	2	0	0
FBgn0028983	755.748	1.00366	0.1268	2.4865e-15	2.58626e-14	TRUE	Spn55B	protein_coding	7.9143	960.251	1622.69	1304.72	1416.58	1132.28	1229.53	686.543	793.188	551.233	543.898	577.651	652.442	1256	2048	1721	1748	1334	1658	719	788	565	630	311	579
FBgn0015625	732.403	1.00365	0.167251	1.97094e-09	1.15529e-08	TRUE	CycB3	protein_coding	6.00018	1017.99	1101.6	1414.72	980.562	1209.57	1205.71	664.527	426.118	588.294	881.466	438.685	424.544	1300	1416	1854	1250	1439	1626	686	456	589	1009	241	375
FBgn0263443	44.6298	1.00225	0.275008	0.000271673	0.000747738	TRUE	asRNA:CR43466	ncRNA	3.64091	63.8559	56.7396	79.4976	57.915	56.8139	60.6623	32.6721	12.2994	32.4997	50.7942	22.3038	30.6356	84	72	105	71	65	83	35	12	33	58	12	27
FBgn0037419	7713.05	1.00203	0.557023	0.0803283	0.118357	FALSE	Osi12	protein_coding	1.74878	27784.4	11164.8	9929.92	17791.1	11129.2	17360	4794.91	15075.1	6446.82	8015.51	46.428	9065.78	36311	14079	13095	21977	13174	23354	5003	15021	6618	9306	25	8054
FBgn0036070	195.945	1.00199	0.226544	9.7691e-06	3.42269e-05	TRUE	CG8072	protein_coding	4.42222	240.679	263.681	281.971	261.96	305.758	249.481	108.564	49.4282	177.762	218.788	120.744	111.644	315	333	372	323	359	337	114	49	182	253	65	99
FBgn0262146	183.747	1.0019	0.3424	0.00342123	0.00736696	TRUE	MtnE	protein_coding	2.92711	100.255	250.433	167.63	300.32	207.82	290.059	90.151	103.553	147.467	60.3157	85.9425	147.274	137	323	214	361	219	400	101	96	144	71	46	126
FBgn0036194	1494.92	1.00084	0.098905	4.55786e-24	9.84159e-23	TRUE	Dph1	protein_coding	10.1188	1680.74	2149.23	2144.45	2499.6	2274.76	2542.22	1031.99	1225.33	1013.25	1005.24	1177.02	1176.85	2206	2711	2829	3090	2694	3421	1079	1222	1041	1165	632	1044
FBgn0265834	24.5841	1.00036	0.305673	0.00103847	0.00251385	TRUE	CG44623	protein_coding	3.27989	22.0551	21.2842	21.2001	17.9378	30.5359	19.0191	14.9568	4.09546	11.8111	14.8747	14.8692	3.40234	29	27	28	22	35	26	16	4	12	17	8	3
FBgn0053229	1325.62	0.999882	0.162153	7.00566e-10	4.30332e-09	FALSE	CG33229	protein_coding	6.16596	1457.07	2705.15	2017.52	2316.65	1667.16	1919.2	1055	1169.67	806.803	720.562	1205.41	1046.99	1900	3397	2647	2847	1970	2574	1107	1185	830	839	651	931
FBgn0266431	52.2245	0.998783	0.358861	0.00545012	0.011107	FALSE	CG45061	protein_coding	2.77915	31.7436	77.7222	56.8558	197.495	67.7557	59.4014	47.8241	48.7002	31.7127	37.1415	39.0076	31.9744	42	99	75	241	76	82	52	47	32	42	21	28
FBgn0030270	112.964	0.998426	0.525591	0.0548663	0.0846885	FALSE	CG15199	protein_coding	1.91993	64.354	54.6373	44.1558	102.911	77.2212	116.847	36.765	28.3464	11.5438	16.7821	90.5971	25.8867	82	68	62	124	88	158	38	27	13	19	50	25
FBgn0035607	14.6948	0.998058	0.338266	0.00312634	0.00679374	FALSE	CG4835	protein_coding	2.95503	14.5542	19.8473	15.1704	12.9345	10.9155	15.6583	3.85213	2.99926	6.80532	9.44611	11.1404	10.1164	19	25	20	16	13	21	4	3	7	11	6	9
FBgn0034740	603.834	0.997744	0.267559	0.000192746	0.000546167	FALSE	nsr	protein_coding	3.72834	771.491	843.354	1071.83	791.684	1009.08	1024.23	545.949	154.217	535.131	827.813	338.957	299.539	1013	1040	1383	982	1163	1344	563	154	550	997	186	263
FBgn0035151	425.313	0.99759	0.185509	7.579e-08	3.64786e-07	FALSE	CG17129	protein_coding	5.37687	549.589	590.268	724.03	584.637	661.449	622.639	325.805	184.815	359.117	512.838	228.782	234.236	725	741	952	721	790	843	341	183	373	588	123	213
FBgn0264702	3.88448	0.996995	0.495242	0.0485879	0.0759195	FALSE	asRNA:CR43971	ncRNA	1.97219	9.91711	8.69613	3.78811	4.87557	5.15488	7.37078	3.78354	2.0285	2.93836	6.07933	1.85808	1.12995	13	11	5	6	6	10	4	2	3	7	1	1
FBgn0039621	2.51709	0.996719	0.657574	0.125854	0.174453	FALSE	CG14518	protein_coding	1.53066	2.28135	2.36475	3.02857	4.89272	0.872835	2.92539	2.80347	0	0.984396	0	1.85866	1.13422	3	3	4	6	1	4	3	0	1	0	1	1
FBgn0035008	2535.33	0.996093	0.219056	5.43872e-06	1.98746e-05	FALSE	CG3494	protein_coding	4.54711	3603.09	3129.98	3540.17	3632.34	3897.77	3224.36	1790.83	827.626	2331.52	2707.08	1250.42	1491.2	4721	3958	4671	4475	4552	4369	1890	817	2383	3124	673	1321
FBgn0036470	64.0553	0.995916	0.359935	0.00569245	0.0115407	FALSE	EAChm	protein_coding	2.76499	82.3467	69.5358	111.356	77.2413	89.5884	105.998	59.4696	5.07963	50.9746	84.3506	22.2985	33.919	108	88	147	95	104	144	63	5	52	97	12	30
FBgn0262524	98.9868	0.995356	0.141188	1.84642e-12	1.46449e-11	FALSE	ver	protein_coding	7.04562	126.396	153.912	129.541	196.77	131.212	149.563	62.9478	84.4431	81.7207	67.8348	71.3971	74.3734	165	197	170	240	155	203	68	82	85	77	38	65
FBgn0034837	606.734	0.995117	0.208619	1.84605e-06	7.20762e-06	FALSE	RpL22-like	protein_coding	4.76959	843.886	800.894	996.117	818.695	939.729	874.602	436.018	205.476	524.091	700.514	445.79	300.938	1104	1011	1314	1010	1106	1180	457	204	537	811	240	267
FBgn0260632	3281.23	0.994915	0.109607	1.11591e-19	1.70696e-18	FALSE	dl	protein_coding	9.07702	4227.29	6207.38	5022.11	5893.96	3934.26	4346.03	2521.44	2553.34	2293.94	2143.87	2607.34	2703.78	4784	6753	5643	6177	4064	4880	2740	2662	2439	2606	1584	2563
FBgn0030495	51.5054	0.994911	0.216207	4.33275e-06	1.60812e-05	FALSE	CG11816	protein_coding	4.59475	92.4606	82.7823	73.8666	77.2246	85.3752	78.0048	42.7315	68.1494	36.3484	48.5281	13.92	25.3239	119	102	100	97	105	107	43	68	37	56	7	21
FBgn0039124	642.712	0.994737	0.236733	2.65405e-05	8.63491e-05	FALSE	tbrd-1	protein_coding	4.20128	947.089	873.642	1081.79	858.747	1115.39	1010.08	556.664	197.135	567.82	826.069	427.978	330.059	1248	1101	1420	1067	1319	1371	581	194	579	964	229	294
FBgn0030230	357.776	0.994486	0.266549	0.000190443	0.000540031	FALSE	Rph	protein_coding	3.73137	287.398	593.545	461.238	554.113	374.906	444.309	209.8	350.361	123.252	122.35	376.303	159.419	372	735	610	682	440	586	218	349	129	146	203	140
[truncated: 14,567 more rows]

## Sheet: Excel Table 2
Ensembl_Id	baseMean	log2FoldChange	lfcSE	pvalue	padj	significant_DE	Feature_name	biotype	stat	w_AdarOE_1_normCounts	w_AdarOE_2_normCounts	w_AdarOE_3_normCounts	w_AdarOE_4_normCounts	w_AdarOE_5_normCounts	w_AdarOE_6_normCounts	AdarRNAi_1_normCounts	AdarRNAi_2_normCounts	AdarRNAi_3_normCounts	AdarRNAi_4_normCounts	AdarRNAi_5_normCounts	AdarRNAi_6_normCounts	w_AdarOE_1_rawCounts	w_AdarOE_2_rawCounts	w_AdarOE_3_rawCounts	w_AdarOE_4_rawCounts	w_AdarOE_5_rawCounts	w_AdarOE_6_rawCounts	AdarRNAi_1_rawCounts	AdarRNAi_2_rawCounts	AdarRNAi_3_rawCounts	AdarRNAi_4_rawCounts	AdarRNAi_5_rawCounts	AdarRNAi_6_rawCounts
[truncated: 18,984 more rows]

[truncated: 6 more sheets: Excel Table 3, Excel Table 4, Excel Table 5, Excel Table 6, Excel Table 7, Excel Table 8]
